# Supplementary material for: An exploration of the association between fuel subsidies andfuel riots
Source: Research Square preprint supplement (doi:10.21203/rs.3.rs-142268/v1), 2021-01-18
Supplement: Supplementary file 1 [file e1f2b80fbf0b85300dae61da.docx]

Appendix. Database of fuel riots collected for the period 2005-2016.

| **Country** | **2005** | **2006** | **2007** | **2008** | **2010** | **2011** | **2012** | **2013** | **2014** | **2015** | **2017** | **2018** |
| --- | --- | --- | --- | --- | --- | --- | --- | --- | --- | --- | --- | --- |
| Yemen | July (IRIN, 2005) |  |  |  |  | July (Raghavan, 2011) |  |  | August (Mawry, 2014) |  |  |  |
| Canada | August (Menzies, 2005) |  |  |  |  |  |  |  |  |  |  |  |
| Iraq |  | January (Gupta, 2006) |  |  |  |  |  |  |  |  |  |  |
| India |  | June (The Times of India, 2006) |  | June (Alter, 2008) | June (Hindustan Times, 2010); July (Timmons and Kumar, 2010) | September (The Hindu, 2011) |  | February (Banerji, 2013) |  | May (The Tribune India, 2015) |  | September (Saberin, 2018) |
| Iran |  |  | June (Blair, 2007) |  |  |  |  |  |  |  |  |  |
| Myanmar |  |  | August (Mydans, 2007) |  |  |  |  |  |  |  |  |  |
| Mozambique |  |  |  | February (Musa, 2008) |  |  |  |  |  |  |  |  |
| Cameroon |  |  |  | February (IRIN, 2008a) |  |  |  |  |  |  |  |  |
| Burkina Faso |  |  |  | February (IRIN, 2008b) |  |  |  |  |  |  |  |  |
| Indonesia | October (The Sydney Morning Herald, 2005) |  |  | June (The Jakarta Post, 2009) |  |  | March (Express, 2012) | June (Weisenthal, 2013); August (SBS, 2013) | November (Jakarta Globe, 2014) |  |  |  |
| Nepal |  |  |  | June (Alter, 2008) |  |  |  |  | March (Sharma, 2014) |  |  |  |
| France |  |  |  | June (Siddique, 2008; The Daily Mail, 2008) |  |  |  |  |  |  |  | November (Willis, 2018) |
| Italy |  |  |  | June (Siddique, 2008) |  |  |  | December (RT, 2013) |  |  |  |  |
| Spain |  |  |  | June (Siddique, 2008; The Daily Mail, 2008) |  |  |  |  |  |  |  |  |
| Portugal |  |  |  | June (Siddique, 2008; The Daily Mail, 2008) |  |  |  |  |  |  |  |  |
| Thailand |  |  |  | June (The Daily Mail, 2008) |  |  |  |  |  |  |  |  |
| China |  |  | October (Graham-Harrison, 2008) |  |  | April (White, 2011) |  |  | August (Knowler, 2014) |  |  |  |
| Guinea |  |  |  | November (Samb, 2008) |  |  |  |  |  |  |  |  |
| Bolivia |  |  |  |  | December (Kraul, 2011) |  |  |  |  |  |  |  |
| Chile |  |  |  |  |  | January (Russell, 2011) |  |  |  |  |  |  |
| Libya |  |  |  |  |  | February (Kim, 2011) |  |  |  |  |  |  |
| Uganda |  |  |  |  |  | April (Kron, 2011) |  |  |  |  |  |  |
| Malawi |  |  |  |  |  | July (Industriall Union, 2011) |  |  |  |  |  |  |
| Pakistan |  |  |  |  |  | December (Dawn, 2011) |  |  |  |  |  |  |
| Nigeria |  |  |  |  |  |  | January (The Tripoli Post, 2012) |  |  |  |  |  |
| Sri Lanka |  |  |  |  |  |  | February (DBSJEYARAJ, 2012) |  |  |  |  |  |
| Jordan |  |  |  |  |  |  | November (Buck, 2012) |  |  |  |  |  |
| Bangladesh |  |  |  |  |  |  |  | January (Gulf Times, 2013) |  |  |  |  |
| Greece |  |  |  |  |  |  |  | February (Euronews, 2013) |  |  |  |  |
| Egypt |  |  |  |  |  |  |  | March (Haaretz, 2013) |  |  |  |  |
| Colombia |  |  |  |  |  |  |  | August (Wills, 2013) |  |  |  |  |
| Sudan |  |  |  |  |  |  |  | September (BBC News, 2013) |  |  |  |  |
| Venezuela |  |  |  |  |  |  |  |  | February (CTV News, 2014) |  |  |  |
| Chad |  |  |  |  |  |  |  |  | November (Holmes, 2014) |  |  |  |
| Haiti |  |  |  |  |  |  |  |  |  | February (Caribbean360, 2015) |  | July (Aljazeera, 2018) |
| Armenia |  |  |  |  |  |  |  |  |  | June (Jones, 2015) |  |  |
| Zambia |  |  |  |  |  |  |  |  |  | July (Lobelo, 2015) |  |  |
| Mexico |  |  |  |  |  |  |  |  |  |  | January (BBC News, 2017) |  |
| Togo |  |  |  |  |  |  |  |  |  |  | February (MFWA, 2017) |  |
| Belgium |  |  |  |  |  |  |  |  |  |  |  | November (Bremner, 2018) |

**References**

1. Aljazeera, 2018. Haiti suspends fuel price hike after deadly protests. *Aljazeera*, July 6. Available at: <https://www.aljazeera.com/economy/2018/7/8/haiti-suspends-fuel-price-hike-after-deadly-protests>. [Accessed on 20 December 2020]
2. Alter, L., 2008. Fuel Prices Fuel Protests Around the World. *Treehugger,* June, 11. Available at: <http://www.treehugger.com/corporate-responsibility/fuel-prices-fuel-protests-around-the-world.html>. [Accessed on 27 March 2017]
3. Banerji, A., 2013. Violence erupts during country-wide strike in India. *The Globe and Mail,* February, 20. Available at: <http://www.theglobeandmail.com/report-on-business/international-business/asian-pacific-business/violence-erupts-during-country-wide-strike-in-india/article8888999/>. [Accessed on 27 March 2017]
4. BBC News, 2013. Sudan fuel unrest: Many die in Khartoum as riots continue. *BBC News,* September, 25. Available at: <http://www.bbc.co.uk/news/world-africa-24272835>. [Accessed on 27 March 2017]
5. BBC News, 2017. Riots break out in Mexico over petrol price hike. *BBC News*, January, 7. Available at: <https://www.bbc.co.uk/news/av/world-latin-america-38543202>. [Accessed on 20 December 2020]
6. Blair, E., 2007. Riots as oil-rich Iran imposes fuel rations. *The Sydney Morning Herald,* June, 28. Available at: <http://www.smh.com.au/news/world/riots-as-oilrich-iran-imposes-fuel-rations/2007/06/27/1182623992366.html>. [Accessed on 27 March 2017]
7. Bremner, C. 2018. Paris braced for new riots as fuel protest spreads to Brussels. The Sunday Times, December 1. Available at: <https://www.thetimes.co.uk/article/paris-braced-for-new-riots-as-fuel-protest-spreads-to-brussels-tkzn8cxvw>. [Accessed on 20 December 2020]
8. Buck, T. 2012. Protests in Jordan after fuel subsidy cut.*Financial Times*, November, 14. Available at: <https://www.ft.com/content/066b952e-2df0-11e2-8ece-00144feabdc0>. [Accessed on 9 September 2018]
9. Caribbean360. 2015. Violent clashes in Haiti between police and protesters over high fuel costs.*Caribbean360*, February, 10. Available at: <http://www.caribbean360.com/news/violent-clashes-haiti-police-protesters-high-fuel-costs#ixzz3fCNlS1ZM>. [Accessed on 9 September 2018]
10. CTV News. 2014. 5 reasons why venezuelans are protesting against their government.*CTV News*, February, 21. Available at: <https://www.ctvnews.ca/world/5-reasons-why-venezuelans-are-protesting-against-their-government-1.1698766#ixzz32NTiUn6W>. [Accessed on 9 September 2018]
11. Dawn, 2011. Recovery of fuel surcharge: Lesco’s second attempt stokes up violence. *Dawn,* December, 7. Available at: <http://www.dawn.com/news/678898/recovery-of-fuel-surcharge-lescos-second-attempt-stokes-up-violence>. [Accessed on 27 March 2017]
12. DBSJEYARAJ, 2012. One Killed and eight critically injured in crackdown on fisherfolk protesting fuel price increase in Chilaw. *DBSJEYARAJ,* February, 16. Available at: <http://dbsjeyaraj.com/dbsj/archives/4247>. [Accessed on 27 March 2017]
13. Euronews, 2013. Greek farmers clash with police in fuel price protest. *Euronews,* February, 13. Available at: <http://www.euronews.com/2013/02/13/greek-farmers-clash-with-police-in-fuel-price-protest/>. [Accessed on 27 March 2017]
14. Express, 2012. Thousands riot over fuel prices. *Express,* March, 27. Available at: <http://www.express.co.uk/news/world/310821/Thousands-riot-over-fuel-prices>. [Accessed on 27 March 2017]
15. Graham-Harrison, E., 2008. China lifts fuel prices 10 pct as shortages bite. *Reuters,* October, 31. Available at: <http://uk.reuters.com/article/2009/04/29/idUKPEK184871>. [Accessed on 27 March 2017]
16. Gulf Times. 2012. Opposition enforces strike over fuel hike in Bangladesh.*Gulf Times*, January, 6. Available at: <https://www.gulf-times.com/story/337699/Opposition-enforces-strike-over-fuel-hike-in-Bangl>. [Accessed on 9 September 2018]
17. Gupta, A.K., 2006. IMF Ignites Iraq Fuel Riots. *The Indypendent,* January, 12. Available at: <https://www.indypendent.org/2006/01/12/imf-ignites-iraq-fuel-riots>. [Accessed on 27 March 2017]
18. Haaretz, 2013. At Least 50 Hurt in Egypt Protests; Morsi Mulls Army Takeover of Port Said. *Haaretz,* March, 5. Available at: <http://www.haaretz.com/news/middle-east/at-least-50-hurt-in-egypt-protests-morsi-mulls-army-takeover-of-port-said-1.507432>. [Accessed on 27 March 2017]
19. Hindustan Times, 2010. BJP leaders held for violent protest against fuel price hike. *Hindustan Times,* June, 27. Available at: <http://www.hindustantimes.com/mumbai/bjp-leaders-held-for-violent-protest-against-fuel-price-hike/article1-563773.aspx>. [Accessed on 27 March 2017]
20. Holmes, R. 2014. Student protests over fuel shortages in oil-rich chad leave five dead.*World*, November, 17. Available at: <https://world.wng.org/2014/11/student_protests_over_fuel_shortages_in_oil_rich_chad_leave_five_dead?>. [Accessed on 9 September 2018]
21. Industriall Union, 2011. 19 dead after violent disruption of civil protests in Malawi. *Industriall Global Union,* July, 26. Available at: <http://www.industriall-union.org/archive/imf/19-dead-after-violent-disruption-of-civil-protests-in-malawi>. [Accessed on 27 March 2017]
22. IRIN, 2005. Government lowers fuel prices after deadly riots. *IRIN,* July, 27. Available at: <http://www.irinnews.org/report/25307/yemen-government-lowers-fuel-prices-after-deadly-riots>. [Accessed on 27 March 2017]
23. Menzies, J., 2005. Violence spills over during B.C. trucker strike. *Truck News.com,* August, 1. Available at: <http://www.trucknews.com/features/violence-spills-over-during-b-c-trucker-strike>. [Accessed on 27 March 2017]
24. IRIN, 2008a. Douala burns as taxi strike turns into general rioting. *IRIN,* February, 25. Available at: <http://www.irinnews.org/report/76932/cameroon-douala-burns-as-taxi-strike-turns-into-general-rioting>. [Accessed on 27 March 2017]
25. IRIN, 2008b. Food riots shut down main towns. *IRIN,* February, 22. Available at: <http://www.irinnews.org/report/76905/burkina-faso-food-riots-shut-down-main-towns>. [Accessed on 27 March 2017]
26. Jakarta Globe. 2014. Makassar protest against fuel price hike leaves man dead.*Jakarta Globe*, November, 28. Available at: <http://jakartaglobe.id/news/makassar-protest-fuel-price-hike-leaves-man-dead/>. [Accessed on 9 September 2018]
27. Jones, C. 2015. Armenia's electric yerevan protests – in pictures.*The Guardian*, June, 24. Available at: <https://www.theguardian.com/world/gallery/2015/jun/24/armenia-electric-yerevan-protests-in-pictures>. [Accessed on 9 September 2018]
28. Kim, S. 2011. As Libya receives sanctions, gas prices jump after biggest one week oil rise in two years.*ABC News*, February, 28. Available at: <https://abcnews.go.com/Business/libya-receives-sanctions-gas-prices-jump-biggest-week/story?id=13020242>. [Accessed on 9 September 2018]
29. Knowler, G. 2014. Missed sailings loom as ningbo port trucker strike escalates.*JOC.Com*, August, 22. Available at: <https://www.joc.com/port-news/asian-ports/port-ningbo/missed-sailings-loom-ningbo-port-trucker-strike-escalates_20140822.html>. [Accessed on 9 September 2018]
30. Kraul, C., 2011. Bolivia leader restores fuel subsidies in the face of protests. *Los Angeles Times,* January, 1. Available at: <http://articles.latimes.com/2011/jan/01/world/la-fg-bolivia-morales-20110101>. [Accessed on 27 March 2017]
31. Kron, J. 2011. Protests in Uganda over rising prices grow violent.*The New York* *Times*, April 21. Available at: <http://www.nytimes.com/2011/04/22/world/africa/22uganda.html?_r=2&>. [Accessed on 27 March 2017]
32. Lobelo, D. 2015. Riots erupts over fuel hike in Zambia.*eNCA*, July, 16. Available at: <https://www.enca.com/africa/riots-erupts-over-fuel-hike-zambia>. [Accessed on 9 September 2018]
33. Mawry, Y. 2014. Yemen fuel crisis ignites street riots.*Middle East Eye*, August, 4. Available at: <https://www.middleeasteye.net/news/yemen-fuel-crises-ignites-ongoing-street-riots-393941730>. [Accessed on 9 September 2018]
34. MFWA 2017. One Person Dead, Dozens Injured at Demonstration. Media Foundation for West Africa, March 8. Available at: <https://www.mfwa.org/togo-one-person-dead-dozens-injured-at-demonstration/>. [Accessed on 20 December 2020]
35. Musa, T. 2008. Hungry crowds spell trouble for world leaders.*Reuters*, April, 1. Available at: <https://www.reuters.com/article/us-agflation-hunger-idUSL2350258020080401>. [Accessed on 9 September 2018]
36. Mydans, S. 2007. What makes a monk mad.*The New York Times*, September, 30. Available at: <https://www.nytimes.com/2007/09/30/weekinreview/30mydans.html>. [Accessed on 9 September 2018]
37. Raghavan, S., 2011. In Yemen, attacks fuel economic collapse. *The Washington Post,* July, 1. Available at: <https://www.washingtonpost.com/world/in-yemen-attacks-fuel-economic-collapse/2011/06/22/AGrvMItH_story.html>. [Accessed on 27 March 2017]
38. RT, 2013. 'Pitchfork' protesters clash with police as Italy hit by week of anti-austerity rallies. *RT,* December, 14. Available at: <http://rt.com/news/italy-pitchfork-protests-clashes-259/>. [Accessed on 27 March 2017]
39. Russell, T., 2011. Lyndhurst couple trapped in Chile as riots grip Punta Arenas. *Daily Echo,* January, 15. Available at: <http://www.dailyecho.co.uk/news/8793574.Hampshire_couple_trapped_as_riots_grip_Chile/>. [Accessed on 27 March 2017]
40. Saberin, Z. 2018. India: Opposition parties stage protests against high fuel prices. *Aljazeera*, September, 10. Available at: <https://www.aljazeera.com/news/2018/9/10/india-opposition-parties-stage-protests-against-high-fuel-prices> [Accessed on 20 December 2020]
41. Samb, S. 2008. Guinea troops shoot fuel price protesters, man killed.*Reuters*, November, 3. Available at: <https://www.reuters.com/article/idUSL3399176>. [Accessed on 27 March 2017]
42. SBS, 2013. Riots as Indonesia restricts cut to fuel subsidy. *SBS News,* August, 26. Available at: <http://www.sbs.com.au/news/article/2012/03/31/riots-indonesia-restricts-cut-fuel-subsidy>. [Accessed on 27 March 2017]
43. Sharma, G. 2014. Maoist students in angry protest over fuel price rise in nepal.*Reuters*, March, 19. Available at: <https://www.reuters.com/article/us-nepal-protests/maoist-students-in-angry-protest-over-fuel-price-rise-in-nepal-idUSBREA2I15H20140319>. [Accessed on 9 September 2018]
44. Siddique, H., 2008. Violence flares as fishers protest over fuel prices. *The Guardian,* June, 4. Available at: <http://www.theguardian.com/environment/2008/jun/04/fishing.eu>. [Accessed on 27 March 2017]
45. The Daily Mail, 2008. 'Scab' driver burned in his lorry as European protests against high fuel prices turn violent. *The Daily Mail,* June, 13. Available at: <http://www.dailymail.co.uk/news/article-1025783/Scab-driver-burned-lorry-European-protests-high-fuel-prices-turn-violent.html>. [Accessed on 27 March 2017]
46. The Hindu, 2011. Protests against fuel price hike turn violent in State. *The Hindu,* September, 17. Available at: <http://www.thehindu.com/todays-paper/protests-against-fuel-price-hike-turn-violent-in-state/article2461260.ece>. [Accessed on 27 March 2017]
47. The Jakarta Post. 2009. Court sends activist to prison over violent fuel price protest.*The Jakarta Post,* April, 9. Available at: <http://www.thejakartapost.com/news/2009/04/09/court-sends-activist-prison-over-violent-fuel-price-protest.html#sthash.48kWEK8K.dpuf>. [Accessed on 27 March 2017]
48. The Sydney Morning Herald. 2005. Hundreds rally in Indonesia against massive fuel price hike.*The Sydney Morning Herald*, October, 2. Available at: <https://www.smh.com.au/world/hundreds-rally-in-indonesia-against-massive-fuel-price-hike-20051002-gdm64j.html>. [Accessed on 8 September 2018]
49. The Times of India, 2006. Violence marks protest against fuel price hike. *The Times of India,* June, 13. Available at: <http://timesofindia.indiatimes.com/india/Violence-marks-protest-against-fuel-price-hike/articleshow/1643907.cms>. [Accessed on 27 March 2017]
50. The Tribune India. 2015. Cong workers protest fuel price hike, canecharged.*The Tribune India*, May, 26. Available at: <https://www.tribuneindia.com/news/punjab/cong-workers-protest-fuel-price-hike-canecharged/85329.html>. [Accessed on 9 September 2018]
51. The Tripoli Post, 2012. Tension Reigns in Nigeria After Riots and Sectarian Attacks Lead to Killings. *The Tripoli Post,* January, 11. Available at:
    <https://www.highbeam.com/doc/1G1-276879949.html>. [Accessed on 27 March 2017]
52. Timmons, H. and Kumar, H. 2010. Protests over fuel costs idle much of India.*The New York Times*, July, 5. Available at: <http://www.nytimes.com/2010/07/06/world/asia/06india.html>. [Accessed on 27 March 2017]
53. Weisenthal, J., 2013. Now Indonesia Is Seeing Riots Thanks To A Fuel Price Hike. *Business Insider,* June, 17. Available at: <http://www.businessinsider.com/now-indonesia-is-seeing-riots-thanks-to-a-fuel-price-hike-2013-6#ixzz2wtQcU9jw>. [Accessed on 27 March 2017]
54. White, G., 2011. Violent Trucker Fuel Protests In Shanghai. *Business Insider,* April, 21. Available at: <http://www.businessinsider.com/shanghai-truck-driver-protest-2011-4#ixzz32NVqDw11>. [Accessed on 27 March 2017]
55. Wills, S., 2013. As Farmers' Strike Paralyzes Colombia, President Questions Its Existence. *ABC News,* August, 27. Available at: <http://abcnews.go.com/ABC_Univision/ABC_Univision/farmers-strike-paralyzes-colombia-president-questions-existence/story?id=20081415>. [Accessed on 27 March 2017]
56. Willis, E. 2018. France fuel protest: Woman dies and 'several injured' as 'yellow vest' blockades under way. Evening Standard, November 17. Available at: <https://www.standard.co.uk/news/world/france-fuel-protest-woman-dies-and-several-injured-as-yellow-vest-blockades-under-way-a3992801.html> [Accessed on 20 December 2020]
