# Supplementary material for: An exploration of the association between fuel subsidies andfuel riots
Source: Research Square preprint supplement (doi:10.21203/rs.3.rs-142268/v1), 2021-01-18
Supplement: Supplementary file 3 [file b22680d8c47ce6db69fdcf47.csv]

code	year	country	v2x_regime	v2x_regime_amb	v2x_corr	v2x_execorr	v2x_pubcorr	v2x_clphy	v2x_clpol	v2x_clpriv	v2x_rule	v2x_freexp	v2csreprss	v2regsupgroupssize	v2csantimv	v2x_accountability	v2x_veracc	v2xcs_ccsi	v2ddthreci	v2exremhog	fuel.riot	democ	autoc	polity	polity2	Voice.Accountability	Political.stability	Government.effectiveness	Rule.of.law	Control.of.corruption	subsidies	subsidies_pc	subsidies_GDP	subsidies.scaled	year.scaled	subsidies_pc.scaled	subsidies_GDP.scaled	oil.price.nominal	oil.price.real	oil.price.nominal_scaled	oil.price.real_scaled	v2csreprss.scaled	v2regsupgroupssize.scaled	v2csantimv.scaled	polity2.scaled	v2x_corr.scaled	v2x_execorr.scaled	v2x_pubcorr.scaled	v2x_clphy.scaled
ABW	2005	Aruba	NA	NA	NA	NA	NA	NA	NA	NA	NA	NA	NA	NA	NA	NA	NA	NA	NA	NA	0	NA	NA	NA	NA	1.15	1.38	1.29	0.86	1.28	NA	NA	NA	NA	-1.612145878	NA	NA	53.39	60.88	-1.00698164	-0.779557242	NA	NA	NA	NA	NA	NA	NA	NA
ABW	2006	Aruba	NA	NA	NA	NA	NA	NA	NA	NA	NA	NA	NA	NA	NA	NA	NA	NA	NA	NA	0	NA	NA	NA	NA	1.02	1.31	1.29	0.82	1.26	NA	NA	NA	NA	-1.364217568	NA	NA	64.29	71.49	-0.500047889	-0.147905022	NA	NA	NA	NA	NA	NA	NA	NA
ABW	2007	Aruba	NA	NA	NA	NA	NA	NA	NA	NA	NA	NA	NA	NA	NA	NA	NA	NA	NA	NA	0	NA	NA	NA	NA	0.97	1.29	1.25	0.84	1.27	NA	NA	NA	NA	-1.116289259	NA	NA	71.12	74.52	-0.182400411	0.032481993	NA	NA	NA	NA	NA	NA	NA	NA
ABW	2008	Aruba	NA	NA	NA	NA	NA	NA	NA	NA	NA	NA	NA	NA	NA	NA	NA	NA	NA	NA	0	NA	NA	NA	NA	0.97	1.32	1.28	0.86	1.29	NA	NA	NA	NA	-0.868360949	NA	NA	96.99	94.32	1.020753362	1.211248623	NA	NA	NA	NA	NA	NA	NA	NA
ABW	2009	Aruba	NA	NA	NA	NA	NA	NA	NA	NA	NA	NA	NA	NA	NA	NA	NA	NA	NA	NA	0	NA	NA	NA	NA	1.25	1.12	1.5	1.43	1.12	NA	NA	NA	NA	-0.62043264	NA	NA	61.76	64.02	-0.617712328	-0.592621524	NA	NA	NA	NA	NA	NA	NA	NA
ABW	2010	Aruba	NA	NA	NA	NA	NA	NA	NA	NA	NA	NA	NA	NA	NA	NA	NA	NA	NA	NA	0	NA	NA	NA	NA	1.28	1.1	1.25	1.42	1.13	0	0	0	-0.292149193	-0.372504331	-0.271236208	-0.074589294	79.04	79.04	0.185940443	0.301574173	NA	NA	NA	NA	NA	NA	NA	NA
ABW	2011	Aruba	NA	NA	NA	NA	NA	NA	NA	NA	NA	NA	NA	NA	NA	NA	NA	NA	NA	NA	0	NA	NA	NA	NA	1.27	1.29	1.24	1.33	1.11	0	0	0	-0.292149193	-0.124576021	-0.271236208	-0.074589294	104.01	93.67	1.3472373	1.172551738	NA	NA	NA	NA	NA	NA	NA	NA
ABW	2012	Aruba	NA	NA	NA	NA	NA	NA	NA	NA	NA	NA	NA	NA	NA	NA	NA	NA	NA	NA	0	NA	NA	NA	NA	1.28	1.26	1.25	1.32	1.1	0	0	0	-0.292149193	0.123352288	-0.271236208	-0.074589294	105.01	95.27	1.393744984	1.267805608	NA	NA	NA	NA	NA	NA	NA	NA
ABW	2013	Aruba	NA	NA	NA	NA	NA	NA	NA	NA	NA	NA	NA	NA	NA	NA	NA	NA	NA	NA	0	NA	NA	NA	NA	1.28	1.31	1.23	1.3	1.13	0	0	0	-0.292149193	0.371280598	-0.271236208	-0.074589294	104.08	94.83	1.350492838	1.241610794	NA	NA	NA	NA	NA	NA	NA	NA
ABW	2014	Aruba	NA	NA	NA	NA	NA	NA	NA	NA	NA	NA	NA	NA	NA	NA	NA	NA	NA	NA	0	NA	NA	NA	NA	1.28	1.16	0.89	1.04	1.02	0	0	0	-0.292149193	0.619208907	-0.271236208	-0.074589294	96.24	88.9	0.985872599	0.888576141	NA	NA	NA	NA	NA	NA	NA	NA
ABW	2015	Aruba	NA	NA	NA	NA	NA	NA	NA	NA	NA	NA	NA	NA	NA	NA	NA	NA	NA	NA	0	NA	NA	NA	NA	1.27	1.23	0.88	1.26	1.3	0	0	0	-0.292149193	0.867137216	-0.271236208	-0.074589294	50.75	51.86	-1.129761924	-1.316550929	NA	NA	NA	NA	NA	NA	NA	NA
ABW	2016	Aruba	NA	NA	NA	NA	NA	NA	NA	NA	NA	NA	NA	NA	NA	NA	NA	NA	NA	NA	0	NA	NA	NA	NA	1.28	1.28	0.89	1.26	1.29	0	0	0	-0.292149193	1.115065526	-0.271236208	-0.074589294	42.81	45.53	-1.499032931	-1.693399049	NA	NA	NA	NA	NA	NA	NA	NA
ABW	2017	Aruba	NA	NA	NA	NA	NA	NA	NA	NA	NA	NA	NA	NA	NA	NA	NA	NA	NA	NA	0	NA	NA	NA	NA	1.29	1.33	0.92	1.33	1.29	0	0	0	-0.292149193	1.362993835	-0.271236208	-0.074589294	52.81	54.28	-1.033956096	-1.172479452	NA	NA	NA	NA	NA	NA	NA	NA
ABW	2018	Aruba	NA	NA	NA	NA	NA	NA	NA	NA	NA	NA	NA	NA	NA	NA	NA	NA	NA	NA	0	NA	NA	NA	NA	1.31	1.37	1.06	1.3	1.25	NA	NA	NA	NA	1.610922145	NA	NA	68.35	67.1	-0.311226694	-0.409257826	NA	NA	NA	NA	NA	NA	NA	NA
AFG	2005	Afghanistan	1	3	0.928	0.87	0.917	0.543	0.707	0.452	0.196	0.597	2.027	0.806	0.932	0.475	0.388	0.748	0	NA	0	-66	-66	-66	NA	-1.13	-2.07	-1.21	-1.66	-1.44	NA	NA	NA	NA	-1.612145878	NA	NA	53.39	60.88	-1.00698164	-0.779557242	0.743907388	-0.001468187	1.452838699	NA	1.336071077	1.278381992	1.374622604	-0.536348219
AFG	2006	Afghanistan	1	3	0.937	0.87	0.93	0.543	0.734	0.452	0.199	0.606	2.027	0.806	0.932	0.497	0.385	0.748	0	NA	0	-66	-66	-66	NA	-1.11	-2.22	-1.43	-1.86	-1.43	NA	NA	NA	NA	-1.364217568	NA	NA	64.29	71.49	-0.500047889	-0.147905022	0.743907388	-0.001468187	1.452838699	NA	1.365760398	1.278381992	1.417658446	-0.536348219
AFG	2007	Afghanistan	1	3	0.938	0.866	0.932	0.544	0.728	0.452	0.196	0.599	2.027	0.806	0.969	0.485	0.383	0.743	0	NA	0	-66	-66	-66	NA	-1.06	-2.41	-1.4	-1.83	-1.59	NA	NA	NA	NA	-1.116289259	NA	NA	71.12	74.52	-0.182400411	0.032481993	0.743907388	-0.001468187	1.485860462	NA	1.369059212	1.264823379	1.424279345	-0.532610523
AFG	2008	Afghanistan	1	3	0.938	0.866	0.932	0.544	0.737	0.452	0.188	0.63	2.069	0.806	0.969	0.495	0.388	0.746	0	NA	0	-66	-66	-66	NA	-1.17	-2.69	-1.5	-1.86	-1.64	NA	NA	NA	NA	-0.868360949	NA	NA	96.99	94.32	1.020753362	1.211248623	0.773968075	-0.001468187	1.485860462	NA	1.369059212	1.264823379	1.424279345	-0.532610523
AFG	2009	Afghanistan	1	3	0.938	0.866	0.932	0.557	0.732	0.452	0.206	0.632	2.069	0.806	1.396	0.48	0.325	0.726	0	NA	0	-66	-66	-66	NA	-1.38	-2.71	-1.48	-1.85	-1.53	NA	NA	NA	NA	-0.62043264	NA	NA	61.76	64.02	-0.617712328	-0.592621524	0.773968075	-0.001468187	1.866949451	NA	1.369059212	1.264823379	1.424279345	-0.484020467
AFG	2010	Afghanistan	1	3	0.938	0.866	0.935	0.561	0.684	0.377	0.199	0.551	2.069	0.806	1.966	0.469	0.325	0.731	0	NA	0	-66	-66	-66	NA	-1.4	-2.58	-1.45	-1.85	-1.64	0.034196075	2.57E-05	4.89E-05	-0.287564051	-0.372504331	-0.268248054	-0.074446614	79.04	79.04	0.185940443	0.301574173	0.773968075	-0.001468187	2.375663091	NA	1.369059212	1.264823379	1.434210693	-0.46906968
AFG	2011	Afghanistan	1	3	0.938	0.866	0.935	0.503	0.689	0.398	0.209	0.551	1.683	0.806	1.966	0.457	0.322	0.69	0	NA	0	-66	-66	-66	NA	-1.34	-2.5	-1.45	-1.9	-1.58	0.020329093	1.47E-05	2.59E-05	-0.28942339	-0.124576021	-0.269529153	-0.074513861	104.01	93.67	1.3472373	1.172551738	0.497696053	-0.001468187	2.375663091	NA	1.369059212	1.264823379	1.434210693	-0.685856084
AFG	2012	Afghanistan	1	3	0.942	0.866	0.95	0.476	0.693	0.407	0.197	0.546	1.683	0.806	1.966	0.454	0.337	0.69	0	NA	0	-66	-66	-66	NA	-1.27	-2.42	-1.36	-1.64	-1.42	0.020672968	1.46E-05	1.85E-05	-0.289377282	0.123352288	-0.26954193	-0.074535316	105.01	95.27	1.393744984	1.267805608	0.497696053	-0.001468187	2.375663091	NA	1.382254466	1.264823379	1.483867433	-0.786773892
AFG	2013	Afghanistan	1	3	0.914	0.846	0.91	0.453	0.704	0.483	0.192	0.587	1.182	0.806	0.913	0.554	0.339	0.689	0	NA	0	-66	-66	-66	NA	-1.24	-2.52	-1.38	-1.6	-1.44	0.020679036	1.42E-05	1.82E-05	-0.289376468	0.371280598	-0.269589091	-0.074536343	104.08	94.83	1.350492838	1.241610794	0.139115009	-0.001468187	1.435881578	NA	1.289887688	1.197030312	1.351449459	-0.872740914
AFG	2014	Afghanistan	1	3	0.91	0.846	0.897	0.44	0.687	0.483	0.227	0.572	1.182	0.806	0.913	0.547	0.33	0.689	0	NA	0	1	2	-1	-1	-1.14	-2.41	-1.33	-1.45	-1.35	0.021225191	1.41E-05	1.87E-05	-0.289303238	0.619208907	-0.269596206	-0.074534801	96.24	88.9	0.985872599	0.888576141	0.139115009	-0.001468187	1.435881578	-0.797873729	1.276692434	1.197030312	1.308413617	-0.92133097
AFG	2015	Afghanistan	1	3	0.89	0.764	0.897	0.446	0.661	0.433	0.229	0.571	0.984	0.806	0.913	0.545	0.334	0.693	0	NA	0	1	2	-1	-1	-1.12	-2.57	-1.32	-1.5	-1.34	0.177862096	0.000113505	0.000198507	-0.268300754	0.867137216	-0.258054669	-0.074010346	50.75	51.86	-1.129761924	-1.316550929	-0.002599655	-0.001468187	1.435881578	-0.797873729	1.210716164	0.919078738	1.308413617	-0.89890479
AFG	2016	Afghanistan	1	3	0.913	0.795	0.923	0.424	0.659	0.326	0.186	0.522	1.1	0.806	1.4	0.436	0.275	0.705	0	NA	0	1	2	-1	-1	-1.04	-2.67	-1.23	-1.5	-1.53	0.020350157	1.27E-05	2.33E-05	-0.289420566	1.115065526	-0.269761908	-0.074521463	42.81	45.53	-1.499032931	-1.693399049	0.080425097	-0.001468187	1.870519372	-0.797873729	1.286588874	1.024157992	1.3944853	-0.981134116
AFG	2017	Afghanistan	1	3	0.903	0.801	0.911	0.499	0.643	0.367	0.207	0.56	0.756	0.806	0.93	0.406	0.204	0.643	0	NA	0	1	2	-1	-1	-0.99	-2.8	-1.33	-1.57	-1.52	0.020347772	1.23E-05	1.81E-05	-0.289420885	1.362993835	-0.269803202	-0.074536636	52.81	54.28	-1.033956096	-1.172479452	-0.165786238	-0.001468187	1.451053739	-0.797873729	1.253600739	1.044495912	1.354759908	-0.70080687
AFG	2018	Afghanistan	1	3	0.908	0.851	0.859	0.549	0.652	0.349	0.238	0.573	1.434	0.806	1.855	0.421	0.199	0.703	0	NA	0	1	2	-1	-1	-0.99	-2.75	-1.46	-1.67	-1.5	NA	NA	NA	NA	1.610922145	NA	NA	68.35	67.1	-0.311226694	-0.409257826	0.319479127	-0.001468187	2.276597803	-0.797873729	1.270094807	1.213978579	1.182616541	-0.513922039
AGO	2005	Angola	0	0	0.897	0.951	0.901	0.398	0.504	0.604	0.182	0.462	-0.385	-0.135	-0.445	-0.275	-0.729	0.449	0	NA	0	2	4	-2	-2	-1.23	-0.89	-1.14	-1.43	-1.3	NA	NA	NA	NA	-1.612145878	NA	NA	53.39	60.88	-1.00698164	-0.779557242	-0.982434883	-0.950119068	0.223893643	-0.957877923	1.233807858	1.552943913	1.321655414	-1.078314228
AGO	2006	Angola	0	0	0.897	0.951	0.901	0.398	0.504	0.604	0.182	0.462	-0.385	-0.135	-0.445	-0.283	-0.739	0.449	0	NA	0	2	4	-2	-2	-1.25	-0.54	-1.37	-1.3	-1.22	NA	NA	NA	NA	-1.364217568	NA	NA	64.29	71.49	-0.500047889	-0.147905022	-0.982434883	-0.950119068	0.223893643	-0.957877923	1.233807858	1.552943913	1.321655414	-1.078314228
AGO	2007	Angola	0	0	0.897	0.951	0.901	0.434	0.504	0.604	0.182	0.462	-0.385	-0.135	-0.445	-0.272	-0.727	0.48	0	NA	0	2	4	-2	-2	-1.19	-0.67	-1.21	-1.37	-1.29	NA	NA	NA	NA	-1.116289259	NA	NA	71.12	74.52	-0.182400411	0.032481993	-0.982434883	-0.950119068	0.223893643	-0.957877923	1.233807858	1.552943913	1.321655414	-0.94375715
AGO	2008	Angola	0	0	0.897	0.951	0.901	0.434	0.465	0.648	0.181	0.428	-0.385	-0.135	-0.445	-0.181	0.19	0.48	0	NA	0	2	4	-2	-2	-1.12	-0.36	-1.06	-1.37	-1.28	NA	NA	NA	NA	-0.868360949	NA	NA	96.99	94.32	1.020753362	1.211248623	-0.982434883	-0.950119068	0.223893643	-0.957877923	1.233807858	1.552943913	1.321655414	-0.94375715
AGO	2009	Angola	0	0	0.897	0.951	0.901	0.434	0.522	0.648	0.196	0.428	-0.171	-0.135	-0.355	-0.165	0.194	0.52	0	NA	0	2	4	-2	-2	-1.13	-0.35	-0.96	-1.23	-1.4	NA	NA	NA	NA	-0.62043264	NA	NA	61.76	64.02	-0.617712328	-0.592621524	-0.829268529	-0.950119068	0.30421685	-0.957877923	1.233807858	1.552943913	1.321655414	-0.94375715
AGO	2010	Angola	1	3	0.897	0.951	0.901	0.434	0.491	0.609	0.19	0.417	-0.165	-0.021	-0.355	-0.194	0.235	0.431	0	NA	0	2	4	-2	-2	-1.12	-0.23	-1.12	-1.27	-1.33	0.964991498	0.000901861	0.000358866	-0.162759394	-0.372504331	-0.166501312	-0.073542655	79.04	79.04	0.185940443	0.301574173	-0.824974145	-0.835192181	0.30421685	-0.957877923	1.233807858	1.552943913	1.321655414	-0.94375715
AGO	2011	Angola	1	3	0.897	0.951	0.901	0.434	0.471	0.609	0.199	0.417	-0.142	-0.021	-0.216	-0.195	0.237	0.412	0	NA	0	2	4	-2	-2	-1.13	-0.37	-1.15	-1.27	-1.34	1.773293065	0.001616493	0.03283876	-0.054379188	-0.124576021	-0.083509707	0.021185423	104.01	93.67	1.3472373	1.172551738	-0.808512341	-0.835192181	0.428271579	-0.957877923	1.233807858	1.552943913	1.321655414	-0.94375715
AGO	2012	Angola	1	3	0.897	0.951	0.901	0.434	0.471	0.609	0.194	0.417	-0.142	-0.021	-0.216	-0.2	0.255	0.412	0	NA	0	2	4	-2	-2	-1.08	-0.39	-0.99	-1.27	-1.27	2.057246152	0.001825418	0.019973264	-0.016305658	0.123352288	-0.05924686	-0.016336983	105.01	95.27	1.393744984	1.267805608	-0.808512341	-0.835192181	0.428271579	-0.957877923	1.233807858	1.552943913	1.321655414	-0.94375715
AGO	2013	Angola	1	3	0.879	0.931	0.895	0.428	0.531	0.486	0.204	0.453	-0.155	-0.021	0.023	-0.172	0.204	0.485	0	NA	0	2	4	-2	-2	-1.11	-0.39	-1.22	-1.27	-1.31	2.363770055	0.002043016	0.017640075	0.024794255	0.371280598	-0.033976733	-0.023141761	104.08	94.83	1.350492838	1.241610794	-0.817816839	-0.835192181	0.641574316	-0.957877923	1.174429215	1.485150846	1.301792718	-0.966183329
AGO	2014	Angola	1	3	0.878	0.931	0.895	0.428	0.531	0.518	0.212	0.453	-0.155	-0.021	0.023	-0.164	0.207	0.485	0	NA	0	2	4	-2	-2	-1.15	-0.33	-1.12	-1.12	-1.44	1.664038096	0.001390174	0.010208823	-0.069028518	0.619208907	-0.109792616	-0.044815116	96.24	88.9	0.985872599	0.888576141	-0.817816839	-0.835192181	0.641574316	-0.957877923	1.171130401	1.485150846	1.301792718	-0.966183329
AGO	2015	Angola	1	3	0.876	0.931	0.895	0.428	0.531	0.499	0.217	0.453	-0.155	-0.021	0.023	-0.174	0.202	0.485	0	NA	0	2	4	-2	-2	-1.18	-0.5	-1	-1.08	-1.39	0.266265072	0.000213696	0.003803787	-0.256447341	0.867137216	-0.246419289	-0.063495495	50.75	51.86	-1.129761924	-1.316550929	-0.817816839	-0.835192181	0.641574316	-0.957877923	1.164532774	1.485150846	1.301792718	-0.966183329
AGO	2016	Angola	1	3	0.876	0.931	0.895	0.428	0.531	0.472	0.205	0.453	-0.155	-0.021	0.023	-0.171	0.2	0.434	0	NA	0	2	4	-2	-2	-1.14	-0.32	-1.04	-1.09	-1.44	0.460412621	0.000353077	0.065773232	-0.230415285	1.115065526	-0.23023267	0.117239281	42.81	45.53	-1.499032931	-1.693399049	-0.817816839	-0.835192181	0.641574316	-0.957877923	1.164532774	1.485150846	1.301792718	-0.966183329
AGO	2017	Angola	1	3	0.764	0.702	0.818	0.386	0.58	0.524	0.341	0.5	0.119	-0.021	-0.076	-0.052	0.264	0.489	0	NA	0	2	4	-2	-2	-1.1	-0.33	-1.03	-1.1	-1.41	0.480498194	0.000351498	0.005338869	-0.227722134	1.362993835	-0.230416025	-0.059018406	52.81	54.28	-1.033956096	-1.172479452	-0.621706647	-0.835192181	0.553218789	-0.957877923	0.795065662	0.708920231	1.046888117	-1.123166587
AGO	2018	Angola	1	3	0.647	0.526	0.625	0.542	0.622	0.482	0.454	0.621	0.509	-0.021	0.024	0.089	0.272	0.59	0	NA	0	2	4	-2	-2	-0.92	-0.32	-1.05	-1.05	-1.14	NA	NA	NA	NA	1.610922145	NA	NA	68.35	67.1	-0.311226694	-0.409257826	-0.342571703	-0.835192181	0.642466796	-0.957877923	0.409104481	0.112341243	0.407971388	-0.540085916
ALB	2005	Albania	2	5	0.733	0.755	0.432	0.904	0.865	0.865	0.546	0.84	1.057	2.012	-0.976	1.011	0.684	0.803	0.1	1.646	0	9	0	9	9	0	-0.51	-0.66	-0.74	-0.79	NA	NA	NA	NA	-1.612145878	NA	NA	53.39	60.88	-1.00698164	-0.779557242	0.04964868	1.214337299	-0.250013274	0.802168213	0.692802443	0.888571858	-0.23094534	0.812960257
ALB	2006	Albania	2	7	0.733	0.755	0.432	0.904	0.874	0.865	0.546	0.841	2.215	2.012	-0.976	1.052	0.684	0.874	0.1	1.21	0	9	0	9	9	0.08	-0.51	-0.52	-0.68	-0.8	NA	NA	NA	NA	-1.364217568	NA	NA	64.29	71.49	-0.500047889	-0.147905022	0.878464746	1.214337299	-0.250013274	0.802168213	0.692802443	0.888571858	-0.23094534	0.812960257
ALB	2007	Albania	2	7	0.733	0.755	0.432	0.904	0.885	0.865	0.546	0.853	2.215	2.012	-0.976	1.022	0.685	0.874	0.1	1.21	0	9	0	9	9	0.11	-0.2	-0.41	-0.65	-0.69	NA	NA	NA	NA	-1.116289259	NA	NA	71.12	74.52	-0.182400411	0.032481993	0.878464746	1.214337299	-0.250013274	0.802168213	0.692802443	0.888571858	-0.23094534	0.812960257
ALB	2008	Albania	2	6	0.797	0.769	0.679	0.904	0.885	0.865	0.523	0.853	2.215	2.012	-0.976	1.033	0.676	0.874	0.1	1.21	0	9	0	9	9	0.17	-0.03	-0.36	-0.59	-0.59	NA	NA	NA	NA	-0.868360949	NA	NA	96.99	94.32	1.020753362	1.211248623	0.878464746	1.214337299	-0.250013274	0.802168213	0.903926507	0.936027005	0.586735654	0.812960257
ALB	2009	Albania	2	6	0.797	0.769	0.679	0.904	0.889	0.865	0.547	0.847	2.215	2.012	-0.976	1.026	0.691	0.87	0.1	1.21	0	9	0	9	9	0.14	-0.05	-0.26	-0.5	-0.54	NA	NA	NA	NA	-0.62043264	NA	NA	61.76	64.02	-0.617712328	-0.592621524	0.878464746	1.214337299	-0.250013274	0.802168213	0.903926507	0.936027005	0.586735654	0.812960257
ALB	2010	Albania	2	5	0.798	0.769	0.684	0.904	0.884	0.864	0.482	0.828	2.23	2.012	-0.922	1.015	0.698	0.86	0.1	1.191	0	9	0	9	9	0.12	-0.19	-0.28	-0.41	-0.53	0	0	0	-0.292149193	-0.372504331	-0.271236208	-0.074589294	79.04	79.04	0.185940443	0.301574173	0.889200706	1.214337299	-0.20181935	0.802168213	0.907225321	0.936027005	0.603287901	0.812960257
ALB	2011	Albania	2	5	0.798	0.769	0.684	0.904	0.884	0.893	0.482	0.828	2.23	2.012	-0.407	1.01	0.701	0.86	0.1	1.191	0	9	0	9	9	0.06	-0.28	-0.21	-0.46	-0.68	0	0	0	-0.292149193	-0.124576021	-0.271236208	-0.074589294	104.01	93.67	1.3472373	1.172551738	0.889200706	1.214337299	0.257807886	0.802168213	0.907225321	0.936027005	0.603287901	0.812960257
ALB	2012	Albania	2	5	0.786	0.714	0.684	0.904	0.878	0.893	0.531	0.828	1.53	2.012	-1.618	1.014	0.697	0.872	0.1	1.191	0	9	0	9	9	0.02	-0.14	-0.27	-0.52	-0.73	0.34	0.000258555	0.000688259	-0.246560676	0.123352288	-0.241209698	-0.072581976	105.01	95.27	1.393744984	1.267805608	0.388189267	1.214337299	-0.822985478	0.802168213	0.867639559	0.749596071	0.603287901	0.812960257
ALB	2013	Albania	3	8	0.74	0.747	0.612	0.966	0.859	0.883	0.565	0.81	1.696	2.012	-1.238	0.805	0.693	0.807	0.1	1.328	0	9	0	9	9	0.05	0.09	-0.32	-0.52	-0.7	0.19	0.000144928	0.000361217	-0.266673257	0.371280598	-0.254405491	-0.0735358	104.08	94.83	1.350492838	1.241610794	0.507000551	1.214337299	-0.483843052	0.802168213	0.715894137	0.861454631	0.364935546	1.044697447
ALB	2014	Albania	3	8	0.762	0.777	0.612	0.966	0.812	0.88	0.629	0.751	1.71	2.012	-1.238	0.826	0.72	0.801	0.1	1.328	0	9	0	9	9	0.14	0.49	-0.09	-0.34	-0.55	0.13	9.93E-05	0.000232143	-0.27471829	0.619208907	-0.25970286	-0.073912246	96.24	88.9	0.985872599	0.888576141	0.51702078	1.214337299	-0.483843052	0.802168213	0.788468034	0.963144231	0.364935546	1.044697447
ALB	2015	Albania	3	8	0.762	0.777	0.612	0.966	0.816	0.88	0.629	0.751	1.713	2.012	-1.238	0.841	0.718	0.827	0.1	1.328	0	9	0	9	9	0.16	0.35	0.01	-0.33	-0.48	0.06	4.61E-05	0.000143198	-0.284104161	0.867137216	-0.265880392	-0.074171654	50.75	51.86	-1.129761924	-1.316550929	0.519167972	1.214337299	-0.483843052	0.802168213	0.788468034	0.963144231	0.364935546	1.044697447
ALB	2016	Albania	3	8	0.762	0.777	0.612	0.966	0.816	0.88	0.629	0.751	1.713	2.012	-1.238	0.835	0.72	0.821	0.1	1.328	0	9	0	9	9	0.17	0.34	0.01	-0.33	-0.41	0.068119661	5.26E-05	0.000149714	-0.283015445	1.115065526	-0.265132143	-0.074152652	42.81	45.53	-1.499032931	-1.693399049	0.519167972	1.214337299	-0.483843052	0.802168213	0.788468034	0.963144231	0.364935546	1.044697447
ALB	2017	Albania	2	5	0.801	0.828	0.728	0.947	0.834	0.864	0.513	0.825	1.713	2.012	-1.239	0.888	0.796	0.817	0.1	1.319	0	9	0	9	9	0.2	0.38	0.08	-0.4	-0.42	0.070120012	5.42E-05	0.000128425	-0.282747231	1.362993835	-0.264943184	-0.07421474	52.81	54.28	-1.033956096	-1.172479452	0.519167972	1.214337299	-0.484735532	0.802168213	0.917121761	1.136016552	0.748947673	0.973681212
ALB	2018	Albania	3	8	0.807	0.839	0.763	0.945	0.803	0.901	0.5	0.705	1.653	2.012	-0.158	0.872	0.776	0.831	0.1	1.597	0	9	0	9	9	0.21	0.38	0.11	-0.39	-0.52	NA	NA	NA	NA	1.610922145	NA	NA	68.35	67.1	-0.311226694	-0.409257826	0.476224134	1.214337299	0.480035423	0.802168213	0.936914642	1.173302739	0.864813401	0.966205819
AND	2005	Andorra	NA	NA	NA	NA	NA	NA	NA	NA	NA	NA	NA	NA	NA	NA	NA	NA	NA	NA	0	NA	NA	NA	NA	1.53	1.38	1.29	0.98	1.28	NA	NA	NA	NA	-1.612145878	NA	NA	53.39	60.88	-1.00698164	-0.779557242	NA	NA	NA	NA	NA	NA	NA	NA
AND	2006	Andorra	NA	NA	NA	NA	NA	NA	NA	NA	NA	NA	NA	NA	NA	NA	NA	NA	NA	NA	0	NA	NA	NA	NA	1.33	1.35	1.54	0.87	1.26	NA	NA	NA	NA	-1.364217568	NA	NA	64.29	71.49	-0.500047889	-0.147905022	NA	NA	NA	NA	NA	NA	NA	NA
AND	2007	Andorra	NA	NA	NA	NA	NA	NA	NA	NA	NA	NA	NA	NA	NA	NA	NA	NA	NA	NA	0	NA	NA	NA	NA	1.31	1.34	1.51	1.18	1.27	NA	NA	NA	NA	-1.116289259	NA	NA	71.12	74.52	-0.182400411	0.032481993	NA	NA	NA	NA	NA	NA	NA	NA
AND	2008	Andorra	NA	NA	NA	NA	NA	NA	NA	NA	NA	NA	NA	NA	NA	NA	NA	NA	NA	NA	0	NA	NA	NA	NA	1.33	1.34	1.54	1.2	1.29	NA	NA	NA	NA	-0.868360949	NA	NA	96.99	94.32	1.020753362	1.211248623	NA	NA	NA	NA	NA	NA	NA	NA
AND	2009	Andorra	NA	NA	NA	NA	NA	NA	NA	NA	NA	NA	NA	NA	NA	NA	NA	NA	NA	NA	0	NA	NA	NA	NA	1.32	1.3	1.54	1.22	1.33	NA	NA	NA	NA	-0.62043264	NA	NA	61.76	64.02	-0.617712328	-0.592621524	NA	NA	NA	NA	NA	NA	NA	NA
AND	2010	Andorra	NA	NA	NA	NA	NA	NA	NA	NA	NA	NA	NA	NA	NA	NA	NA	NA	NA	NA	0	NA	NA	NA	NA	1.32	1.28	1.52	1.2	1.31	NA	NA	NA	NA	-0.372504331	NA	NA	79.04	79.04	0.185940443	0.301574173	NA	NA	NA	NA	NA	NA	NA	NA
AND	2011	Andorra	NA	NA	NA	NA	NA	NA	NA	NA	NA	NA	NA	NA	NA	NA	NA	NA	NA	NA	0	NA	NA	NA	NA	1.36	1.3	1.5	1.41	1.28	NA	NA	NA	NA	-0.124576021	NA	NA	104.01	93.67	1.3472373	1.172551738	NA	NA	NA	NA	NA	NA	NA	NA
AND	2012	Andorra	NA	NA	NA	NA	NA	NA	NA	NA	NA	NA	NA	NA	NA	NA	NA	NA	NA	NA	0	NA	NA	NA	NA	1.43	1.29	1.53	1.41	1.27	NA	NA	NA	NA	0.123352288	NA	NA	105.01	95.27	1.393744984	1.267805608	NA	NA	NA	NA	NA	NA	NA	NA
AND	2013	Andorra	NA	NA	NA	NA	NA	NA	NA	NA	NA	NA	NA	NA	NA	NA	NA	NA	NA	NA	0	NA	NA	NA	NA	1.41	1.28	1.54	1.41	1.26	NA	NA	NA	NA	0.371280598	NA	NA	104.08	94.83	1.350492838	1.241610794	NA	NA	NA	NA	NA	NA	NA	NA
AND	2014	Andorra	NA	NA	NA	NA	NA	NA	NA	NA	NA	NA	NA	NA	NA	NA	NA	NA	NA	NA	0	NA	NA	NA	NA	1.17	1.29	1.72	1.64	1.23	NA	NA	NA	NA	0.619208907	NA	NA	96.24	88.9	0.985872599	0.888576141	NA	NA	NA	NA	NA	NA	NA	NA
AND	2015	Andorra	NA	NA	NA	NA	NA	NA	NA	NA	NA	NA	NA	NA	NA	NA	NA	NA	NA	NA	0	NA	NA	NA	NA	1.19	1.39	1.79	1.58	1.22	NA	NA	NA	NA	0.867137216	NA	NA	50.75	51.86	-1.129761924	-1.316550929	NA	NA	NA	NA	NA	NA	NA	NA
AND	2016	Andorra	NA	NA	NA	NA	NA	NA	NA	NA	NA	NA	NA	NA	NA	NA	NA	NA	NA	NA	0	NA	NA	NA	NA	1.18	1.41	1.86	1.58	1.23	NA	NA	NA	NA	1.115065526	NA	NA	42.81	45.53	-1.499032931	-1.693399049	NA	NA	NA	NA	NA	NA	NA	NA
AND	2017	Andorra	NA	NA	NA	NA	NA	NA	NA	NA	NA	NA	NA	NA	NA	NA	NA	NA	NA	NA	0	NA	NA	NA	NA	1.16	1.42	1.94	1.6	1.24	NA	NA	NA	NA	1.362993835	NA	NA	52.81	54.28	-1.033956096	-1.172479452	NA	NA	NA	NA	NA	NA	NA	NA
AND	2018	Andorra	NA	NA	NA	NA	NA	NA	NA	NA	NA	NA	NA	NA	NA	NA	NA	NA	NA	NA	0	NA	NA	NA	NA	1.07	1.43	1.94	1.61	1.24	NA	NA	NA	NA	1.610922145	NA	NA	68.35	67.1	-0.311226694	-0.409257826	NA	NA	NA	NA	NA	NA	NA	NA
ARE	2005	United Arab Emirates	0	0	0.134	0.297	0.175	0.661	0.201	0.31	0.654	0.257	-1.181	0.902	-2.035	-0.822	-1.325	0.269	0	-1.852	0	0	8	-8	-8	-0.71	0.88	0.71	0.4	1	NA	NA	NA	NA	-1.612145878	NA	NA	53.39	60.88	-1.00698164	-0.779557242	-1.552156462	0.095312349	-1.195149667	-1.917903088	-1.283186849	-0.663889373	-1.081730829	-0.095300019
ARE	2006	United Arab Emirates	0	0	0.134	0.297	0.175	0.661	0.211	0.274	0.692	0.272	-1.181	0.902	-2.049	-0.634	-0.212	0.269	0	-1.852	0	0	8	-8	-8	-1	0.92	0.94	0.32	0.89	NA	NA	NA	NA	-1.364217568	NA	NA	64.29	71.49	-0.500047889	-0.147905022	-1.552156462	0.095312349	-1.207644388	-1.917903088	-1.283186849	-0.663889373	-1.081730829	-0.095300019
ARE	2007	United Arab Emirates	0	0	0.116	0.297	0.109	0.627	0.24	0.334	0.748	0.288	-0.28	0.902	-2.049	-0.587	-0.211	0.366	0	-1.852	0	0	8	-8	-8	-0.91	0.98	0.92	0.29	1.01	NA	NA	NA	NA	-1.116289259	NA	NA	71.12	74.52	-0.182400411	0.032481993	-0.907283168	0.095312349	-1.207644388	-1.917903088	-1.342565492	-0.663889373	-1.300220487	-0.222381704
ARE	2008	United Arab Emirates	0	0	0.112	0.297	0.109	0.627	0.276	0.334	0.729	0.321	-0.243	0.902	-2.049	-0.576	-0.206	0.41	0	-1.852	0	0	8	-8	-8	-0.91	0.7	0.88	0.42	1.08	NA	NA	NA	NA	-0.868360949	NA	NA	96.99	94.32	1.020753362	1.211248623	-0.880801134	0.095312349	-1.207644388	-1.917903088	-1.355760746	-0.663889373	-1.300220487	-0.222381704
ARE	2009	United Arab Emirates	0	0	0.112	0.297	0.109	0.672	0.294	0.334	0.729	0.324	-0.243	0.902	-2.049	-0.569	-0.208	0.397	0	-1.852	0	0	8	-8	-8	-0.84	0.92	0.99	0.4	0.91	NA	NA	NA	NA	-0.62043264	NA	NA	61.76	64.02	-0.617712328	-0.592621524	-0.880801134	0.095312349	-1.207644388	-1.917903088	-1.355760746	-0.663889373	-1.300220487	-0.054185356
ARE	2010	United Arab Emirates	0	0	0.112	0.297	0.109	0.672	0.271	0.361	0.733	0.285	-0.243	0.902	-2.049	-0.558	-0.208	0.389	0	-1.852	0	0	8	-8	-8	-0.9	0.8	0.9	0.32	0.9	16.54725276	0.005853291	0.015084095	1.926570575	-0.372504331	0.408517819	-0.030596312	79.04	79.04	0.185940443	0.301574173	-0.880801134	0.095312349	-1.207644388	-1.917903088	-1.355760746	-0.663889373	-1.300220487	-0.054185356
ARE	2011	United Arab Emirates	0	0	0.112	0.297	0.109	0.63	0.21	0.332	0.733	0.202	-0.573	0.902	-2.049	-0.528	-0.027	0.371	0	-1.852	0	0	8	-8	-8	-0.9	0.91	1.06	0.5	1.08	19.92215202	0.006922221	0.013316947	2.379090146	-0.124576021	0.532654775	-0.035750228	104.01	93.67	1.3472373	1.172551738	-1.116992241	0.095312349	-1.207644388	-1.917903088	-1.355760746	-0.663889373	-1.300220487	-0.211168614
ARE	2012	United Arab Emirates	0	0	0.112	0.297	0.109	0.689	0.17	0.32	0.759	0.227	-1.639	0.902	-2.049	-0.549	-0.029	0.23	0	-1.852	0	0	8	-8	-8	-1	0.86	1.15	0.54	1.16	21.78075112	0.007505428	0.014291831	2.628298315	0.123352288	0.600383701	-0.032906962	105.01	95.27	1.393744984	1.267805608	-1.879961089	0.095312349	-1.207644388	-1.917903088	-1.355760746	-0.663889373	-1.300220487	0.009355486
ARE	2013	United Arab Emirates	0	0	0.112	0.297	0.109	0.689	0.18	0.32	0.73	0.236	-1.639	0.902	-2.049	-0.518	-0.028	0.23	0	-1.852	0	0	8	-8	-8	-1.02	0.89	1.18	0.62	1.28	16.2297865	0.005579163	0.010531983	1.884003469	0.371280598	0.376682892	-0.043872613	104.08	94.83	1.350492838	1.241610794	-1.879961089	0.095312349	-1.207644388	-1.917903088	-1.355760746	-0.663889373	-1.300220487	0.009355486
ARE	2014	United Arab Emirates	0	0	0.112	0.289	0.112	0.72	0.201	0.305	0.76	0.289	-1.639	0.902	-2.049	-0.488	-0.027	0.253	0	-1.852	0	0	8	-8	-8	-1.06	0.77	1.44	0.65	1.2	13.81296	0.004745091	0.007742691	1.559946007	0.619208907	0.27982044	-0.052007625	96.24	88.9	0.985872599	0.888576141	-1.879961089	0.095312349	-1.207644388	-1.917903088	-1.355760746	-0.691006599	-1.290289139	0.125224081
ARE	2015	United Arab Emirates	0	0	0.112	0.289	0.112	0.722	0.224	0.336	0.742	0.304	-1.639	0.902	-2.049	-0.454	0.028	0.253	0	-1.852	0	0	8	-8	-8	-1.11	0.76	1.51	0.64	1.07	8.969265303	0.003071666	0.005955687	0.910484653	0.867137216	0.08548236	-0.057219446	50.75	51.86	-1.129761924	-1.316550929	-1.879961089	0.095312349	-1.207644388	-1.917903088	-1.355760746	-0.691006599	-1.290289139	0.132699474
ARE	2016	United Arab Emirates	0	0	0.11	0.288	0.11	0.722	0.209	0.355	0.741	0.298	-1.296	0.915	-2.049	-0.45	0.029	0.291	0	-1.852	0	0	8	-8	-8	-1.05	0.56	1.42	0.85	1.17	7.111550848	0.002423841	0.004725283	0.661395101	1.115065526	0.010249214	-0.060807938	42.81	45.53	-1.499032931	-1.693399049	-1.634465484	0.108418047	-1.207644388	-1.917903088	-1.362358373	-0.694396253	-1.296910038	0.132699474
ARE	2017	United Arab Emirates	0	0	0.11	0.288	0.11	0.716	0.186	0.368	0.741	0.235	-1.296	0.915	-2.049	-0.468	0.03	0.382	0	-1.852	0	0	8	-8	-8	-1.1	0.62	1.42	0.8	1.13	7.009181374	0.002371171	0.004587161	0.647669005	1.362993835	0.004132486	-0.061210774	52.81	54.28	-1.033956096	-1.172479452	-1.634465484	0.108418047	-1.207644388	-1.917903088	-1.362358373	-0.694396253	-1.296910038	0.110273295
ARE	2018	United Arab Emirates	0	0	0.111	0.286	0.108	0.71	0.206	0.344	0.729	0.199	-0.796	0.915	-2.002	-0.475	0.026	0.373	0	-1.852	0	0	8	-8	-8	-1.11	0.74	1.43	0.81	1.15	NA	NA	NA	NA	1.610922145	NA	NA	68.35	67.1	-0.311226694	-0.409257826	-1.276600171	0.108418047	-1.165697825	-1.917903088	-1.359059559	-0.701175559	-1.303530936	0.087847115
ARG	2005	Argentina	2	6	0.57	0.582	0.448	0.881	0.936	0.942	0.601	0.927	2.257	1.665	-1.953	1.328	1.268	0.882	0	NA	0	8	0	8	8	0.27	-0.04	-0.12	-0.55	-0.39	NA	NA	NA	NA	-1.612145878	NA	NA	53.39	60.88	-1.00698164	-0.779557242	0.908525432	0.864515986	-1.121966302	0.642164019	0.155095841	0.30216183	-0.17797815	0.726993235
ARG	2006	Argentina	2	6	0.57	0.582	0.448	0.881	0.942	0.937	0.6	0.926	2.274	1.665	-2.177	1.348	1.27	0.903	0	NA	0	8	0	8	8	0.4	0	-0.05	-0.57	-0.34	NA	NA	NA	NA	-1.364217568	NA	NA	64.29	71.49	-0.500047889	-0.147905022	0.920692853	0.864515986	-1.321881837	0.642164019	0.155095841	0.30216183	-0.17797815	0.726993235
ARG	2007	Argentina	2	6	0.57	0.582	0.448	0.881	0.925	0.937	0.575	0.92	2.127	1.665	-2.183	1.305	1.222	0.903	0	NA	0	8	0	8	8	0.45	0.1	-0.02	-0.59	-0.34	NA	NA	NA	NA	-1.116289259	NA	NA	71.12	74.52	-0.182400411	0.032481993	0.815480451	0.864515986	-1.327236718	0.642164019	0.155095841	0.30216183	-0.17797815	0.726993235
ARG	2008	Argentina	2	6	0.57	0.582	0.448	0.881	0.92	0.935	0.577	0.901	1.77	1.665	-2.183	1.275	1.228	0.88	0	NA	0	8	0	8	8	0.36	-0.09	-0.15	-0.68	-0.44	NA	NA	NA	NA	-0.868360949	NA	NA	96.99	94.32	1.020753362	1.211248623	0.559964617	0.864515986	-1.327236718	0.642164019	0.155095841	0.30216183	-0.17797815	0.726993235
ARG	2009	Argentina	2	6	0.57	0.582	0.448	0.881	0.909	0.935	0.577	0.9	1.874	1.665	-2.183	1.255	1.205	0.89	0	NA	0	8	0	8	8	0.28	-0.23	-0.32	-0.68	-0.44	NA	NA	NA	NA	-0.62043264	NA	NA	61.76	64.02	-0.617712328	-0.592621524	0.634400602	0.864515986	-1.327236718	0.642164019	0.155095841	0.30216183	-0.17797815	0.726993235
ARG	2010	Argentina	2	6	0.566	0.572	0.448	0.884	0.902	0.931	0.552	0.87	1.475	1.665	-2.16	1.227	1.205	0.809	0	NA	0	8	0	8	8	0.36	-0.08	-0.16	-0.59	-0.36	8.136533324	0.004497807	0.004517786	0.798828723	-0.372504331	0.251102893	-0.061413105	79.04	79.04	0.185940443	0.301574173	0.348824082	0.864515986	-1.306709676	0.642164019	0.141900587	0.268265296	-0.17797815	0.738206325
ARG	2011	Argentina	2	6	0.566	0.572	0.448	0.884	0.899	0.931	0.585	0.884	1.568	1.665	-2.171	1.246	1.231	0.832	0	NA	0	8	0	8	8	0.34	0.16	-0.12	-0.56	-0.37	12.00308467	0.006595101	0.005672535	1.31727091	-0.124576021	0.494665748	-0.058045263	104.01	93.67	1.3472373	1.172551738	0.415387031	0.864515986	-1.316526957	0.642164019	0.141900587	0.268265296	-0.17797815	0.738206325
ARG	2012	Argentina	2	6	0.566	0.572	0.448	0.884	0.896	0.953	0.585	0.88	1.466	1.665	-2.066	1.239	1.232	0.831	0	NA	0	8	0	8	8	0.3	0.1	-0.24	-0.68	-0.44	11.78824586	0.006434632	0.005550022	1.28846449	0.123352288	0.476030119	-0.058402576	105.01	95.27	1.393744984	1.267805608	0.342382507	0.864515986	-1.222816549	0.642164019	0.141900587	0.268265296	-0.17797815	0.738206325
ARG	2013	Argentina	2	6	0.528	0.604	0.456	0.844	0.888	0.953	0.552	0.88	1.485	1.665	-1.789	1.323	1.326	0.871	0	NA	0	8	0	8	8	0.28	0.07	-0.28	-0.71	-0.43	16.76991494	0.009094314	0.007888013	1.956425983	0.371280598	0.784904154	-0.051583791	104.08	94.83	1.350492838	1.241610794	0.355981389	0.864515986	-0.97559957	0.642164019	0.016545674	0.376734203	-0.151494556	0.588698461
ARG	2014	Argentina	2	6	0.528	0.604	0.456	0.844	0.893	0.953	0.539	0.869	1.485	1.665	-1.789	1.33	1.328	0.854	0	NA	0	8	0	8	8	0.35	-0.01	-0.16	-0.89	-0.54	16.80133595	0.009057324	0.007951413	1.960639034	0.619208907	0.780608433	-0.051398883	96.24	88.9	0.985872599	0.888576141	0.355981389	0.864515986	-0.97559957	0.642164019	0.016545674	0.376734203	-0.151494556	0.588698461
ARG	2015	Argentina	2	6	0.484	0.493	0.393	0.788	0.908	0.946	0.589	0.889	1.455	1.665	-1.789	1.283	1.235	0.865	0	NA	0	9	0	9	9	0.41	0.01	-0.08	-0.77	-0.55	13.43823251	0.007167057	0.006282484	1.509701093	0.867137216	0.561088095	-0.05626634	50.75	51.86	-1.129761924	-1.316550929	0.33450947	0.864515986	-0.97559957	0.802168213	-0.128602121	0.000482682	-0.360052866	0.379387451
ARG	2016	Argentina	2	6	0.461	0.43	0.364	0.826	0.945	0.897	0.735	0.947	2.164	1.665	-0.629	1.367	1.239	0.9	0	NA	0	9	0	9	9	0.49	0.2	0.16	-0.39	-0.28	8.927549505	0.004741131	0.004191338	0.904891237	1.115065526	0.279360543	-0.062365197	42.81	45.53	-1.499032931	-1.693399049	0.841962484	0.864515986	0.059677311	0.802168213	-0.204474832	-0.213065478	-0.456055898	0.521419922
ARG	2017	Argentina	2	6	0.45	0.422	0.36	0.772	0.948	0.905	0.708	0.945	2.341	1.665	-0.641	1.389	1.345	0.9	0	NA	0	9	0	9	9	0.53	0.17	0.15	-0.25	-0.26	9.070248615	0.004788938	0.003902861	0.924024887	1.362993835	0.284912476	-0.063206544	52.81	54.28	-1.033956096	-1.172479452	0.968646805	0.864515986	0.04896755	0.802168213	-0.24076178	-0.240182705	-0.469297695	0.319584305
ARG	2018	Argentina	2	6	0.337	0.385	0.403	0.867	0.936	0.906	0.761	0.929	2.142	1.665	-0.621	1.387	1.363	0.916	0	NA	0	9	0	9	9	0.57	0.02	0.03	-0.24	-0.08	NA	NA	NA	NA	1.610922145	NA	NA	68.35	67.1	-0.311226694	-0.409257826	0.82621641	0.864515986	0.066817151	0.802168213	-0.613527707	-0.365599879	-0.326948372	0.674665483
ARM	2005	Armenia	1	3	0.864	0.819	0.803	0.632	0.75	0.846	0.235	0.671	0.823	-0.268	-0.942	0.255	0.217	0.764	0	-0.511	0	5	0	5	5	-0.59	-0.07	-0.14	-0.4	-0.67	NA	NA	NA	NA	-1.612145878	NA	NA	53.39	60.88	-1.00698164	-0.779557242	-0.117832286	-1.084200436	-0.219668951	0.162151437	1.124947012	1.105509672	0.997231376	-0.203693221
ARM	2006	Armenia	1	3	0.864	0.819	0.803	0.632	0.739	0.846	0.235	0.671	0.817	-0.268	-0.942	0.255	0.213	0.768	0	-0.511	0	5	0	5	5	-0.74	-0.26	-0.25	-0.55	-0.67	NA	NA	NA	NA	-1.364217568	NA	NA	64.29	71.49	-0.500047889	-0.147905022	-0.12212667	-1.084200436	-0.219668951	0.162151437	1.124947012	1.105509672	0.997231376	-0.203693221
ARM	2007	Armenia	1	3	0.864	0.819	0.803	0.632	0.745	0.828	0.235	0.654	0.817	-0.268	0.243	0.25	0.237	0.797	0	-0.511	0	5	0	5	5	-0.76	0.15	-0.38	-0.5	-0.74	NA	NA	NA	NA	-1.116289259	NA	NA	71.12	74.52	-0.182400411	0.032481993	-0.12212667	-1.084200436	0.837919931	0.162151437	1.124947012	1.105509672	0.997231376	-0.203693221
ARM	2008	Armenia	1	3	0.853	0.819	0.76	0.472	0.664	0.808	0.27	0.624	0.469	-0.268	0.734	0.104	0.093	0.701	0	-0.172	0	5	0	5	5	-0.86	-0.01	-0.17	-0.34	-0.71	NA	NA	NA	NA	-0.868360949	NA	NA	96.99	94.32	1.020753362	1.211248623	-0.371200928	-1.084200436	1.276127645	0.162151437	1.088660064	1.105509672	0.854882053	-0.801724679
ARM	2009	Armenia	1	3	0.852	0.819	0.76	0.744	0.711	0.808	0.268	0.645	0.471	-0.567	0.427	0.229	0.174	0.756	0	-0.172	0	5	0	5	5	-0.88	0.23	-0.03	-0.48	-0.62	NA	NA	NA	NA	-0.62043264	NA	NA	61.76	64.02	-0.617712328	-0.592621524	-0.369769467	-1.385631481	1.002136264	0.162151437	1.08536125	1.105509672	0.854882053	0.2149288
ARM	2010	Armenia	1	3	0.845	0.794	0.759	0.799	0.701	0.816	0.255	0.665	1.146	-0.567	0.286	0.247	0.166	0.764	0	-0.172	0	5	0	5	5	-0.85	0.07	-0.18	-0.49	-0.7	0.004709919	3.63E-06	1.69E-06	-0.291517669	-0.372504331	-0.270815136	-0.074584374	79.04	79.04	0.185940443	0.301574173	0.113348706	-1.385631481	0.876296574	0.162151437	1.062269556	1.020768338	0.851571604	0.420502113
ARM	2011	Armenia	1	3	0.845	0.794	0.759	0.796	0.72	0.816	0.26	0.655	1.156	-0.567	-0.419	0.255	0.168	0.816	0	-0.172	0	5	0	5	5	-0.69	-0.06	-0.13	-0.44	-0.66	0.005649649	4.35E-06	1.77E-05	-0.291391667	-0.124576021	-0.270730734	-0.074537641	104.01	93.67	1.3472373	1.172551738	0.120506012	-1.385631481	0.247098125	0.162151437	1.062269556	1.020768338	0.851571604	0.409289023
ARM	2012	Armenia	1	3	0.84	0.794	0.73	0.733	0.687	0.795	0.268	0.678	0.885	-0.567	-0.236	0.329	0.4	0.718	0	-0.172	0	5	0	5	5	-0.57	0.15	-0.04	-0.42	-0.59	0.005808028	4.46E-06	1.60E-05	-0.291370431	0.123352288	-0.270718558	-0.0745425	105.01	95.27	1.393744984	1.267805608	-0.073456987	-1.385631481	0.410421978	0.162151437	1.045775488	1.020768338	0.755568572	0.173814137
ARM	2013	Armenia	1	3	0.856	0.846	0.731	0.815	0.73	0.852	0.255	0.648	0.97	-0.567	-0.2	0.31	0.334	0.775	0	-0.504	0	5	0	5	5	-0.59	0.11	0.07	-0.34	-0.53	0.006371798	4.85E-06	1.62E-05	-0.291294838	0.371280598	-0.270672636	-0.074542127	104.08	94.83	1.350492838	1.241610794	-0.012619884	-1.385631481	0.44255126	0.162151437	1.098556504	1.197030312	0.758879021	0.480305259
ARM	2014	Armenia	1	3	0.856	0.846	0.731	0.814	0.712	0.852	0.263	0.655	0.97	-0.567	-0.1	0.305	0.349	0.716	0	-0.958	0	5	0	5	5	-0.56	-0.3	-0.2	-0.37	-0.52	0.006310486	4.77E-06	1.45E-05	-0.291303059	0.619208907	-0.270682278	-0.074547081	96.24	88.9	0.985872599	0.888576141	-0.012619884	-1.385631481	0.531799267	0.162151437	1.098556504	1.197030312	0.758879021	0.476567562
ARM	2015	Armenia	1	3	0.856	0.851	0.731	0.812	0.727	0.865	0.244	0.652	0.97	-0.567	-0.015	0.317	0.332	0.797	0	-0.958	1	5	0	5	5	-0.54	-0.25	-0.16	-0.39	-0.53	0.006334068	4.76E-06	1.78E-05	-0.291299897	0.867137216	-0.27068355	-0.074537402	50.75	51.86	-1.129761924	-1.316550929	-0.012619884	-1.385631481	0.607660073	0.162151437	1.098556504	1.213978579	0.758879021	0.469092169
ARM	2016	Armenia	1	3	0.855	0.847	0.731	0.8	0.721	0.874	0.268	0.626	0.838	-0.567	-0.228	0.331	0.329	0.798	0	-0.931	0	5	0	5	5	-0.58	-0.66	-0.16	-0.12	-0.57	0.006322461	4.71E-06	1.78E-05	-0.291301453	1.115065526	-0.270688676	-0.074537351	42.81	45.53	-1.499032931	-1.693399049	-0.107096327	-1.385631481	0.417561818	0.162151437	1.095257691	1.200419965	0.758879021	0.42423981
ARM	2017	Armenia	1	3	0.807	0.823	0.702	0.792	0.771	0.873	0.283	0.708	1.133	-0.567	-0.793	0.41	0.441	0.796	0	-0.39	0	5	0	5	5	-0.56	-0.62	-0.1	-0.16	-0.56	0.006673445	4.96E-06	1.55E-05	-0.291254392	1.362993835	-0.270660428	-0.074544135	52.81	54.28	-1.033956096	-1.172479452	0.104044208	-1.385631481	-0.086689421	0.162151437	0.936914642	1.119068285	0.66287599	0.394338237
ARM	2018	Armenia	1	4	0.647	0.447	0.432	0.89	0.839	0.896	0.477	0.768	1.765	1.867	-0.655	1.009	0.74	0.831	0	-0.338	0	7	0	7	7	-0.11	-0.42	-0.02	-0.15	-0.35	NA	NA	NA	NA	1.610922145	NA	NA	68.35	67.1	-0.311226694	-0.409257826	0.556385964	1.068158364	0.036472829	0.482159825	0.409104481	-0.155441371	-0.23094534	0.760632505
ASM	2005	American Samoa	NA	NA	NA	NA	NA	NA	NA	NA	NA	NA	NA	NA	NA	NA	NA	NA	NA	NA	0	NA	NA	NA	NA	0.65	0.75	0.23	1.12	0.8	NA	NA	NA	NA	-1.612145878	NA	NA	53.39	60.88	-1.00698164	-0.779557242	NA	NA	NA	NA	NA	NA	NA	NA
ASM	2006	American Samoa	NA	NA	NA	NA	NA	NA	NA	NA	NA	NA	NA	NA	NA	NA	NA	NA	NA	NA	0	NA	NA	NA	NA	0.55	0.7	0.25	1.08	0.31	NA	NA	NA	NA	-1.364217568	NA	NA	64.29	71.49	-0.500047889	-0.147905022	NA	NA	NA	NA	NA	NA	NA	NA
ASM	2007	American Samoa	NA	NA	NA	NA	NA	NA	NA	NA	NA	NA	NA	NA	NA	NA	NA	NA	NA	NA	0	NA	NA	NA	NA	0.97	0.97	0.49	1.11	0.31	NA	NA	NA	NA	-1.116289259	NA	NA	71.12	74.52	-0.182400411	0.032481993	NA	NA	NA	NA	NA	NA	NA	NA
ASM	2008	American Samoa	NA	NA	NA	NA	NA	NA	NA	NA	NA	NA	NA	NA	NA	NA	NA	NA	NA	NA	0	NA	NA	NA	NA	0.97	0.98	0.51	1.13	0.33	NA	NA	NA	NA	-0.868360949	NA	NA	96.99	94.32	1.020753362	1.211248623	NA	NA	NA	NA	NA	NA	NA	NA
ASM	2009	American Samoa	NA	NA	NA	NA	NA	NA	NA	NA	NA	NA	NA	NA	NA	NA	NA	NA	NA	NA	0	NA	NA	NA	NA	0.96	0.95	0.5	1.13	0.35	NA	NA	NA	NA	-0.62043264	NA	NA	61.76	64.02	-0.617712328	-0.592621524	NA	NA	NA	NA	NA	NA	NA	NA
ASM	2010	American Samoa	NA	NA	NA	NA	NA	NA	NA	NA	NA	NA	NA	NA	NA	NA	NA	NA	NA	NA	0	NA	NA	NA	NA	0.99	0.92	0.49	1.12	0.33	NA	NA	NA	NA	-0.372504331	NA	NA	79.04	79.04	0.185940443	0.301574173	NA	NA	NA	NA	NA	NA	NA	NA
ASM	2011	American Samoa	NA	NA	NA	NA	NA	NA	NA	NA	NA	NA	NA	NA	NA	NA	NA	NA	NA	NA	0	NA	NA	NA	NA	1.01	0.93	0.49	1.1	0.32	NA	NA	NA	NA	-0.124576021	NA	NA	104.01	93.67	1.3472373	1.172551738	NA	NA	NA	NA	NA	NA	NA	NA
ASM	2012	American Samoa	NA	NA	NA	NA	NA	NA	NA	NA	NA	NA	NA	NA	NA	NA	NA	NA	NA	NA	0	NA	NA	NA	NA	1.03	0.95	0.49	1.1	0.31	NA	NA	NA	NA	0.123352288	NA	NA	105.01	95.27	1.393744984	1.267805608	NA	NA	NA	NA	NA	NA	NA	NA
ASM	2013	American Samoa	NA	NA	NA	NA	NA	NA	NA	NA	NA	NA	NA	NA	NA	NA	NA	NA	NA	NA	0	NA	NA	NA	NA	1	0.93	0.49	1.11	0.31	NA	NA	NA	NA	0.371280598	NA	NA	104.08	94.83	1.350492838	1.241610794	NA	NA	NA	NA	NA	NA	NA	NA
ASM	2014	American Samoa	NA	NA	NA	NA	NA	NA	NA	NA	NA	NA	NA	NA	NA	NA	NA	NA	NA	NA	0	NA	NA	NA	NA	NA	1.08	0.44	1.41	1.23	NA	NA	NA	NA	0.619208907	NA	NA	96.24	88.9	0.985872599	0.888576141	NA	NA	NA	NA	NA	NA	NA	NA
ASM	2015	American Samoa	NA	NA	NA	NA	NA	NA	NA	NA	NA	NA	NA	NA	NA	NA	NA	NA	NA	NA	0	NA	NA	NA	NA	NA	1.18	0.49	1.35	1.22	NA	NA	NA	NA	0.867137216	NA	NA	50.75	51.86	-1.129761924	-1.316550929	NA	NA	NA	NA	NA	NA	NA	NA
ASM	2016	American Samoa	NA	NA	NA	NA	NA	NA	NA	NA	NA	NA	NA	NA	NA	NA	NA	NA	NA	NA	0	NA	NA	NA	NA	NA	1.19	0.53	1.34	1.23	NA	NA	NA	NA	1.115065526	NA	NA	42.81	45.53	-1.499032931	-1.693399049	NA	NA	NA	NA	NA	NA	NA	NA
ASM	2017	American Samoa	NA	NA	NA	NA	NA	NA	NA	NA	NA	NA	NA	NA	NA	NA	NA	NA	NA	NA	0	NA	NA	NA	NA	NA	1.22	0.56	1.36	1.84	NA	NA	NA	NA	1.362993835	NA	NA	52.81	54.28	-1.033956096	-1.172479452	NA	NA	NA	NA	NA	NA	NA	NA
ASM	2018	American Samoa	NA	NA	NA	NA	NA	NA	NA	NA	NA	NA	NA	NA	NA	NA	NA	NA	NA	NA	0	NA	NA	NA	NA	NA	1.21	0.55	1.36	1.85	NA	NA	NA	NA	1.610922145	NA	NA	68.35	67.1	-0.311226694	-0.409257826	NA	NA	NA	NA	NA	NA	NA	NA
ATG	2005	Antigua and Barbuda	NA	NA	NA	NA	NA	NA	NA	NA	NA	NA	NA	NA	NA	NA	NA	NA	NA	NA	0	NA	NA	NA	NA	0.53	0.83	0.45	0.67	0.75	NA	NA	NA	NA	-1.612145878	NA	NA	53.39	60.88	-1.00698164	-0.779557242	NA	NA	NA	NA	NA	NA	NA	NA
ATG	2006	Antigua and Barbuda	NA	NA	NA	NA	NA	NA	NA	NA	NA	NA	NA	NA	NA	NA	NA	NA	NA	NA	0	NA	NA	NA	NA	0.63	0.8	0.42	0.93	1.13	NA	NA	NA	NA	-1.364217568	NA	NA	64.29	71.49	-0.500047889	-0.147905022	NA	NA	NA	NA	NA	NA	NA	NA
ATG	2007	Antigua and Barbuda	NA	NA	NA	NA	NA	NA	NA	NA	NA	NA	NA	NA	NA	NA	NA	NA	NA	NA	0	NA	NA	NA	NA	0.54	0.8	0.41	0.91	1.15	NA	NA	NA	NA	-1.116289259	NA	NA	71.12	74.52	-0.182400411	0.032481993	NA	NA	NA	NA	NA	NA	NA	NA
ATG	2008	Antigua and Barbuda	NA	NA	NA	NA	NA	NA	NA	NA	NA	NA	NA	NA	NA	NA	NA	NA	NA	NA	0	NA	NA	NA	NA	0.57	0.81	0.51	0.95	1.29	NA	NA	NA	NA	-0.868360949	NA	NA	96.99	94.32	1.020753362	1.211248623	NA	NA	NA	NA	NA	NA	NA	NA
ATG	2009	Antigua and Barbuda	NA	NA	NA	NA	NA	NA	NA	NA	NA	NA	NA	NA	NA	NA	NA	NA	NA	NA	0	NA	NA	NA	NA	0.59	0.72	0.5	0.98	1.33	NA	NA	NA	NA	-0.62043264	NA	NA	61.76	64.02	-0.617712328	-0.592621524	NA	NA	NA	NA	NA	NA	NA	NA
ATG	2010	Antigua and Barbuda	NA	NA	NA	NA	NA	NA	NA	NA	NA	NA	NA	NA	NA	NA	NA	NA	NA	NA	0	NA	NA	NA	NA	0.5	0.9	0.49	0.96	1.31	0	0	0	-0.292149193	-0.372504331	-0.271236208	-0.074589294	79.04	79.04	0.185940443	0.301574173	NA	NA	NA	NA	NA	NA	NA	NA
ATG	2011	Antigua and Barbuda	NA	NA	NA	NA	NA	NA	NA	NA	NA	NA	NA	NA	NA	NA	NA	NA	NA	NA	0	NA	NA	NA	NA	0.51	0.96	0.49	0.95	1.28	0.009136343	3.18E-06	2.19E-05	-0.290924157	-0.124576021	-0.270867157	-0.074525546	104.01	93.67	1.3472373	1.172551738	NA	NA	NA	NA	NA	NA	NA	NA
ATG	2012	Antigua and Barbuda	NA	NA	NA	NA	NA	NA	NA	NA	NA	NA	NA	NA	NA	NA	NA	NA	NA	NA	0	NA	NA	NA	NA	0.64	0.98	0.49	0.95	1.27	0.009691294	3.35E-06	2.07E-05	-0.290849747	0.123352288	-0.270846637	-0.074529027	105.01	95.27	1.393744984	1.267805608	NA	NA	NA	NA	NA	NA	NA	NA
ATG	2013	Antigua and Barbuda	NA	NA	NA	NA	NA	NA	NA	NA	NA	NA	NA	NA	NA	NA	NA	NA	NA	NA	0	NA	NA	NA	NA	0.62	0.96	0.49	0.84	1.26	0.009543403	3.29E-06	2.12E-05	-0.290869577	0.371280598	-0.270854695	-0.074527441	104.08	94.83	1.350492838	1.241610794	NA	NA	NA	NA	NA	NA	NA	NA
ATG	2014	Antigua and Barbuda	NA	NA	NA	NA	NA	NA	NA	NA	NA	NA	NA	NA	NA	NA	NA	NA	NA	NA	0	NA	NA	NA	NA	0.56	0.98	-0.07	-0.18	0.64	0.00971692	3.33E-06	1.92E-05	-0.290846311	0.619208907	-0.270849622	-0.074533397	96.24	88.9	0.985872599	0.888576141	NA	NA	NA	NA	NA	NA	NA	NA
ATG	2015	Antigua and Barbuda	NA	NA	NA	NA	NA	NA	NA	NA	NA	NA	NA	NA	NA	NA	NA	NA	NA	NA	0	NA	NA	NA	NA	0.59	1	0.23	0.59	0.69	0.008875365	3.03E-06	1.55E-05	-0.29095915	0.867137216	-0.270884788	-0.074543961	50.75	51.86	-1.129761924	-1.316550929	NA	NA	NA	NA	NA	NA	NA	NA
ATG	2016	Antigua and Barbuda	NA	NA	NA	NA	NA	NA	NA	NA	NA	NA	NA	NA	NA	NA	NA	NA	NA	NA	0	NA	NA	NA	NA	0.63	0.88	0.27	0.51	0.69	0.010023344	3.40E-06	1.60E-05	-0.290805225	1.115065526	-0.270841086	-0.07454267	42.81	45.53	-1.499032931	-1.693399049	NA	NA	NA	NA	NA	NA	NA	NA
ATG	2017	Antigua and Barbuda	NA	NA	NA	NA	NA	NA	NA	NA	NA	NA	NA	NA	NA	NA	NA	NA	NA	NA	0	NA	NA	NA	NA	0.61	0.75	0.01	0.44	0.24	0.010147783	3.42E-06	1.55E-05	-0.290788539	1.362993835	-0.270839546	-0.07454397	52.81	54.28	-1.033956096	-1.172479452	NA	NA	NA	NA	NA	NA	NA	NA
ATG	2018	Antigua and Barbuda	NA	NA	NA	NA	NA	NA	NA	NA	NA	NA	NA	NA	NA	NA	NA	NA	NA	NA	0	NA	NA	NA	NA	0.62	0.73	-0.01	0.39	0.28	NA	NA	NA	NA	1.610922145	NA	NA	68.35	67.1	-0.311226694	-0.409257826	NA	NA	NA	NA	NA	NA	NA	NA
AUS	2005	Australia	3	9	0.029	0.038	0.01	0.97	0.971	0.919	0.995	0.969	2.148	1.99	-2.26	1.859	1.505	0.93	0	1.818	0	10	0	10	10	1.51	0.89	1.75	1.72	1.95	NA	NA	NA	NA	-1.612145878	NA	NA	53.39	60.88	-1.00698164	-0.779557242	0.830510794	1.192158426	-1.395957683	0.962172408	-1.629562267	-1.541809588	-1.627954975	1.059648234
AUS	2006	Australia	3	9	0.029	0.038	0.01	0.97	0.971	0.919	0.995	0.969	2.148	1.99	-2.26	1.851	1.504	0.93	0	1.818	0	10	0	10	10	1.38	0.94	1.71	1.77	1.96	NA	NA	NA	NA	-1.364217568	NA	NA	64.29	71.49	-0.500047889	-0.147905022	0.830510794	1.192158426	-1.395957683	0.962172408	-1.629562267	-1.541809588	-1.627954975	1.059648234
AUS	2007	Australia	3	9	0.029	0.038	0.01	0.97	0.971	0.919	0.995	0.969	2.148	1.99	-2.26	1.897	1.592	0.93	0	1.818	0	10	0	10	10	1.37	0.93	1.83	1.76	2.01	NA	NA	NA	NA	-1.116289259	NA	NA	71.12	74.52	-0.182400411	0.032481993	0.830510794	1.192158426	-1.395957683	0.962172408	-1.629562267	-1.541809588	-1.627954975	1.059648234
AUS	2008	Australia	3	9	0.029	0.038	0.01	0.97	0.971	0.922	0.995	0.969	2.148	1.99	-2.26	1.895	1.593	0.93	0	1.818	0	10	0	10	10	1.37	0.96	1.79	1.77	2.04	NA	NA	NA	NA	-0.868360949	NA	NA	96.99	94.32	1.020753362	1.211248623	0.830510794	1.192158426	-1.395957683	0.962172408	-1.629562267	-1.541809588	-1.627954975	1.059648234
AUS	2009	Australia	3	9	0.029	0.038	0.01	0.97	0.971	0.922	0.995	0.969	2.148	1.99	-2.26	1.897	1.596	0.93	0	1.818	0	10	0	10	10	1.38	0.86	1.71	1.74	2.05	NA	NA	NA	NA	-0.62043264	NA	NA	61.76	64.02	-0.617712328	-0.592621524	0.830510794	1.192158426	-1.395957683	0.962172408	-1.629562267	-1.541809588	-1.627954975	1.059648234
AUS	2010	Australia	3	9	0.029	0.038	0.01	0.97	0.973	0.926	0.996	0.973	2.747	1.99	-2.26	2.011	1.778	0.939	0	1.818	0	10	0	10	10	1.42	0.89	1.77	1.76	2.03	0.014578576	1.41E-05	0.000247095	-0.290194442	-0.372504331	-0.269597255	-0.073868639	79.04	79.04	0.185940443	0.301574173	1.25923344	1.192158426	-1.395957683	0.962172408	-1.629562267	-1.541809588	-1.627954975	1.059648234
AUS	2011	Australia	3	9	0.029	0.038	0.01	0.97	0.973	0.926	0.996	0.973	2.747	1.99	-2.26	2.008	1.773	0.939	0	1.818	0	10	0	10	10	1.45	0.94	1.7	1.74	2.04	0.22891232	0.000219897	0.001589669	-0.261455743	-0.124576021	-0.245699193	-0.069953001	104.01	93.67	1.3472373	1.172551738	1.25923344	1.192158426	-1.395957683	0.962172408	-1.629562267	-1.541809588	-1.627954975	1.059648234
AUS	2012	Australia	3	9	0.029	0.038	0.01	0.97	0.973	0.934	0.996	0.973	2.747	1.99	-2.26	2.019	1.77	0.939	0	1.818	0	10	0	10	10	1.5	1	1.62	1.77	1.99	0.001888125	1.79E-06	1.02E-05	-0.291896026	0.123352288	-0.27102817	-0.074559527	105.01	95.27	1.393744984	1.267805608	1.25923344	1.192158426	-1.395957683	0.962172408	-1.629562267	-1.541809588	-1.627954975	1.059648234
AUS	2013	Australia	3	9	0.043	0.047	0.037	0.955	0.95	0.912	0.99	0.947	1.697	1.99	-1.724	1.899	1.592	0.942	0	1.87	0	10	0	10	10	1.44	1.03	1.64	1.78	1.79	0.228549015	0.000215004	0.001190359	-0.261504456	0.371280598	-0.246267401	-0.071117593	104.08	94.83	1.350492838	1.241610794	0.507716281	1.192158426	-0.917588366	0.962172408	-1.583378878	-1.511302708	-1.538572842	1.003582785
AUS	2014	Australia	3	9	0.039	0.039	0.029	0.956	0.957	0.913	0.989	0.95	1.697	1.99	-1.724	1.896	1.598	0.942	0	1.87	0	10	0	10	10	1.36	1.03	1.61	1.92	1.85	0.009205652	8.59E-06	5.55E-05	-0.290914864	0.619208907	-0.270238941	-0.074427556	96.24	88.9	0.985872599	0.888576141	0.507716281	1.192158426	-0.917588366	0.962172408	-1.596574132	-1.538419935	-1.565056437	1.007320481
AUS	2015	Australia	3	9	0.039	0.04	0.028	0.951	0.955	0.89	0.989	0.955	1.471	1.99	-1.58	1.879	1.57	0.919	0	2.003	0	10	0	10	10	1.36	0.88	1.56	1.83	1.88	0.011028363	1.02E-05	8.75E-05	-0.290670468	0.867137216	-0.270052525	-0.074334021	50.75	51.86	-1.129761924	-1.316550929	0.34596116	1.192158426	-0.789071236	0.962172408	-1.596574132	-1.535030282	-1.568366886	0.988631998
AUS	2016	Australia	3	9	0.037	0.032	0.028	0.945	0.953	0.901	0.992	0.955	1.471	1.99	-1.58	1.89	1.586	0.919	0	2.046	0	10	0	10	10	1.35	1.05	1.57	1.76	1.82	0.010994887	1.00E-05	0.000130892	-0.290674956	1.115065526	-0.270071192	-0.074207547	42.81	45.53	-1.499032931	-1.693399049	0.34596116	1.192158426	-0.789071236	0.962172408	-1.603171759	-1.562147508	-1.568366886	0.966205819
AUS	2017	Australia	3	9	0.034	0.037	0.024	0.918	0.936	0.89	0.99	0.928	1.637	1.99	-1.575	1.823	1.581	0.936	0	2.007	0	10	0	10	10	1.38	0.89	1.54	1.68	1.8	0.011072735	9.96E-06	9.30E-05	-0.290664518	1.362993835	-0.270079825	-0.074317917	52.81	54.28	-1.033956096	-1.172479452	0.464772444	1.192158426	-0.784608835	0.962172408	-1.6130682	-1.545199242	-1.581608683	0.86528801
AUS	2018	Australia	3	9	0.045	0.058	0.041	0.926	0.937	0.897	0.989	0.932	1.637	1.99	-2.361	1.787	1.571	0.929	0	1.36	0	10	0	10	10	1.43	0.98	1.6	1.72	1.81	NA	NA	NA	NA	1.610922145	NA	NA	68.35	67.1	-0.311226694	-0.409257826	0.464772444	1.192158426	-1.48609817	0.962172408	-1.576781251	-1.474016521	-1.525331044	0.895189583
AUT	2005	Austria	3	9	0.124	0.213	0.162	0.946	0.968	0.947	0.941	0.98	2.787	1.811	-1.713	1.652	1.389	0.931	0	2.025	0	10	0	10	10	1.38	1.11	1.68	1.86	1.92	NA	NA	NA	NA	-1.612145878	NA	NA	53.39	60.88	-1.00698164	-0.779557242	1.287862665	1.011703052	-0.907771085	0.962172408	-1.316174984	-0.948620253	-1.12476667	0.969943515
AUT	2006	Austria	3	9	0.111	0.154	0.162	0.946	0.968	0.947	0.949	0.98	2.787	1.811	-1.713	1.691	1.461	0.931	0	2.025	0	10	0	10	10	1.37	1.08	1.83	1.91	1.91	NA	NA	NA	NA	-1.364217568	NA	NA	64.29	71.49	-0.500047889	-0.147905022	1.287862665	1.011703052	-0.907771085	0.962172408	-1.359059559	-1.148609801	-1.12476667	0.969943515
AUT	2007	Austria	3	9	0.097	0.101	0.162	0.946	0.968	0.947	0.96	0.98	2.787	1.538	-1.713	1.71	1.467	0.931	0	2.025	0	10	0	10	10	1.37	1.28	1.87	1.96	2.01	NA	NA	NA	NA	-1.116289259	NA	NA	71.12	74.52	-0.182400411	0.032481993	1.287862665	0.736483402	-0.907771085	0.962172408	-1.405242949	-1.328261428	-1.12476667	0.969943515
AUT	2008	Austria	3	9	0.097	0.101	0.162	0.946	0.968	0.951	0.96	0.98	2.787	1.538	-1.713	1.713	1.454	0.931	0	2.025	0	10	0	10	10	1.36	1.34	1.78	1.92	1.84	NA	NA	NA	NA	-0.868360949	NA	NA	96.99	94.32	1.020753362	1.211248623	1.287862665	0.736483402	-0.907771085	0.962172408	-1.405242949	-1.328261428	-1.12476667	0.969943515
AUT	2009	Austria	3	9	0.097	0.101	0.162	0.946	0.968	0.951	0.96	0.98	2.787	1.538	-1.713	1.708	1.452	0.931	0	2.025	0	10	0	10	10	1.39	1.19	1.67	1.78	1.7	NA	NA	NA	NA	-0.62043264	NA	NA	61.76	64.02	-0.617712328	-0.592621524	1.287862665	0.736483402	-0.907771085	0.962172408	-1.405242949	-1.328261428	-1.12476667	0.969943515
AUT	2010	Austria	3	9	0.097	0.101	0.162	0.95	0.963	0.951	0.96	0.969	2.787	1.538	-1.713	1.711	1.478	0.931	0	2.025	0	10	0	10	10	1.43	1.15	1.84	1.8	1.59	0.066221223	2.38E-05	4.29E-05	-0.283269995	-0.372504331	-0.268474844	-0.074464044	79.04	79.04	0.185940443	0.301574173	1.287862665	0.736483402	-0.907771085	0.962172408	-1.405242949	-1.328261428	-1.12476667	0.984894302
AUT	2011	Austria	3	9	0.105	0.129	0.162	0.95	0.967	0.951	0.955	0.975	2.787	1.538	-1.713	1.705	1.481	0.921	0	2.025	0	10	0	10	10	1.4	1.19	1.62	1.8	1.43	0.069506686	2.49E-05	3.84E-05	-0.282829468	-0.124576021	-0.268344074	-0.074477171	104.01	93.67	1.3472373	1.172551738	1.287862665	0.736483402	-0.907771085	0.962172408	-1.378852441	-1.233351134	-1.12476667	0.984894302
AUT	2012	Austria	3	9	0.097	0.098	0.162	0.95	0.967	0.951	0.961	0.975	2.787	1.538	-1.713	1.726	1.471	0.912	0	2.025	0	10	0	10	10	1.45	1.34	1.58	1.86	1.39	0.064243108	2.30E-05	3.59E-05	-0.283535229	0.123352288	-0.268570728	-0.07448462	105.01	95.27	1.393744984	1.267805608	1.287862665	0.736483402	-0.907771085	0.962172408	-1.405242949	-1.338430388	-1.12476667	0.984894302
AUT	2013	Austria	3	9	0.046	0.049	0.054	0.953	0.953	0.935	0.973	0.962	2.17	1.538	-1.328	1.623	1.439	0.911	0	2.088	0	10	0	10	10	1.46	1.36	1.59	1.85	1.55	0.066387028	2.36E-05	3.68E-05	-0.283247764	0.371280598	-0.26849451	-0.074482026	104.08	94.83	1.350492838	1.241610794	0.846256868	0.736483402	-0.564166258	0.962172408	-1.573482438	-1.504523401	-1.482295202	0.996107391
AUT	2014	Austria	3	9	0.046	0.049	0.054	0.953	0.953	0.935	0.973	0.962	2.17	1.538	-1.328	1.629	1.434	0.911	0	2.088	0	10	0	10	10	1.39	1.27	1.57	1.95	1.47	0.066336687	2.35E-05	3.65E-05	-0.283254513	0.619208907	-0.268510161	-0.074482697	96.24	88.9	0.985872599	0.888576141	0.846256868	0.736483402	-0.564166258	0.962172408	-1.573482438	-1.504523401	-1.482295202	0.996107391
AUT	2015	Austria	3	9	0.046	0.049	0.054	0.953	0.953	0.926	0.973	0.962	2.17	1.538	-1.328	1.621	1.435	0.911	0	2.088	0	10	0	10	10	1.38	1.14	1.48	1.86	1.52	0.055453339	1.95E-05	3.62E-05	-0.284713795	0.867137216	-0.268966238	-0.074483656	50.75	51.86	-1.129761924	-1.316550929	0.846256868	0.736483402	-0.564166258	0.962172408	-1.573482438	-1.504523401	-1.482295202	0.996107391
AUT	2016	Austria	3	9	0.046	0.049	0.054	0.953	0.954	0.926	0.973	0.962	2.199	1.538	-1.312	1.546	1.257	0.915	0	2.088	0	10	0	10	10	1.34	0.91	1.51	1.81	1.55	0.055307585	1.94E-05	3.58E-05	-0.284733338	1.115065526	-0.268984901	-0.074484889	42.81	45.53	-1.499032931	-1.693399049	0.867013056	0.736483402	-0.549886577	0.962172408	-1.573482438	-1.504523401	-1.482295202	0.996107391
AUT	2017	Austria	3	9	0.046	0.049	0.054	0.952	0.948	0.899	0.971	0.958	2.199	1.538	-1.312	1.565	1.334	0.899	0	2.101	0	10	0	10	10	1.34	1.05	1.46	1.81	1.53	0.056429208	1.97E-05	3.14E-05	-0.284582947	1.362993835	-0.268945668	-0.074497709	52.81	54.28	-1.033956096	-1.172479452	0.867013056	0.736483402	-0.549886577	0.962172408	-1.573482438	-1.504523401	-1.482295202	0.992369695
AUT	2018	Austria	3	9	0.051	0.068	0.048	0.929	0.89	0.903	0.96	0.894	1.739	1.538	-1.819	1.441	1.329	0.813	0	2.101	0	10	0	10	10	1.38	0.92	1.45	1.88	1.6	NA	NA	NA	NA	1.610922145	NA	NA	68.35	67.1	-0.311226694	-0.409257826	0.537776968	0.736483402	-1.002373972	0.962172408	-1.55698837	-1.440119988	-1.502157899	0.906402673
AZE	2005	Azerbaijan	1	3	0.969	0.942	0.972	0.362	0.28	0.508	0.039	0.252	-0.841	-0.394	-0.655	-0.695	-0.236	0.253	0	-1.657	0	0	7	-7	-7	-1.12	-1.13	-0.73	-0.79	-1.04	NA	NA	NA	NA	-1.612145878	NA	NA	53.39	60.88	-1.00698164	-0.779557242	-1.308808049	-1.21122489	0.036472829	-1.757898894	1.471322431	1.522437033	1.55669732	-1.212871306
AZE	2006	Azerbaijan	1	3	0.969	0.942	0.972	0.409	0.292	0.497	0.039	0.272	-0.841	-0.394	-0.655	-0.683	-0.237	0.253	0	-1.657	0	0	7	-7	-7	-1.28	-1.09	-0.65	-0.89	-1.09	NA	NA	NA	NA	-1.364217568	NA	NA	64.29	71.49	-0.500047889	-0.147905022	-1.308808049	-1.21122489	0.036472829	-1.757898894	1.471322431	1.522437033	1.55669732	-1.037199565
AZE	2007	Azerbaijan	1	3	0.969	0.942	0.972	0.408	0.296	0.535	0.039	0.313	-0.841	-0.596	-0.655	-0.693	-0.234	0.253	0	-1.657	0	0	7	-7	-7	-1.23	-0.63	-0.79	-0.88	-1.12	NA	NA	NA	NA	-1.116289259	NA	NA	71.12	74.52	-0.182400411	0.032481993	-1.308808049	-1.414867268	0.036472829	-1.757898894	1.471322431	1.522437033	1.55669732	-1.040937262
AZE	2008	Azerbaijan	1	3	0.965	0.942	0.962	0.408	0.28	0.524	0.049	0.26	-0.841	-0.567	-0.411	-0.665	-0.158	0.207	0	-1.657	0	0	7	-7	-7	-1.33	-0.33	-0.77	-0.83	-1.15	NA	NA	NA	NA	-0.868360949	NA	NA	96.99	94.32	1.020753362	1.211248623	-1.308808049	-1.385631481	0.254237966	-1.757898894	1.458127177	1.522437033	1.523592826	-1.040937262
AZE	2009	Azerbaijan	1	3	0.966	0.942	0.964	0.43	0.26	0.503	0.042	0.213	-0.863	-0.567	-0.411	-0.679	-0.165	0.205	0	-1.657	0	0	7	-7	-7	-1.26	-0.28	-0.66	-0.88	-1.19	NA	NA	NA	NA	-0.62043264	NA	NA	61.76	64.02	-0.617712328	-0.592621524	-1.324554123	-1.385631481	0.254237966	-1.757898894	1.46142599	1.522437033	1.530213725	-0.958707936
AZE	2010	Azerbaijan	1	3	0.96	0.942	0.942	0.436	0.254	0.556	0.047	0.247	-0.896	-0.608	-0.411	-0.701	-0.214	0.183	0	-1.657	0	0	7	-7	-7	-1.3	-0.24	-0.81	-0.89	-1.24	0.754282878	0.000260817	0.000344736	-0.191012022	-0.372504331	-0.240947018	-0.073583865	79.04	79.04	0.185940443	0.301574173	-1.348173234	-1.426964835	0.254237966	-1.757898894	1.441633109	1.522437033	1.457383838	-0.936281757
AZE	2011	Azerbaijan	1	3	0.96	0.942	0.942	0.477	0.256	0.529	0.053	0.262	-0.934	-0.615	-0.606	-0.687	-0.212	0.246	0	-1.657	0	0	7	-7	-7	-1.3	-0.53	-0.77	-0.89	-1.18	1.796825217	0.000618103	0.000738826	-0.051223906	-0.124576021	-0.199454713	-0.072434496	104.01	93.67	1.3472373	1.172551738	-1.375370997	-1.434021749	0.080204352	-1.757898894	1.441633109	1.522437033	1.457383838	-0.783036195
AZE	2012	Azerbaijan	1	3	0.959	0.942	0.942	0.477	0.275	0.498	0.056	0.236	-0.872	-0.601	-0.974	-0.672	-0.211	0.223	0	-2.21	0	0	7	-7	-7	-1.3	-0.72	-0.78	-0.83	-1.13	2.104955841	0.000719151	0.000845703	-0.009908558	0.123352288	-0.18771977	-0.072122787	105.01	95.27	1.393744984	1.267805608	-1.330995699	-1.419907921	-0.248228313	-1.757898894	1.438334296	1.522437033	1.457383838	-0.783036195
AZE	2013	Azerbaijan	1	3	0.962	0.937	0.945	0.471	0.24	0.513	0.028	0.211	-1.311	-0.597	-0.265	-0.815	-0.311	0.162	0	-0.757	0	0	7	-7	-7	-1.4	-0.41	-0.48	-0.72	-0.97	1.974520819	0.000671834	0.000774322	-0.027397791	0.371280598	-0.193214792	-0.072330973	104.08	94.83	1.350492838	1.241610794	-1.645201444	-1.415875399	0.384540056	-1.757898894	1.448230736	1.505488766	1.467315187	-0.805462375
AZE	2014	Azerbaijan	1	3	0.962	0.937	0.945	0.471	0.237	0.478	0.024	0.198	-1.623	-0.605	-0.814	-0.84	-0.31	0.126	0	-0.757	0	0	7	-7	-7	-1.48	-0.56	-0.36	-0.67	-1.02	0.919170418	0.000309694	0.000358771	-0.168903262	0.619208907	-0.235270895	-0.073542934	96.24	88.9	0.985872599	0.888576141	-1.868509399	-1.423940443	-0.105431502	-1.757898894	1.448230736	1.505488766	1.467315187	-0.805462375
AZE	2015	Azerbaijan	1	3	0.962	0.937	0.945	0.467	0.222	0.511	0.023	0.205	-1.917	-0.605	-0.814	-0.838	-0.294	0.126	0	-0.757	0	0	7	-7	-7	-1.55	-0.73	-0.26	-0.67	-0.93	0.960972349	0.000321611	0.0004388	-0.163298297	0.867137216	-0.233886948	-0.073309527	50.75	51.86	-1.129761924	-1.316550929	-2.078934204	-1.423940443	-0.105431502	-1.757898894	1.448230736	1.505488766	1.467315187	-0.820413162
AZE	2016	Azerbaijan	1	3	0.96	0.954	0.951	0.467	0.233	0.43	0.024	0.182	-1.64	-0.597	-0.73	-0.867	-0.306	0.112	0	-1.234	0	0	7	-7	-7	-1.56	-0.8	-0.17	-0.52	-0.84	1.065779753	0.000355497	0.000613575	-0.149245314	1.115065526	-0.22995166	-0.072799793	42.81	45.53	-1.499032931	-1.693399049	-1.88067682	-1.415875399	-0.030463177	-1.757898894	1.441633109	1.563112873	1.487177883	-0.820413162
AZE	2017	Azerbaijan	1	3	0.964	0.946	0.959	0.535	0.273	0.412	0.033	0.221	-0.788	-0.593	-0.68	-0.765	-0.295	0.24	0	-1.127	0	0	7	-7	-7	-1.57	-0.75	-0.17	-0.56	-0.89	1.13871456	0.000377683	0.000607963	-0.139465933	1.362993835	-0.227375135	-0.072816161	52.81	54.28	-1.033956096	-1.172479452	-1.270874326	-1.411842876	0.014160827	-1.757898894	1.454828363	1.535995646	1.513661478	-0.566249792
AZE	2018	Azerbaijan	1	3	0.951	0.93	0.956	0.512	0.227	0.394	0.022	0.225	-2.159	-0.393	-0.773	-0.953	-0.359	0.098	0	-1.042	0	0	7	-7	-7	-1.5	-0.7	-0.1	-0.6	-0.83	NA	NA	NA	NA	1.610922145	NA	NA	68.35	67.1	-0.311226694	-0.409257826	-2.252141015	-1.210216759	-0.068839819	-1.757898894	1.411943788	1.481761193	1.50373013	-0.652216814
BDI	2005	Burundi	1	3	0.858	0.769	0.805	0.267	0.632	0.511	0.206	0.612	-0.526	1.907	0.854	0.424	0.658	0.467	0	NA	0	7	1	6	6	-0.63	-1.52	-1.25	-1.15	-0.93	NA	NA	NA	NA	-1.612145878	NA	NA	53.39	60.88	-1.00698164	-0.779557242	-1.083352902	1.108483588	1.383225254	0.322155631	1.105154131	0.936027005	1.003852275	-1.567952484
BDI	2006	Burundi	1	3	0.862	0.769	0.827	0.267	0.605	0.548	0.215	0.635	-0.646	1.907	0.854	0.351	0.577	0.494	0	NA	0	7	1	6	6	-0.72	-1.43	-1.1	-0.97	-1.1	NA	NA	NA	NA	-1.364217568	NA	NA	64.29	71.49	-0.500047889	-0.147905022	-1.169240577	1.108483588	1.383225254	0.322155631	1.118349385	0.936027005	1.076682161	-1.567952484
BDI	2007	Burundi	1	3	0.86	0.758	0.826	0.3	0.598	0.548	0.209	0.614	-0.863	1.907	0.854	0.328	0.576	0.472	0	NA	0	7	1	6	6	-0.71	-1.38	-1.27	-1.06	-1.16	NA	NA	NA	NA	-1.116289259	NA	NA	71.12	74.52	-0.182400411	0.032481993	-1.324554123	1.108483588	1.383225254	0.322155631	1.111751758	0.898740818	1.073371712	-1.444608496
BDI	2008	Burundi	1	3	0.872	0.803	0.826	0.3	0.546	0.548	0.187	0.626	-0.863	1.907	0.854	0.326	0.567	0.472	0	NA	0	7	1	6	6	-0.69	-1.64	-1.13	-1.02	-1.09	NA	NA	NA	NA	-0.868360949	NA	NA	96.99	94.32	1.020753362	1.211248623	-1.324554123	1.108483588	1.383225254	0.322155631	1.15133752	1.051275218	1.073371712	-1.444608496
BDI	2009	Burundi	1	3	0.871	0.803	0.83	0.287	0.546	0.562	0.194	0.626	-0.863	1.907	0.854	0.316	0.575	0.472	0	NA	0	7	1	6	6	-0.69	-1.27	-1.05	-1.15	-1.13	NA	NA	NA	NA	-0.62043264	NA	NA	61.76	64.02	-0.617712328	-0.592621524	-1.324554123	1.108483588	1.383225254	0.322155631	1.148038707	1.051275218	1.086613509	-1.493198552
BDI	2010	Burundi	1	3	0.856	0.789	0.802	0.307	0.579	0.514	0.187	0.572	-0.99	1.907	1.017	0.097	0.271	0.42	0	NA	0	7	1	6	6	-0.94	-1.63	-1.1	-1.2	-1.17	0	0	0	-0.292149193	-0.372504331	-0.271236208	-0.074589294	79.04	79.04	0.185940443	0.301574173	-1.415451913	1.108483588	1.528699505	0.322155631	1.098556504	1.003820071	0.993920927	-1.418444619
BDI	2011	Burundi	1	3	0.856	0.789	0.802	0.373	0.541	0.513	0.234	0.597	-0.99	1.907	1.017	0.114	0.289	0.42	0	NA	0	7	1	6	6	-0.93	-1.81	-1.06	-1.14	-1.19	0	0	0	-0.292149193	-0.124576021	-0.271236208	-0.074589294	104.01	93.67	1.3472373	1.172551738	-1.415451913	1.108483588	1.528699505	0.322155631	1.098556504	1.003820071	0.993920927	-1.171756643
BDI	2012	Burundi	1	3	0.861	0.803	0.802	0.373	0.549	0.513	0.24	0.577	-0.99	1.907	1.017	0.114	0.283	0.42	0	NA	0	7	1	6	6	-0.89	-1.7	-1.32	-1.08	-1.45	0	0	0	-0.292149193	0.123352288	-0.271236208	-0.074589294	105.01	95.27	1.393744984	1.267805608	-1.415451913	1.108483588	1.528699505	0.322155631	1.115050572	1.051275218	0.993920927	-1.171756643
BDI	2013	Burundi	1	3	0.887	0.862	0.907	0.26	0.449	0.357	0.122	0.495	-1.234	1.907	1.203	-0.067	0.185	0.348	0	NA	0	7	1	6	6	-0.95	-1.35	-1.06	-1.07	-1.41	0	0	0	-0.292149193	0.371280598	-0.271236208	-0.074589294	104.08	94.83	1.350492838	1.241610794	-1.590090185	1.108483588	1.694700798	0.322155631	1.200819723	1.251264765	1.341518111	-1.59411636
BDI	2014	Burundi	1	3	0.897	0.867	0.937	0.151	0.408	0.351	0.096	0.432	-1.495	1.907	1.507	-0.114	0.17	0.239	0	NA	0	7	1	6	6	-1.04	-0.78	-1.13	-0.97	-1.26	0	0	0	-0.292149193	0.619208907	-0.271236208	-0.074589294	96.24	88.9	0.985872599	0.888576141	-1.776895879	1.108483588	1.966014739	0.322155631	1.233807858	1.268213032	1.440831592	-2.001525291
BDI	2015	Burundi	1	3	0.896	0.867	0.935	0.077	0.258	0.26	0.09	0.23	-2.314	1.907	2.048	-0.74	-0.429	0.151	0	NA	0	2	3	-1	-1	-1.27	-1.94	-1.18	-1.17	-1.26	0	0	0	-0.292149193	0.867137216	-0.271236208	-0.074589294	50.75	51.86	-1.129761924	-1.316550929	-2.363079262	1.108483588	2.448846457	-0.797873729	1.230509045	1.268213032	1.434210693	-2.27811484
BDI	2016	Burundi	1	3	0.952	0.912	0.955	0.044	0.136	0.208	0.046	0.163	-3.22	1.907	0.6	-0.95	-0.442	0.061	0	NA	0	2	3	-1	-1	-1.55	-1.97	-1.44	-1.46	-1.25	0	0	0	-0.292149193	1.115065526	-0.271236208	-0.074589294	42.81	45.53	-1.499032931	-1.693399049	-3.01153121	1.108483588	1.156535316	-0.797873729	1.415242601	1.420747433	1.50041968	-2.401458828
BDI	2017	Burundi	1	3	0.942	0.893	0.943	0.058	0.093	0.276	0.048	0.088	-3.109	1.907	-1.329	-1.075	-0.458	0.046	0	NA	0	2	3	-1	-1	-1.57	-2.01	-1.34	-1.4	-1.28	0	0	0	-0.292149193	1.362993835	-0.271236208	-0.074589294	52.81	54.28	-1.033956096	-1.172479452	-2.932085111	1.108483588	-0.565058738	-0.797873729	1.382254466	1.356344019	1.460694288	-2.349131076
BDI	2018	Burundi	1	3	0.943	0.895	0.95	0.028	0.157	0.312	0.039	0.146	-1.392	1.907	-1.996	-0.955	-0.449	0.132	0	NA	0	2	3	-1	-1	-1.65	-1.6	-1.42	-1.5	-1.45	NA	NA	NA	NA	1.610922145	NA	NA	68.35	67.1	-0.311226694	-0.409257826	-1.703175624	1.108483588	-1.160342945	-0.797873729	1.38555328	1.363123326	1.483867433	-2.461261974
BEL	2005	Belgium	3	9	0.03	0.028	0.024	0.964	0.967	0.953	0.985	0.982	2.848	1.957	-1.022	1.676	1.428	0.926	0	1.166	0	10	0	10	10	1.42	0.8	1.71	1.27	1.39	NA	NA	NA	NA	-1.612145878	NA	NA	53.39	60.88	-1.00698164	-0.779557242	1.331522233	1.158890117	-0.291067357	0.962172408	-1.626263454	-1.575706122	-1.581608683	1.037222054
BEL	2006	Belgium	3	9	0.03	0.028	0.024	0.964	0.967	0.953	0.985	0.982	2.848	1.957	-1.022	1.689	1.483	0.926	0	1.166	0	10	0	10	10	1.34	0.86	1.75	1.24	1.31	NA	NA	NA	NA	-1.364217568	NA	NA	64.29	71.49	-0.500047889	-0.147905022	1.331522233	1.158890117	-0.291067357	0.962172408	-1.626263454	-1.575706122	-1.581608683	1.037222054
BEL	2007	Belgium	3	9	0.03	0.028	0.024	0.964	0.967	0.953	0.985	0.982	2.848	1.957	-1.022	1.766	1.563	0.926	0	1.166	0	8	0	8	8	1.36	0.76	1.61	1.33	1.36	NA	NA	NA	NA	-1.116289259	NA	NA	71.12	74.52	-0.182400411	0.032481993	1.331522233	1.158890117	-0.291067357	0.642164019	-1.626263454	-1.575706122	-1.581608683	1.037222054
BEL	2008	Belgium	3	9	0.03	0.028	0.024	0.964	0.97	0.953	0.983	0.986	2.848	1.957	-1.022	1.768	1.562	0.926	0	1.166	0	8	0	8	8	1.32	0.62	1.39	1.35	1.37	NA	NA	NA	NA	-0.868360949	NA	NA	96.99	94.32	1.020753362	1.211248623	1.331522233	1.158890117	-0.291067357	0.642164019	-1.626263454	-1.575706122	-1.581608683	1.037222054
BEL	2009	Belgium	3	9	0.03	0.028	0.024	0.964	0.97	0.953	0.982	0.986	2.848	1.957	-1.022	1.772	1.566	0.926	0	1.166	0	8	0	8	8	1.35	0.82	1.57	1.38	1.46	NA	NA	NA	NA	-0.62043264	NA	NA	61.76	64.02	-0.617712328	-0.592621524	1.331522233	1.158890117	-0.291067357	0.642164019	-1.626263454	-1.575706122	-1.581608683	1.037222054
BEL	2010	Belgium	3	9	0.03	0.028	0.024	0.964	0.97	0.953	0.982	0.986	2.848	1.957	-1.022	1.769	1.585	0.926	0	1.166	0	8	0	8	8	1.36	0.81	1.58	1.39	1.53	0	0	0	-0.292149193	-0.372504331	-0.271236208	-0.074589294	79.04	79.04	0.185940443	0.301574173	1.331522233	1.158890117	-0.291067357	0.642164019	-1.626263454	-1.575706122	-1.581608683	1.037222054
BEL	2011	Belgium	3	9	0.03	0.028	0.024	0.964	0.97	0.953	0.982	0.986	2.848	1.957	-1.022	1.782	1.585	0.926	0	1.166	0	8	0	8	8	1.33	0.95	1.66	1.42	1.58	0	0	0	-0.292149193	-0.124576021	-0.271236208	-0.074589294	104.01	93.67	1.3472373	1.172551738	1.331522233	1.158890117	-0.291067357	0.642164019	-1.626263454	-1.575706122	-1.581608683	1.037222054
BEL	2012	Belgium	3	9	0.03	0.028	0.024	0.964	0.97	0.953	0.982	0.986	2.848	1.957	-1.022	1.776	1.588	0.926	0	1.166	0	8	0	8	8	1.35	0.92	1.6	1.43	1.61	0	0	0	-0.292149193	0.123352288	-0.271236208	-0.074589294	105.01	95.27	1.393744984	1.267805608	1.331522233	1.158890117	-0.291067357	0.642164019	-1.626263454	-1.575706122	-1.581608683	1.037222054
BEL	2013	Belgium	3	9	0.023	0.019	0.019	0.955	0.967	0.954	0.985	0.98	2.678	1.957	-0.91	1.756	1.599	0.916	0	1.417	0	8	0	8	8	1.37	0.94	1.61	1.44	1.67	0	0	0	-0.292149193	0.371280598	-0.271236208	-0.074589294	104.08	94.83	1.350492838	1.241610794	1.209848026	1.158890117	-0.191109589	0.642164019	-1.649355148	-1.606213002	-1.59816093	1.003582785
BEL	2014	Belgium	3	9	0.023	0.019	0.019	0.955	0.967	0.954	0.985	0.98	2.678	1.957	-0.91	1.749	1.556	0.916	0	1.417	0	8	0	8	8	1.37	0.7	1.38	1.52	1.57	0	0	0	-0.292149193	0.619208907	-0.271236208	-0.074589294	96.24	88.9	0.985872599	0.888576141	1.209848026	1.158890117	-0.191109589	0.642164019	-1.649355148	-1.606213002	-1.59816093	1.003582785
BEL	2015	Belgium	3	9	0.023	0.019	0.019	0.953	0.959	0.925	0.985	0.98	2.596	1.957	-0.885	1.748	1.562	0.91	0	1.417	0	8	0	8	8	1.39	0.59	1.44	1.46	1.57	0	0	0	-0.292149193	0.867137216	-0.271236208	-0.074589294	50.75	51.86	-1.129761924	-1.316550929	1.151158115	1.158890117	-0.168797587	0.642164019	-1.649355148	-1.606213002	-1.59816093	0.996107391
BEL	2016	Belgium	3	9	0.023	0.019	0.019	0.953	0.959	0.925	0.983	0.98	2.596	1.957	-0.885	1.746	1.56	0.91	0	1.417	0	8	0	8	8	1.38	0.44	1.33	1.39	1.64	0	0	0	-0.292149193	1.115065526	-0.271236208	-0.074589294	42.81	45.53	-1.499032931	-1.693399049	1.151158115	1.158890117	-0.168797587	0.642164019	-1.649355148	-1.606213002	-1.59816093	0.996107391
BEL	2017	Belgium	3	9	0.019	0.019	0.021	0.953	0.958	0.929	0.981	0.97	2.547	1.957	-0.905	1.745	1.563	0.916	0	1.417	0	8	0	8	8	1.38	0.43	1.18	1.34	1.5	0	0	0	-0.292149193	1.362993835	-0.271236208	-0.074589294	52.81	54.28	-1.033956096	-1.172479452	1.116087314	1.158890117	-0.186647189	0.642164019	-1.662550402	-1.606213002	-1.591540032	0.996107391
BEL	2018	Belgium	3	9	0.021	0.02	0.029	0.953	0.953	0.928	0.979	0.961	2.46	1.957	-1.029	1.694	1.536	0.911	0	1.505	1	8	0	8	8	1.4	0.41	1.17	1.37	1.51	NA	NA	NA	NA	1.610922145	NA	NA	68.35	67.1	-0.311226694	-0.409257826	1.05381875	1.158890117	-0.297314717	0.642164019	-1.655952775	-1.602823348	-1.565056437	0.996107391
BEN	2005	Benin	2	7	0.628	0.604	0.725	0.841	0.915	0.941	0.619	0.904	2.084	-0.356	-0.513	1.153	0.915	0.924	0	NA	0	6	0	6	6	-0.03	0.45	-0.66	-0.54	-0.85	NA	NA	NA	NA	-1.612145878	NA	NA	53.39	60.88	-1.00698164	-0.779557242	0.784704034	-1.172915927	0.163204999	0.322155631	0.346427024	0.376734203	0.739016325	0.577485371
BEN	2006	Benin	2	7	0.631	0.616	0.727	0.824	0.896	0.941	0.602	0.867	2.084	0.524	-0.513	1.199	1.085	0.924	0	NA	0	7	0	7	7	0.36	0.55	-0.61	-0.53	-0.59	NA	NA	NA	NA	-1.364217568	NA	NA	64.29	71.49	-0.500047889	-0.147905022	0.784704034	-0.285761012	0.163204999	0.482159825	0.356323465	0.417410043	0.745637224	0.513944529
BEN	2007	Benin	2	7	0.631	0.616	0.727	0.842	0.895	0.941	0.602	0.841	2.281	0.524	-0.616	1.181	1.059	0.907	0	NA	0	7	0	7	7	0.37	0.39	-0.53	-0.52	-0.46	NA	NA	NA	NA	-1.116289259	NA	NA	71.12	74.52	-0.182400411	0.032481993	0.925702968	-0.285761012	0.071279551	0.482159825	0.356323465	0.417410043	0.745637224	0.581223068
BEN	2008	Benin	2	7	0.617	0.616	0.674	0.842	0.895	0.941	0.581	0.841	2.281	0.524	-0.616	1.182	1.061	0.927	0	NA	0	7	0	7	7	0.34	0.37	-0.46	-0.53	-0.5	NA	NA	NA	NA	-0.868360949	NA	NA	96.99	94.32	1.020753362	1.211248623	0.925702968	-0.285761012	0.071279551	0.482159825	0.310140076	0.417410043	0.570183407	0.581223068
BEN	2009	Benin	2	7	0.617	0.616	0.674	0.842	0.895	0.941	0.581	0.841	2.281	0.524	-0.616	1.18	1.061	0.927	0	NA	0	7	0	7	7	0.34	0.4	-0.58	-0.65	-0.62	NA	NA	NA	NA	-0.62043264	NA	NA	61.76	64.02	-0.617712328	-0.592621524	0.925702968	-0.285761012	0.071279551	0.482159825	0.310140076	0.417410043	0.570183407	0.581223068
BEN	2010	Benin	2	7	0.617	0.616	0.674	0.842	0.905	0.946	0.606	0.874	2.281	0.523	-0.036	1.19	1.058	0.925	0	NA	0	7	0	7	7	0.31	0.26	-0.59	-0.67	-0.66	0.123185819	4.23E-05	4.94E-05	-0.275631962	-0.372504331	-0.266320122	-0.074445123	79.04	79.04	0.185940443	0.301574173	0.925702968	-0.286769143	0.588917992	0.482159825	0.310140076	0.417410043	0.570183407	0.581223068
BEN	2011	Benin	2	6	0.617	0.616	0.674	0.798	0.908	0.946	0.606	0.849	2.281	0.523	-0.036	1.095	0.887	0.919	0	NA	0	7	0	7	7	0.17	0.32	-0.55	-0.66	-0.59	0.153388089	5.20E-05	5.91E-05	-0.271582324	-0.124576021	-0.265195768	-0.074416901	104.01	93.67	1.3472373	1.172551738	0.925702968	-0.286769143	0.588917992	0.482159825	0.310140076	0.417410043	0.570183407	0.416764417
BEN	2012	Benin	2	6	0.617	0.616	0.674	0.798	0.901	0.941	0.606	0.878	2.281	0.523	-0.036	1.086	0.888	0.917	0	NA	0	7	0	7	7	0.12	0.36	-0.52	-0.59	-0.86	0	0	0	-0.292149193	0.123352288	-0.271236208	-0.074589294	105.01	95.27	1.393744984	1.267805608	0.925702968	-0.286769143	0.588917992	0.482159825	0.310140076	0.417410043	0.570183407	0.416764417
BEN	2013	Benin	3	8	0.541	0.478	0.674	0.838	0.882	0.934	0.673	0.891	1.336	0.523	-1.011	1.136	0.91	0.903	0	NA	0	7	0	7	7	0.16	0.3	-0.49	-0.57	-0.74	0	0	0	-0.292149193	0.371280598	-0.271236208	-0.074589294	104.08	94.83	1.350492838	1.241610794	0.249337525	-0.286769143	-0.281250076	0.482159825	0.059430249	-0.050362118	0.570183407	0.566272281
BEN	2014	Benin	3	8	0.541	0.478	0.674	0.838	0.893	0.934	0.633	0.884	1.336	0.523	-1.011	1.141	0.924	0.903	0	NA	0	7	0	7	7	0.27	0.03	-0.46	-0.49	-0.67	0	0	0	-0.292149193	0.619208907	-0.271236208	-0.074589294	96.24	88.9	0.985872599	0.888576141	0.249337525	-0.286769143	-0.281250076	0.482159825	0.059430249	-0.050362118	0.570183407	0.566272281
BEN	2015	Benin	2	7	0.581	0.626	0.715	0.852	0.903	0.929	0.611	0.899	1.263	0.045	-1.011	1.256	1.032	0.896	0	NA	0	7	0	7	7	0.3	-0.01	-0.62	-0.54	-0.55	0	0	0	-0.292149193	0.867137216	-0.271236208	-0.074589294	50.75	51.86	-1.129761924	-1.316550929	0.197089189	-0.768655563	-0.281250076	0.482159825	0.191382789	0.451306577	0.705911831	0.618600034
BEN	2016	Benin	2	7	0.412	0.375	0.286	0.881	0.933	0.94	0.784	0.908	1.729	-0.175	-0.547	1.351	1.121	0.936	0	NA	0	7	0	7	7	0.41	0	-0.56	-0.61	-0.51	0	0	0	-0.292149193	1.115065526	-0.271236208	-0.074589294	42.81	45.53	-1.499032931	-1.693399049	0.530619662	-0.990444291	0.132860676	0.482159825	-0.366116693	-0.399496412	-0.714270948	0.726993235
BEN	2017	Benin	2	6	0.355	0.122	0.522	0.932	0.915	0.952	0.827	0.889	2.106	-0.175	0.312	1.334	1.147	0.938	0	NA	0	7	0	7	7	0.38	0.03	-0.65	-0.62	-0.55	0	0	0	-0.292149193	1.362993835	-0.271236208	-0.074589294	52.81	54.28	-1.033956096	-1.172479452	0.800450108	-0.990444291	0.899501056	0.482159825	-0.554149063	-1.257078708	0.066995103	0.917615763
BEN	2018	Benin	3	8	0.345	0.15	0.35	0.917	0.877	0.948	0.856	0.841	1.939	-0.175	-0.99	1.274	1.167	0.939	0	NA	0	7	0	7	7	0.27	-0.13	-0.57	-0.68	-0.38	NA	NA	NA	NA	1.610922145	NA	NA	68.35	67.1	-0.311226694	-0.409257826	0.680923093	-0.990444291	-0.262507995	0.482159825	-0.587137199	-1.162168414	-0.502402189	0.861550313
BFA	2005	Burkina Faso	1	4	0.524	0.281	0.667	0.647	0.862	0.859	0.608	0.827	1.74	0.243	0.723	0.818	0.799	0.902	0	1.669	0	2	2	0	0	-0.45	-0.06	-0.58	-0.52	-0.13	NA	NA	NA	NA	-1.612145878	NA	NA	53.39	60.88	-1.00698164	-0.779557242	0.538492698	-0.569045707	1.266310365	-0.637869534	0.003350419	-0.718123826	0.547010262	-0.147627772
BFA	2006	Burkina Faso	2	6	0.524	0.281	0.667	0.646	0.862	0.837	0.599	0.81	1.74	0.243	0.723	0.806	0.801	0.903	0	1.669	0	2	2	0	0	-0.34	0.16	-0.76	-0.43	-0.31	NA	NA	NA	NA	-1.364217568	NA	NA	64.29	71.49	-0.500047889	-0.147905022	0.538492698	-0.569045707	1.266310365	-0.637869534	0.003350419	-0.718123826	0.547010262	-0.151365468
BFA	2007	Burkina Faso	2	5	0.505	0.281	0.667	0.646	0.866	0.858	0.628	0.814	1.74	0.243	0.723	0.777	0.761	0.903	0	1.491	0	2	2	0	0	-0.31	0.31	-0.75	-0.4	-0.33	NA	NA	NA	NA	-1.116289259	NA	NA	71.12	74.52	-0.182400411	0.032481993	0.538492698	-0.569045707	1.266310365	-0.637869534	-0.059327037	-0.718123826	0.547010262	-0.151365468
BFA	2008	Burkina Faso	2	5	0.505	0.281	0.667	0.646	0.865	0.847	0.628	0.798	1.74	0.243	0.723	0.777	0.763	0.919	0	1.338	1	2	2	0	0	-0.28	0.12	-0.49	-0.34	-0.3	NA	NA	NA	NA	-0.868360949	NA	NA	96.99	94.32	1.020753362	1.211248623	0.538492698	-0.569045707	1.266310365	-0.637869534	-0.059327037	-0.718123826	0.547010262	-0.151365468
BFA	2009	Burkina Faso	2	6	0.505	0.281	0.667	0.645	0.857	0.819	0.62	0.801	1.74	0.243	0.723	0.785	0.767	0.911	0	1.338	0	2	2	0	0	-0.29	0.03	-0.59	-0.21	-0.34	NA	NA	NA	NA	-0.62043264	NA	NA	61.76	64.02	-0.617712328	-0.592621524	0.538492698	-0.569045707	1.266310365	-0.637869534	-0.059327037	-0.718123826	0.547010262	-0.155103165
BFA	2010	Burkina Faso	2	6	0.555	0.33	0.653	0.632	0.853	0.834	0.61	0.816	2.411	0.243	1.199	0.733	0.711	0.894	0	1.338	0	2	2	0	0	-0.25	-0.12	-0.57	-0.19	-0.35	0.076573704	0.000125325	2.78E-05	-0.281881895	-0.372504331	-0.256681947	-0.074508142	79.04	79.04	0.185940443	0.301574173	1.018747949	-0.569045707	1.691130878	-0.637869534	0.105613638	-0.552030812	0.50066397	-0.203693221
BFA	2011	Burkina Faso	2	5	0.562	0.33	0.682	0.63	0.838	0.825	0.625	0.806	2.412	-0.189	1.389	0.708	0.694	0.845	0	1.338	0	2	2	0	0	-0.28	-0.56	-0.56	-0.36	-0.37	0.105528939	0.000162352	0.000284445	-0.277999464	-0.124576021	-0.25238193	-0.073759707	104.01	93.67	1.3472373	1.172551738	1.01946368	-1.00455812	1.860702091	-0.637869534	0.128705333	-0.552030812	0.596667002	-0.211168614
BFA	2012	Burkina Faso	2	5	0.578	0.394	0.682	0.591	0.835	0.889	0.575	0.758	1.521	-0.189	1.038	0.77	0.902	0.835	0	1.338	0	2	2	0	0	-0.3	-0.57	-0.62	-0.44	-0.48	0.124099698	0.000180116	0.000312594	-0.275509425	0.123352288	-0.250319025	-0.07367761	105.01	95.27	1.393744984	1.267805608	0.381747691	-1.00455812	1.547441586	-0.637869534	0.181486349	-0.335092999	0.596667002	-0.356938782
BFA	2013	Burkina Faso	2	6	0.472	0.265	0.637	0.642	0.867	0.862	0.675	0.804	1.943	-0.189	1.615	0.96	0.945	0.889	0	1.643	0	2	2	0	0	-0.26	-0.76	-0.66	-0.53	-0.52	0.144948296	0.000200482	0.000312389	-0.272713964	0.371280598	-0.247953874	-0.073678208	104.08	94.83	1.350492838	1.241610794	0.683786016	-1.00455812	2.062402587	-0.637869534	-0.168187883	-0.77235828	0.447696781	-0.166316255
BFA	2014	Burkina Faso	2	7	0.449	0.238	0.665	0.662	0.897	0.858	0.731	0.862	1.97	0.055	1.783	1.088	0.993	0.932	0	1.807	0	2	2	0	0	-0.35	-0.79	-0.58	-0.55	-0.46	0.172575157	0.000229794	0.000347234	-0.269009648	0.619208907	-0.244549805	-0.073576581	96.24	88.9	0.985872599	0.888576141	0.703110743	-0.758574257	2.212339238	-0.637869534	-0.244060594	-0.86387892	0.540389363	-0.091562322
BFA	2015	Burkina Faso	1	3	0.421	0.214	0.612	0.721	0.92	0.879	0.744	0.9	1.949	-0.169	1.585	1.152	1.1	0.941	0	1.477	0	7	1	6	6	-0.11	-0.61	-0.62	-0.52	-0.28	0.262029698	0.000331683	0.000759506	-0.257015236	0.867137216	-0.232717197	-0.072374182	50.75	51.86	-1.129761924	-1.316550929	0.688080399	-0.984395508	2.035628184	0.322155631	-0.336427372	-0.9452306	0.364935546	0.128961778
BFA	2016	Burkina Faso	2	6	0.387	0.226	0.38	0.754	0.896	0.826	0.753	0.888	1.513	0.246	1.654	1.113	1.09	0.86	0	1.862	0	7	1	6	6	0.01	-0.87	-0.56	-0.44	-0.15	0.177864104	0.00021638	0.000466835	-0.268300485	1.115065526	-0.246107614	-0.073227763	42.81	45.53	-1.499032931	-1.693399049	0.376021846	-0.566021315	2.097209309	0.322155631	-0.448587031	-0.90455476	-0.403088708	0.252305766
BFA	2017	Burkina Faso	2	6	0.43	0.405	0.439	0.764	0.91	0.845	0.698	0.935	1.701	0.246	1.461	1.096	1.112	0.902	0	1.877	0	7	1	6	6	0.06	-0.93	-0.58	-0.4	-0.11	0.182552161	0.000215528	0.000368792	-0.267671892	1.362993835	-0.24620653	-0.073513706	52.81	54.28	-1.033956096	-1.172479452	0.510579204	-0.566021315	1.924960656	0.322155631	-0.30673805	-0.297806812	-0.207772195	0.289682732
BFA	2018	Burkina Faso	2	6	0.43	0.384	0.292	0.749	0.906	0.735	0.708	0.888	1.296	0.246	0.886	1.009	1.088	0.844	0	0.407	0	7	1	6	6	-0.04	-1.04	-0.58	-0.45	-0.11	NA	NA	NA	NA	1.610922145	NA	NA	68.35	67.1	-0.311226694	-0.409257826	0.2207083	-0.566021315	1.411784616	0.322155631	-0.30673805	-0.368989532	-0.694408252	0.233617283
BGD	2005	Bangladesh	2	5	0.878	0.789	0.952	0.345	0.725	0.703	0.235	0.658	0.281	0.896	-1.056	0.473	0.714	0.708	0	-0.141	0	6	0	6	6	-0.57	-1.86	-0.91	-0.98	-1.39	NA	NA	NA	NA	-1.612145878	NA	NA	53.39	60.88	-1.00698164	-0.779557242	-0.505758286	0.089263566	-0.321411679	0.322155631	1.171130401	1.003820071	1.490488332	-1.276412148
BGD	2006	Bangladesh	1	4	0.875	0.789	0.952	0.345	0.697	0.743	0.217	0.645	0.281	0.896	-1.056	0.553	0.71	0.708	0	-0.141	0	6	0	6	6	-0.45	-1.51	-0.82	-0.9	-1.43	NA	NA	NA	NA	-1.364217568	NA	NA	64.29	71.49	-0.500047889	-0.147905022	-0.505758286	0.089263566	-0.321411679	0.322155631	1.161233961	1.003820071	1.490488332	-1.276412148
BGD	2007	Bangladesh	0	0	0.81	0.658	0.894	0.307	0.584	0.779	0.271	0.522	-0.095	0.128	-0.893	0.093	-0.695	0.539	0	-0.494	0	0	6	-6	-6	-0.57	-1.54	-0.7	-0.83	-1.06	NA	NA	NA	NA	-1.116289259	NA	NA	71.12	74.52	-0.182400411	0.032481993	-0.774873002	-0.684980724	-0.175937428	-1.597894699	0.946811083	0.559775484	1.298482269	-1.418444619
BGD	2008	Bangladesh	1	3	0.81	0.658	0.894	0.307	0.6	0.779	0.259	0.545	-0.218	0.142	-0.82	0.417	0.779	0.566	0	-0.494	0	0	6	-6	-6	-0.44	-1.51	-0.73	-0.75	-1.03	NA	NA	NA	NA	-0.868360949	NA	NA	96.99	94.32	1.020753362	1.211248623	-0.862907869	-0.670866896	-0.110786383	-1.597894699	0.946811083	0.559775484	1.298482269	-1.418444619
BGD	2009	Bangladesh	2	5	0.881	0.755	0.918	0.268	0.68	0.75	0.203	0.527	1.518	1.094	-1.198	0.516	0.751	0.804	0	-0.137	0	6	1	5	5	-0.29	-1.54	-0.79	-0.79	-1.07	NA	NA	NA	NA	-0.62043264	NA	NA	61.76	64.02	-0.617712328	-0.592621524	0.379600499	0.288873422	-0.448143849	0.162151437	1.181026842	0.888571858	1.377933054	-1.564214787
BGD	2010	Bangladesh	2	5	0.879	0.751	0.918	0.268	0.701	0.725	0.244	0.504	1.358	1.094	-1.1	0.554	0.744	0.88	0	-0.137	0	6	1	5	5	-0.27	-1.43	-0.74	-0.8	-1.06	5.168623708	0.009164226	0.083364899	0.400879901	-0.372504331	0.793023225	0.16854563	79.04	79.04	0.185940443	0.301574173	0.265083599	0.288873422	-0.360680802	0.162151437	1.174429215	0.875013244	1.377933054	-1.564214787
BGD	2011	Bangladesh	2	5	0.878	0.75	0.918	0.282	0.692	0.725	0.232	0.536	1.554	1.094	-0.723	0.53	0.745	0.825	0	-0.137	0	6	1	5	5	-0.32	-1.4	-0.76	-0.73	-1.09	6.37857878	0.011190489	0.060175272	0.563115366	-0.124576021	1.028337047	0.10091275	104.01	93.67	1.3472373	1.172551738	0.405366802	0.288873422	-0.024215816	0.162151437	1.171130401	0.871623591	1.377933054	-1.511887035
BGD	2012	Bangladesh	1	4	0.879	0.75	0.918	0.282	0.642	0.725	0.232	0.535	0.68	1.094	-0.723	0.437	0.726	0.703	0	-0.137	0	6	1	5	5	-0.4	-1.38	-0.8	-0.93	-0.85	8.601203663	0.0147787	0.071084328	0.861133522	0.123352288	1.445043009	0.132729169	105.01	95.27	1.393744984	1.267805608	-0.220181766	0.288873422	-0.024215816	0.162151437	1.174429215	0.871623591	1.377933054	-1.511887035
BGD	2013	Bangladesh	1	4	0.846	0.757	0.909	0.279	0.649	0.662	0.143	0.507	1.347	1.117	-0.497	0.418	0.684	0.833	0	-1.026	1	5	1	4	4	-0.41	-1.63	-0.79	-0.87	-0.89	4.78843579	0.008074934	0.02705331	0.349902832	0.371280598	0.666521563	0.004312072	104.08	94.83	1.350492838	1.241610794	0.257210562	0.312060425	0.17748468	0.002147242	1.065568369	0.895351165	1.348139009	-1.523100124
BGD	2014	Bangladesh	1	3	0.846	0.757	0.909	0.279	0.659	0.662	0.151	0.509	1.236	0.382	-0.484	0.159	0.253	0.853	0	-1.026	0	3	2	1	1	-0.47	-0.9	-0.77	-0.78	-0.89	3.09375198	0.005139123	0.013392866	0.12267306	0.619208907	0.325580125	-0.035528808	96.24	88.9	0.985872599	0.888576141	0.177764463	-0.428915555	0.189086921	-0.47786534	1.065568369	0.895351165	1.348139009	-1.523100124
BGD	2015	Bangladesh	1	3	0.835	0.712	0.878	0.255	0.64	0.685	0.186	0.512	1.364	0.382	-0.665	0.117	0.239	0.818	0	-0.408	0	3	2	1	1	-0.51	-1.21	-0.72	-0.75	-0.81	1.999875776	0.003267771	0.006733588	-0.0239981	0.867137216	0.108256377	-0.054950686	50.75	51.86	-1.129761924	-1.316550929	0.269377983	-0.428915555	0.027548028	-0.47786534	1.029281421	0.742816764	1.245515079	-1.612804843
BGD	2016	Bangladesh	1	3	0.844	0.711	0.904	0.255	0.624	0.726	0.208	0.512	1.193	0.382	-0.665	0.116	0.246	0.808	0	-0.4	0	3	2	1	1	-0.59	-1.26	-0.68	-0.66	-0.86	1.013171776	0.001631517	0.001058696	-0.156299196	1.115065526	-0.081765019	-0.071501592	42.81	45.53	-1.499032931	-1.693399049	0.146988046	-0.428915555	0.027548028	-0.47786534	1.058970742	0.739427111	1.331586762	-1.612804843
BGD	2017	Bangladesh	1	3	0.858	0.73	0.903	0.256	0.616	0.603	0.179	0.446	0.374	0.382	-0.452	0.092	0.26	0.729	0	-1.104	0	3	2	1	1	-0.62	-1.26	-0.73	-0.67	-0.83	1.052920947	0.001647764	0.001029248	-0.150969473	1.362993835	-0.079878216	-0.071587476	52.81	54.28	-1.033956096	-1.172479452	-0.439195338	-0.428915555	0.217646283	-0.47786534	1.105154131	0.803830524	1.328276313	-1.609067147
BGD	2018	Bangladesh	1	3	0.85	0.697	0.9	0.184	0.505	0.609	0.157	0.413	0.112	0.382	-0.58	-0.063	0.124	0.678	0	-1.066	0	0	6	-6	-6	-0.73	-1.03	-0.75	-0.64	-0.91	NA	NA	NA	NA	1.610922145	NA	NA	68.35	67.1	-0.311226694	-0.409257826	-0.626716762	-0.428915555	0.103408834	-1.597894699	1.078763623	0.691971964	1.318344965	-1.878181303
BGR	2005	Bulgaria	2	7	0.394	0.288	0.42	0.946	0.907	0.916	0.826	0.909	2.236	1.937	-2.456	1.379	1.163	0.866	0	2.157	0	9	0	9	9	0.59	0.15	0.18	-0.1	0.06	NA	NA	NA	NA	-1.612145878	NA	NA	53.39	60.88	-1.00698164	-0.779557242	0.893495089	1.138727505	-1.570883777	0.802168213	-0.425495337	-0.694396253	-0.270670733	0.969943515
BGR	2006	Bulgaria	2	7	0.386	0.288	0.387	0.946	0.911	0.916	0.833	0.903	2.231	1.937	-2.467	1.395	1.183	0.872	0	2.157	0	9	0	9	9	0.58	0.4	-0.06	-0.09	-0.07	NA	NA	NA	NA	-1.364217568	NA	NA	64.29	71.49	-0.500047889	-0.147905022	0.889916436	1.138727505	-1.580701057	0.802168213	-0.451885845	-0.694396253	-0.379915562	0.969943515
BGR	2007	Bulgaria	2	7	0.353	0.288	0.366	0.948	0.911	0.905	0.835	0.91	2.245	1.937	-2.467	1.384	1.184	0.85	0	2.157	0	9	0	9	9	0.69	0.36	-0.01	-0.05	-0.18	NA	NA	NA	NA	-1.116289259	NA	NA	71.12	74.52	-0.182400411	0.032481993	0.899936665	1.138727505	-1.580701057	0.802168213	-0.56074669	-0.694396253	-0.449434999	0.977418908
BGR	2008	Bulgaria	2	7	0.361	0.288	0.398	0.944	0.906	0.914	0.828	0.911	2.235	1.937	-2.467	1.38	1.173	0.866	0	2.157	0	9	0	9	9	0.58	0.37	-0.05	-0.11	-0.25	NA	NA	NA	NA	-0.868360949	NA	NA	96.99	94.32	1.020753362	1.211248623	0.892779359	1.138727505	-1.580701057	0.802168213	-0.534356182	-0.694396253	-0.343500619	0.962468122
BGR	2009	Bulgaria	2	6	0.553	0.36	0.566	0.94	0.909	0.909	0.752	0.906	2.239	1.42	-1.857	1.29	1.068	0.872	0.1	2.157	0	9	0	9	9	0.56	0.35	0.17	-0.04	-0.21	NA	NA	NA	NA	-0.62043264	NA	NA	61.76	64.02	-0.617712328	-0.592621524	0.895642281	0.617523993	-1.036288215	0.802168213	0.099016011	-0.450341212	0.212654875	0.947517335
BGR	2010	Bulgaria	2	6	0.589	0.388	0.575	0.935	0.911	0.914	0.72	0.885	2.257	1.42	-1.857	1.299	1.082	0.877	0.1	2.157	0	9	0	9	9	0.53	0.36	0.11	-0.07	-0.19	0	0	0	-0.292149193	-0.372504331	-0.271236208	-0.074589294	79.04	79.04	0.185940443	0.301574173	0.908525432	0.617523993	-1.036288215	0.802168213	0.217773298	-0.355430919	0.24244892	0.928828852
BGR	2011	Bulgaria	2	6	0.588	0.388	0.575	0.931	0.912	0.883	0.698	0.881	2.249	1.42	-1.861	1.265	1.041	0.875	0.1	2.157	0	9	0	9	9	0.45	0.3	0.11	-0.11	-0.22	0	0	0	-0.292149193	-0.124576021	-0.271236208	-0.074589294	104.01	93.67	1.3472373	1.172551738	0.902799587	0.617523993	-1.039858135	0.802168213	0.214474484	-0.355430919	0.24244892	0.913878066
BGR	2012	Bulgaria	2	6	0.559	0.388	0.575	0.864	0.866	0.908	0.734	0.878	1.751	1.42	-1.785	1.22	1.025	0.831	0.1	2.157	0	9	0	9	9	0.4	0.38	0.14	-0.09	-0.23	0	0	0	-0.292149193	0.123352288	-0.271236208	-0.074589294	105.01	95.27	1.393744984	1.267805608	0.546365735	0.617523993	-0.97202965	0.802168213	0.118808892	-0.355430919	0.24244892	0.663452393
BGR	2013	Bulgaria	2	6	0.434	0.283	0.461	0.882	0.855	0.909	0.729	0.838	1.247	1.928	-1.276	1.203	1.114	0.818	0.1	2.157	1	9	0	9	9	0.34	0.17	0.16	-0.1	-0.27	0	0	0	-0.292149193	0.371280598	-0.271236208	-0.074589294	104.08	94.83	1.350492838	1.241610794	0.185637499	1.12965433	-0.517757294	0.802168213	-0.293542796	-0.711344519	-0.134942309	0.730730932
BGR	2014	Bulgaria	2	6	0.432	0.274	0.461	0.885	0.854	0.926	0.773	0.813	1.518	1.928	-1.315	1.258	1.13	0.842	0.1	2.157	0	9	0	9	9	0.37	0.08	0.08	-0.05	-0.25	0	0	0	-0.292149193	0.619208907	-0.271236208	-0.074589294	96.24	88.9	0.985872599	0.888576141	0.379600499	1.12965433	-0.552564017	0.802168213	-0.300140423	-0.7418514	-0.134942309	0.741944022
BGR	2015	Bulgaria	2	6	0.596	0.394	0.546	0.866	0.881	0.912	0.727	0.856	1.462	1.442	-1.353	1.278	1.132	0.869	0.1	2.37	0	9	0	9	9	0.43	0.02	0.21	-0.1	-0.26	0	0	0	-0.292149193	0.867137216	-0.271236208	-0.074589294	50.75	51.86	-1.129761924	-1.316550929	0.339519584	0.639702866	-0.58647826	0.802168213	0.240864992	-0.335092999	0.146445888	0.670927786
BGR	2016	Bulgaria	2	6	0.596	0.394	0.546	0.863	0.865	0.878	0.713	0.824	1.475	1.442	-1.353	1.331	1.238	0.846	0.9	2.37	0	9	0	9	9	0.4	0.08	0.3	-0.06	-0.17	0	0	0	-0.292149193	1.115065526	-0.271236208	-0.074589294	42.81	45.53	-1.499032931	-1.693399049	0.348824082	0.639702866	-0.58647826	0.802168213	0.240864992	-0.335092999	0.146445888	0.659714696
BGR	2017	Bulgaria	2	6	0.604	0.404	0.576	0.862	0.834	0.9	0.68	0.781	1.474	1.442	-1.074	1.211	1.109	0.855	0.9	2.382	0	9	0	9	9	0.38	0.33	0.26	-0.04	-0.16	0	0	0	-0.292149193	1.362993835	-0.271236208	-0.074589294	52.81	54.28	-1.033956096	-1.172479452	0.348108352	0.639702866	-0.33747632	0.802168213	0.2672555	-0.301196465	0.245759369	0.655977
BGR	2018	Bulgaria	2	6	0.642	0.467	0.592	0.878	0.83	0.888	0.638	0.742	1.023	1.442	-1.174	1.212	1.116	0.869	0.9	2.382	0	9	0	9	9	0.32	0.42	0.27	-0.03	-0.15	NA	NA	NA	NA	1.610922145	NA	NA	68.35	67.1	-0.311226694	-0.409257826	0.025313839	0.639702866	-0.426724327	0.802168213	0.392610413	-0.087648305	0.298726559	0.715780146
BHR	2005	Bahrain	0	0	0.715	0.677	0.516	0.57	0.511	0.427	0.206	0.52	0.302	-0.155	-0.232	-0.106	0.293	0.6	0	-0.885	0	0	7	-7	-7	-0.74	0.01	0.4	0.61	0.39	NA	NA	NA	NA	-1.612145878	NA	NA	53.39	60.88	-1.00698164	-0.779557242	-0.490727943	-0.97028168	0.413991898	-1.757898894	0.6334238	0.624178897	0.047132407	-0.435430411
BHR	2006	Bahrain	0	0	0.715	0.677	0.516	0.57	0.515	0.427	0.206	0.52	0.169	-0.155	-0.232	-0.053	0.305	0.572	0	-0.885	0	0	7	-7	-7	-0.9	-0.37	0.4	0.38	0.19	NA	NA	NA	NA	-1.364217568	NA	NA	64.29	71.49	-0.500047889	-0.147905022	-0.585920116	-0.97028168	0.413991898	-1.757898894	0.6334238	0.624178897	0.047132407	-0.435430411
BHR	2007	Bahrain	0	0	0.715	0.677	0.516	0.503	0.497	0.427	0.206	0.52	0.009	-0.155	-0.232	-0.054	0.306	0.575	0	-0.885	0	0	7	-7	-7	-0.86	-0.25	0.41	0.53	0.18	NA	NA	NA	NA	-1.116289259	NA	NA	71.12	74.52	-0.182400411	0.032481993	-0.700437016	-0.97028168	0.413991898	-1.757898894	0.6334238	0.624178897	0.047132407	-0.685856084
BHR	2008	Bahrain	0	0	0.715	0.677	0.516	0.503	0.497	0.427	0.206	0.52	0.009	-0.155	-0.232	-0.048	0.3	0.575	0	-0.885	0	0	7	-7	-7	-0.87	-0.24	0.39	0.53	0.19	NA	NA	NA	NA	-0.868360949	NA	NA	96.99	94.32	1.020753362	1.211248623	-0.700437016	-0.97028168	0.413991898	-1.757898894	0.6334238	0.624178897	0.047132407	-0.685856084
BHR	2009	Bahrain	0	0	0.715	0.677	0.516	0.503	0.49	0.424	0.206	0.485	0.009	-0.155	-0.232	-0.05	0.302	0.575	0	-0.885	0	0	7	-7	-7	-0.79	-0.14	0.48	0.52	0.19	NA	NA	NA	NA	-0.62043264	NA	NA	61.76	64.02	-0.617712328	-0.592621524	-0.700437016	-0.97028168	0.413991898	-1.757898894	0.6334238	0.624178897	0.047132407	-0.685856084
BHR	2010	Bahrain	0	0	0.715	0.681	0.516	0.421	0.476	0.439	0.222	0.409	0.009	-0.137	-0.232	-0.108	0.24	0.575	0	-0.885	0	1	6	-5	-5	-0.97	-0.49	0.46	0.44	0.18	1.098088121	0.002983935	0.000841447	-0.144913283	-0.372504331	0.075293978	-0.072135202	79.04	79.04	0.185940443	0.301574173	-0.700437016	-0.952135329	0.413991898	-1.437890505	0.6334238	0.637737511	0.047132407	-0.992347206
BHR	2011	Bahrain	0	0	0.716	0.678	0.516	0.285	0.406	0.158	0.103	0.368	-1.596	-0.289	1.862	-0.491	0.235	0.536	0	-0.885	0	0	8	-8	-8	-1.22	-0.95	0.52	0.35	0.22	1.430319441	0.003531653	0.001016574	-0.10036642	-0.124576021	0.138901515	-0.071624441	104.01	93.67	1.3472373	1.172551738	-1.849184672	-1.105371178	2.282845164	-1.917903088	0.636722613	0.627568551	0.047132407	-1.500673945
BHR	2012	Bahrain	0	0	0.719	0.688	0.516	0.162	0.148	0.162	0.103	0.111	-1.925	-0.301	1.763	-0.534	0.226	0.157	0	-0.885	0	0	10	-10	-10	-1.32	-1.13	0.55	0.26	0.37	2.269193814	0.005402842	0.001443508	0.012113106	0.123352288	0.356206386	-0.070379283	105.01	95.27	1.393744984	1.267805608	-2.084660049	-1.117468745	2.194489637	-2.237911476	0.646619054	0.661465084	0.047132407	-1.960410628
BHR	2013	Bahrain	0	0	0.719	0.688	0.516	0.162	0.133	0.137	0.112	0.099	-2.248	-0.301	1.395	-0.563	0.234	0.107	0	-0.885	0	0	10	-10	-10	-1.32	-1.34	0.59	0.33	0.43	2.276206796	0.005244716	0.001401605	0.013053434	0.371280598	0.337842872	-0.070501492	104.08	94.83	1.350492838	1.241610794	-2.315841041	-1.117468745	1.866056971	-2.237911476	0.646619054	0.661465084	0.047132407	-1.960410628
BHR	2014	Bahrain	0	0	0.719	0.688	0.516	0.162	0.133	0.153	0.136	0.099	-2.248	-0.301	1.215	-0.662	0.029	0.107	0	-0.885	0	0	10	-10	-10	-1.31	-0.91	0.57	0.41	0.28	2.086960672	0.004576668	0.001268669	-0.01232142	0.619208907	0.260261161	-0.070889202	96.24	88.9	0.985872599	0.888576141	-2.315841041	-1.117468745	1.705410559	-2.237911476	0.646619054	0.661465084	0.047132407	-1.960410628
BHR	2015	Bahrain	0	0	0.719	0.688	0.516	0.226	0.098	0.153	0.136	0.072	-2.652	-0.301	1.215	-0.705	0.017	0.108	0	-0.885	0	0	10	-10	-10	-1.31	-1.07	0.56	0.43	0.14	1.517659475	0.003116344	0.000958724	-0.08865553	0.867137216	0.090670867	-0.071793162	50.75	51.86	-1.129761924	-1.316550929	-2.604996214	-1.117468745	1.705410559	-2.237911476	0.646619054	0.661465084	0.047132407	-1.721198045
BHR	2016	Bahrain	0	0	0.719	0.688	0.516	0.226	0.083	0.153	0.107	0.068	-2.637	-0.301	0.395	-0.753	0.01	0.071	0	-0.885	0	0	10	-10	-10	-1.37	-0.79	0.33	0.46	-0.02	0.967732582	0.001850349	0.000598474	-0.162391859	1.115065526	-0.056351569	-0.072843835	42.81	45.53	-1.499032931	-1.693399049	-2.594260255	-1.117468745	0.973576902	-2.237911476	0.646619054	0.661465084	0.047132407	-1.721198045
BHR	2017	Bahrain	0	0	0.719	0.688	0.516	0.114	0.046	0.153	0.106	0.029	-2.637	-0.301	0.395	-0.846	0.008	0.064	0	-0.885	0	0	10	-10	-10	-1.39	-0.96	0.19	0.45	-0.14	1.062551078	0.00186086	0.000631343	-0.149678228	1.362993835	-0.055130914	-0.072747971	52.81	54.28	-1.033956096	-1.172479452	-2.594260255	-1.117468745	0.973576902	-2.237911476	0.646619054	0.661465084	0.047132407	-2.139820065
BHR	2018	Bahrain	0	0	0.719	0.688	0.516	0.115	0.035	0.166	0.108	0.03	-3.038	-0.301	-0.451	-0.976	-0.145	0.034	0	-0.885	0	0	10	-10	-10	-1.41	-0.84	0.18	0.41	-0.15	NA	NA	NA	NA	1.610922145	NA	NA	68.35	67.1	-0.311226694	-0.409257826	-2.881268236	-1.117468745	0.218538763	-2.237911476	0.646619054	0.661465084	0.047132407	-2.136082369
BHS	2005	Bahamas	NA	NA	NA	NA	NA	NA	NA	NA	NA	NA	NA	NA	NA	NA	NA	NA	NA	NA	0	NA	NA	NA	NA	0.94	0.94	1.21	1.38	1.34	NA	NA	NA	NA	-1.612145878	NA	NA	53.39	60.88	-1.00698164	-0.779557242	NA	NA	NA	NA	NA	NA	NA	NA
BHS	2006	Bahamas	NA	NA	NA	NA	NA	NA	NA	NA	NA	NA	NA	NA	NA	NA	NA	NA	NA	NA	0	NA	NA	NA	NA	1.02	0.81	1.17	1.09	1.35	NA	NA	NA	NA	-1.364217568	NA	NA	64.29	71.49	-0.500047889	-0.147905022	NA	NA	NA	NA	NA	NA	NA	NA
BHS	2007	Bahamas	NA	NA	NA	NA	NA	NA	NA	NA	NA	NA	NA	NA	NA	NA	NA	NA	NA	NA	0	NA	NA	NA	NA	1.1	0.73	1.11	1.27	1.34	NA	NA	NA	NA	-1.116289259	NA	NA	71.12	74.52	-0.182400411	0.032481993	NA	NA	NA	NA	NA	NA	NA	NA
BHS	2008	Bahamas	NA	NA	NA	NA	NA	NA	NA	NA	NA	NA	NA	NA	NA	NA	NA	NA	NA	NA	0	NA	NA	NA	NA	1.12	0.77	1.15	1.2	1.34	NA	NA	NA	NA	-0.868360949	NA	NA	96.99	94.32	1.020753362	1.211248623	NA	NA	NA	NA	NA	NA	NA	NA
BHS	2009	Bahamas	NA	NA	NA	NA	NA	NA	NA	NA	NA	NA	NA	NA	NA	NA	NA	NA	NA	NA	0	NA	NA	NA	NA	1.01	0.86	1.01	0.8	1.37	NA	NA	NA	NA	-0.62043264	NA	NA	61.76	64.02	-0.617712328	-0.592621524	NA	NA	NA	NA	NA	NA	NA	NA
BHS	2010	Bahamas	NA	NA	NA	NA	NA	NA	NA	NA	NA	NA	NA	NA	NA	NA	NA	NA	NA	NA	0	NA	NA	NA	NA	0.99	0.99	1.08	0.72	1.35	0	0	0	-0.292149193	-0.372504331	-0.271236208	-0.074589294	79.04	79.04	0.185940443	0.301574173	NA	NA	NA	NA	NA	NA	NA	NA
BHS	2011	Bahamas	NA	NA	NA	NA	NA	NA	NA	NA	NA	NA	NA	NA	NA	NA	NA	NA	NA	NA	0	NA	NA	NA	NA	0.96	1.1	0.98	0.62	1.35	0.050352276	3.09E-05	0.000161904	-0.285397765	-0.124576021	-0.267653176	-0.074117097	104.01	93.67	1.3472373	1.172551738	NA	NA	NA	NA	NA	NA	NA	NA
BHS	2012	Bahamas	NA	NA	NA	NA	NA	NA	NA	NA	NA	NA	NA	NA	NA	NA	NA	NA	NA	NA	0	NA	NA	NA	NA	0.93	1.18	0.99	0.62	1.32	0.0536025	3.25E-05	0.000144872	-0.284961963	0.123352288	-0.267465788	-0.074166773	105.01	95.27	1.393744984	1.267805608	NA	NA	NA	NA	NA	NA	NA	NA
BHS	2013	Bahamas	NA	NA	NA	NA	NA	NA	NA	NA	NA	NA	NA	NA	NA	NA	NA	NA	NA	NA	0	NA	NA	NA	NA	0.92	1.13	0.87	0.64	1.34	0.053138	3.19E-05	0.000148846	-0.285024245	0.371280598	-0.267532115	-0.074155182	104.08	94.83	1.350492838	1.241610794	NA	NA	NA	NA	NA	NA	NA	NA
BHS	2014	Bahamas	NA	NA	NA	NA	NA	NA	NA	NA	NA	NA	NA	NA	NA	NA	NA	NA	NA	NA	0	NA	NA	NA	NA	1.05	0.96	0.73	0.67	1.31	0.054230732	3.23E-05	0.000141595	-0.284877727	0.619208907	-0.267485213	-0.074176331	96.24	88.9	0.985872599	0.888576141	NA	NA	NA	NA	NA	NA	NA	NA
BHS	2015	Bahamas	NA	NA	NA	NA	NA	NA	NA	NA	NA	NA	NA	NA	NA	NA	NA	NA	NA	NA	0	NA	NA	NA	NA	0.95	0.91	0.71	0.6	1.14	0.056416196	3.32E-05	0.000126211	-0.284584691	0.867137216	-0.267382253	-0.074221198	50.75	51.86	-1.129761924	-1.316550929	NA	NA	NA	NA	NA	NA	NA	NA
BHS	2016	Bahamas	NA	NA	NA	NA	NA	NA	NA	NA	NA	NA	NA	NA	NA	NA	NA	NA	NA	NA	0	NA	NA	NA	NA	0.85	0.98	0.72	0.26	1.11	0.053847599	3.13E-05	0.000116553	-0.284929099	1.115065526	-0.267604718	-0.074249364	42.81	45.53	-1.499032931	-1.693399049	NA	NA	NA	NA	NA	NA	NA	NA
BHS	2017	Bahamas	NA	NA	NA	NA	NA	NA	NA	NA	NA	NA	NA	NA	NA	NA	NA	NA	NA	NA	0	NA	NA	NA	NA	0.85	0.99	0.58	0.19	1.17	0.053920773	3.08E-05	0.000112569	-0.284919287	1.362993835	-0.267657965	-0.074260983	52.81	54.28	-1.033956096	-1.172479452	NA	NA	NA	NA	NA	NA	NA	NA
BHS	2018	Bahamas	NA	NA	NA	NA	NA	NA	NA	NA	NA	NA	NA	NA	NA	NA	NA	NA	NA	NA	0	NA	NA	NA	NA	0.8	0.87	0.54	0.1	1.13	NA	NA	NA	NA	1.610922145	NA	NA	68.35	67.1	-0.311226694	-0.409257826	NA	NA	NA	NA	NA	NA	NA	NA
BIH	2005	Bosnia and Herzegovina	2	6	0.671	0.573	0.654	0.889	0.869	0.883	0.566	0.806	1.999	0.622	-1.359	1.11	1.147	0.917	0	0.759	0	-66	-66	-66	NA	0.21	-0.5	-0.76	-0.52	-0.24	NA	NA	NA	NA	-1.612145878	NA	NA	53.39	60.88	-1.00698164	-0.779557242	0.723866931	-0.186964215	-0.59183314	NA	0.488276005	0.27165495	0.50397442	0.756894808
BIH	2006	Bosnia and Herzegovina	2	6	0.671	0.573	0.654	0.889	0.869	0.887	0.536	0.806	1.999	0.622	-1.337	1.002	0.948	0.897	0	0.759	0	-66	-66	-66	NA	0.19	-0.44	-0.62	-0.5	-0.3	NA	NA	NA	NA	-1.364217568	NA	NA	64.29	71.49	-0.500047889	-0.147905022	0.723866931	-0.186964215	-0.572198579	NA	0.488276005	0.27165495	0.50397442	0.756894808
BIH	2007	Bosnia and Herzegovina	2	6	0.671	0.573	0.654	0.848	0.869	0.866	0.536	0.806	1.999	0.622	-1.347	0.993	0.949	0.897	0	0.759	0	-66	-66	-66	NA	0.13	-0.63	-0.84	-0.47	-0.38	NA	NA	NA	NA	-1.116289259	NA	NA	71.12	74.52	-0.182400411	0.032481993	0.723866931	-0.186964215	-0.581123379	NA	0.488276005	0.27165495	0.50397442	0.603649247
BIH	2008	Bosnia and Herzegovina	2	6	0.671	0.573	0.654	0.891	0.86	0.871	0.536	0.809	1.999	0.622	-1.347	0.997	0.949	0.897	0	0.759	0	-66	-66	-66	NA	0.02	-0.54	-0.6	-0.41	-0.36	NA	NA	NA	NA	-0.868360949	NA	NA	96.99	94.32	1.020753362	1.211248623	0.723866931	-0.186964215	-0.581123379	NA	0.488276005	0.27165495	0.50397442	0.764370202
BIH	2009	Bosnia and Herzegovina	2	6	0.671	0.573	0.654	0.891	0.858	0.871	0.586	0.809	1.731	0.622	-1.347	0.991	0.949	0.895	0	0.759	0	-66	-66	-66	NA	0	-0.67	-0.72	-0.36	-0.38	NA	NA	NA	NA	-0.62043264	NA	NA	61.76	64.02	-0.617712328	-0.592621524	0.532051123	-0.186964215	-0.581123379	NA	0.488276005	0.27165495	0.50397442	0.764370202
BIH	2010	Bosnia and Herzegovina	2	6	0.671	0.573	0.654	0.891	0.858	0.89	0.573	0.79	1.735	0.625	-1.155	0.99	0.987	0.845	0	0.759	0	-66	-66	-66	NA	-0.08	-0.69	-0.74	-0.35	-0.34	0	0	0	-0.292149193	-0.372504331	-0.271236208	-0.074589294	79.04	79.04	0.185940443	0.301574173	0.534914045	-0.183939823	-0.409767206	NA	0.488276005	0.27165495	0.50397442	0.764370202
BIH	2011	Bosnia and Herzegovina	2	6	0.671	0.573	0.654	0.888	0.851	0.89	0.56	0.79	1.57	0.625	-1.155	0.983	0.986	0.854	0	0.759	0	-66	-66	-66	NA	-0.16	-0.82	-0.74	-0.33	-0.32	0	0	0	-0.292149193	-0.124576021	-0.271236208	-0.074589294	104.01	93.67	1.3472373	1.172551738	0.416818492	-0.183939823	-0.409767206	NA	0.488276005	0.27165495	0.50397442	0.753157112
BIH	2012	Bosnia and Herzegovina	2	6	0.671	0.573	0.654	0.896	0.851	0.89	0.59	0.79	1.57	0.625	-1.155	0.982	0.966	0.854	0	0.759	0	-66	-66	-66	NA	-0.1	-0.54	-0.46	-0.21	-0.3	0	0	0	-0.292149193	0.123352288	-0.271236208	-0.074589294	105.01	95.27	1.393744984	1.267805608	0.416818492	-0.183939823	-0.409767206	NA	0.488276005	0.27165495	0.50397442	0.783058685
BIH	2013	Bosnia and Herzegovina	2	6	0.648	0.519	0.685	0.876	0.829	0.861	0.531	0.785	1.686	0.625	-1.042	0.972	0.995	0.86	0	0.835	0	-66	-66	-66	NA	-0.12	-0.4	-0.43	-0.15	-0.24	0	0	0	-0.292149193	0.371280598	-0.271236208	-0.074589294	104.08	94.83	1.350492838	1.241610794	0.499843245	-0.183939823	-0.308916958	NA	0.412403295	0.088613669	0.60659835	0.708304752
BIH	2014	Bosnia and Herzegovina	2	6	0.648	0.519	0.685	0.876	0.818	0.876	0.531	0.768	1.686	0.625	-0.951	0.902	0.882	0.86	0	0.835	0	-66	-66	-66	NA	-0.07	-0.02	-0.45	-0.19	-0.31	0	0	0	-0.292149193	0.619208907	-0.271236208	-0.074589294	96.24	88.9	0.985872599	0.888576141	0.499843245	-0.183939823	-0.227701272	NA	0.412403295	0.088613669	0.60659835	0.708304752
BIH	2015	Bosnia and Herzegovina	2	6	0.632	0.466	0.666	0.876	0.826	0.877	0.533	0.768	1.519	0.625	-0.951	0.915	0.883	0.852	0	0.835	0	-66	-66	-66	NA	-0.1	-0.4	-0.55	-0.28	-0.39	0	0	0	-0.292149193	0.867137216	-0.271236208	-0.074589294	50.75	51.86	-1.129761924	-1.316550929	0.38031623	-0.183939823	-0.227701272	NA	0.359622278	-0.091037958	0.543699812	0.708304752
BIH	2016	Bosnia and Herzegovina	2	6	0.662	0.458	0.664	0.91	0.806	0.877	0.519	0.718	1.653	0.625	-0.946	0.865	0.882	0.889	0	0.8	0	-66	-66	-66	NA	-0.13	-0.4	-0.39	-0.22	-0.46	0	0	0	-0.292149193	1.115065526	-0.271236208	-0.074589294	42.81	45.53	-1.499032931	-1.693399049	0.476224134	-0.183939823	-0.223238872	NA	0.458586684	-0.118155185	0.537078914	0.835386437
BIH	2017	Bosnia and Herzegovina	2	6	0.647	0.457	0.667	0.929	0.802	0.881	0.564	0.69	1.646	0.625	-1.204	0.87	0.887	0.893	0	0.792	0	-66	-66	-66	NA	-0.21	-0.35	-0.48	-0.21	-0.52	0	0	0	-0.292149193	1.362993835	-0.271236208	-0.074589294	52.81	54.28	-1.033956096	-1.172479452	0.47121402	-0.183939823	-0.453498729	NA	0.409104481	-0.121544838	0.547010262	0.906402673
BIH	2018	Bosnia and Herzegovina	2	5	0.646	0.479	0.677	0.751	0.744	0.851	0.54	0.616	1.009	0.625	-0.899	0.778	0.823	0.849	0	0.776	0	-66	-66	-66	NA	-0.24	-0.39	-0.62	-0.23	-0.57	NA	NA	NA	NA	1.610922145	NA	NA	68.35	67.1	-0.311226694	-0.409257826	0.01529361	-0.183939823	-0.181292308	NA	0.405805668	-0.046972465	0.580114755	0.241092676
BLR	2005	Belarus	1	3	0.518	0.722	0.386	0.598	0.369	0.709	0.227	0.352	-0.62	1.119	-0.442	-0.64	-0.221	0.326	0.1	-2.081	0	0	7	-7	-7	-1.77	0.36	-1.08	-1.23	-0.75	NA	NA	NA	NA	-1.612145878	NA	NA	53.39	60.88	-1.00698164	-0.779557242	-1.150631581	0.314076686	0.226571084	-1.757898894	-0.016442462	0.776713298	-0.383226011	-0.330774906
BLR	2006	Belarus	1	3	0.534	0.722	0.45	0.598	0.308	0.691	0.185	0.287	-0.89	1.119	-0.38	-0.672	-0.256	0.276	0.1	-2.081	0	0	7	-7	-7	-1.75	0.15	-1.12	-1.33	-0.62	NA	NA	NA	NA	-1.364217568	NA	NA	64.29	71.49	-0.500047889	-0.147905022	-1.34387885	0.314076686	0.281904848	-1.757898894	0.036338555	0.776713298	-0.171357252	-0.330774906
BLR	2007	Belarus	1	3	0.549	0.722	0.517	0.598	0.346	0.615	0.195	0.287	-0.861	1.119	-0.493	-0.682	-0.251	0.278	0.1	-2.081	0	0	7	-7	-7	-1.7	0.34	-1.11	-1.21	-0.66	NA	NA	NA	NA	-1.116289259	NA	NA	71.12	74.52	-0.182400411	0.032481993	-1.323122662	0.314076686	0.1810546	-1.757898894	0.085820757	0.776713298	0.050442856	-0.330774906
BLR	2008	Belarus	1	3	0.549	0.722	0.517	0.598	0.337	0.664	0.195	0.288	-0.871	1.119	-0.493	-0.654	-0.221	0.278	0.1	-2.081	0	0	7	-7	-7	-1.59	0.52	-1.11	-1.06	-0.63	NA	NA	NA	NA	-0.868360949	NA	NA	96.99	94.32	1.020753362	1.211248623	-1.330279968	0.314076686	0.1810546	-1.757898894	0.085820757	0.776713298	0.050442856	-0.330774906
BLR	2009	Belarus	1	3	0.549	0.722	0.517	0.598	0.345	0.701	0.195	0.334	-0.768	1.119	-0.493	-0.648	-0.226	0.284	0.1	-2.081	0	0	7	-7	-7	-1.55	0.49	-1.13	-1.03	-0.63	NA	NA	NA	NA	-0.62043264	NA	NA	61.76	64.02	-0.617712328	-0.592621524	-1.256559713	0.314076686	0.1810546	-1.757898894	0.085820757	0.776713298	0.050442856	-0.330774906
BLR	2010	Belarus	1	3	0.549	0.722	0.517	0.515	0.306	0.652	0.201	0.276	-0.969	1.119	-0.382	-0.664	-0.233	0.238	0.1	-2.081	0	0	7	-7	-7	-1.56	-0.09	-1.11	-1.07	-0.69	0.168390254	5.69E-05	7.32E-05	-0.269570776	-0.372504331	-0.264625157	-0.074375859	79.04	79.04	0.185940443	0.301574173	-1.400421569	0.314076686	0.280119888	-1.757898894	0.085820757	0.776713298	0.050442856	-0.641003724
BLR	2011	Belarus	1	3	0.549	0.722	0.517	0.575	0.329	0.701	0.196	0.31	-0.966	0.956	-0.452	-0.675	-0.235	0.25	0.1	-2.081	0	0	7	-7	-7	-1.66	-0.09	-1.08	-1.11	-0.68	1.467851683	0.000497071	0.000621181	-0.095333952	-0.124576021	-0.213510346	-0.072777609	104.01	93.67	1.3472373	1.172551738	-1.398274378	0.149751401	0.217646283	-1.757898894	0.085820757	0.776713298	0.050442856	-0.416741928
BLR	2012	Belarus	1	3	0.549	0.722	0.517	0.497	0.322	0.624	0.219	0.245	-0.966	1.101	-0.452	-0.609	-0.106	0.25	0.1	-2.081	0	0	7	-7	-7	-1.57	0.07	-0.9	-0.94	-0.52	0.83060881	0.000281562	0.000342237	-0.180777946	0.123352288	-0.23853783	-0.073591155	105.01	95.27	1.393744984	1.267805608	-1.398274378	0.295930336	0.217646283	-1.757898894	0.085820757	0.776713298	0.050442856	-0.708282263
BLR	2013	Belarus	1	3	0.424	0.702	0.387	0.619	0.379	0.706	0.194	0.369	-0.922	1.101	-0.603	-0.564	-0.072	0.243	0.1	-1.976	0	0	7	-7	-7	-1.54	0.01	-0.9	-0.9	-0.47	0.409179238	0.000138658	0.000159586	-0.237284856	0.371280598	-0.255133605	-0.074123858	104.08	94.83	1.350492838	1.241610794	-1.36678223	0.295930336	0.082881792	-1.757898894	-0.326530931	0.708920231	-0.379915562	-0.252283277
BLR	2014	Belarus	1	3	0.424	0.702	0.387	0.619	0.358	0.731	0.217	0.308	-0.922	1.101	-0.603	-0.551	-0.074	0.243	0.1	-1.992	0	0	7	-7	-7	-1.44	0.18	-0.49	-0.84	-0.3	0.291259603	9.86E-05	0.000111937	-0.253095977	0.619208907	-0.259785787	-0.074262828	96.24	88.9	0.985872599	0.888576141	-1.36678223	0.295930336	0.082881792	-1.757898894	-0.326530931	0.708920231	-0.379915562	-0.252283277
BLR	2015	Belarus	1	3	0.424	0.702	0.387	0.619	0.384	0.723	0.215	0.345	-0.462	1.101	-0.701	-0.501	-0.024	0.338	0.1	-1.976	0	0	7	-7	-7	-1.47	0.11	-0.46	-0.81	-0.34	0.28227701	9.55E-05	0.000125234	-0.254300398	0.867137216	-0.260150182	-0.074224047	50.75	51.86	-1.129761924	-1.316550929	-1.037546142	0.295930336	-0.004581254	-1.757898894	-0.326530931	0.708920231	-0.379915562	-0.252283277
BLR	2016	Belarus	1	3	0.407	0.686	0.395	0.637	0.447	0.766	0.234	0.386	0.21	0.95	-0.754	-0.431	-0.064	0.406	0.1	-1.923	0	0	7	-7	-7	-1.34	0.14	-0.48	-0.72	-0.26	0.285339462	9.64E-05	0.000140492	-0.253889773	1.115065526	-0.260045047	-0.074179546	42.81	45.53	-1.499032931	-1.693399049	-0.55657516	0.143702617	-0.051882698	-1.757898894	-0.382610761	0.654685777	-0.353431967	-0.185004738
BLR	2017	Belarus	1	3	0.409	0.691	0.392	0.7	0.439	0.767	0.23	0.432	-0.001	0.95	-0.738	-0.434	-0.055	0.378	0.1	-1.887	0	0	7	-7	-7	-1.36	-0.05	-0.34	-0.82	-0.26	0.314219182	0.000106155	0.000141222	-0.250017468	1.362993835	-0.258908206	-0.074177417	52.81	54.28	-1.033956096	-1.172479452	-0.707594323	0.143702617	-0.037603017	-1.757898894	-0.376013134	0.671634044	-0.363363315	0.050470149
BLR	2018	Belarus	1	3	0.408	0.693	0.392	0.743	0.406	0.773	0.243	0.354	0.097	0.95	-0.743	-0.431	-0.06	0.389	0.1	-1.884	0	0	7	-7	-7	-1.35	0.35	-0.3	-0.83	-0.19	NA	NA	NA	NA	1.610922145	NA	NA	68.35	67.1	-0.311226694	-0.409257826	-0.637452721	0.143702617	-0.042065417	-1.757898894	-0.379311947	0.678413351	-0.363363315	0.211191103
BLZ	2005	Belize	NA	NA	NA	NA	NA	NA	NA	NA	NA	NA	NA	NA	NA	NA	NA	NA	NA	NA	0	NA	NA	NA	NA	0.69	0.1	-0.09	-0.16	-0.3	NA	NA	NA	NA	-1.612145878	NA	NA	53.39	60.88	-1.00698164	-0.779557242	NA	NA	NA	NA	NA	NA	NA	NA
BLZ	2006	Belize	NA	NA	NA	NA	NA	NA	NA	NA	NA	NA	NA	NA	NA	NA	NA	NA	NA	NA	0	NA	NA	NA	NA	0.54	0.08	-0.33	-0.04	-0.36	NA	NA	NA	NA	-1.364217568	NA	NA	64.29	71.49	-0.500047889	-0.147905022	NA	NA	NA	NA	NA	NA	NA	NA
BLZ	2007	Belize	NA	NA	NA	NA	NA	NA	NA	NA	NA	NA	NA	NA	NA	NA	NA	NA	NA	NA	0	NA	NA	NA	NA	0.53	0.19	-0.45	-0.11	-0.37	NA	NA	NA	NA	-1.116289259	NA	NA	71.12	74.52	-0.182400411	0.032481993	NA	NA	NA	NA	NA	NA	NA	NA
BLZ	2008	Belize	NA	NA	NA	NA	NA	NA	NA	NA	NA	NA	NA	NA	NA	NA	NA	NA	NA	NA	0	NA	NA	NA	NA	0.65	0.19	-0.51	-0.21	-0.34	NA	NA	NA	NA	-0.868360949	NA	NA	96.99	94.32	1.020753362	1.211248623	NA	NA	NA	NA	NA	NA	NA	NA
BLZ	2009	Belize	NA	NA	NA	NA	NA	NA	NA	NA	NA	NA	NA	NA	NA	NA	NA	NA	NA	NA	0	NA	NA	NA	NA	0.74	0.03	-0.45	-0.37	-0.05	NA	NA	NA	NA	-0.62043264	NA	NA	61.76	64.02	-0.617712328	-0.592621524	NA	NA	NA	NA	NA	NA	NA	NA
BLZ	2010	Belize	NA	NA	NA	NA	NA	NA	NA	NA	NA	NA	NA	NA	NA	NA	NA	NA	NA	NA	0	NA	NA	NA	NA	0.69	0.07	-0.43	-0.34	-0.11	0	0	0	-0.292149193	-0.372504331	-0.271236208	-0.074589294	79.04	79.04	0.185940443	0.301574173	NA	NA	NA	NA	NA	NA	NA	NA
BLZ	2011	Belize	NA	NA	NA	NA	NA	NA	NA	NA	NA	NA	NA	NA	NA	NA	NA	NA	NA	NA	0	NA	NA	NA	NA	0.7	0.15	-0.38	-0.49	-0.33	0.0401409	2.71E-05	6.18E-05	-0.286766946	-0.124576021	-0.268092822	-0.074409184	104.01	93.67	1.3472373	1.172551738	NA	NA	NA	NA	NA	NA	NA	NA
BLZ	2012	Belize	NA	NA	NA	NA	NA	NA	NA	NA	NA	NA	NA	NA	NA	NA	NA	NA	NA	NA	0	NA	NA	NA	NA	0.7	0.18	-0.32	-0.46	-0.14	0.042489097	2.76E-05	6.29E-05	-0.286452091	0.123352288	-0.268030008	-0.07440598	105.01	95.27	1.393744984	1.267805608	NA	NA	NA	NA	NA	NA	NA	NA
BLZ	2013	Belize	NA	NA	NA	NA	NA	NA	NA	NA	NA	NA	NA	NA	NA	NA	NA	NA	NA	NA	0	NA	NA	NA	NA	0.71	0.18	-0.33	-0.47	-0.1	0.043539494	2.77E-05	6.26E-05	-0.286311249	0.371280598	-0.26802176	-0.074406583	104.08	94.83	1.350492838	1.241610794	NA	NA	NA	NA	NA	NA	NA	NA
BLZ	2014	Belize	NA	NA	NA	NA	NA	NA	NA	NA	NA	NA	NA	NA	NA	NA	NA	NA	NA	NA	0	NA	NA	NA	NA	0.52	0.05	-0.66	-0.75	-0.2	0.047419321	2.97E-05	6.53E-05	-0.285791027	0.619208907	-0.267787931	-0.074398799	96.24	88.9	0.985872599	0.888576141	NA	NA	NA	NA	NA	NA	NA	NA
BLZ	2015	Belize	NA	NA	NA	NA	NA	NA	NA	NA	NA	NA	NA	NA	NA	NA	NA	NA	NA	NA	0	NA	NA	NA	NA	0.58	0.04	-0.68	-0.72	-0.22	0.048468493	2.95E-05	6.39E-05	-0.28565035	0.867137216	-0.267810316	-0.07440305	50.75	51.86	-1.129761924	-1.316550929	NA	NA	NA	NA	NA	NA	NA	NA
BLZ	2016	Belize	NA	NA	NA	NA	NA	NA	NA	NA	NA	NA	NA	NA	NA	NA	NA	NA	NA	NA	0	NA	NA	NA	NA	0.57	0.06	-0.68	-0.86	-0.24	0.046337609	2.78E-05	5.93E-05	-0.285936067	1.115065526	-0.268010023	-0.074416475	42.81	45.53	-1.499032931	-1.693399049	NA	NA	NA	NA	NA	NA	NA	NA
BLZ	2017	Belize	NA	NA	NA	NA	NA	NA	NA	NA	NA	NA	NA	NA	NA	NA	NA	NA	NA	NA	0	NA	NA	NA	NA	0.57	0.04	-0.64	-0.96	-0.27	0.045703809	2.67E-05	5.55E-05	-0.28602105	1.362993835	-0.26813049	-0.07442733	52.81	54.28	-1.033956096	-1.172479452	NA	NA	NA	NA	NA	NA	NA	NA
BLZ	2018	Belize	NA	NA	NA	NA	NA	NA	NA	NA	NA	NA	NA	NA	NA	NA	NA	NA	NA	NA	0	NA	NA	NA	NA	0.45	0.02	-0.59	-0.82	-0.14	NA	NA	NA	NA	1.610922145	NA	NA	68.35	67.1	-0.311226694	-0.409257826	NA	NA	NA	NA	NA	NA	NA	NA
BMU	2005	Bermuda	NA	NA	NA	NA	NA	NA	NA	NA	NA	NA	NA	NA	NA	NA	NA	NA	NA	NA	0	NA	NA	NA	NA	1.15	0.82	1.03	0.86	1.28	NA	NA	NA	NA	-1.612145878	NA	NA	53.39	60.88	-1.00698164	-0.779557242	NA	NA	NA	NA	NA	NA	NA	NA
BMU	2006	Bermuda	NA	NA	NA	NA	NA	NA	NA	NA	NA	NA	NA	NA	NA	NA	NA	NA	NA	NA	0	NA	NA	NA	NA	1.02	0.78	1.03	0.82	1.26	NA	NA	NA	NA	-1.364217568	NA	NA	64.29	71.49	-0.500047889	-0.147905022	NA	NA	NA	NA	NA	NA	NA	NA
BMU	2007	Bermuda	NA	NA	NA	NA	NA	NA	NA	NA	NA	NA	NA	NA	NA	NA	NA	NA	NA	NA	0	NA	NA	NA	NA	0.97	0.77	1	0.84	1.27	NA	NA	NA	NA	-1.116289259	NA	NA	71.12	74.52	-0.182400411	0.032481993	NA	NA	NA	NA	NA	NA	NA	NA
BMU	2008	Bermuda	NA	NA	NA	NA	NA	NA	NA	NA	NA	NA	NA	NA	NA	NA	NA	NA	NA	NA	0	NA	NA	NA	NA	0.97	0.8	1.02	0.86	1.29	NA	NA	NA	NA	-0.868360949	NA	NA	96.99	94.32	1.020753362	1.211248623	NA	NA	NA	NA	NA	NA	NA	NA
BMU	2009	Bermuda	NA	NA	NA	NA	NA	NA	NA	NA	NA	NA	NA	NA	NA	NA	NA	NA	NA	NA	0	NA	NA	NA	NA	0.96	0.69	1.02	0.86	1.33	NA	NA	NA	NA	-0.62043264	NA	NA	61.76	64.02	-0.617712328	-0.592621524	NA	NA	NA	NA	NA	NA	NA	NA
BMU	2010	Bermuda	NA	NA	NA	NA	NA	NA	NA	NA	NA	NA	NA	NA	NA	NA	NA	NA	NA	NA	0	NA	NA	NA	NA	0.99	0.91	1.01	1.12	1.31	NA	NA	NA	NA	-0.372504331	NA	NA	79.04	79.04	0.185940443	0.301574173	NA	NA	NA	NA	NA	NA	NA	NA
BMU	2011	Bermuda	NA	NA	NA	NA	NA	NA	NA	NA	NA	NA	NA	NA	NA	NA	NA	NA	NA	NA	0	NA	NA	NA	NA	1.01	0.96	1	1.1	1.28	NA	NA	NA	NA	-0.124576021	NA	NA	104.01	93.67	1.3472373	1.172551738	NA	NA	NA	NA	NA	NA	NA	NA
BMU	2012	Bermuda	NA	NA	NA	NA	NA	NA	NA	NA	NA	NA	NA	NA	NA	NA	NA	NA	NA	NA	0	NA	NA	NA	NA	1.03	0.98	1.01	1.1	1.27	NA	NA	NA	NA	0.123352288	NA	NA	105.01	95.27	1.393744984	1.267805608	NA	NA	NA	NA	NA	NA	NA	NA
BMU	2013	Bermuda	NA	NA	NA	NA	NA	NA	NA	NA	NA	NA	NA	NA	NA	NA	NA	NA	NA	NA	0	NA	NA	NA	NA	1	0.97	1.01	1.11	1.26	NA	NA	NA	NA	0.371280598	NA	NA	104.08	94.83	1.350492838	1.241610794	NA	NA	NA	NA	NA	NA	NA	NA
BMU	2014	Bermuda	NA	NA	NA	NA	NA	NA	NA	NA	NA	NA	NA	NA	NA	NA	NA	NA	NA	NA	0	NA	NA	NA	NA	NA	0.91	0.95	0.02	1.23	NA	NA	NA	NA	0.619208907	NA	NA	96.24	88.9	0.985872599	0.888576141	NA	NA	NA	NA	NA	NA	NA	NA
BMU	2015	Bermuda	NA	NA	NA	NA	NA	NA	NA	NA	NA	NA	NA	NA	NA	NA	NA	NA	NA	NA	0	NA	NA	NA	NA	NA	0.98	1.01	0.88	1.22	NA	NA	NA	NA	0.867137216	NA	NA	50.75	51.86	-1.129761924	-1.316550929	NA	NA	NA	NA	NA	NA	NA	NA
BMU	2016	Bermuda	NA	NA	NA	NA	NA	NA	NA	NA	NA	NA	NA	NA	NA	NA	NA	NA	NA	NA	0	NA	NA	NA	NA	NA	1	1.33	0.87	1.23	NA	NA	NA	NA	1.115065526	NA	NA	42.81	45.53	-1.499032931	-1.693399049	NA	NA	NA	NA	NA	NA	NA	NA
BMU	2017	Bermuda	NA	NA	NA	NA	NA	NA	NA	NA	NA	NA	NA	NA	NA	NA	NA	NA	NA	NA	0	NA	NA	NA	NA	NA	1	1.39	0.87	1.24	NA	NA	NA	NA	1.362993835	NA	NA	52.81	54.28	-1.033956096	-1.172479452	NA	NA	NA	NA	NA	NA	NA	NA
BMU	2018	Bermuda	NA	NA	NA	NA	NA	NA	NA	NA	NA	NA	NA	NA	NA	NA	NA	NA	NA	NA	0	NA	NA	NA	NA	NA	1.16	1.39	0.88	1.24	NA	NA	NA	NA	1.610922145	NA	NA	68.35	67.1	-0.311226694	-0.409257826	NA	NA	NA	NA	NA	NA	NA	NA
BOL	2005	Bolivia	2	6	0.654	0.499	0.523	0.861	0.911	0.795	0.518	0.894	2.071	1.83	0.849	1.3	1.337	0.906	0.1	NA	0	8	0	8	8	-0.16	-0.97	-0.69	-0.76	-0.74	NA	NA	NA	NA	-1.612145878	NA	NA	53.39	60.88	-1.00698164	-0.779557242	0.775399536	1.030857533	1.378762853	0.642164019	0.432196176	0.020820602	0.070305552	0.652239303
BOL	2006	Bolivia	2	6	0.672	0.544	0.582	0.864	0.898	0.801	0.446	0.88	2.003	1.819	0.608	1.138	1.285	0.917	0.9	NA	0	8	0	8	8	0.08	-0.8	-0.72	-0.85	-0.43	NA	NA	NA	NA	-1.364217568	NA	NA	64.29	71.49	-0.500047889	-0.147905022	0.726729853	1.019768096	1.163675157	0.642164019	0.491574819	0.173355003	0.265622065	0.663452393
BOL	2007	Bolivia	2	6	0.672	0.544	0.582	0.864	0.88	0.819	0.446	0.846	2.003	1.819	0.809	1.131	1.28	0.917	0.9	NA	0	8	0	8	8	0.04	-0.85	-0.57	-0.83	-0.4	NA	NA	NA	NA	-1.116289259	NA	NA	71.12	74.52	-0.182400411	0.032481993	0.726729853	1.019768096	1.34306365	0.642164019	0.491574819	0.173355003	0.265622065	0.663452393
BOL	2008	Bolivia	2	6	0.672	0.544	0.582	0.864	0.88	0.798	0.449	0.846	2.003	1.819	0.869	1.126	1.273	0.917	0.9	NA	0	8	0	8	8	0	-0.7	-0.62	-0.97	-0.52	NA	NA	NA	NA	-0.868360949	NA	NA	96.99	94.32	1.020753362	1.211248623	0.726729853	1.019768096	1.396612455	0.642164019	0.491574819	0.173355003	0.265622065	0.663452393
BOL	2009	Bolivia	2	6	0.673	0.538	0.582	0.864	0.88	0.822	0.427	0.846	2.003	1.819	0.17	1.044	1.12	0.917	0.9	NA	0	7	0	7	7	0.01	-0.51	-0.6	-1.11	-0.63	NA	NA	NA	NA	-0.62043264	NA	NA	61.76	64.02	-0.617712328	-0.592621524	0.726729853	1.019768096	0.772768886	0.482159825	0.494873632	0.153017083	0.265622065	0.663452393
BOL	2010	Bolivia	2	6	0.68	0.498	0.569	0.867	0.858	0.854	0.462	0.818	1.632	1.819	0.157	0.972	1.095	0.879	0.9	NA	1	7	0	7	7	-0.04	-0.42	-0.5	-1.02	-0.47	0.053131518	0.004427627	6.03E-05	-0.285025114	-0.372504331	0.242952666	-0.074413404	79.04	79.04	0.185940443	0.301574173	0.461193791	1.019768096	0.761166645	0.482159825	0.517965327	0.017430949	0.222586223	0.674665483
BOL	2011	Bolivia	2	6	0.68	0.498	0.569	0.867	0.882	0.854	0.462	0.818	1.552	1.819	0.157	0.963	1.096	0.889	0.8	NA	0	7	0	7	7	-0.07	-0.42	-0.47	-0.98	-0.57	0.614135934	0.013066722	0.000494076	-0.209803468	-0.124576021	1.246227623	-0.073148315	104.01	93.67	1.3472373	1.172551738	0.403935341	1.019768096	0.761166645	0.482159825	0.517965327	0.017430949	0.222586223	0.674665483
BOL	2012	Bolivia	2	6	0.68	0.498	0.569	0.86	0.862	0.854	0.471	0.822	0.964	1.819	-0.214	0.908	1.052	0.816	0.7	NA	0	7	0	7	7	-0.08	-0.46	-0.37	-1.02	-0.73	1.035170716	0.012178479	0.000760596	-0.153349493	0.123352288	1.143074238	-0.072371005	105.01	95.27	1.393744984	1.267805608	-0.016914268	1.019768096	0.430056539	0.482159825	0.517965327	0.017430949	0.222586223	0.648501607
BOL	2013	Bolivia	2	6	0.621	0.367	0.475	0.843	0.846	0.832	0.536	0.835	0.814	1.819	-0.214	0.901	1.034	0.806	0.6	NA	0	7	0	7	7	-0.07	-0.33	-0.39	-1.05	-0.59	1.118933075	0.008880421	0.000713605	-0.142118311	0.371280598	0.760064375	-0.072508054	104.08	94.83	1.350492838	1.241610794	-0.124273862	1.019768096	0.430056539	0.482159825	0.32333533	-0.426613639	-0.088596017	0.584960764
BOL	2014	Bolivia	2	6	0.625	0.39	0.475	0.843	0.857	0.844	0.534	0.82	0.814	1.819	-0.214	0.852	0.954	0.823	0.5	NA	0	7	0	7	7	-0.03	-0.33	-0.59	-1.06	-0.63	0.880970344	0.005404726	0.000538161	-0.174025276	0.619208907	0.356425135	-0.073019738	96.24	88.9	0.985872599	0.888576141	-0.124273862	1.019768096	0.430056539	0.482159825	0.336530584	-0.348651612	-0.088596017	0.584960764
BOL	2015	Bolivia	2	6	0.627	0.47	0.475	0.894	0.847	0.857	0.509	0.823	0.541	1.042	-0.387	0.805	0.958	0.771	0.4	NA	0	7	0	7	7	0	-0.27	-0.65	-1.14	-0.7	0.141476751	0.000661106	8.64E-05	-0.273179442	0.867137216	-0.194460646	-0.074337389	50.75	51.86	-1.129761924	-1.316550929	-0.319668323	0.236450631	0.275657487	0.482159825	0.343128211	-0.077479345	-0.088596017	0.775583291
BOL	2016	Bolivia	2	6	0.622	0.439	0.479	0.856	0.843	0.859	0.524	0.817	0.693	1.042	0.147	0.796	0.978	0.783	0.3	NA	0	7	0	7	7	-0.04	-0.25	-0.57	-1.2	-0.72	0.075001009	0.000308646	4.54E-05	-0.282092768	1.115065526	-0.235392533	-0.074456883	42.81	45.53	-1.499032931	-1.693399049	-0.210877268	0.236450631	0.752241844	0.482159825	0.326634143	-0.182558598	-0.07535422	0.63355082
BOL	2017	Bolivia	2	6	0.608	0.391	0.474	0.895	0.839	0.846	0.516	0.797	0.875	1.042	0.541	0.781	0.968	0.804	0.3	NA	0	7	0	7	7	-0.03	-0.28	-0.38	-1.21	-0.66	0.078999281	0.000288319	4.56E-05	-0.281556664	1.362993835	-0.237753215	-0.07445619	52.81	54.28	-1.033956096	-1.172479452	-0.080614294	0.236450631	1.103878992	0.482159825	0.280450754	-0.345261959	-0.091906467	0.779320988
BOL	2018	Bolivia	2	6	0.614	0.42	0.458	0.895	0.818	0.832	0.497	0.844	0.758	1.042	0.914	0.722	0.908	0.758	0.1	NA	0	7	0	7	7	-0.04	-0.24	-0.32	-1.15	-0.63	NA	NA	NA	NA	1.610922145	NA	NA	68.35	67.1	-0.311226694	-0.409257826	-0.164354777	0.236450631	1.436774058	0.482159825	0.300243635	-0.246962012	-0.144873657	0.779320988
BRA	2005	Brazil	2	6	0.546	0.664	0.41	0.755	0.958	0.934	0.754	0.939	3.097	2.058	-1.995	1.742	1.59	0.953	0	NA	0	8	0	8	8	0.46	-0.26	-0.1	-0.43	-0.14	NA	NA	NA	NA	-1.612145878	NA	NA	53.39	60.88	-1.00698164	-0.779557242	1.509739159	1.260711306	-1.159450464	0.642164019	0.075924317	0.580113404	-0.303775227	0.256043462
BRA	2006	Brazil	2	6	0.529	0.598	0.41	0.755	0.958	0.944	0.75	0.939	3.097	2.058	-1.995	1.719	1.566	0.953	0	NA	0	8	0	8	8	0.5	-0.29	-0.32	-0.37	-0.11	NA	NA	NA	NA	-1.364217568	NA	NA	64.29	71.49	-0.500047889	-0.147905022	1.509739159	1.260711306	-1.159450464	0.642164019	0.019844487	0.356396283	-0.303775227	0.256043462
BRA	2007	Brazil	2	6	0.529	0.598	0.41	0.755	0.958	0.944	0.75	0.942	3.097	2.058	-1.995	1.718	1.574	0.953	0	NA	0	8	0	8	8	0.54	-0.36	-0.21	-0.37	-0.08	NA	NA	NA	NA	-1.116289259	NA	NA	71.12	74.52	-0.182400411	0.032481993	1.509739159	1.260711306	-1.159450464	0.642164019	0.019844487	0.356396283	-0.303775227	0.256043462
BRA	2008	Brazil	2	6	0.529	0.598	0.41	0.755	0.958	0.934	0.778	0.942	3.097	2.058	-1.995	1.727	1.574	0.953	0	NA	0	8	0	8	8	0.57	-0.31	-0.09	-0.32	0.01	NA	NA	NA	NA	-0.868360949	NA	NA	96.99	94.32	1.020753362	1.211248623	1.509739159	1.260711306	-1.159450464	0.642164019	0.019844487	0.356396283	-0.303775227	0.256043462
BRA	2009	Brazil	2	6	0.529	0.598	0.41	0.755	0.958	0.934	0.778	0.942	3.097	2.058	-1.995	1.714	1.57	0.953	0	NA	0	8	0	8	8	0.52	0.17	-0.09	-0.16	-0.07	NA	NA	NA	NA	-0.62043264	NA	NA	61.76	64.02	-0.617712328	-0.592621524	1.509739159	1.260711306	-1.159450464	0.642164019	0.019844487	0.356396283	-0.303775227	0.256043462
BRA	2010	Brazil	2	6	0.529	0.598	0.41	0.755	0.964	0.941	0.769	0.944	3.097	2.092	-1.831	1.777	1.658	0.961	0	NA	0	8	0	8	8	0.57	0.01	-0.04	0.04	0.05	0.658719179	0.000758893	0.000690481	-0.203825573	-0.372504331	-0.183104481	-0.072575495	79.04	79.04	0.185940443	0.301574173	1.509739159	1.294987746	-1.013083733	0.642164019	0.019844487	0.356396283	-0.303775227	0.256043462
BRA	2011	Brazil	2	6	0.524	0.581	0.41	0.755	0.964	0.942	0.755	0.944	3.097	1.452	-1.831	1.771	1.659	0.951	0	NA	0	8	0	8	8	0.51	-0.13	-0.12	0.04	0.17	3.537182537	0.004019526	0.003394609	0.182129947	-0.124576021	0.195559116	-0.064688868	104.01	93.67	1.3472373	1.172551738	1.509739159	0.649784171	-1.013083733	0.642164019	0.003350419	0.298772176	-0.303775227	0.256043462
BRA	2012	Brazil	2	6	0.524	0.581	0.41	0.755	0.958	0.942	0.778	0.936	2.676	1.452	-1.831	1.762	1.663	0.94	0	NA	0	8	0	8	8	0.48	0.05	-0.13	-0.07	-0.04	3.866784176	0.004325262	0.00380589	0.226324212	0.123352288	0.231064871	-0.063489361	105.01	95.27	1.393744984	1.267805608	1.208416565	0.649784171	-1.013083733	0.642164019	0.003350419	0.298772176	-0.303775227	0.256043462
BRA	2013	Brazil	2	6	0.547	0.693	0.39	0.797	0.958	0.928	0.738	0.94	2.676	1.269	-1.396	1.786	1.671	0.945	0	NA	0	8	0	8	8	0.42	-0.26	-0.09	-0.08	-0.08	3.463010692	0.003801329	0.003401779	0.172184699	0.371280598	0.170219516	-0.064667957	104.08	94.83	1.350492838	1.241610794	1.208416565	0.465296274	-0.624854903	0.642164019	0.07922313	0.678413351	-0.369984214	0.41302672
BRA	2014	Brazil	2	6	0.57	0.693	0.39	0.797	0.953	0.928	0.73	0.935	2.676	1.269	-1.396	1.717	1.56	0.945	0	NA	0	8	0	8	8	0.47	-0.07	-0.14	-0.05	-0.34	3.275546961	0.003544964	0.003230322	0.147048835	0.619208907	0.140447382	-0.065168012	96.24	88.9	0.985872599	0.888576141	1.208416565	0.465296274	-0.624854903	0.642164019	0.155095841	0.678413351	-0.369984214	0.41302672
BRA	2015	Brazil	2	6	0.57	0.693	0.39	0.797	0.952	0.928	0.721	0.925	3.007	1.269	-1.099	1.72	1.565	0.939	0	NA	0	8	0	8	8	0.46	-0.33	-0.18	-0.15	-0.4	3.037775878	0.003231676	0.011912847	0.115167567	0.867137216	0.104064663	-0.039845305	50.75	51.86	-1.129761924	-1.316550929	1.445323403	0.465296274	-0.359788322	0.642164019	0.155095841	0.678413351	-0.369984214	0.41302672
BRA	2016	Brazil	2	6	0.677	0.748	0.428	0.712	0.866	0.915	0.721	0.799	1.879	-0.392	-0.942	1.316	1.497	0.884	0	NA	0	8	0	8	8	0.45	-0.38	-0.17	-0.16	-0.38	3.019569114	0.003168488	0.012030156	0.112726334	1.115065526	0.09672647	-0.039503171	42.81	45.53	-1.499032931	-1.693399049	0.637979256	-1.209208629	-0.219668951	0.642164019	0.508068886	0.864844284	-0.244187138	0.095322508
BRA	2017	Brazil	2	6	0.671	0.749	0.435	0.697	0.856	0.888	0.601	0.772	1.863	-0.611	-0.416	1.223	1.423	0.858	0	NA	0	8	0	8	8	0.45	-0.42	-0.29	-0.28	-0.53	3.024601655	0.003098977	0.003316449	0.113401116	1.362993835	0.088654029	-0.064916822	52.81	54.28	-1.033956096	-1.172479452	0.626527566	-1.429989227	0.249775565	0.642164019	0.488276005	0.868233938	-0.221013992	0.039257059
BRA	2018	Brazil	2	6	0.662	0.749	0.435	0.697	0.86	0.891	0.6	0.773	1.762	-0.611	-0.48	1.065	1.169	0.85	0	NA	0	8	0	8	8	0.39	-0.36	-0.45	-0.28	-0.42	NA	NA	NA	NA	1.610922145	NA	NA	68.35	67.1	-0.311226694	-0.409257826	0.554238772	-1.429989227	0.192656841	0.642164019	0.458586684	0.868233938	-0.221013992	0.039257059
BRB	2005	Barbados	2	7	0.107	0.11	0.133	0.906	0.921	0.918	0.932	0.908	2.388	1.721	-1.885	1.304	1.172	0.888	0	0.576	0	NA	NA	NA	NA	0.95	1.12	1.3	1.35	1.42	NA	NA	NA	NA	-1.612145878	NA	NA	53.39	60.88	-1.00698164	-0.779557242	1.002286145	0.920971299	-1.061277657	NA	-1.372254814	-1.297754548	-1.220769702	0.820435651
BRB	2006	Barbados	2	7	0.107	0.11	0.133	0.881	0.921	0.918	0.932	0.908	2.388	1.721	-1.885	1.301	1.173	0.888	0	0.576	0	NA	NA	NA	NA	1.04	0.91	1.45	1.24	1.33	NA	NA	NA	NA	-1.364217568	NA	NA	64.29	71.49	-0.500047889	-0.147905022	1.002286145	0.920971299	-1.061277657	NA	-1.372254814	-1.297754548	-1.220769702	0.726993235
BRB	2007	Barbados	2	7	0.107	0.11	0.133	0.914	0.921	0.918	0.932	0.908	2.388	1.721	-1.885	1.298	1.173	0.888	0	0.576	0	NA	NA	NA	NA	1.03	1.04	1.33	1.33	1.41	NA	NA	NA	NA	-1.116289259	NA	NA	71.12	74.52	-0.182400411	0.032481993	1.002286145	0.920971299	-1.061277657	NA	-1.372254814	-1.297754548	-1.220769702	0.850337224
BRB	2008	Barbados	2	7	0.106	0.113	0.133	0.914	0.921	0.918	0.933	0.908	2.388	1.721	-1.885	1.359	1.273	0.888	0	0.576	0	NA	NA	NA	NA	0.95	1.07	1.57	1.31	1.37	NA	NA	NA	NA	-0.868360949	NA	NA	96.99	94.32	1.020753362	1.211248623	1.002286145	0.920971299	-1.061277657	NA	-1.375553627	-1.287585588	-1.220769702	0.850337224
BRB	2009	Barbados	2	7	0.106	0.113	0.133	0.914	0.921	0.918	0.933	0.908	2.388	1.721	-1.885	1.355	1.276	0.888	0	0.576	0	NA	NA	NA	NA	1.13	1.05	1.48	1.01	1.38	NA	NA	NA	NA	-0.62043264	NA	NA	61.76	64.02	-0.617712328	-0.592621524	1.002286145	0.920971299	-1.061277657	NA	-1.375553627	-1.287585588	-1.220769702	0.850337224
BRB	2010	Barbados	2	6	0.106	0.112	0.133	0.915	0.921	0.918	0.93	0.908	2.388	1.721	-1.885	1.356	1.279	0.888	0	0.576	0	NA	NA	NA	NA	1.14	1.06	1.41	1.08	1.48	0	0	0	-0.292149193	-0.372504331	-0.271236208	-0.074589294	79.04	79.04	0.185940443	0.301574173	1.002286145	0.920971299	-1.061277657	NA	-1.375553627	-1.290975241	-1.220769702	0.85407492
BRB	2011	Barbados	2	6	0.106	0.112	0.133	0.915	0.921	0.918	0.935	0.908	2.388	1.721	-1.885	1.365	1.277	0.888	0	0.576	0	NA	NA	NA	NA	1.11	1.25	1.47	1.08	1.72	0.009315399	7.36E-06	4.65E-06	-0.290900149	-0.124576021	-0.270381693	-0.074575736	104.01	93.67	1.3472373	1.172551738	1.002286145	0.920971299	-1.061277657	NA	-1.375553627	-1.290975241	-1.220769702	0.85407492
BRB	2012	Barbados	2	6	0.106	0.112	0.133	0.915	0.921	0.918	0.935	0.908	2.388	1.721	-1.885	1.359	1.278	0.888	0	0.576	0	NA	NA	NA	NA	1.13	1.19	1.46	1.03	1.66	0.009220192	7.27E-06	4.62E-06	-0.290912914	0.123352288	-0.270392426	-0.074575828	105.01	95.27	1.393744984	1.267805608	1.002286145	0.920971299	-1.061277657	NA	-1.375553627	-1.290975241	-1.220769702	0.85407492
BRB	2013	Barbados	2	6	0.106	0.112	0.133	0.915	0.921	0.918	0.935	0.908	2.388	1.721	-1.885	1.321	1.209	0.888	0	0.576	0	NA	NA	NA	NA	1.14	1.27	1.36	1.05	1.62	0.009354497	7.34E-06	4.66E-06	-0.290894906	0.371280598	-0.270384164	-0.074575707	104.08	94.83	1.350492838	1.241610794	1.002286145	0.920971299	-1.061277657	NA	-1.375553627	-1.290975241	-1.220769702	0.85407492
BRB	2014	Barbados	2	6	0.106	0.112	0.133	0.884	0.921	0.918	0.935	0.908	2.388	1.721	-1.885	1.319	1.213	0.888	0	0.576	0	NA	NA	NA	NA	1.15	1.28	1.2	1.08	1.14	0.00929685	7.27E-06	4.61E-06	-0.290902636	0.619208907	-0.270391402	-0.074575837	96.24	88.9	0.985872599	0.888576141	1.002286145	0.920971299	-1.061277657	NA	-1.375553627	-1.290975241	-1.220769702	0.738206325
BRB	2015	Barbados	3	8	0.107	0.149	0.098	0.928	0.918	0.917	0.926	0.912	1.887	1.721	-2.223	1.283	1.209	0.861	0	0.576	0	NA	NA	NA	NA	1.1	1.14	1.03	1.1	1.49	0.007965466	6.22E-06	3.94E-06	-0.291081153	0.867137216	-0.270513516	-0.074577804	50.75	51.86	-1.129761924	-1.316550929	0.643705101	0.920971299	-1.36293592	NA	-1.372254814	-1.165558067	-1.33663543	0.902664976
BRB	2016	Barbados	3	8	0.107	0.149	0.098	0.928	0.925	0.917	0.926	0.912	1.887	1.721	-2.223	1.285	1.202	0.861	0	0.576	0	NA	NA	NA	NA	1.09	0.98	1.08	0.8	1.26	0.009395151	7.31E-06	4.58E-06	-0.290889455	1.115065526	-0.270387121	-0.074575947	42.81	45.53	-1.499032931	-1.693399049	0.643705101	0.920971299	-1.36293592	NA	-1.372254814	-1.165558067	-1.33663543	0.902664976
BRB	2017	Barbados	3	8	0.11	0.166	0.097	0.924	0.934	0.906	0.936	0.94	1.887	1.721	-2.223	1.292	1.16	0.871	0	0.581	0	NA	NA	NA	NA	1.11	0.97	0.84	0.66	1.42	0.009441479	7.34E-06	4.53E-06	-0.290883243	1.362993835	-0.27038426	-0.074576087	52.81	54.28	-1.033956096	-1.172479452	0.643705101	0.920971299	-1.36293592	NA	-1.362358373	-1.10793396	-1.339945879	0.88771419
BRB	2018	Barbados	3	9	0.098	0.116	0.097	0.879	0.915	0.916	0.949	0.916	1.096	1.721	-2.023	1.34	1.205	0.808	0	0.581	0	NA	NA	NA	NA	1.12	0.92	0.43	0.39	1.41	NA	NA	NA	NA	1.610922145	NA	NA	68.35	67.1	-0.311226694	-0.409257826	0.077562175	0.920971299	-1.184439906	NA	-1.401944135	-1.277416628	-1.339945879	0.719517842
BRN	2005	Brunei Darussalam	NA	NA	NA	NA	NA	NA	NA	NA	NA	NA	NA	NA	NA	NA	NA	NA	NA	NA	0	NA	NA	NA	NA	-0.78	1.21	0.6	0.24	0.25	NA	NA	NA	NA	-1.612145878	NA	NA	53.39	60.88	-1.00698164	-0.779557242	NA	NA	NA	NA	NA	NA	NA	NA
BRN	2006	Brunei Darussalam	NA	NA	NA	NA	NA	NA	NA	NA	NA	NA	NA	NA	NA	NA	NA	NA	NA	NA	0	NA	NA	NA	NA	-1.1	1.12	0.87	0.12	0.21	NA	NA	NA	NA	-1.364217568	NA	NA	64.29	71.49	-0.500047889	-0.147905022	NA	NA	NA	NA	NA	NA	NA	NA
BRN	2007	Brunei Darussalam	NA	NA	NA	NA	NA	NA	NA	NA	NA	NA	NA	NA	NA	NA	NA	NA	NA	NA	0	NA	NA	NA	NA	-1.06	1.11	0.92	0.41	0.21	NA	NA	NA	NA	-1.116289259	NA	NA	71.12	74.52	-0.182400411	0.032481993	NA	NA	NA	NA	NA	NA	NA	NA
BRN	2008	Brunei Darussalam	NA	NA	NA	NA	NA	NA	NA	NA	NA	NA	NA	NA	NA	NA	NA	NA	NA	NA	0	NA	NA	NA	NA	-1.02	1.13	0.89	0.47	0.49	NA	NA	NA	NA	-0.868360949	NA	NA	96.99	94.32	1.020753362	1.211248623	NA	NA	NA	NA	NA	NA	NA	NA
BRN	2009	Brunei Darussalam	NA	NA	NA	NA	NA	NA	NA	NA	NA	NA	NA	NA	NA	NA	NA	NA	NA	NA	0	NA	NA	NA	NA	-0.73	1.39	0.92	0.79	0.99	NA	NA	NA	NA	-0.62043264	NA	NA	61.76	64.02	-0.617712328	-0.592621524	NA	NA	NA	NA	NA	NA	NA	NA
BRN	2010	Brunei Darussalam	NA	NA	NA	NA	NA	NA	NA	NA	NA	NA	NA	NA	NA	NA	NA	NA	NA	NA	0	NA	NA	NA	NA	-0.65	1.28	0.9	0.78	0.86	0.289933943	0.000163897	0.000493925	-0.253273727	-0.372504331	-0.252202521	-0.073148754	79.04	79.04	0.185940443	0.301574173	NA	NA	NA	NA	NA	NA	NA	NA
BRN	2011	Brunei Darussalam	NA	NA	NA	NA	NA	NA	NA	NA	NA	NA	NA	NA	NA	NA	NA	NA	NA	NA	0	NA	NA	NA	NA	-0.61	1.09	0.9	0.85	0.86	0.471368712	0.000265112	0.000563165	-0.22894625	-0.124576021	-0.240448264	-0.072946816	104.01	93.67	1.3472373	1.172551738	NA	NA	NA	NA	NA	NA	NA	NA
BRN	2012	Brunei Darussalam	NA	NA	NA	NA	NA	NA	NA	NA	NA	NA	NA	NA	NA	NA	NA	NA	NA	NA	0	NA	NA	NA	NA	-0.51	0.91	0.84	0.79	0.55	0.436037981	0.000243733	0.000504674	-0.233683531	0.123352288	-0.242931044	-0.073117406	105.01	95.27	1.393744984	1.267805608	NA	NA	NA	NA	NA	NA	NA	NA
BRN	2013	Brunei Darussalam	NA	NA	NA	NA	NA	NA	NA	NA	NA	NA	NA	NA	NA	NA	NA	NA	NA	NA	0	NA	NA	NA	NA	-0.51	1.07	0.87	0.59	0.65	0.377918314	0.000210188	0.0004683	-0.241476442	0.371280598	-0.246826648	-0.073223489	104.08	94.83	1.350492838	1.241610794	NA	NA	NA	NA	NA	NA	NA	NA
BRN	2014	Brunei Darussalam	NA	NA	NA	NA	NA	NA	NA	NA	NA	NA	NA	NA	NA	NA	NA	NA	NA	NA	0	NA	NA	NA	NA	-0.63	1.26	1.09	0.47	0.53	0.280772882	0.000154781	0.000375365	-0.254502077	0.619208907	-0.25326118	-0.073494537	96.24	88.9	0.985872599	0.888576141	NA	NA	NA	NA	NA	NA	NA	NA
BRN	2015	Brunei Darussalam	NA	NA	NA	NA	NA	NA	NA	NA	NA	NA	NA	NA	NA	NA	NA	NA	NA	NA	0	NA	NA	NA	NA	-0.75	1.24	1.06	0.41	0.57	0.077581784	4.25E-05	0.00014314	-0.281746727	0.867137216	-0.266304777	-0.074171824	50.75	51.86	-1.129761924	-1.316550929	NA	NA	NA	NA	NA	NA	NA	NA
BRN	2016	Brunei Darussalam	NA	NA	NA	NA	NA	NA	NA	NA	NA	NA	NA	NA	NA	NA	NA	NA	NA	NA	0	NA	NA	NA	NA	-0.9	1.15	1.08	0.56	0.57	0.020368873	1.11E-05	4.84E-05	-0.289418056	1.115065526	-0.269949924	-0.074448186	42.81	45.53	-1.499032931	-1.693399049	NA	NA	NA	NA	NA	NA	NA	NA
BRN	2017	Brunei Darussalam	NA	NA	NA	NA	NA	NA	NA	NA	NA	NA	NA	NA	NA	NA	NA	NA	NA	NA	0	NA	NA	NA	NA	-0.95	1.16	1.14	0.65	0.71	0.074058735	4.01E-05	0.000155259	-0.282219111	1.362993835	-0.266582212	-0.074136477	52.81	54.28	-1.033956096	-1.172479452	NA	NA	NA	NA	NA	NA	NA	NA
BRN	2018	Brunei Darussalam	NA	NA	NA	NA	NA	NA	NA	NA	NA	NA	NA	NA	NA	NA	NA	NA	NA	NA	0	NA	NA	NA	NA	-0.84	1.2	1.25	0.63	0.8	NA	NA	NA	NA	1.610922145	NA	NA	68.35	67.1	-0.311226694	-0.409257826	NA	NA	NA	NA	NA	NA	NA	NA
BTN	2005	Bhutan	0	0	0.16	0.182	0.137	0.794	0.429	0.472	0.866	0.567	0.234	0.622	-1.725	-0.145	-1.164	0.44	0	0.575	0	0	5	-5	-5	-1.07	1.28	0.32	0.31	0.82	NA	NA	NA	NA	-1.612145878	NA	NA	53.39	60.88	-1.00698164	-0.779557242	-0.539397625	-0.186964215	-0.918480846	-1.437890505	-1.197417698	-1.053699507	-1.207527905	0.40181363
BTN	2006	Bhutan	0	0	0.153	0.159	0.137	0.794	0.428	0.501	0.847	0.612	0.234	0.622	-1.725	-0.085	-1.142	0.44	0	0.575	0	0	5	-5	-5	-1.06	1.26	0.24	0.19	0.82	NA	NA	NA	NA	-1.364217568	NA	NA	64.29	71.49	-0.500047889	-0.147905022	-0.539397625	-0.186964215	-0.918480846	-1.437890505	-1.220509392	-1.131661534	-1.207527905	0.40181363
BTN	2007	Bhutan	0	0	0.153	0.159	0.137	0.762	0.556	0.501	0.847	0.684	0.234	0.622	-2.021	0.127	-0.851	0.44	0	0.575	0	0	5	-5	-5	-0.87	0.57	0.3	0.34	0.88	NA	NA	NA	NA	-1.116289259	NA	NA	71.12	74.52	-0.182400411	0.032481993	-0.539397625	-0.186964215	-1.182654946	-1.437890505	-1.220509392	-1.131661534	-1.207527905	0.282207339
BTN	2008	Bhutan	1	3	0.144	0.136	0.123	0.818	0.603	0.588	0.879	0.758	0.14	0.622	-2.021	0.815	0.904	0.489	0	1.277	0	3	0	3	3	-0.51	0.72	0.28	0.38	0.86	NA	NA	NA	NA	-0.868360949	NA	NA	96.99	94.32	1.020753362	1.211248623	-0.606676304	-0.186964215	-1.182654946	-0.157856952	-1.250198714	-1.209623561	-1.253874196	0.491518349
BTN	2009	Bhutan	2	5	0.143	0.128	0.127	0.818	0.713	0.601	0.919	0.738	0.14	0.622	-2.021	0.81	0.897	0.489	0	1.537	0	3	0	3	3	-0.46	0.8	0.49	0.21	0.91	NA	NA	NA	NA	-0.62043264	NA	NA	61.76	64.02	-0.617712328	-0.592621524	-0.606676304	-0.186964215	-1.182654946	-0.157856952	-1.253497527	-1.236740787	-1.240632398	0.491518349
BTN	2010	Bhutan	2	5	0.143	0.128	0.127	0.826	0.728	0.583	0.907	0.779	0.158	0.622	-2.383	0.795	0.896	0.509	0	1.193	0	3	0	3	3	-0.42	0.74	0.58	0.16	0.91	0	0	0	-0.292149193	-0.372504331	-0.271236208	-0.074589294	79.04	79.04	0.185940443	0.301574173	-0.593793153	-0.186964215	-1.505732731	-0.157856952	-1.253497527	-1.236740787	-1.240632398	0.521419922
BTN	2011	Bhutan	2	5	0.143	0.128	0.127	0.796	0.716	0.644	0.917	0.77	0.158	0.622	-2.383	0.785	0.903	0.509	0	1.193	0	3	0	3	3	-0.4	0.83	0.63	0.2	0.84	0	0	0	-0.292149193	-0.124576021	-0.271236208	-0.074589294	104.01	93.67	1.3472373	1.172551738	-0.593793153	-0.186964215	-1.505732731	-0.157856952	-1.253497527	-1.236740787	-1.240632398	0.409289023
BTN	2012	Bhutan	2	5	0.143	0.128	0.127	0.796	0.718	0.593	0.898	0.756	0.158	0.622	-2.383	0.778	0.9	0.473	0	1.193	0	3	0	3	3	-0.28	0.78	0.51	0.24	0.94	0	0	0	-0.292149193	0.123352288	-0.271236208	-0.074589294	105.01	95.27	1.393744984	1.267805608	-0.593793153	-0.186964215	-1.505732731	-0.157856952	-1.253497527	-1.236740787	-1.240632398	0.409289023
BTN	2013	Bhutan	2	5	0.094	0.061	0.151	0.839	0.713	0.613	0.93	0.771	0.654	0.622	-2.231	0.961	1.035	0.616	0	1.139	0	6	1	5	5	-0.16	0.78	0.4	0.29	0.9	0	0	0	-0.292149193	0.371280598	-0.271236208	-0.074589294	104.08	94.83	1.350492838	1.241610794	-0.238790762	-0.186964215	-1.370075761	0.162151437	-1.415139389	-1.463847561	-1.161181613	0.570009978
BTN	2014	Bhutan	2	7	0.094	0.061	0.151	0.843	0.739	0.63	0.928	0.749	0.654	0.622	-2.231	0.957	1.031	0.616	0	1.069	0	6	1	5	5	-0.1	1.07	0.26	0.38	1.28	0	0	0	-0.292149193	0.619208907	-0.271236208	-0.074589294	96.24	88.9	0.985872599	0.888576141	-0.238790762	-0.186964215	-1.370075761	0.162151437	-1.415139389	-1.463847561	-1.161181613	0.584960764
BTN	2015	Bhutan	2	7	0.094	0.061	0.151	0.846	0.723	0.641	0.928	0.77	0.654	0.622	-2.231	0.951	1.028	0.616	0	1.069	0	6	1	5	5	-0.03	0.97	0.41	0.52	1.02	0	0	0	-0.292149193	0.867137216	-0.271236208	-0.074589294	50.75	51.86	-1.129761924	-1.316550929	-0.238790762	-0.186964215	-1.370075761	0.162151437	-1.415139389	-1.463847561	-1.161181613	0.596173854
BTN	2016	Bhutan	3	8	0.093	0.04	0.171	0.849	0.68	0.644	0.951	0.71	0.625	0.622	-2.161	0.932	1.023	0.568	0	1.069	0	6	1	5	5	-0.03	1.12	0.5	0.49	1.13	0	0	0	-0.292149193	1.115065526	-0.271236208	-0.074589294	42.81	45.53	-1.499032931	-1.693399049	-0.25954695	-0.186964215	-1.307602156	0.162151437	-1.418438203	-1.535030282	-1.094972626	0.607386944
BTN	2017	Bhutan	3	8	0.089	0.04	0.164	0.852	0.677	0.664	0.941	0.736	1.198	0.622	-2.149	0.959	1.025	0.573	0	1.069	0	6	1	5	5	0.01	1.12	0.57	0.63	1.57	0	0	0	-0.292149193	1.362993835	-0.271236208	-0.074589294	52.81	54.28	-1.033956096	-1.172479452	0.150566699	-0.186964215	-1.296892395	0.162151437	-1.431633457	-1.535030282	-1.118145772	0.618600034
BTN	2018	Bhutan	3	8	0.091	0.042	0.166	0.886	0.726	0.641	0.936	0.744	1.211	0.622	-2.092	1.021	1.125	0.695	0	1.423	0	7	0	7	7	0.06	1.1	0.36	0.55	1.65	NA	NA	NA	NA	1.610922145	NA	NA	68.35	67.1	-0.311226694	-0.409257826	0.159871197	-0.186964215	-1.246021031	0.482159825	-1.42503583	-1.528250975	-1.111524873	0.745681718
BWA	2005	Botswana	3	8	0.176	0.21	0.164	0.873	0.907	0.894	0.922	0.896	2.362	1.522	-1.521	1.288	1.231	0.893	0	NA	0	8	0	8	8	0.59	1.06	0.65	0.64	1.16	NA	NA	NA	NA	-1.612145878	NA	NA	53.39	60.88	-1.00698164	-0.779557242	0.983677148	0.720353312	-0.736414912	0.642164019	-1.144636681	-0.958789213	-1.118145772	0.697091663
BWA	2006	Botswana	3	8	0.176	0.21	0.164	0.873	0.907	0.894	0.916	0.896	2.362	1.522	-1.521	1.293	1.225	0.893	0	NA	0	8	0	8	8	0.51	1.02	0.51	0.62	0.97	NA	NA	NA	NA	-1.364217568	NA	NA	64.29	71.49	-0.500047889	-0.147905022	0.983677148	0.720353312	-0.736414912	0.642164019	-1.144636681	-0.958789213	-1.118145772	0.697091663
BWA	2007	Botswana	3	8	0.176	0.21	0.164	0.873	0.917	0.894	0.916	0.887	2.362	1.522	-1.521	1.293	1.22	0.893	0	NA	0	8	0	8	8	0.51	1.06	0.6	0.65	1	NA	NA	NA	NA	-1.116289259	NA	NA	71.12	74.52	-0.182400411	0.032481993	0.983677148	0.720353312	-0.736414912	0.642164019	-1.144636681	-0.958789213	-1.118145772	0.697091663
BWA	2008	Botswana	3	8	0.179	0.201	0.183	0.873	0.908	0.894	0.921	0.889	2.362	1.522	-1.521	1.29	1.227	0.891	0	NA	0	8	0	8	8	0.51	1.03	0.57	0.7	1.04	NA	NA	NA	NA	-0.868360949	NA	NA	96.99	94.32	1.020753362	1.211248623	0.983677148	0.720353312	-0.736414912	0.642164019	-1.134740241	-0.989296094	-1.055247234	0.697091663
BWA	2009	Botswana	3	8	0.178	0.203	0.183	0.873	0.914	0.894	0.921	0.889	2.362	1.522	-1.521	1.246	1.106	0.905	0	NA	0	8	0	8	8	0.44	0.95	0.47	0.67	0.96	NA	NA	NA	NA	-0.62043264	NA	NA	61.76	64.02	-0.617712328	-0.592621524	0.983677148	0.720353312	-0.736414912	0.642164019	-1.138039054	-0.982516787	-1.055247234	0.697091663
BWA	2010	Botswana	3	8	0.179	0.2	0.183	0.889	0.916	0.893	0.924	0.873	2.506	1.521	-1.521	1.25	1.105	0.936	0	NA	0	8	0	8	8	0.46	0.99	0.45	0.67	1.03	0.063929271	7.20E-05	0.000121078	-0.283577309	-0.372504331	-0.262875588	-0.074236167	79.04	79.04	0.185940443	0.301574173	1.086742359	0.719345182	-0.736414912	0.642164019	-1.134740241	-0.992685747	-1.055247234	0.756894808
BWA	2011	Botswana	3	8	0.179	0.2	0.183	0.886	0.918	0.893	0.924	0.884	2.506	1.521	-1.521	1.253	1.105	0.936	0	NA	0	8	0	8	8	0.43	1.06	0.46	0.67	1	0.087012654	9.48E-05	0.000127398	-0.2804822	-0.124576021	-0.260228638	-0.074217736	104.01	93.67	1.3472373	1.172551738	1.086742359	0.719345182	-0.736414912	0.642164019	-1.134740241	-0.992685747	-1.055247234	0.745681718
BWA	2012	Botswana	3	8	0.181	0.234	0.218	0.858	0.925	0.898	0.912	0.875	2.506	1.521	-1.521	1.226	1.104	0.936	0	NA	0	8	0	8	8	0.53	1.1	0.48	0.66	0.93	0.09077532	9.73E-05	0.000128033	-0.279977687	0.123352288	-0.259937264	-0.074215884	105.01	95.27	1.393744984	1.267805608	1.086742359	0.719345182	-0.736414912	0.642164019	-1.128142614	-0.877437533	-0.939381506	0.641026213
BWA	2013	Botswana	3	8	0.149	0.228	0.211	0.85	0.923	0.908	0.916	0.801	2.57	1.521	-1.911	1.23	1.11	0.942	0	NA	0	8	0	8	8	0.49	1.1	0.41	0.6	0.92	0.092099731	9.64E-05	0.000139123	-0.279800105	0.371280598	-0.2600365	-0.074183538	104.08	94.83	1.350492838	1.241610794	1.132549119	0.719345182	-1.084482139	0.642164019	-1.233704646	-0.897775453	-0.962554651	0.61112464
BWA	2014	Botswana	3	8	0.151	0.228	0.211	0.85	0.905	0.883	0.901	0.801	2.57	1.521	-1.911	1.317	1.238	0.942	0	NA	0	8	0	8	8	0.44	1.01	0.35	0.63	0.85	0.143240947	0.000145128	0.000199778	-0.272942892	0.619208907	-0.254382257	-0.074006638	96.24	88.9	0.985872599	0.888576141	1.132549119	0.719345182	-1.084482139	0.642164019	-1.227107019	-0.897775453	-0.962554651	0.61112464
BWA	2015	Botswana	3	8	0.167	0.255	0.209	0.896	0.897	0.899	0.85	0.822	1.999	2.022	-1.858	1.299	1.242	0.921	0	NA	0	8	0	8	8	0.44	1.04	0.5	0.6	0.85	0.093396654	9.28E-05	0.000147546	-0.279626208	0.867137216	-0.260454563	-0.074158973	50.75	51.86	-1.129761924	-1.316550929	0.723866931	1.224418605	-1.037180695	0.642164019	-1.174326003	-0.806254813	-0.96917555	0.783058685
BWA	2016	Botswana	3	8	0.166	0.255	0.209	0.873	0.91	0.9	0.85	0.822	1.99	2.022	-1.858	1.287	1.222	0.932	0	NA	0	8	0	8	8	0.39	0.99	0.53	0.53	0.93	0.094015319	9.23E-05	0.000136057	-0.279543255	1.115065526	-0.260521604	-0.074192482	42.81	45.53	-1.499032931	-1.693399049	0.717425355	1.224418605	-1.037180695	0.642164019	-1.177624817	-0.806254813	-0.96917555	0.697091663
BWA	2017	Botswana	2	7	0.142	0.234	0.197	0.871	0.868	0.885	0.867	0.842	1.079	2.022	-1.667	1.174	1.194	0.71	0	NA	0	8	0	8	8	0.39	1.02	0.44	0.52	0.8	0.094697446	9.16E-05	0.000123304	-0.279451793	1.362993835	-0.260600426	-0.074229676	52.81	54.28	-1.033956096	-1.172479452	0.065394754	1.224418605	-0.866717002	0.642164019	-1.256796341	-0.877437533	-1.008900942	0.689616269
BWA	2018	Botswana	2	7	0.168	0.249	0.22	0.878	0.873	0.88	0.892	0.834	1.31	1.723	-1.739	1.187	1.178	0.805	0	NA	0	8	0	8	8	0.47	0.98	0.33	0.47	0.75	NA	NA	NA	NA	1.610922145	NA	NA	68.35	67.1	-0.311226694	-0.409257826	0.230728529	0.92298756	-0.930975567	0.642164019	-1.17102719	-0.826592733	-0.932760607	0.715780146
CAF	2005	Central African Republic	1	3	0.94	0.924	0.906	0.35	0.577	0.42	0.132	0.527	-0.525	1.604	1.722	0.243	0.257	0.6	0	0.117	0	1	2	-1	-1	-0.99	-1.43	-1.56	-1.45	-1.28	NA	NA	NA	NA	-1.612145878	NA	NA	53.39	60.88	-1.00698164	-0.779557242	-1.082637171	0.80302002	2.157897954	-0.797873729	1.375656839	1.461423273	1.338207661	-1.257723665
CAF	2006	Central African Republic	1	3	0.94	0.924	0.906	0.35	0.566	0.42	0.14	0.527	-0.525	1.604	1.722	0.234	0.258	0.617	0	0.117	0	1	2	-1	-1	-1.01	-1.85	-1.5	-1.54	-1.21	NA	NA	NA	NA	-1.364217568	NA	NA	64.29	71.49	-0.500047889	-0.147905022	-1.082637171	0.80302002	2.157897954	-0.797873729	1.375656839	1.461423273	1.338207661	-1.257723665
CAF	2007	Central African Republic	1	3	0.94	0.924	0.906	0.35	0.566	0.42	0.14	0.527	-0.525	1.604	1.722	0.23	0.26	0.617	0	0.117	0	1	2	-1	-1	-1.08	-1.85	-1.54	-1.57	-1.19	NA	NA	NA	NA	-1.116289259	NA	NA	71.12	74.52	-0.182400411	0.032481993	-1.082637171	0.80302002	2.157897954	-0.797873729	1.375656839	1.461423273	1.338207661	-1.257723665
CAF	2008	Central African Republic	1	3	0.94	0.924	0.906	0.35	0.566	0.42	0.14	0.527	-0.525	1.604	1.722	0.235	0.255	0.617	0	0.117	0	1	2	-1	-1	-0.99	-1.84	-1.37	-1.41	-1.12	NA	NA	NA	NA	-0.868360949	NA	NA	96.99	94.32	1.020753362	1.211248623	-1.082637171	0.80302002	2.157897954	-0.797873729	1.375656839	1.461423273	1.338207661	-1.257723665
CAF	2009	Central African Republic	1	3	0.94	0.924	0.906	0.35	0.566	0.42	0.14	0.527	-0.525	1.604	1.722	0.225	0.255	0.617	0	0.117	0	1	2	-1	-1	-1	-1.91	-1.41	-1.31	-0.98	NA	NA	NA	NA	-0.62043264	NA	NA	61.76	64.02	-0.617712328	-0.592621524	-1.082637171	0.80302002	2.157897954	-0.797873729	1.375656839	1.461423273	1.338207661	-1.257723665
CAF	2010	Central African Republic	1	3	0.94	0.924	0.906	0.355	0.537	0.415	0.133	0.504	-0.525	2.087	1.722	0.21	0.256	0.617	0	0.063	0	1	2	-1	-1	-1.1	-2.02	-1.39	-1.29	-0.93	0	0	0	-0.292149193	-0.372504331	-0.271236208	-0.074589294	79.04	79.04	0.185940443	0.301574173	-1.082637171	1.289947093	2.157897954	-0.797873729	1.375656839	1.461423273	1.338207661	-1.239035182
CAF	2011	Central African Republic	1	3	0.94	0.924	0.906	0.355	0.537	0.415	0.11	0.504	-0.525	2.087	1.722	0.16	0.148	0.617	0	0.063	0	1	2	-1	-1	-1.09	-1.79	-1.28	-1.29	-0.95	0	0	0	-0.292149193	-0.124576021	-0.271236208	-0.074589294	104.01	93.67	1.3472373	1.172551738	-1.082637171	1.289947093	2.157897954	-0.797873729	1.375656839	1.461423273	1.338207661	-1.239035182
CAF	2012	Central African Republic	1	3	0.94	0.924	0.906	0.331	0.537	0.43	0.119	0.504	-0.525	0.898	1.515	0.143	0.152	0.617	0	0.063	0	1	2	-1	-1	-1.24	-1.85	-1.45	-1.44	-0.99	0	0	0	-0.292149193	0.123352288	-0.271236208	-0.074589294	105.01	95.27	1.393744984	1.267805608	-1.082637171	0.091279827	1.97315458	-0.797873729	1.375656839	1.461423273	1.338207661	-1.328739901
CAF	2013	Central African Republic	1	3	0.91	0.882	0.896	0.168	0.48	0.217	0.106	0.366	-1.12	-0.445	1.846	0.116	0.229	0.531	0	0.658	0	-77	-77	-77	0	-1.47	-2.15	-1.61	-1.79	-1.09	0	0	0	-0.292149193	0.371280598	-0.271236208	-0.074589294	104.08	94.83	1.350492838	1.241610794	-1.508496894	-1.26263955	2.268565483	-0.637869534	1.276692434	1.319057832	1.305103167	-1.937984448
CAF	2014	Central African Republic	1	3	0.865	0.756	0.843	0.248	0.58	0.236	0.172	0.556	-1.12	-0.605	1.846	0.308	-0.616	0.568	0	0.495	0	-77	-77	-77	0	-1.39	-2.7	-1.85	-1.7	-1.16	0	0	0	-0.292149193	0.619208907	-0.271236208	-0.074589294	96.24	88.9	0.985872599	0.888576141	-1.508496894	-1.423940443	2.268565483	-0.637869534	1.128245826	0.891961511	1.129649351	-1.638968719
CAF	2015	Central African Republic	1	3	0.858	0.727	0.843	0.335	0.638	0.315	0.168	0.66	-0.951	-0.605	1.203	0.466	0.442	0.576	0	0.495	0	-77	-77	-77	0	-1.23	-1.9	-1.78	-1.68	-1.31	0	0	0	-0.292149193	0.867137216	-0.271236208	-0.074589294	50.75	51.86	-1.129761924	-1.316550929	-1.387538418	-1.423940443	1.694700798	-0.637869534	1.105154131	0.793661564	1.129649351	-1.313789114
CAF	2016	Central African Republic	1	3	0.822	0.582	0.843	0.335	0.642	0.355	0.235	0.66	-0.902	1.314	1.203	0.507	0.5	0.568	0	0.723	0	7	1	6	6	-1.09	-1.79	-1.77	-1.82	-1.28	0	0	0	-0.292149193	1.115065526	-0.271236208	-0.074589294	42.81	45.53	-1.499032931	-1.693399049	-1.352467617	0.510662151	1.694700798	0.322155631	0.986396845	0.30216183	1.129649351	-1.313789114
CAF	2017	Central African Republic	1	3	0.808	0.659	0.852	0.349	0.65	0.37	0.248	0.636	0.006	1.314	1.438	0.502	0.494	0.57	0	0.878	0	7	1	6	6	-1.11	-2.01	-1.77	-1.73	-1.17	0	0	0	-0.292149193	1.362993835	-0.271236208	-0.074589294	52.81	54.28	-1.033956096	-1.172479452	-0.702584208	0.510662151	1.904433614	0.322155631	0.940213456	0.563165137	1.159443395	-1.261461362
CAF	2018	Central African Republic	1	3	0.798	0.707	0.803	0.325	0.708	0.331	0.288	0.653	0.238	1.314	1.099	0.579	0.446	0.706	0	0.388	0	7	1	6	6	-1.19	-2.28	-1.72	-1.69	-1.23	NA	NA	NA	NA	1.610922145	NA	NA	68.35	67.1	-0.311226694	-0.409257826	-0.536534703	0.510662151	1.601882871	0.322155631	0.907225321	0.725868497	0.997231376	-1.35116608
CAN	2005	Canada	3	9	0.038	0.04	0.04	0.941	0.952	0.953	0.98	0.969	1.708	2.024	-1.336	1.643	1.448	0.865	0	1.613	1	10	0	10	10	1.51	0.83	1.89	1.66	1.88	NA	NA	NA	NA	-1.612145878	NA	NA	53.39	60.88	-1.00698164	-0.779557242	0.515589318	1.226434866	-0.571306099	0.962172408	-1.599872946	-1.535030282	-1.528641494	0.951255032
CAN	2006	Canada	3	9	0.038	0.04	0.04	0.941	0.949	0.953	0.983	0.97	1.564	2.024	-1.336	1.704	1.534	0.866	0	1.613	0	10	0	10	10	1.42	1.04	1.9	1.81	1.96	NA	NA	NA	NA	-1.364217568	NA	NA	64.29	71.49	-0.500047889	-0.147905022	0.412524108	1.226434866	-0.571306099	0.962172408	-1.599872946	-1.535030282	-1.528641494	0.951255032
CAN	2007	Canada	3	9	0.031	0.04	0.015	0.941	0.951	0.961	0.986	0.964	1.564	2.024	-1.336	1.686	1.536	0.866	0	1.613	0	10	0	10	10	1.38	1.01	1.76	1.81	2	NA	NA	NA	NA	-1.116289259	NA	NA	71.12	74.52	-0.182400411	0.032481993	0.412524108	1.226434866	-0.571306099	0.962172408	-1.62296464	-1.535030282	-1.611402728	0.951255032
CAN	2008	Canada	3	9	0.033	0.04	0.015	0.941	0.951	0.961	0.988	0.966	1.564	2.024	-1.336	1.686	1.533	0.866	0	1.613	0	10	0	10	10	1.41	1.04	1.79	1.81	2	NA	NA	NA	NA	-0.868360949	NA	NA	96.99	94.32	1.020753362	1.211248623	0.412524108	1.226434866	-0.571306099	0.962172408	-1.616367013	-1.535030282	-1.611402728	0.951255032
CAN	2009	Canada	3	9	0.033	0.04	0.015	0.941	0.947	0.961	0.987	0.964	1.564	2.024	-1.336	1.694	1.531	0.866	0	1.613	0	10	0	10	10	1.4	1.13	1.75	1.8	2.06	NA	NA	NA	NA	-0.62043264	NA	NA	61.76	64.02	-0.617712328	-0.592621524	0.412524108	1.226434866	-0.571306099	0.962172408	-1.616367013	-1.535030282	-1.611402728	0.951255032
CAN	2010	Canada	3	9	0.028	0.025	0.015	0.941	0.95	0.961	0.985	0.97	1.754	2.024	-1.336	1.708	1.533	0.879	0	1.398	0	10	0	10	10	1.35	0.94	1.78	1.81	2.07	1.372304468	0.000886502	0.006896002	-0.108145293	-0.372504331	-0.168285054	-0.054477004	79.04	79.04	0.185940443	0.301574173	0.548512927	1.226434866	-0.571306099	0.962172408	-1.632861081	-1.585875082	-1.611402728	0.951255032
CAN	2011	Canada	3	9	0.028	0.025	0.015	0.941	0.95	0.961	0.985	0.97	1.754	2.024	-1.336	1.688	1.478	0.879	0	1.398	0	10	0	10	10	1.38	1.08	1.78	1.74	1.98	0.57852322	0.000370611	0.002332755	-0.214578558	-0.124576021	-0.228196473	-0.06778578	104.01	93.67	1.3472373	1.172551738	0.548512927	1.226434866	-0.571306099	0.962172408	-1.632861081	-1.585875082	-1.611402728	0.951255032
CAN	2012	Canada	3	9	0.028	0.025	0.015	0.941	0.952	0.968	0.985	0.965	1.754	2.024	-1.336	1.713	1.478	0.879	0	1.398	0	10	0	10	10	1.44	1.11	1.77	1.76	1.93	0.725990076	0.00046007	0.002781571	-0.194805631	0.123352288	-0.217807413	-0.066476801	105.01	95.27	1.393744984	1.267805608	0.548512927	1.226434866	-0.571306099	0.962172408	-1.632861081	-1.585875082	-1.611402728	0.951255032
CAN	2013	Canada	3	9	0.022	0.025	0.017	0.954	0.954	0.935	0.982	0.963	1.602	2.024	-1.02	1.639	1.444	0.91	0	1.533	0	10	0	10	10	1.45	1.06	1.79	1.76	1.89	0.977929829	0.000615437	0.003662659	-0.161024573	0.371280598	-0.199764281	-0.063907097	104.08	94.83	1.350492838	1.241610794	0.439721872	1.226434866	-0.289282397	0.962172408	-1.652653962	-1.585875082	-1.604781829	0.999845088
CAN	2014	Canada	3	9	0.022	0.025	0.017	0.954	0.951	0.935	0.984	0.958	1.602	2.024	-1.02	1.637	1.43	0.91	0	1.533	0	10	0	10	10	1.41	1.18	1.76	1.89	1.84	1.111156074	0.000692309	0.00437463	-0.143161081	0.619208907	-0.190837008	-0.061830622	96.24	88.9	0.985872599	0.888576141	0.439721872	1.226434866	-0.289282397	0.962172408	-1.652653962	-1.585875082	-1.604781829	0.999845088
CAN	2015	Canada	3	9	0.023	0.025	0.017	0.956	0.953	0.932	0.983	0.957	1.9	2.024	-0.902	1.632	1.436	0.92	0	1.533	0	10	0	10	10	1.47	1.27	1.76	1.84	1.89	0.540327479	0.000332919	0.002874082	-0.219699991	0.867137216	-0.232573681	-0.066206991	50.75	51.86	-1.129761924	-1.316550929	0.653009599	1.226434866	-0.183969748	0.962172408	-1.649355148	-1.585875082	-1.604781829	1.007320481
CAN	2016	Canada	3	9	0.022	0.025	0.017	0.957	0.958	0.927	0.983	0.957	2.22	2.024	-0.9	1.685	1.48	0.93	0	1.533	0	10	0	10	10	1.45	1.26	1.78	1.84	1.99	0.570699022	0.000347141	0.003153033	-0.215627657	1.115065526	-0.230922104	-0.065393427	42.81	45.53	-1.499032931	-1.693399049	0.882043399	1.226434866	-0.182184788	0.962172408	-1.652653962	-1.585875082	-1.604781829	1.011058178
CAN	2017	Canada	3	9	0.029	0.044	0.026	0.937	0.951	0.902	0.978	0.965	2.158	2.024	-1.363	1.611	1.476	0.912	0	2.015	0	10	0	10	10	1.48	1.1	1.85	1.8	1.92	0.580574511	0.000350588	0.002791224	-0.214303513	1.362993835	-0.230521687	-0.06644865	52.81	54.28	-1.033956096	-1.172479452	0.8376681	1.226434866	-0.595403061	0.962172408	-1.629562267	-1.521471668	-1.574987785	0.936304246
CAN	2018	Canada	3	9	0.031	0.042	0.026	0.96	0.953	0.923	0.974	0.958	2.159	2.024	-0.797	1.585	1.475	0.897	0	1.995	0	10	0	10	10	1.52	0.99	1.72	1.77	1.87	NA	NA	NA	NA	1.610922145	NA	NA	68.35	67.1	-0.311226694	-0.409257826	0.838383831	1.226434866	-0.090259341	0.962172408	-1.62296464	-1.528250975	-1.574987785	1.022271268
CHE	2005	Switzerland	3	9	0.02	0.015	0.028	0.971	0.984	0.914	0.994	0.991	2.897	2.137	-2.534	1.894	1.433	0.95	1	NA	0	10	0	10	10	1.59	1.2	1.85	1.91	2.02	NA	NA	NA	NA	-1.612145878	NA	NA	53.39	60.88	-1.00698164	-0.779557242	1.366593034	1.340353623	-1.640497222	0.962172408	-1.659251589	-1.619771615	-1.568366886	1.06338593
CHE	2006	Switzerland	3	9	0.02	0.015	0.028	0.971	0.984	0.914	0.994	0.991	2.897	2.137	-2.534	1.903	1.435	0.95	1	NA	0	10	0	10	10	1.52	1.27	2.08	1.82	2.09	NA	NA	NA	NA	-1.364217568	NA	NA	64.29	71.49	-0.500047889	-0.147905022	1.366593034	1.340353623	-1.640497222	0.962172408	-1.659251589	-1.619771615	-1.568366886	1.06338593
CHE	2007	Switzerland	3	9	0.02	0.015	0.028	0.971	0.984	0.914	0.994	0.991	2.897	2.137	-2.534	1.933	1.5	0.95	1	NA	0	10	0	10	10	1.5	1.23	2.04	1.85	2.15	NA	NA	NA	NA	-1.116289259	NA	NA	71.12	74.52	-0.182400411	0.032481993	1.366593034	1.340353623	-1.640497222	0.962172408	-1.659251589	-1.619771615	-1.568366886	1.06338593
CHE	2008	Switzerland	3	9	0.02	0.015	0.028	0.971	0.984	0.914	0.994	0.991	2.897	2.137	-2.534	1.931	1.496	0.95	1	NA	0	10	0	10	10	1.52	1.22	2.04	1.82	2.12	NA	NA	NA	NA	-0.868360949	NA	NA	96.99	94.32	1.020753362	1.211248623	1.366593034	1.340353623	-1.640497222	0.962172408	-1.659251589	-1.619771615	-1.568366886	1.06338593
CHE	2009	Switzerland	3	9	0.02	0.015	0.028	0.971	0.984	0.905	0.994	0.991	2.897	2.137	-2.534	1.932	1.499	0.95	1	NA	0	10	0	10	10	1.55	1.31	1.95	1.75	2.07	NA	NA	NA	NA	-0.62043264	NA	NA	61.76	64.02	-0.617712328	-0.592621524	1.366593034	1.340353623	-1.640497222	0.962172408	-1.659251589	-1.619771615	-1.568366886	1.06338593
CHE	2010	Switzerland	3	9	0.02	0.015	0.028	0.971	0.984	0.922	0.994	0.991	2.897	2.137	-2.534	1.931	1.503	0.95	1	NA	0	10	0	10	10	1.58	1.26	1.88	1.76	2.07	0	0	0	-0.292149193	-0.372504331	-0.271236208	-0.074589294	79.04	79.04	0.185940443	0.301574173	1.366593034	1.340353623	-1.640497222	0.962172408	-1.659251589	-1.619771615	-1.568366886	1.06338593
CHE	2011	Switzerland	3	9	0.02	0.015	0.028	0.971	0.984	0.922	0.994	0.991	2.897	2.137	-2.534	1.976	1.586	0.95	1	NA	0	10	0	10	10	1.58	1.3	1.87	1.73	2.04	0	0	0	-0.292149193	-0.124576021	-0.271236208	-0.074589294	104.01	93.67	1.3472373	1.172551738	1.366593034	1.340353623	-1.640497222	0.962172408	-1.659251589	-1.619771615	-1.568366886	1.06338593
CHE	2012	Switzerland	3	9	0.02	0.015	0.028	0.971	0.984	0.922	0.994	0.991	2.897	2.137	-2.534	1.978	1.577	0.95	1	NA	0	10	0	10	10	1.64	1.42	1.89	1.82	2.15	0	0	0	-0.292149193	0.123352288	-0.271236208	-0.074589294	105.01	95.27	1.393744984	1.267805608	1.366593034	1.340353623	-1.640497222	0.962172408	-1.659251589	-1.619771615	-1.568366886	1.06338593
CHE	2013	Switzerland	3	9	0.022	0.017	0.03	0.955	0.979	0.915	0.994	0.983	2.629	2.137	-2.308	1.941	1.566	0.941	1	NA	0	10	0	10	10	1.63	1.4	1.82	1.8	2.13	0	0	0	-0.292149193	0.371280598	-0.271236208	-0.074589294	104.08	94.83	1.350492838	1.241610794	1.174777226	1.340353623	-1.438796726	0.962172408	-1.652653962	-1.612992308	-1.561745987	1.003582785
CHE	2014	Switzerland	3	9	0.022	0.017	0.03	0.955	0.979	0.915	0.994	0.983	2.629	2.137	-2.308	1.943	1.569	0.941	1	NA	0	10	0	10	10	1.56	1.4	2.11	1.99	2.15	0	0	0	-0.292149193	0.619208907	-0.271236208	-0.074589294	96.24	88.9	0.985872599	0.888576141	1.174777226	1.340353623	-1.438796726	0.962172408	-1.652653962	-1.612992308	-1.561745987	1.003582785
CHE	2015	Switzerland	3	9	0.019	0.019	0.012	0.965	0.976	0.927	0.993	0.979	2.535	2.137	-2.476	1.85	1.443	0.952	1	NA	0	10	0	10	10	1.56	1.34	2	1.95	2.14	0	0	0	-0.292149193	0.867137216	-0.271236208	-0.074589294	50.75	51.86	-1.129761924	-1.316550929	1.107498547	1.340353623	-1.588733378	0.962172408	-1.662550402	-1.606213002	-1.621334076	1.040959751
CHE	2016	Switzerland	3	9	0.019	0.019	0.012	0.965	0.972	0.912	0.993	0.979	2.535	2.137	-2.476	1.847	1.442	0.952	1	NA	0	10	0	10	10	1.53	1.31	2.01	1.95	1.99	0	0	0	-0.292149193	1.115065526	-0.271236208	-0.074589294	42.81	45.53	-1.499032931	-1.693399049	1.107498547	1.340353623	-1.588733378	0.962172408	-1.662550402	-1.606213002	-1.621334076	1.040959751
CHE	2017	Switzerland	3	9	0.02	0.019	0.018	0.967	0.976	0.92	0.995	0.979	2.535	2.137	-2.487	1.853	1.451	0.954	1	NA	0	10	0	10	10	1.56	1.26	2.06	1.93	1.99	0	0	0	-0.292149193	1.362993835	-0.271236208	-0.074589294	52.81	54.28	-1.033956096	-1.172479452	1.107498547	1.340353623	-1.598550659	0.962172408	-1.659251589	-1.606213002	-1.60147138	1.048435144
CHE	2018	Switzerland	3	9	0.022	0.022	0.02	0.957	0.972	0.91	0.993	0.981	2.535	2.137	-2.487	1.854	1.444	0.963	1	NA	0	10	0	10	10	1.62	1.34	2.04	1.93	2.01	NA	NA	NA	NA	1.610922145	NA	NA	68.35	67.1	-0.311226694	-0.409257826	1.107498547	1.340353623	-1.598550659	0.962172408	-1.652653962	-1.596044042	-1.594850481	1.011058178
CHL	2005	Chile	3	8	0.074	0.037	0.068	0.904	0.96	0.959	0.958	0.952	2.83	0.887	-1.667	1.762	1.661	0.941	0	NA	0	9	0	9	9	1.29	0.84	1.24	1.3	1.47	NA	NA	NA	NA	-1.612145878	NA	NA	53.39	60.88	-1.00698164	-0.779557242	1.318639082	0.08019039	-0.866717002	0.802168213	-1.481115659	-1.545199242	-1.435948911	0.812960257
CHL	2006	Chile	3	8	0.074	0.037	0.068	0.904	0.957	0.959	0.958	0.951	2.83	0.887	-1.667	1.776	1.659	0.941	0	NA	0	10	0	10	10	1.08	0.61	1.03	1.27	1.46	NA	NA	NA	NA	-1.364217568	NA	NA	64.29	71.49	-0.500047889	-0.147905022	1.318639082	0.08019039	-0.866717002	0.962172408	-1.481115659	-1.545199242	-1.435948911	0.812960257
CHL	2007	Chile	3	8	0.074	0.037	0.068	0.904	0.954	0.959	0.958	0.951	2.829	0.887	-1.667	1.809	1.663	0.95	0	NA	0	10	0	10	10	1.1	0.41	1.28	1.29	1.4	NA	NA	NA	NA	-1.116289259	NA	NA	71.12	74.52	-0.182400411	0.032481993	1.317923351	0.08019039	-0.866717002	0.962172408	-1.481115659	-1.545199242	-1.435948911	0.812960257
CHL	2008	Chile	3	8	0.074	0.037	0.068	0.904	0.954	0.966	0.964	0.951	2.829	0.887	-1.667	1.799	1.662	0.95	0	NA	0	10	0	10	10	1.01	0.43	1.17	1.31	1.38	NA	NA	NA	NA	-0.868360949	NA	NA	96.99	94.32	1.020753362	1.211248623	1.317923351	0.08019039	-0.866717002	0.962172408	-1.481115659	-1.545199242	-1.435948911	0.812960257
CHL	2009	Chile	3	8	0.074	0.037	0.068	0.904	0.956	0.966	0.964	0.951	2.829	0.887	-1.667	1.799	1.677	0.95	0	NA	0	10	0	10	10	1.02	0.6	1.25	1.3	1.38	NA	NA	NA	NA	-0.62043264	NA	NA	61.76	64.02	-0.617712328	-0.592621524	1.317923351	0.08019039	-0.866717002	0.962172408	-1.481115659	-1.545199242	-1.435948911	0.812960257
CHL	2010	Chile	3	8	0.08	0.048	0.086	0.904	0.951	0.972	0.966	0.952	2.543	0.887	-1.266	1.86	1.738	0.935	0	NA	0	10	0	10	10	1.1	0.68	1.27	1.34	1.5	0	0	0	-0.292149193	-0.372504331	-0.271236208	-0.074589294	79.04	79.04	0.185940443	0.301574173	1.113224392	0.08019039	-0.508832494	0.962172408	-1.461322778	-1.507913055	-1.376360823	0.812960257
CHL	2011	Chile	3	8	0.08	0.048	0.086	0.904	0.966	0.972	0.964	0.959	2.543	0.887	-1.266	1.903	1.732	0.944	0	NA	1	10	0	10	10	1.07	0.45	1.25	1.37	1.53	0	0	0	-0.292149193	-0.124576021	-0.271236208	-0.074589294	104.01	93.67	1.3472373	1.172551738	1.113224392	0.08019039	-0.508832494	0.962172408	-1.461322778	-1.507913055	-1.376360823	0.812960257
CHL	2012	Chile	3	8	0.08	0.048	0.086	0.904	0.968	0.972	0.964	0.962	2.543	0.887	-1.266	1.971	1.823	0.944	0	NA	0	10	0	10	10	1.08	0.33	1.26	1.39	1.58	0	0	0	-0.292149193	0.123352288	-0.271236208	-0.074589294	105.01	95.27	1.393744984	1.267805608	1.113224392	0.08019039	-0.508832494	0.962172408	-1.461322778	-1.507913055	-1.376360823	0.812960257
CHL	2013	Chile	3	8	0.084	0.091	0.102	0.967	0.972	0.939	0.958	0.974	2.212	0.887	-1.276	1.839	1.684	0.937	0	NA	0	10	0	10	10	1.11	0.36	1.26	1.37	1.54	0	0	0	-0.292149193	0.371280598	-0.271236208	-0.074589294	104.08	94.83	1.350492838	1.241610794	0.876317554	0.08019039	-0.517757294	0.962172408	-1.448127524	-1.362157961	-1.323393633	1.048435144
CHL	2014	Chile	3	8	0.083	0.092	0.094	0.957	0.966	0.939	0.958	0.971	2.212	0.887	-1.276	1.861	1.687	0.924	0	NA	0	10	0	10	10	1.06	0.45	1.16	1.43	1.49	0	0	0	-0.292149193	0.619208907	-0.271236208	-0.074589294	96.24	88.9	0.985872599	0.888576141	0.876317554	0.08019039	-0.517757294	0.962172408	-1.451426338	-1.358768308	-1.349877228	1.011058178
CHL	2015	Chile	3	8	0.096	0.121	0.102	0.923	0.966	0.946	0.944	0.964	2.794	0.887	-1.25	1.778	1.621	0.914	0	NA	0	10	0	10	10	1	0.43	1.09	1.34	1.28	0	0	0	-0.292149193	0.867137216	-0.271236208	-0.074589294	50.75	51.86	-1.129761924	-1.316550929	1.292872779	0.08019039	-0.494552813	0.962172408	-1.408541762	-1.260468361	-1.323393633	0.883976493
CHL	2016	Chile	3	8	0.096	0.121	0.102	0.924	0.956	0.946	0.944	0.964	2.815	0.887	-1.25	1.769	1.615	0.933	0	NA	0	10	0	10	10	1	0.41	1.01	1.13	1.14	0	0	0	-0.292149193	1.115065526	-0.271236208	-0.074589294	42.81	45.53	-1.499032931	-1.693399049	1.307903122	0.08019039	-0.494552813	0.962172408	-1.408541762	-1.260468361	-1.323393633	0.88771419
CHL	2017	Chile	3	8	0.081	0.121	0.101	0.926	0.959	0.935	0.944	0.963	2.803	0.887	-1.252	1.758	1.6	0.928	0	NA	0	10	0	10	10	1	0.42	0.84	1.01	1.04	0	0	0	-0.292149193	1.362993835	-0.271236208	-0.074589294	52.81	54.28	-1.033956096	-1.172479452	1.299314355	0.08019039	-0.496337773	0.962172408	-1.458023965	-1.260468361	-1.326704082	0.895189583
CHL	2018	Chile	2	7	0.052	0.043	0.06	0.794	0.959	0.935	0.947	0.944	1.78	0.887	-1.528	1.637	1.609	0.904	0	NA	0	10	0	10	10	1.05	0.43	1.08	1.12	1.01	NA	NA	NA	NA	1.610922145	NA	NA	68.35	67.1	-0.311226694	-0.409257826	0.567121924	0.08019039	-0.742662272	0.962172408	-1.553689556	-1.524861322	-1.462432506	0.40181363
CHN	2005	China	0	0	0.549	0.449	0.638	0.427	0.214	0.221	0.334	0.354	-0.74	-0.383	-1.498	-0.813	-1.219	0.23	0	-1.504	0	0	7	-7	-7	-1.5	-0.5	-0.12	-0.59	-0.61	NA	NA	NA	NA	-1.612145878	NA	NA	53.39	60.88	-1.00698164	-0.779557242	-1.236519256	-1.200135453	-0.71588787	-1.757898894	0.085820757	-0.148662065	0.45100723	-0.969921026
CHN	2006	China	0	0	0.551	0.449	0.638	0.427	0.206	0.227	0.334	0.321	-0.74	-0.383	-1.391	-0.798	-1.218	0.23	0	-1.504	0	0	7	-7	-7	-1.75	-0.54	0.07	-0.64	-0.51	NA	NA	NA	NA	-1.364217568	NA	NA	64.29	71.49	-0.500047889	-0.147905022	-1.236519256	-1.200135453	-0.620392502	-1.757898894	0.092418384	-0.148662065	0.45100723	-0.969921026
CHN	2007	China	0	0	0.551	0.449	0.638	0.423	0.225	0.246	0.33	0.33	-0.74	-0.383	-1.391	-0.801	-1.23	0.23	0	-1.504	1	0	7	-7	-7	-1.72	-0.5	0.18	-0.54	-0.59	NA	NA	NA	NA	-1.116289259	NA	NA	71.12	74.52	-0.182400411	0.032481993	-1.236519256	-1.200135453	-0.620392502	-1.757898894	0.092418384	-0.148662065	0.45100723	-0.984871812
CHN	2008	China	0	0	0.547	0.427	0.645	0.403	0.225	0.206	0.334	0.309	-0.74	-0.383	-1.104	-0.791	-1.21	0.232	0	-1.536	0	0	7	-7	-7	-1.7	-0.49	0.15	-0.42	-0.52	NA	NA	NA	NA	-0.868360949	NA	NA	96.99	94.32	1.020753362	1.211248623	-1.236519256	-1.200135453	-0.364250723	-1.757898894	0.07922313	-0.223234438	0.474180375	-1.059625745
CHN	2009	China	0	0	0.547	0.441	0.636	0.377	0.21	0.208	0.346	0.336	-0.74	-0.383	-1.104	-0.791	-1.211	0.27	0	-1.536	0	0	7	-7	-7	-1.7	-0.45	0.09	-0.41	-0.51	NA	NA	NA	NA	-0.62043264	NA	NA	61.76	64.02	-0.617712328	-0.592621524	-1.236519256	-1.200135453	-0.364250723	-1.757898894	0.07922313	-0.175779291	0.444386331	-1.156805857
CHN	2010	China	0	0	0.552	0.465	0.653	0.391	0.193	0.238	0.366	0.314	-0.776	-0.383	-1.288	-0.773	-1.226	0.249	0	-0.647	0	0	7	-7	-7	-1.68	-0.66	0.09	-0.41	-0.56	13.69774133	0.029842574	0.005901655	1.544497041	-0.372504331	3.194439897	-0.057377032	79.04	79.04	0.185940443	0.301574173	-1.262285558	-1.200135453	-0.528467055	-1.757898894	0.095717198	-0.094427611	0.50066397	-1.104478104
CHN	2011	China	0	0	0.565	0.465	0.653	0.386	0.203	0.224	0.35	0.34	-0.776	-0.383	-1.288	-0.816	-1.212	0.249	0	-0.647	1	0	7	-7	-7	-1.64	-0.6	0.09	-0.46	-0.51	13.11832343	0.028150909	0.005243135	1.466806444	-0.124576021	2.997983546	-0.059297615	104.01	93.67	1.3472373	1.172551738	-1.262285558	-1.200135453	-0.528467055	-1.757898894	0.138601773	-0.094427611	0.50066397	-1.123166587
CHN	2012	China	0	0	0.557	0.465	0.64	0.367	0.197	0.228	0.36	0.283	-0.776	-0.485	-0.991	-0.795	-1.22	0.22	0	-0.647	0	0	7	-7	-7	-1.64	-0.54	0.02	-0.54	-0.44	18.57484958	0.039437048	0.00706268	2.198438614	0.123352288	4.308664845	-0.053990885	105.01	95.27	1.393744984	1.267805608	-1.262285558	-1.302964773	-0.263400475	-1.757898894	0.112211265	-0.094427611	0.457628129	-1.194182823
CHN	2013	China	0	0	0.552	0.464	0.622	0.33	0.173	0.194	0.317	0.253	-0.665	-0.485	-1.095	-0.915	-1.294	0.248	0	-1.114	0	0	7	-7	-7	-1.63	-0.54	0	-0.52	-0.36	16.23929575	0.034187991	0.005873163	1.885278506	0.371280598	3.699081663	-0.057460129	104.08	94.83	1.350492838	1.241610794	-1.182839459	-1.302964773	-0.356218402	-1.757898894	0.095717198	-0.097817265	0.39804004	-1.332477597
CHN	2014	China	0	0	0.539	0.454	0.627	0.326	0.17	0.194	0.334	0.237	-0.571	-0.903	-1.081	-0.895	-1.3	0.231	0	-1.04	1	0	7	-7	-7	-1.62	-0.52	0.32	-0.41	-0.34	12.38676159	0.025805753	0.42712971	1.368715798	0.619208907	2.725636097	1.171140638	96.24	88.9	0.985872599	0.888576141	-1.11556078	-1.724363358	-0.343723681	-1.757898894	0.052832622	-0.131713798	0.414592287	-1.347428384
CHN	2015	China	0	0	0.533	0.451	0.616	0.395	0.153	0.25	0.338	0.188	-0.939	-0.903	-1.46	-0.951	-1.281	0.18	0	-1.04	0	0	7	-7	-7	-1.66	-0.55	0.41	-0.41	-0.28	11.32705987	0.023306708	0.235980414	1.226626885	0.867137216	2.435417054	0.613650972	50.75	51.86	-1.129761924	-1.316550929	-1.378949651	-1.724363358	-0.681973627	-1.757898894	0.033039741	-0.141882758	0.378177344	-1.089527318
CHN	2016	China	0	0	0.538	0.451	0.617	0.393	0.145	0.186	0.351	0.206	-0.939	-0.903	-1.46	-0.959	-1.294	0.21	0	-1.04	0	0	7	-7	-7	-1.56	-0.5	0.35	-0.33	-0.25	28.71057428	0.058236459	0.562952437	3.557475857	1.115065526	6.491877	1.567269572	42.81	45.53	-1.499032931	-1.693399049	-1.378949651	-1.724363358	-0.681973627	-1.757898894	0.049533809	-0.141882758	0.381487793	-1.097002711
CHN	2017	China	0	0	0.508	0.427	0.537	0.378	0.156	0.188	0.348	0.168	-0.869	-0.903	-1.372	-0.903	-1.196	0.184	0	-0.864	0	0	7	-7	-7	-1.5	-0.23	0.42	-0.26	-0.27	29.67400056	0.059466935	0.345046518	3.686655785	1.362993835	6.634774571	0.931743831	52.81	54.28	-1.033956096	-1.172479452	-1.328848507	-1.724363358	-0.603435381	-1.757898894	-0.049430597	-0.223234438	0.116651843	-1.15306816
CHN	2018	China	0	0	0.542	0.416	0.546	0.279	0.132	0.144	0.352	0.167	-1.045	-0.903	-1.389	-0.961	-1.192	0.154	0	-1.106	0	0	7	-7	-7	-1.45	-0.26	0.48	-0.2	-0.27	NA	NA	NA	NA	1.610922145	NA	NA	68.35	67.1	-0.311226694	-0.409257826	-1.454817097	-1.724363358	-0.618607542	-1.757898894	0.062729063	-0.260520625	0.146445888	-1.523100124
CIV	2005	Cote dIvoire	1	3	0.794	0.828	0.774	0.415	0.785	0.771	0.404	0.73	1.057	2.109	1.547	0.459	0.438	0.772	0	-1.342	0	-77	-77	-77	0	-1.29	-2.26	-1.32	-1.48	-1.24	NA	NA	NA	NA	-1.612145878	NA	NA	53.39	60.88	-1.00698164	-0.779557242	0.04964868	1.312125966	2.001713942	-0.637869534	0.894030067	1.136016552	0.901228344	-1.014773385
CIV	2006	Cote dIvoire	1	3	0.795	0.824	0.775	0.447	0.803	0.797	0.444	0.719	1.057	2.092	1.547	0.47	0.444	0.789	0	-1.335	0	-77	-77	-77	0	-1.28	-1.87	-1.16	-1.45	-1.2	NA	NA	NA	NA	-1.364217568	NA	NA	64.29	71.49	-0.500047889	-0.147905022	0.04964868	1.294987746	2.001713942	-0.637869534	0.89732888	1.122457938	0.904538794	-0.895167094
CIV	2007	Cote dIvoire	1	4	0.797	0.825	0.775	0.454	0.805	0.771	0.411	0.738	1.406	2.092	1.27	0.482	0.432	0.805	0	-1.352	0	-88	-88	-88	0	-1.2	-1.84	-1.21	-1.46	-1.09	NA	NA	NA	NA	-1.116289259	NA	NA	71.12	74.52	-0.182400411	0.032481993	0.299438669	1.294987746	1.754496963	-0.637869534	0.903926507	1.125847592	0.904538794	-0.869003218
CIV	2008	Cote dIvoire	1	4	0.796	0.824	0.774	0.435	0.804	0.789	0.416	0.719	1.395	2.08	1.27	0.478	0.436	0.818	0	-1.352	0	-88	-88	-88	0	-1.17	-1.81	-1.24	-1.42	-1.11	NA	NA	NA	NA	-0.868360949	NA	NA	96.99	94.32	1.020753362	1.211248623	0.291565632	1.282890179	1.754496963	-0.637869534	0.900627694	1.122457938	0.901228344	-0.940019453
CIV	2009	Cote dIvoire	1	3	0.794	0.815	0.778	0.45	0.797	0.798	0.405	0.71	1.395	2.06	1.27	0.469	0.437	0.818	0	-1.377	0	-88	-88	-88	0	-1.06	-1.32	-1.11	-1.23	-1.1	NA	NA	NA	NA	-0.62043264	NA	NA	61.76	64.02	-0.617712328	-0.592621524	0.291565632	1.262727567	1.754496963	-0.637869534	0.894030067	1.091951058	0.914470142	-0.883954004
CIV	2010	Cote dIvoire	1	3	0.783	0.817	0.775	0.406	0.797	0.755	0.397	0.694	1.323	2.136	1.383	0.608	0.716	0.792	0	-1.442	0	-77	-77	-77	0	-1.05	-1.58	-1.29	-1.22	-1.16	0.691047586	0.000732042	0.000543704	-0.199490855	-0.372504331	-0.186222755	-0.073003573	79.04	79.04	0.185940443	0.301574173	0.240033027	1.339345492	1.85534721	-0.637869534	0.857743118	1.098730365	0.904538794	-1.048412655
CIV	2011	Cote dIvoire	1	4	0.666	0.585	0.585	0.43	0.763	0.75	0.541	0.687	1.109	1.434	1.054	0.621	0.7	0.763	0	-1.52	0	5	1	4	4	-1.08	-1.41	-1.16	-1.27	-1.01	0.748026688	0.000751786	0.000576292	-0.191850877	-0.124576021	-0.183929883	-0.07290853	104.01	93.67	1.3472373	1.172551738	0.086866673	0.631637821	1.561721268	0.002147242	0.471781938	0.31233079	0.275553413	-0.958707936
CIV	2012	Cote dIvoire	2	5	0.664	0.603	0.547	0.557	0.777	0.778	0.553	0.735	1.223	1.449	1.054	0.686	0.684	0.797	0	-1.397	0	5	1	4	4	-0.78	-1.26	-1.1	-1.08	-0.83	0.918068209	0.000902722	0.000682071	-0.169051051	0.123352288	-0.166401354	-0.072600022	105.01	95.27	1.393744984	1.267805608	0.168459964	0.64675978	1.561721268	0.002147242	0.465184311	0.37334455	0.149756337	-0.484020467
CIV	2013	Cote dIvoire	2	5	0.561	0.514	0.557	0.805	0.756	0.827	0.665	0.724	0.57	1.422	-0.008	0.701	0.724	0.744	0	-1.458	0	5	1	4	4	-0.75	-1.05	-0.93	-0.91	-0.74	0.949658491	0.000916659	0.000598399	-0.164815303	0.371280598	-0.164782842	-0.072844056	104.08	94.83	1.350492838	1.241610794	-0.298912135	0.619540254	0.613907434	0.002147242	0.125406519	0.071665402	0.182860831	0.442928293
CIV	2014	Cote dIvoire	1	4	0.561	0.507	0.557	0.817	0.767	0.77	0.644	0.746	0.577	1.419	-0.008	0.72	0.716	0.786	0	-1.428	0	5	1	4	4	-0.51	-1.04	-0.83	-0.59	-0.42	1.083039684	0.001030485	0.00064505	-0.146931036	0.619208907	-0.151563987	-0.072707995	96.24	88.9	0.985872599	0.888576141	-0.29390202	0.616515862	0.613907434	0.002147242	0.125406519	0.047937829	0.182860831	0.487780652
CIV	2015	Cote dIvoire	1	4	0.565	0.537	0.55	0.848	0.766	0.818	0.639	0.745	0.819	1.419	0.184	0.813	0.892	0.78	0	-1.48	0	5	1	4	4	-0.41	-0.83	-0.69	-0.63	-0.43	1.172740486	0.001099101	0.00071465	-0.134903605	0.867137216	-0.143595502	-0.072505007	50.75	51.86	-1.129761924	-1.316550929	-0.120695209	0.616515862	0.785263607	0.002147242	0.138601773	0.149627429	0.159687685	0.603649247
CIV	2016	Cote dIvoire	2	5	0.566	0.536	0.55	0.849	0.785	0.805	0.63	0.738	0.819	1.419	0.184	0.821	0.905	0.78	0	-1.48	0	5	1	4	4	-0.3	-0.91	-0.67	-0.64	-0.53	1.128139544	0.001040719	0.000672312	-0.140883872	1.115065526	-0.150375471	-0.072628486	42.81	45.53	-1.499032931	-1.693399049	-0.120695209	0.616515862	0.785263607	0.002147242	0.141900587	0.146237776	0.159687685	0.607386944
CIV	2017	Cote dIvoire	2	6	0.538	0.438	0.555	0.817	0.762	0.717	0.582	0.706	1.207	1.419	-0.149	0.827	0.93	0.805	0	-1.596	0	5	1	4	4	-0.27	-1.09	-0.76	-0.63	-0.53	1.17052371	0.001061218	0.000670787	-0.135200839	1.362993835	-0.147994871	-0.072632933	52.81	54.28	-1.033956096	-1.172479452	0.157008274	0.616515862	0.488067744	0.002147242	0.049533809	-0.185948252	0.176239932	0.487780652
CIV	2018	Cote dIvoire	2	6	0.433	0.379	0.279	0.836	0.785	0.756	0.687	0.726	1.313	1.419	0.641	0.882	0.936	0.772	0	-1.501	0	5	1	4	4	-0.22	-0.93	-0.57	-0.58	-0.5	NA	NA	NA	NA	1.610922145	NA	NA	68.35	67.1	-0.311226694	-0.409257826	0.232875721	0.616515862	1.193126999	0.002147242	-0.29684161	-0.385937799	-0.737444094	0.558796888
CMR	2005	Cameroon	1	3	0.925	0.901	0.888	0.537	0.686	0.868	0.093	0.707	-0.044	-0.626	0.763	0.155	0.097	0.596	0	-2.024	0	1	5	-4	-4	-1.03	-0.18	-0.91	-1.21	-1.18	NA	NA	NA	NA	-1.612145878	NA	NA	53.39	60.88	-1.00698164	-0.779557242	-0.73837074	-1.445111186	1.302009567	-1.277886311	1.326174636	1.383461246	1.278619572	-0.558774399
CMR	2006	Cameroon	1	3	0.925	0.901	0.888	0.537	0.705	0.855	0.102	0.68	-0.044	-0.626	0.763	0.16	0.101	0.596	0	-2.024	0	1	5	-4	-4	-1.02	-0.25	-0.95	-1.15	-1.09	NA	NA	NA	NA	-1.364217568	NA	NA	64.29	71.49	-0.500047889	-0.147905022	-0.73837074	-1.445111186	1.302009567	-1.277886311	1.326174636	1.383461246	1.278619572	-0.558774399
CMR	2007	Cameroon	1	3	0.925	0.901	0.888	0.538	0.693	0.876	0.099	0.673	-0.044	-0.626	0.763	0.167	0.122	0.596	0	-1.798	0	1	5	-4	-4	-1.05	-0.33	-0.84	-1.18	-1.02	NA	NA	NA	NA	-1.116289259	NA	NA	71.12	74.52	-0.182400411	0.032481993	-0.73837074	-1.445111186	1.302009567	-1.277886311	1.326174636	1.383461246	1.278619572	-0.555036702
CMR	2008	Cameroon	1	3	0.925	0.901	0.888	0.495	0.694	0.881	0.115	0.695	-0.044	-0.626	0.763	0.177	0.122	0.596	0	-1.798	1	1	5	-4	-4	-1.07	-0.55	-0.81	-1.1	-1.02	NA	NA	NA	NA	-0.868360949	NA	NA	96.99	94.32	1.020753362	1.211248623	-0.73837074	-1.445111186	1.302009567	-1.277886311	1.326174636	1.383461246	1.278619572	-0.715757656
CMR	2009	Cameroon	1	3	0.925	0.901	0.888	0.538	0.68	0.864	0.114	0.685	-0.044	-0.626	0.763	0.175	0.119	0.601	0	-1.798	0	1	5	-4	-4	-1.04	-0.47	-0.84	-1.12	-1	NA	NA	NA	NA	-0.62043264	NA	NA	61.76	64.02	-0.617712328	-0.592621524	-0.73837074	-1.445111186	1.302009567	-1.277886311	1.326174636	1.383461246	1.278619572	-0.555036702
CMR	2010	Cameroon	1	3	0.925	0.901	0.888	0.514	0.718	0.829	0.113	0.705	0.105	-0.626	0.862	0.218	0.139	0.702	0	-1.472	0	1	5	-4	-4	-1.06	-0.74	-0.89	-1.07	-1.06	0.581598605	0.000627399	0.000438281	-0.214166199	-0.372504331	-0.198375176	-0.073311041	79.04	79.04	0.185940443	0.301574173	-0.631726876	-1.445111186	1.390365094	-1.277886311	1.326174636	1.383461246	1.278619572	-0.644741421
CMR	2011	Cameroon	1	3	0.922	0.887	0.888	0.515	0.697	0.837	0.122	0.722	0.105	-0.626	0.862	0.267	0.226	0.727	0	-1.472	0	1	5	-4	-4	-1.03	-0.66	-0.89	-1.07	-1.15	0.758638253	0.000767076	0.000535006	-0.190428037	-0.124576021	-0.18215417	-0.073028941	104.01	93.67	1.3472373	1.172551738	-0.631726876	-1.445111186	1.390365094	-1.277886311	1.316278196	1.336006099	1.278619572	-0.641003724
CMR	2012	Cameroon	1	3	0.929	0.913	0.888	0.487	0.673	0.806	0.124	0.692	0.105	-0.626	0.724	0.239	0.215	0.698	0	-1.472	0	1	5	-4	-4	-1.02	-0.59	-0.9	-1.04	-1.26	0.798472787	0.000786673	0.00056509	-0.185086868	0.123352288	-0.179878378	-0.072941199	105.01	95.27	1.393744984	1.267805608	-0.631726876	-1.445111186	1.267202845	-1.277886311	1.33936989	1.424137086	1.278619572	-0.745659229
CMR	2013	Cameroon	1	3	0.944	0.921	0.921	0.501	0.66	0.785	0.091	0.636	-0.168	-0.626	0.786	0.182	0.277	0.64	0	-1.985	0	1	5	-4	-4	-1.04	-0.53	-0.92	-1.05	-1.21	0.831003865	0.000802902	0.000513282	-0.180724975	0.371280598	-0.177993604	-0.073092299	104.08	94.83	1.350492838	1.241610794	-0.827121337	-1.445111186	1.322536609	-1.277886311	1.388852093	1.451254313	1.387864402	-0.693331477
CMR	2014	Cameroon	1	3	0.944	0.921	0.921	0.501	0.662	0.809	0.091	0.636	-0.175	-0.626	0.786	0.184	0.277	0.644	0	-1.985	0	1	5	-4	-4	-0.94	-1.06	-0.79	-0.9	-1.16	0.864895249	0.000822144	0.000516973	-0.176180687	0.619208907	-0.175759053	-0.073081535	96.24	88.9	0.985872599	0.888576141	-0.832131452	-1.445111186	1.322536609	-1.277886311	1.388852093	1.451254313	1.387864402	-0.693331477
CMR	2015	Cameroon	1	3	0.944	0.921	0.921	0.492	0.656	0.809	0.089	0.636	-0.204	-0.626	0.786	0.182	0.28	0.621	0	-1.985	0	1	5	-4	-4	-0.95	-0.99	-0.78	-0.98	-1.07	0.885986098	0.000828799	0.000562174	-0.173352744	0.867137216	-0.174986172	-0.072949705	50.75	51.86	-1.129761924	-1.316550929	-0.85288764	-1.445111186	1.322536609	-1.277886311	1.388852093	1.451254313	1.387864402	-0.726970746
CMR	2016	Cameroon	1	3	0.953	0.934	0.944	0.467	0.532	0.664	0.064	0.518	-0.77	-0.626	1.404	0.13	0.343	0.457	0	-1.938	0	1	5	-4	-4	-1.03	-1.06	-0.76	-1.04	-1.15	0.850034372	0.000781282	0.000522776	-0.178173291	1.115065526	-0.180504458	-0.073064609	42.81	45.53	-1.499032931	-1.693399049	-1.257991175	-1.445111186	1.874089292	-1.277886311	1.418541415	1.495319806	1.464004737	-0.820413162
CMR	2017	Cameroon	1	3	0.913	0.894	0.945	0.415	0.517	0.587	0.067	0.472	-0.67	-0.626	1.963	0.061	0.295	0.537	0	-1.111	0	1	5	-4	-4	-1.05	-1.1	-0.81	-1.03	-1.2	0.855752962	0.000771644	0.000511814	-0.17740652	1.362993835	-0.181623714	-0.073096581	52.81	54.28	-1.033956096	-1.172479452	-1.186418112	-1.445111186	2.372985651	-1.277886311	1.286588874	1.359733672	1.467315187	-1.014773385
CMR	2018	Cameroon	1	3	0.929	0.912	0.946	0.402	0.521	0.58	0.071	0.475	-0.625	-0.626	1.832	-0.069	-0.015	0.534	0	-1.994	0	1	5	-4	-4	-1.1	-1.38	-0.8	-1.08	-1.15	NA	NA	NA	NA	1.610922145	NA	NA	68.35	67.1	-0.311226694	-0.409257826	-1.154210234	-1.445111186	2.256070762	-1.277886311	1.33936989	1.420747433	1.470625636	-1.063363441
COD	2005	Congo Dem. Rep.	0	0	0.929	0.902	0.905	0.172	0.508	0.331	0.104	0.469	-0.414	-0.991	0.748	-0.055	-0.75	0.524	0	NA	0	-88	-88	-88	4	-1.52	-2.13	-1.57	-1.55	-1.42	NA	NA	NA	NA	-1.612145878	NA	NA	53.39	60.88	-1.00698164	-0.779557242	-1.003191072	-1.813078849	1.288622366	0.002147242	1.33936989	1.386850899	1.334897212	-1.923033662
COD	2006	Congo Dem. Rep.	1	3	0.916	0.878	0.88	0.172	0.516	0.345	0.109	0.469	-0.414	-0.991	0.834	0.229	0.506	0.483	0	0.328	0	6	1	5	5	-1.23	-2.25	-1.62	-1.62	-1.53	NA	NA	NA	NA	-1.364217568	NA	NA	64.29	71.49	-0.500047889	-0.147905022	-1.003191072	-1.813078849	1.365375652	0.162151437	1.296485315	1.305499219	1.252135978	-1.923033662
COD	2007	Congo Dem. Rep.	1	3	0.916	0.878	0.88	0.172	0.533	0.311	0.115	0.469	-0.414	-0.991	0.746	0.224	0.507	0.474	0	0.708	0	6	1	5	5	-1.21	-2.18	-1.75	-1.61	-1.36	NA	NA	NA	NA	-1.116289259	NA	NA	71.12	74.52	-0.182400411	0.032481993	-1.003191072	-1.813078849	1.286837406	0.162151437	1.296485315	1.305499219	1.252135978	-1.923033662
COD	2008	Congo Dem. Rep.	1	3	0.916	0.878	0.88	0.172	0.515	0.278	0.115	0.505	-0.438	-0.991	0.757	0.225	0.501	0.484	0	0.708	0	6	1	5	5	-1.39	-2.01	-1.67	-1.56	-1.24	NA	NA	NA	NA	-0.868360949	NA	NA	96.99	94.32	1.020753362	1.211248623	-1.020368607	-1.813078849	1.296654687	0.162151437	1.296485315	1.305499219	1.252135978	-1.923033662
COD	2009	Congo Dem. Rep.	1	3	0.913	0.878	0.88	0.233	0.523	0.324	0.106	0.493	-0.438	-0.991	0.744	0.235	0.5	0.447	0	0.867	0	6	1	5	5	-1.41	-2	-1.69	-1.63	-1.39	NA	NA	NA	NA	-0.62043264	NA	NA	61.76	64.02	-0.617712328	-0.592621524	-1.020368607	-1.813078849	1.285052446	0.162151437	1.286588874	1.305499219	1.252135978	-1.695034169
COD	2010	Congo Dem. Rep.	1	3	0.929	0.905	0.892	0.245	0.523	0.349	0.111	0.478	-0.408	-0.991	0.659	0.205	0.423	0.419	0	0.682	0	6	1	5	5	-1.41	-2.2	-1.74	-1.62	-1.44	0.367157605	0.000149677	0.00031381	-0.242919279	-0.372504331	-0.25385393	-0.073674062	79.04	79.04	0.185940443	0.301574173	-0.998896688	-1.813078849	1.20919164	0.162151437	1.33936989	1.397019859	1.29186137	-1.650181809
COD	2011	Congo Dem. Rep.	1	3	0.929	0.905	0.892	0.245	0.523	0.321	0.111	0.478	-0.594	-0.991	0.754	0.106	0.219	0.458	0	0.682	0	6	1	5	5	-1.49	-2.21	-1.68	-1.62	-1.43	0.508991456	0.000203841	0.00038736	-0.223901647	-0.124576021	-0.247563734	-0.073459552	104.01	93.67	1.3472373	1.172551738	-1.132022584	-1.813078849	1.293977247	0.162151437	1.33936989	1.397019859	1.29186137	-1.650181809
COD	2012	Congo Dem. Rep.	1	3	0.923	0.887	0.892	0.245	0.491	0.302	0.114	0.493	-0.809	-0.991	0.544	0.103	0.24	0.462	0	0.682	0	6	1	5	5	-1.48	-2.09	-1.65	-1.66	-1.31	0.559375398	0.000220835	0.00039476	-0.217145973	0.123352288	-0.245590194	-0.073437969	105.01	95.27	1.393744984	1.267805608	-1.285904669	-1.813078849	1.106556432	0.162151437	1.319577009	1.336006099	1.29186137	-1.650181809
COD	2013	Congo Dem. Rep.	1	3	0.926	0.89	0.908	0.19	0.502	0.36	0.089	0.478	-0.668	-0.991	0.642	-0.013	0.201	0.452	0	0.786	0	6	1	5	5	-1.46	-2.19	-1.48	-1.57	-1.32	0.550889681	0.000213358	0.000338384	-0.21828377	0.371280598	-0.246458559	-0.073602391	104.08	94.83	1.350492838	1.241610794	-1.184986651	-1.813078849	1.194019479	0.162151437	1.32947345	1.346175059	1.34482856	-1.855755123
COD	2014	Congo Dem. Rep.	1	3	0.934	0.89	0.908	0.19	0.528	0.371	0.097	0.493	-0.392	-0.991	0.664	0.01	0.208	0.508	0	0.786	0	6	1	5	5	-1.29	-2.17	-1.56	-1.45	-1.3	0.598470306	0.00022825	0.000353497	-0.211903976	0.619208907	-0.244729144	-0.073558315	96.24	88.9	0.985872599	0.888576141	-0.987444998	-1.813078849	1.21365404	0.162151437	1.355863958	1.346175059	1.34482856	-1.855755123
COD	2015	Congo Dem. Rep.	1	3	0.943	0.93	0.908	0.19	0.504	0.371	0.1	0.524	-0.599	-0.991	0.722	-0.03	0.176	0.441	0	0.79	0	6	1	5	5	-1.3	-2.15	-1.63	-1.57	-1.29	0.550510855	0.000206648	0.000316567	-0.218334565	0.867137216	-0.247237748	-0.07366602	50.75	51.86	-1.129761924	-1.316550929	-1.135601237	-1.813078849	1.265417884	0.162151437	1.38555328	1.481761193	1.34482856	-1.855755123
COD	2016	Congo Dem. Rep.	1	3	0.943	0.93	0.908	0.165	0.445	0.35	0.1	0.469	-1.088	-0.991	0.878	-0.09	0.176	0.369	0	0.79	0	1	4	-3	-3	-1.39	-2.23	-1.51	-1.62	-1.34	0.595854879	0.000220605	0.000346427	-0.212254662	1.115065526	-0.245616887	-0.073578934	42.81	45.53	-1.499032931	-1.693399049	-1.485593514	-1.813078849	1.404644775	-1.117882117	1.38555328	1.481761193	1.34482856	-1.949197538
COD	2017	Congo Dem. Rep.	1	3	0.952	0.944	0.908	0.13	0.434	0.263	0.076	0.49	-1.083	-0.991	0.951	-0.089	0.187	0.374	0	0.819	0	1	4	-3	-3	-1.44	-2.35	-1.64	-1.69	-1.42	0.597667689	0.000218286	0.000343093	-0.212011594	1.362993835	-0.245886204	-0.073588658	52.81	54.28	-1.033956096	-1.172479452	-1.482014861	-1.813078849	1.46979582	-1.117882117	1.415242601	1.529216339	1.34482856	-2.08001692
COD	2018	Congo Dem. Rep.	1	3	0.952	0.939	0.921	0.131	0.445	0.287	0.091	0.46	-1.094	-0.991	0.945	-0.09	0.22	0.372	0	0.676	0	1	4	-3	-3	-1.51	-2.12	-1.55	-1.78	-1.5	NA	NA	NA	NA	1.610922145	NA	NA	68.35	67.1	-0.311226694	-0.409257826	-1.489887898	-1.813078849	1.46444094	-1.117882117	1.415242601	1.512268073	1.387864402	-2.076279223
COG	2005	Congo Rep.	1	3	0.895	0.875	0.819	0.224	0.454	0.483	0.118	0.402	-1.353	-0.402	0.988	-0.245	0.152	0.432	0	0.078	0	0	4	-4	-4	-1.08	-1.17	-1.27	-1.47	-1.04	NA	NA	NA	NA	-1.612145878	NA	NA	53.39	60.88	-1.00698164	-0.779557242	-1.67526213	-1.219289934	1.502817583	-1.277886311	1.227210231	1.295330259	1.050198566	-1.728673438
COG	2006	Congo Rep.	1	3	0.895	0.875	0.819	0.224	0.454	0.483	0.109	0.402	-1.353	-0.402	0.988	-0.243	0.153	0.432	0	0.078	0	0	4	-4	-4	-1.21	-0.92	-1.26	-1.27	-1.1	NA	NA	NA	NA	-1.364217568	NA	NA	64.29	71.49	-0.500047889	-0.147905022	-1.67526213	-1.219289934	1.502817583	-1.277886311	1.227210231	1.295330259	1.050198566	-1.728673438
COG	2007	Congo Rep.	1	3	0.895	0.875	0.819	0.224	0.454	0.483	0.109	0.402	-1.353	-0.402	0.988	-0.252	0.123	0.432	0	0.078	0	0	4	-4	-4	-1.23	-0.77	-1.32	-1.24	-1.15	NA	NA	NA	NA	-1.116289259	NA	NA	71.12	74.52	-0.182400411	0.032481993	-1.67526213	-1.219289934	1.502817583	-1.277886311	1.227210231	1.295330259	1.050198566	-1.728673438
COG	2008	Congo Rep.	1	3	0.895	0.875	0.819	0.224	0.454	0.483	0.109	0.402	-1.353	-0.402	0.988	-0.252	0.118	0.432	0	0.078	0	0	4	-4	-4	-1.16	-0.72	-1.22	-1.2	-1.18	NA	NA	NA	NA	-0.868360949	NA	NA	96.99	94.32	1.020753362	1.211248623	-1.67526213	-1.219289934	1.502817583	-1.277886311	1.227210231	1.295330259	1.050198566	-1.728673438
COG	2009	Congo Rep.	1	3	0.895	0.875	0.819	0.224	0.454	0.483	0.099	0.402	-1.353	-0.402	0.988	-0.219	0.202	0.432	0	0.078	0	0	4	-4	-4	-1.1	-0.25	-1.23	-1.22	-1.2	NA	NA	NA	NA	-0.62043264	NA	NA	61.76	64.02	-0.617712328	-0.592621524	-1.67526213	-1.219289934	1.502817583	-1.277886311	1.227210231	1.295330259	1.050198566	-1.728673438
COG	2010	Congo Rep.	1	3	0.904	0.875	0.819	0.224	0.454	0.475	0.117	0.402	-1.353	-0.402	0.988	-0.223	0.195	0.432	0	NA	0	0	4	-4	-4	-1.06	-0.32	-1.23	-1.22	-1.15	0.403799661	0.000216863	0.000859148	-0.23800617	-0.372504331	-0.246051439	-0.072083575	79.04	79.04	0.185940443	0.301574173	-1.67526213	-1.219289934	1.502817583	-1.277886311	1.256899553	1.295330259	1.050198566	-1.728673438
COG	2011	Congo Rep.	1	3	0.904	0.875	0.819	0.224	0.454	0.475	0.117	0.402	-1.353	-0.402	0.988	-0.222	0.198	0.432	0	NA	0	0	4	-4	-4	-1.11	-0.35	-1.2	-1.2	-1.12	0.591599125	0.000313015	0.000933122	-0.21282529	-0.124576021	-0.23488512	-0.071867831	104.01	93.67	1.3472373	1.172551738	-1.67526213	-1.219289934	1.502817583	-1.277886311	1.256899553	1.295330259	1.050198566	-1.728673438
COG	2012	Congo Rep.	1	3	0.904	0.875	0.819	0.224	0.454	0.475	0.1	0.402	-1.353	-0.402	0.988	-0.222	0.162	0.432	0	NA	0	0	4	-4	-4	-1.16	-0.49	-1.17	-1.14	-1.21	0.773800218	0.000403231	0.001329554	-0.188395062	0.123352288	-0.224408212	-0.070711631	105.01	95.27	1.393744984	1.267805608	-1.67526213	-1.219289934	1.502817583	-1.277886311	1.256899553	1.295330259	1.050198566	-1.728673438
COG	2013	Congo Rep.	1	3	0.806	0.79	0.638	0.151	0.306	0.531	0.164	0.279	-1.544	-0.402	0.988	-0.251	0.161	0.216	0	NA	0	0	4	-4	-4	-1.12	-0.48	-1.16	-1.11	-1.15	0.780124391	0.000400269	0.001285213	-0.187547092	0.371280598	-0.224752184	-0.070840951	104.08	94.83	1.350492838	1.241610794	-1.81196668	-1.219289934	1.502817583	-1.277886311	0.933615829	1.007209725	0.45100723	-2.001525291
COG	2014	Congo Rep.	1	3	0.806	0.79	0.638	0.153	0.306	0.531	0.164	0.279	-1.544	-0.402	0.988	-0.253	0.163	0.216	0	NA	0	0	4	-4	-4	-1.11	-0.36	-1.11	-1.11	-1.18	0.771868467	0.000388069	0.001257115	-0.188654079	0.619208907	-0.226169046	-0.0709229	96.24	88.9	0.985872599	0.888576141	-1.81196668	-1.219289934	1.502817583	-1.277886311	0.933615829	1.007209725	0.45100723	-1.994049897
COG	2015	Congo Rep.	1	3	0.806	0.79	0.638	0.152	0.306	0.538	0.164	0.279	-1.544	-0.402	0.988	-0.256	0.164	0.216	0	NA	0	0	4	-4	-4	-1.02	-0.53	-1.02	-1.08	-1.2	0.76610581	0.000375726	0.000282905	-0.189426758	0.867137216	-0.227602389	-0.073764198	50.75	51.86	-1.129761924	-1.316550929	-1.81196668	-1.219289934	1.502817583	-1.277886311	0.933615829	1.007209725	0.45100723	-1.997787594
COG	2016	Congo Rep.	1	3	0.806	0.79	0.638	0.132	0.306	0.507	0.164	0.279	-1.544	-0.402	0.988	-0.304	0.073	0.216	0	0.168	0	0	4	-4	-4	-1.16	-0.52	-1.1	-1.1	-1.19	0.737883112	0.000356293	0.000266288	-0.193210967	1.115065526	-0.229859192	-0.073812662	42.81	45.53	-1.499032931	-1.693399049	-1.81196668	-1.219289934	1.502817583	-1.277886311	0.933615829	1.007209725	0.45100723	-2.072541526
COG	2017	Congo Rep.	1	3	0.817	0.79	0.638	0.106	0.334	0.5	0.159	0.302	-1.614	-0.402	0.696	-0.298	0.1	0.223	0	0.392	0	0	4	-4	-4	-1.12	-0.53	-1.2	-1.1	-1.33	0.699160824	0.000332617	0.000257139	-0.198403001	1.362993835	-0.232608755	-0.073839344	52.81	54.28	-1.033956096	-1.172479452	-1.862067824	-1.219289934	1.242213403	-1.277886311	0.969902777	1.007209725	0.45100723	-2.169721638
COG	2018	Congo Rep.	1	3	0.818	0.79	0.638	0.098	0.302	0.441	0.22	0.305	-0.991	-0.402	0.257	-0.307	0.1	0.268	0	0.392	0	0	4	-4	-4	-1.18	-0.44	-1.22	-1.1	-1.36	NA	NA	NA	NA	1.610922145	NA	NA	68.35	67.1	-0.311226694	-0.409257826	-1.416167643	-1.219289934	0.850414652	-1.277886311	0.973201591	1.007209725	0.45100723	-2.199623211
COL	2005	Colombia	2	5	0.592	0.369	0.478	0.469	0.725	0.835	0.632	0.689	-0.459	0.018	1.133	0.839	0.919	0.542	0.34	NA	0	7	0	7	7	-0.32	-2.06	-0.18	-0.62	-0.13	NA	NA	NA	NA	-1.612145878	NA	NA	53.39	60.88	-1.00698164	-0.779557242	-1.03539895	-0.795875088	1.632227193	0.482159825	0.227669738	-0.419834332	-0.078664669	-0.812937768
COL	2006	Colombia	2	5	0.592	0.369	0.478	0.469	0.725	0.835	0.632	0.689	-0.459	0.018	1.133	0.86	0.946	0.542	0.28	NA	0	7	0	7	7	-0.17	-1.9	-0.17	-0.51	-0.12	NA	NA	NA	NA	-1.364217568	NA	NA	64.29	71.49	-0.500047889	-0.147905022	-1.03539895	-0.795875088	1.632227193	0.482159825	0.227669738	-0.419834332	-0.078664669	-0.812937768
COL	2007	Colombia	2	5	0.601	0.399	0.478	0.469	0.731	0.835	0.647	0.669	-0.459	0.018	0.878	0.87	0.944	0.542	0.22	NA	0	7	0	7	7	-0.17	-1.8	-0.05	-0.44	-0.22	NA	NA	NA	NA	-1.116289259	NA	NA	71.12	74.52	-0.182400411	0.032481993	-1.03539895	-0.795875088	1.404644775	0.482159825	0.25735906	-0.318144732	-0.078664669	-0.812937768
COL	2008	Colombia	2	5	0.601	0.399	0.478	0.469	0.749	0.835	0.647	0.664	-0.213	0.018	0.878	0.899	0.944	0.6	0.16	NA	0	7	0	7	7	-0.17	-1.85	-0.03	-0.4	-0.24	NA	NA	NA	NA	-0.868360949	NA	NA	96.99	94.32	1.020753362	1.211248623	-0.859329216	-0.795875088	1.404644775	0.482159825	0.25735906	-0.318144732	-0.078664669	-0.812937768
COL	2009	Colombia	2	5	0.602	0.399	0.485	0.469	0.749	0.835	0.64	0.664	-0.213	0.018	0.878	0.89	0.95	0.6	0.1	NA	0	7	0	7	7	-0.15	-1.83	-0.25	-0.39	-0.31	NA	NA	NA	NA	-0.62043264	NA	NA	61.76	64.02	-0.617712328	-0.592621524	-0.859329216	-0.795875088	1.404644775	0.482159825	0.260657873	-0.318144732	-0.055491524	-0.812937768
COL	2010	Colombia	2	5	0.582	0.332	0.474	0.5	0.769	0.853	0.693	0.735	-0.169	0.018	0.878	0.998	1.014	0.619	0.1	NA	0	7	0	7	7	-0.13	-1.54	-0.06	-0.31	-0.39	1.170097456	0.000608792	0.0010725	-0.135257993	-0.372504331	-0.200536056	-0.071461332	79.04	79.04	0.185940443	0.301574173	-0.827837068	-0.795875088	1.404644775	0.482159825	0.194681603	-0.545251506	-0.091906467	-0.697069173
COL	2011	Colombia	2	6	0.563	0.246	0.474	0.594	0.847	0.853	0.699	0.824	0.722	0.018	0.629	1.095	1.01	0.748	0.1	NA	0	7	0	7	7	-0.06	-1.28	0.04	-0.26	-0.29	0.940235498	0.000486413	0.000637016	-0.166078775	-0.124576021	-0.21474817	-0.072731427	104.01	93.67	1.3472373	1.172551738	-0.19012108	-0.795875088	1.182417238	0.482159825	0.132004146	-0.836761693	-0.091906467	-0.345725692
COL	2012	Colombia	2	6	0.555	0.246	0.474	0.594	0.855	0.853	0.704	0.847	1.197	0.018	0.629	1.116	1.014	0.753	0.1	NA	0	7	0	7	7	-0.06	-1.4	0.02	-0.35	-0.39	1.096393167	0.00056283	0.000722738	-0.145140549	0.123352288	-0.205873646	-0.072481419	105.01	95.27	1.393744984	1.267805608	0.149850968	-0.795875088	1.182417238	0.482159825	0.105613638	-0.836761693	-0.091906467	-0.345725692
COL	2013	Colombia	2	6	0.583	0.241	0.542	0.682	0.862	0.833	0.665	0.798	1.824	0.018	0.573	1.122	1.015	0.859	0.1	NA	1	7	0	7	7	-0.08	-1.29	0.07	-0.41	-0.41	1.046970955	0.000534442	0.000683401	-0.151767271	0.371280598	-0.209170474	-0.072596144	104.08	94.83	1.350492838	1.241610794	0.598614071	-0.795875088	1.132438354	0.482159825	0.197980416	-0.85370996	0.13320409	-0.01680839
COL	2014	Colombia	2	6	0.583	0.241	0.542	0.698	0.871	0.803	0.643	0.778	1.807	0.018	0.573	1.142	1.048	0.882	0.1	NA	0	7	0	7	7	-0.04	-1.11	-0.1	-0.29	-0.37	1.078669537	0.000545058	0.000705474	-0.147517002	0.619208907	-0.207937577	-0.072531769	96.24	88.9	0.985872599	0.888576141	0.58644665	-0.795875088	1.132438354	0.482159825	0.197980416	-0.85370996	0.13320409	0.042994756
COL	2015	Colombia	2	6	0.61	0.241	0.542	0.692	0.871	0.801	0.626	0.799	1.793	0.018	0.58	1.145	1.047	0.869	0.1	NA	0	7	0	7	7	0	-1.07	-0.04	-0.27	-0.3	1.0050146	0.000504525	0.000907872	-0.157392942	0.867137216	-0.212644692	-0.071941471	50.75	51.86	-1.129761924	-1.316550929	0.576426422	-0.795875088	1.138685715	0.482159825	0.287048381	-0.85370996	0.13320409	0.020568576
COL	2016	Colombia	2	6	0.572	0.278	0.493	0.749	0.872	0.801	0.649	0.796	2.12	0.018	0.222	1.155	1.057	0.89	0.1	NA	0	7	0	7	7	0.12	-0.88	0.02	-0.28	-0.32	0.907117456	0.000448624	0.000837597	-0.17051937	1.115065526	-0.219136646	-0.07214643	42.81	45.53	-1.499032931	-1.693399049	0.810470337	-0.795875088	0.81917785	0.482159825	0.161693468	-0.728292786	-0.029007929	0.233617283
COL	2017	Colombia	2	6	0.604	0.295	0.524	0.719	0.873	0.822	0.639	0.803	1.181	0.018	0.142	1.103	1.052	0.865	0.1	NA	0	7	0	7	7	0.11	-0.77	-0.07	-0.36	-0.37	0.911684473	0.000445376	0.000630051	-0.169907007	1.362993835	-0.219513838	-0.072751739	52.81	54.28	-1.033956096	-1.172479452	0.138399278	-0.795875088	0.747779444	0.482159825	0.2672555	-0.670668679	0.073616002	0.121486384
COL	2018	Colombia	2	6	0.609	0.295	0.49	0.629	0.793	0.723	0.562	0.7	0.719	0.018	0.275	1.042	1.289	0.731	0.1	NA	0	7	0	7	7	0.19	-0.81	-0.09	-0.41	-0.3	NA	NA	NA	NA	1.610922145	NA	NA	68.35	67.1	-0.311226694	-0.409257826	-0.192268271	-0.795875088	0.866479293	0.482159825	0.283749568	-0.670668679	-0.038939277	-0.214906311
COM	2005	Comoros	1	4	0.75	0.608	0.576	0.615	0.797	0.542	0.353	0.81	0.687	1.202	-0.895	0.544	0.704	0.679	0	NA	0	6	0	6	6	-0.63	-0.44	-1.6	-1	-0.88	NA	NA	NA	NA	-1.612145878	NA	NA	53.39	60.88	-1.00698164	-0.779557242	-0.215171652	0.397751525	-0.177722388	0.322155631	0.748882272	0.390292817	0.245759369	-0.267234063
COM	2006	Comoros	2	5	0.728	0.597	0.576	0.615	0.797	0.542	0.402	0.81	0.687	1.202	-0.895	0.682	0.998	0.679	0	NA	0	9	0	9	9	-0.22	-0.36	-1.68	-0.95	-0.7	NA	NA	NA	NA	-1.364217568	NA	NA	64.29	71.49	-0.500047889	-0.147905022	-0.215171652	0.397751525	-0.177722388	0.802168213	0.676308375	0.35300663	0.245759369	-0.267234063
COM	2007	Comoros	2	6	0.728	0.597	0.576	0.615	0.799	0.542	0.402	0.81	0.687	1.202	-0.895	0.686	0.994	0.679	0	NA	0	9	0	9	9	-0.39	-1.09	-1.76	-1.01	-0.71	NA	NA	NA	NA	-1.116289259	NA	NA	71.12	74.52	-0.182400411	0.032481993	-0.215171652	0.397751525	-0.177722388	0.802168213	0.676308375	0.35300663	0.245759369	-0.267234063
COM	2008	Comoros	2	6	0.728	0.597	0.576	0.615	0.799	0.542	0.367	0.81	0.687	1.202	-0.895	0.68	0.995	0.679	0	NA	0	9	0	9	9	-0.29	-1.11	-1.78	-1.03	-0.79	NA	NA	NA	NA	-0.868360949	NA	NA	96.99	94.32	1.020753362	1.211248623	-0.215171652	0.397751525	-0.177722388	0.802168213	0.676308375	0.35300663	0.245759369	-0.267234063
COM	2009	Comoros	2	6	0.728	0.597	0.576	0.615	0.792	0.544	0.368	0.837	0.687	1.202	-1.258	0.592	0.805	0.679	0	NA	0	9	0	9	9	-0.34	-0.77	-1.77	-1.13	-0.83	NA	NA	NA	NA	-0.62043264	NA	NA	61.76	64.02	-0.617712328	-0.592621524	-0.215171652	0.397751525	-0.501692653	0.802168213	0.676308375	0.35300663	0.245759369	-0.267234063
COM	2010	Comoros	2	5	0.728	0.597	0.576	0.611	0.746	0.575	0.383	0.754	0.687	1.172	-1.258	0.557	0.804	0.634	0	NA	0	9	0	9	9	-0.42	-0.56	-1.74	-1.05	-0.81	0	0	0	-0.292149193	-0.372504331	-0.271236208	-0.074589294	79.04	79.04	0.185940443	0.301574173	-0.215171652	0.367507607	-0.501692653	0.802168213	0.676308375	0.35300663	0.245759369	-0.28218485
COM	2011	Comoros	2	5	0.728	0.597	0.576	0.611	0.746	0.527	0.349	0.754	0.687	1.172	-1.258	0.595	0.85	0.634	0	NA	0	9	0	9	9	-0.37	-0.55	-1.76	-1	-0.79	0.000503546	1.97E-07	1.53E-06	-0.292081676	-0.124576021	-0.271213374	-0.07458483	104.01	93.67	1.3472373	1.172551738	-0.215171652	0.367507607	-0.501692653	0.802168213	0.676308375	0.35300663	0.245759369	-0.28218485
COM	2012	Comoros	2	5	0.727	0.6	0.578	0.611	0.746	0.527	0.375	0.754	0.687	1.172	-1.258	0.598	0.861	0.634	0	NA	0	9	0	9	9	-0.47	-0.45	-1.55	-1.02	-0.78	0.000561316	2.16E-07	1.75E-06	-0.29207393	0.123352288	-0.271211146	-0.074584194	105.01	95.27	1.393744984	1.267805608	-0.215171652	0.367507607	-0.501692653	0.802168213	0.673009562	0.36317559	0.252380268	-0.28218485
COM	2013	Comoros	2	6	0.691	0.541	0.599	0.807	0.785	0.642	0.347	0.766	0.873	1.172	-0.788	0.839	0.885	0.714	0	NA	0	9	0	9	9	-0.46	-0.26	-1.59	-0.94	-0.74	0.000436319	1.66E-07	1.10E-06	-0.29209069	0.371280598	-0.271216919	-0.07458608	104.08	94.83	1.350492838	1.241610794	-0.082045755	0.367507607	-0.082227021	0.802168213	0.554252275	0.163186043	0.321899704	0.450403686
COM	2014	Comoros	2	6	0.691	0.541	0.599	0.807	0.837	0.642	0.381	0.84	0.873	1.172	-0.788	0.845	0.888	0.714	0	NA	0	9	0	9	9	-0.29	-0.19	-1.67	-0.89	-0.61	0	0	0	-0.292149193	0.619208907	-0.271236208	-0.074589294	96.24	88.9	0.985872599	0.888576141	-0.082045755	0.367507607	-0.082227021	0.802168213	0.554252275	0.163186043	0.321899704	0.450403686
COM	2015	Comoros	1	4	0.724	0.541	0.599	0.812	0.831	0.63	0.355	0.841	0.873	1.172	-0.788	0.687	0.616	0.714	0	NA	0	9	0	9	9	-0.29	-0.23	-1.52	-0.82	-0.72	0	0	0	-0.292149193	0.867137216	-0.271236208	-0.074589294	50.75	51.86	-1.129761924	-1.316550929	-0.082045755	0.367507607	-0.082227021	0.802168213	0.663113121	0.163186043	0.321899704	0.469092169
COM	2016	Comoros	1	3	0.724	0.541	0.599	0.792	0.798	0.606	0.379	0.773	0.873	1.172	-0.788	0.676	0.608	0.714	0	NA	0	9	0	9	9	-0.25	0.04	-1.55	-1	-0.67	0	0	0	-0.292149193	1.115065526	-0.271236208	-0.074589294	42.81	45.53	-1.499032931	-1.693399049	-0.082045755	0.367507607	-0.082227021	0.802168213	0.663113121	0.163186043	0.321899704	0.394338237
COM	2017	Comoros	1	3	0.767	0.587	0.743	0.602	0.812	0.651	0.349	0.784	0.982	1.172	-0.735	0.367	0.543	0.696	0	NA	0	9	0	9	9	-0.3	0.04	-1.57	-1.05	-0.68	0.000508819	1.86E-07	1.35E-06	-0.292080969	1.362993835	-0.271214618	-0.074585347	52.81	54.28	-1.033956096	-1.172479452	-0.004031117	0.367507607	-0.034925577	0.802168213	0.804962102	0.319110096	0.798604414	-0.315824119
COM	2018	Comoros	1	3	0.796	0.659	0.8	0.481	0.791	0.589	0.273	0.747	0.877	0.066	-0.722	0.242	0.535	0.706	0	NA	0	0	3	-3	-3	-0.44	-0.2	-1.64	-1.08	-0.82	NA	NA	NA	NA	1.610922145	NA	NA	68.35	67.1	-0.311226694	-0.409257826	-0.079182832	-0.74748482	-0.023323336	-1.117882117	0.900627694	0.563165137	0.987300028	-0.768085409
CPV	2005	Cape Verde	3	8	0.15	0.165	0.175	0.95	0.946	0.935	0.924	0.923	2.771	0.734	-1.573	1.521	1.269	0.912	0.1	0.923	0	10	0	10	10	0.44	0.75	-0.21	0.4	0.56	NA	NA	NA	NA	-1.612145878	NA	NA	53.39	60.88	-1.00698164	-0.779557242	1.276410975	-0.074053589	-0.782823875	0.962172408	-1.230405833	-1.111323614	-1.081730829	0.984894302
CPV	2006	Cape Verde	3	8	0.15	0.165	0.175	0.95	0.946	0.935	0.922	0.923	2.771	0.734	-1.573	1.536	1.301	0.93	0.1	0.923	0	10	0	10	10	0.78	0.96	0.16	0.65	0.81	NA	NA	NA	NA	-1.364217568	NA	NA	64.29	71.49	-0.500047889	-0.147905022	1.276410975	-0.074053589	-0.782823875	0.962172408	-1.230405833	-1.111323614	-1.081730829	0.984894302
CPV	2007	Cape Verde	3	8	0.15	0.165	0.175	0.95	0.946	0.935	0.925	0.923	2.771	0.734	-1.573	1.529	1.305	0.931	0.1	0.923	0	10	0	10	10	0.86	0.88	0.35	0.63	0.89	NA	NA	NA	NA	-1.116289259	NA	NA	71.12	74.52	-0.182400411	0.032481993	1.276410975	-0.074053589	-0.782823875	0.962172408	-1.230405833	-1.111323614	-1.081730829	0.984894302
CPV	2008	Cape Verde	3	9	0.15	0.165	0.175	0.95	0.946	0.935	0.912	0.923	2.771	0.734	-1.573	1.543	1.308	0.931	0.1	0.923	0	10	0	10	10	0.94	0.81	0.07	0.58	0.87	NA	NA	NA	NA	-0.868360949	NA	NA	96.99	94.32	1.020753362	1.211248623	1.276410975	-0.074053589	-0.782823875	0.962172408	-1.230405833	-1.111323614	-1.081730829	0.984894302
CPV	2009	Cape Verde	3	9	0.149	0.164	0.175	0.95	0.946	0.935	0.923	0.923	2.771	0.734	-1.573	1.541	1.31	0.931	0.1	0.923	0	10	0	10	10	0.89	0.82	0.05	0.54	0.87	NA	NA	NA	NA	-0.62043264	NA	NA	61.76	64.02	-0.617712328	-0.592621524	1.276410975	-0.074053589	-0.782823875	0.962172408	-1.233704646	-1.114713267	-1.081730829	0.984894302
CPV	2010	Cape Verde	3	9	0.142	0.139	0.174	0.95	0.946	0.935	0.937	0.923	2.771	0.734	-1.573	1.524	1.324	0.931	0.1	0.778	0	10	0	10	10	0.89	0.84	-0.02	0.47	0.86	0.035138511	1.71E-05	4.83E-05	-0.287437686	-0.372504331	-0.26925143	-0.074448522	79.04	79.04	0.185940443	0.301574173	1.276410975	-0.074053589	-0.782823875	0.962172408	-1.256796341	-1.199454601	-1.085041278	0.984894302
CPV	2011	Cape Verde	3	9	0.123	0.139	0.174	0.95	0.946	0.935	0.937	0.923	2.771	0.734	-1.573	1.568	1.405	0.942	0.1	0.778	0	10	0	10	10	0.97	0.72	0.15	0.51	0.9	0.044073706	2.13E-05	5.20E-05	-0.28623962	-0.124576021	-0.268767146	-0.074437711	104.01	93.67	1.3472373	1.172551738	1.276410975	-0.074053589	-0.782823875	0.962172408	-1.319473797	-1.199454601	-1.085041278	0.984894302
CPV	2012	Cape Verde	3	9	0.141	0.139	0.174	0.95	0.948	0.935	0.933	0.923	2.756	0.734	-1.573	1.576	1.406	0.93	0.1	0.778	0	10	0	10	10	0.94	0.81	0.12	0.52	0.87	0.045512313	2.18E-05	5.92E-05	-0.286046726	0.123352288	-0.268707292	-0.074416683	105.01	95.27	1.393744984	1.267805608	1.265675015	-0.074053589	-0.782823875	0.962172408	-1.260095154	-1.199454601	-1.085041278	0.984894302
CPV	2013	Cape Verde	3	8	0.138	0.128	0.171	0.941	0.943	0.928	0.923	0.922	2.592	0.734	-1.72	1.551	1.412	0.919	0.1	0.82	0	10	0	10	10	0.92	0.78	0.1	0.54	0.84	0.052574569	2.50E-05	6.30E-05	-0.285099792	0.371280598	-0.268334313	-0.074405439	104.08	94.83	1.350492838	1.241610794	1.148295192	-0.074053589	-0.914018445	0.962172408	-1.269991595	-1.236740787	-1.094972626	0.951255032
CPV	2014	Cape Verde	3	8	0.15	0.163	0.171	0.943	0.943	0.928	0.908	0.922	2.592	0.734	-1.72	1.548	1.408	0.919	0.1	0.985	0	10	0	10	10	0.96	0.35	0.07	0.63	0.94	0.061075432	2.88E-05	7.25E-05	-0.283959963	0.619208907	-0.267892121	-0.074377741	96.24	88.9	0.985872599	0.888576141	1.148295192	-0.074053589	-0.914018445	0.962172408	-1.230405833	-1.118102921	-1.094972626	0.958730425
CPV	2015	Cape Verde	3	8	0.153	0.16	0.171	0.941	0.94	0.913	0.913	0.898	2.715	0.734	-1.657	1.552	1.406	0.926	0.1	0.985	0	10	0	10	10	0.94	0.87	0.17	0.59	0.95	0.060352612	2.82E-05	8.60E-05	-0.284056881	0.867137216	-0.267956439	-0.074338554	50.75	51.86	-1.129761924	-1.316550929	1.23633006	-0.074053589	-0.857792201	0.962172408	-1.220509392	-1.128271881	-1.094972626	0.951255032
CPV	2016	Cape Verde	3	8	0.153	0.16	0.175	0.94	0.941	0.913	0.908	0.891	2.745	0.734	-1.657	1.546	1.415	0.924	0.1	0.985	0	10	0	10	10	0.98	0.89	0.13	0.35	0.87	0.062240184	2.89E-05	8.56E-05	-0.283803788	1.115065526	-0.267877438	-0.074339604	42.81	45.53	-1.499032931	-1.693399049	1.257801978	-0.074053589	-0.857792201	0.962172408	-1.220509392	-1.128271881	-1.081730829	0.947517335
CPV	2017	Cape Verde	3	8	0.149	0.161	0.172	0.956	0.923	0.908	0.908	0.888	2.714	0.734	-1.628	1.501	1.4	0.9	0.1	0.958	0	10	0	10	10	0.97	0.77	0.17	0.42	0.83	0.063490815	2.93E-05	8.16E-05	-0.283636099	1.362993835	-0.267833664	-0.074351283	52.81	54.28	-1.033956096	-1.172479452	1.235614329	-0.074053589	-0.831910279	0.962172408	-1.233704646	-1.124882227	-1.091662177	1.007320481
CPV	2018	Cape Verde	2	7	0.16	0.157	0.215	0.955	0.911	0.925	0.901	0.859	2.671	0.734	-1.667	1.514	1.391	0.907	0.1	1.388	0	10	0	10	10	1	0.75	0.32	0.45	0.77	NA	NA	NA	NA	1.610922145	NA	NA	68.35	67.1	-0.311226694	-0.409257826	1.204837912	-0.074053589	-0.866717002	0.962172408	-1.197417698	-1.138440841	-0.949312854	1.003582785
CRI	2005	Costa Rica	3	9	0.167	0.126	0.165	0.965	0.976	0.931	0.956	0.976	2.638	0.848	-1.807	1.911	1.558	0.967	0.1	NA	0	10	0	10	10	0.82	0.71	0.16	0.56	0.48	NA	NA	NA	NA	-1.612145878	NA	NA	53.39	60.88	-1.00698164	-0.779557242	1.181218801	0.040873298	-0.991664211	0.962172408	-1.174326003	-1.243520094	-1.114835322	1.040959751
CRI	2006	Costa Rica	3	9	0.179	0.177	0.165	0.965	0.98	0.931	0.949	0.98	2.638	0.848	-1.807	1.957	1.637	0.967	0.1	NA	0	10	0	10	10	0.92	0.74	0.05	0.47	0.44	NA	NA	NA	NA	-1.364217568	NA	NA	64.29	71.49	-0.500047889	-0.147905022	1.181218801	0.040873298	-0.991664211	0.962172408	-1.134740241	-1.070647774	-1.114835322	1.040959751
CRI	2007	Costa Rica	3	9	0.179	0.177	0.165	0.965	0.98	0.933	0.949	0.98	2.638	0.848	-1.807	1.974	1.635	0.967	0.1	NA	0	10	0	10	10	0.94	0.58	0.2	0.38	0.52	NA	NA	NA	NA	-1.116289259	NA	NA	71.12	74.52	-0.182400411	0.032481993	1.181218801	0.040873298	-0.991664211	0.962172408	-1.134740241	-1.070647774	-1.114835322	1.040959751
CRI	2008	Costa Rica	3	9	0.179	0.177	0.165	0.965	0.98	0.94	0.949	0.98	2.638	0.848	-1.807	1.949	1.64	0.967	0.1	NA	0	10	0	10	10	0.97	0.36	0.28	0.46	0.55	NA	NA	NA	NA	-0.868360949	NA	NA	96.99	94.32	1.020753362	1.211248623	1.181218801	0.040873298	-0.991664211	0.962172408	-1.134740241	-1.070647774	-1.114835322	1.040959751
CRI	2009	Costa Rica	3	9	0.179	0.177	0.165	0.965	0.98	0.938	0.954	0.98	2.638	0.848	-1.807	1.956	1.637	0.967	0.1	NA	0	10	0	10	10	1.01	0.59	0.33	0.56	0.75	NA	NA	NA	NA	-0.62043264	NA	NA	61.76	64.02	-0.617712328	-0.592621524	1.181218801	0.040873298	-0.991664211	0.962172408	-1.134740241	-1.070647774	-1.114835322	1.040959751
CRI	2010	Costa Rica	3	9	0.176	0.126	0.205	0.965	0.981	0.927	0.949	0.982	2.638	0.848	-1.807	1.968	1.656	0.97	0.1	NA	0	10	0	10	10	1.04	0.69	0.31	0.52	0.71	0	0	0	-0.292149193	-0.372504331	-0.271236208	-0.074589294	79.04	79.04	0.185940443	0.301574173	1.181218801	0.040873298	-0.991664211	0.962172408	-1.144636681	-1.243520094	-0.982417347	1.040959751
CRI	2011	Costa Rica	3	9	0.177	0.126	0.205	0.965	0.983	0.944	0.952	0.982	2.638	0.848	-1.807	1.962	1.655	0.97	0.1	NA	0	10	0	10	10	1.05	0.51	0.34	0.45	0.65	0	0	0	-0.292149193	-0.124576021	-0.271236208	-0.074589294	104.01	93.67	1.3472373	1.172551738	1.181218801	0.040873298	-0.991664211	0.962172408	-1.141337868	-1.243520094	-0.982417347	1.040959751
CRI	2012	Costa Rica	3	9	0.178	0.126	0.205	0.976	0.98	0.946	0.957	0.98	2.638	0.848	-1.807	1.966	1.654	0.97	0.1	NA	0	10	0	10	10	1.09	0.64	0.5	0.52	0.62	0	0	0	-0.292149193	0.123352288	-0.271236208	-0.074589294	105.01	95.27	1.393744984	1.267805608	1.181218801	0.040873298	-0.991664211	0.962172408	-1.138039054	-1.243520094	-0.982417347	1.082074413
CRI	2013	Costa Rica	3	9	0.185	0.146	0.195	0.971	0.977	0.933	0.946	0.978	2.366	0.848	-1.612	1.949	1.678	0.972	0.1	NA	0	10	0	10	10	1.08	0.68	0.48	0.55	0.63	0	0	0	-0.292149193	0.371280598	-0.271236208	-0.074589294	104.08	94.83	1.350492838	1.241610794	0.986540071	0.040873298	-0.817630598	0.962172408	-1.11494736	-1.175727027	-1.015521841	1.06338593
CRI	2014	Costa Rica	3	9	0.169	0.121	0.157	0.971	0.978	0.937	0.946	0.973	2.366	0.848	-1.612	1.943	1.664	0.972	0.1	NA	0	10	0	10	10	1.14	0.58	0.4	0.56	0.76	0	0	0	-0.292149193	0.619208907	-0.271236208	-0.074589294	96.24	88.9	0.985872599	0.888576141	0.986540071	0.040873298	-0.817630598	0.962172408	-1.167728376	-1.260468361	-1.141318917	1.06338593
CRI	2015	Costa Rica	3	9	0.179	0.134	0.163	0.971	0.975	0.938	0.962	0.973	2.342	0.848	-1.465	1.944	1.656	0.975	0.1	NA	0	10	0	10	10	1.15	0.68	0.38	0.5	0.75	0	0	0	-0.292149193	0.867137216	-0.271236208	-0.074589294	50.75	51.86	-1.129761924	-1.316550929	0.969362536	0.040873298	-0.686436028	0.962172408	-1.134740241	-1.216402867	-1.121456221	1.06338593
CRI	2016	Costa Rica	3	8	0.186	0.167	0.169	0.975	0.967	0.919	0.953	0.975	1.506	0.848	-1.584	1.9	1.641	0.948	0.1	NA	0	10	0	10	10	1.12	0.66	0.36	0.47	0.74	0	0	0	-0.292149193	1.115065526	-0.271236208	-0.074589294	42.81	45.53	-1.499032931	-1.693399049	0.371011732	0.040873298	-0.792641156	0.962172408	-1.111648546	-1.104544307	-1.101593525	1.078336717
CRI	2017	Costa Rica	3	9	0.181	0.2	0.173	0.964	0.961	0.942	0.945	0.956	2.221	0.848	-1.593	1.865	1.642	0.948	0.1	NA	0	10	0	10	10	1.12	0.61	0.25	0.45	0.47	0	0	0	-0.292149193	1.362993835	-0.271236208	-0.074589294	52.81	54.28	-1.033956096	-1.172479452	0.88275913	0.040873298	-0.800673477	0.962172408	-1.128142614	-0.992685747	-1.088351727	1.037222054
CRI	2018	Costa Rica	3	9	0.18	0.168	0.176	0.819	0.954	0.898	0.943	0.951	2.228	0.848	-1.519	1.837	1.634	0.931	0.1	NA	0	10	0	10	10	1.14	0.49	0.38	0.48	0.55	NA	NA	NA	NA	1.610922145	NA	NA	68.35	67.1	-0.311226694	-0.409257826	0.887769244	0.040873298	-0.734629951	0.962172408	-1.131441427	-1.101154654	-1.078420379	0.495256046
CUB	2005	Cuba	0	0	0.46	0.431	0.805	0.81	0.059	0.179	0.227	0.077	-1.23	0.236	-0.557	-1.032	-0.199	0.062	0	NA	0	0	7	-7	-7	-1.81	0.42	-0.54	-1.08	0.28	NA	NA	NA	NA	-1.612145878	NA	NA	53.39	60.88	-1.00698164	-0.779557242	-1.587227263	-0.576102621	0.123935876	-1.757898894	-0.207773645	-0.209675825	1.003852275	0.461616776
CUB	2006	Cuba	0	0	0.46	0.431	0.805	0.81	0.068	0.194	0.213	0.066	-1.23	0.236	-0.557	-1.038	-0.198	0.062	0	NA	0	0	7	-7	-7	-1.89	0.47	-0.24	-0.76	0.26	NA	NA	NA	NA	-1.364217568	NA	NA	64.29	71.49	-0.500047889	-0.147905022	-1.587227263	-0.576102621	0.123935876	-1.757898894	-0.207773645	-0.209675825	1.003852275	0.461616776
CUB	2007	Cuba	0	0	0.46	0.431	0.805	0.809	0.06	0.171	0.214	0.073	-1.23	0.236	-0.557	-1.012	-0.197	0.062	0	NA	0	0	7	-7	-7	-1.85	0.45	-0.2	-0.68	0.31	NA	NA	NA	NA	-1.116289259	NA	NA	71.12	74.52	-0.182400411	0.032481993	-1.587227263	-0.576102621	0.123935876	-1.757898894	-0.207773645	-0.209675825	1.003852275	0.457879079
CUB	2008	Cuba	0	0	0.46	0.431	0.805	0.783	0.06	0.176	0.215	0.073	-1.23	0.236	-0.557	-1.031	-0.223	0.062	0	NA	0	0	7	-7	-7	-1.8	0.52	-0.38	-0.82	0.27	NA	NA	NA	NA	-0.868360949	NA	NA	96.99	94.32	1.020753362	1.211248623	-1.587227263	-0.576102621	0.123935876	-1.757898894	-0.207773645	-0.209675825	1.003852275	0.360698968
CUB	2009	Cuba	0	0	0.46	0.431	0.805	0.812	0.06	0.199	0.22	0.073	-1.23	0.236	-0.557	-1.046	-0.223	0.062	0	NA	0	0	7	-7	-7	-1.7	0.36	-0.36	-0.71	0.28	NA	NA	NA	NA	-0.62043264	NA	NA	61.76	64.02	-0.617712328	-0.592621524	-1.587227263	-0.576102621	0.123935876	-1.757898894	-0.207773645	-0.209675825	1.003852275	0.469092169
CUB	2010	Cuba	0	0	0.46	0.431	0.805	0.84	0.06	0.22	0.217	0.073	-1.23	0.236	-0.557	-1.044	-0.225	0.062	0	NA	0	0	7	-7	-7	-1.62	0.35	-0.36	-0.72	0.31	NA	NA	NA	NA	-0.372504331	NA	NA	79.04	79.04	0.185940443	0.301574173	-1.587227263	-0.576102621	0.123935876	-1.757898894	-0.207773645	-0.209675825	1.003852275	0.573747674
CUB	2011	Cuba	0	0	0.46	0.431	0.805	0.84	0.074	0.235	0.219	0.086	-1.23	0.236	-0.445	-1.01	-0.225	0.086	0	NA	0	0	7	-7	-7	-1.61	0.28	-0.38	-0.69	0.27	NA	NA	NA	NA	-0.124576021	NA	NA	104.01	93.67	1.3472373	1.172551738	-1.587227263	-0.576102621	0.223893643	-1.757898894	-0.207773645	-0.209675825	1.003852275	0.573747674
CUB	2012	Cuba	0	0	0.46	0.431	0.805	0.707	0.074	0.279	0.207	0.086	-1.23	0.236	-0.445	-1.022	-0.222	0.086	0	NA	0	0	7	-7	-7	-1.51	0.31	-0.4	-0.71	0.24	NA	NA	NA	NA	0.123352288	NA	NA	105.01	95.27	1.393744984	1.267805608	-1.587227263	-0.576102621	0.223893643	-1.757898894	-0.207773645	-0.209675825	1.003852275	0.076634025
CUB	2013	Cuba	0	0	0.437	0.441	0.823	0.848	0.057	0.432	0.241	0.081	-1.209	0.236	-0.642	-1.051	-0.29	0.06	0	NA	0	0	7	-7	-7	-1.48	0.37	-0.44	-0.7	0.12	NA	NA	NA	NA	0.371280598	NA	NA	104.08	94.83	1.350492838	1.241610794	-1.57219692	-0.576102621	0.04807507	-1.757898894	-0.283646356	-0.175779291	1.063440363	0.603649247
CUB	2014	Cuba	0	0	0.438	0.441	0.823	0.852	0.059	0.389	0.23	0.082	-1.487	0.236	-0.642	-1.07	-0.291	0.055	0	NA	0	0	7	-7	-7	-1.54	0.54	-0.05	-0.66	0.07	NA	NA	NA	NA	0.619208907	NA	NA	96.24	88.9	0.985872599	0.888576141	-1.771170034	-0.576102621	0.04807507	-1.757898894	-0.280347542	-0.175779291	1.063440363	0.618600034
CUB	2015	Cuba	0	0	0.448	0.441	0.862	0.849	0.057	0.438	0.219	0.077	-1.487	0.236	-0.654	-1.066	-0.291	0.055	0	NA	0	0	7	-7	-7	-1.56	0.64	0.02	-0.7	0.07	NA	NA	NA	NA	0.867137216	NA	NA	50.75	51.86	-1.129761924	-1.316550929	-1.771170034	-0.576102621	0.037365309	-1.757898894	-0.247359407	-0.175779291	1.192547889	0.607386944
CUB	2016	Cuba	0	0	0.417	0.352	0.833	0.821	0.078	0.435	0.271	0.113	-1.451	0.236	-0.851	-1.008	-0.252	0.072	0	NA	0	0	7	-7	-7	-1.56	0.69	-0.1	-0.44	0.17	NA	NA	NA	NA	1.115065526	NA	NA	42.81	45.53	-1.499032931	-1.693399049	-1.745403731	-0.576102621	-0.138453265	-1.757898894	-0.349622626	-0.477458439	1.096544857	0.502731439
CUB	2017	Cuba	0	0	0.471	0.48	0.838	0.883	0.064	0.432	0.253	0.087	-1.451	0.236	-0.65	-1.024	-0.275	0.072	0	NA	0	0	7	-7	-7	-1.55	0.65	-0.18	-0.43	0.27	NA	NA	NA	NA	1.362993835	NA	NA	52.81	54.28	-1.033956096	-1.172479452	-1.745403731	-0.576102621	0.040935229	-1.757898894	-0.171486696	-0.043582811	1.113097104	0.734468629
CUB	2018	Cuba	0	0	0.468	0.475	0.839	0.836	0.085	0.45	0.236	0.155	-1.653	0.236	-0.616	-0.868	-0.222	0.092	0	NA	0	1	6	-5	-5	-1.44	0.65	-0.24	-0.44	0.17	NA	NA	NA	NA	1.610922145	NA	NA	68.35	67.1	-0.311226694	-0.409257826	-1.889981318	-0.576102621	0.071279551	-1.437890505	-0.181383137	-0.060531078	1.116407553	0.558796888
CUW	2005	Curacao	NA	NA	NA	NA	NA	NA	NA	NA	NA	NA	NA	NA	NA	NA	NA	NA	NA	NA	0	NA	NA	NA	NA	NA	NA	NA	NA	NA	NA	NA	NA	NA	-1.612145878	NA	NA	53.39	60.88	-1.00698164	-0.779557242	NA	NA	NA	NA	NA	NA	NA	NA
CUW	2006	Curacao	NA	NA	NA	NA	NA	NA	NA	NA	NA	NA	NA	NA	NA	NA	NA	NA	NA	NA	0	NA	NA	NA	NA	NA	NA	NA	NA	NA	NA	NA	NA	NA	-1.364217568	NA	NA	64.29	71.49	-0.500047889	-0.147905022	NA	NA	NA	NA	NA	NA	NA	NA
CUW	2007	Curacao	NA	NA	NA	NA	NA	NA	NA	NA	NA	NA	NA	NA	NA	NA	NA	NA	NA	NA	0	NA	NA	NA	NA	NA	NA	NA	NA	NA	NA	NA	NA	NA	-1.116289259	NA	NA	71.12	74.52	-0.182400411	0.032481993	NA	NA	NA	NA	NA	NA	NA	NA
CUW	2008	Curacao	NA	NA	NA	NA	NA	NA	NA	NA	NA	NA	NA	NA	NA	NA	NA	NA	NA	NA	0	NA	NA	NA	NA	NA	NA	NA	NA	NA	NA	NA	NA	NA	-0.868360949	NA	NA	96.99	94.32	1.020753362	1.211248623	NA	NA	NA	NA	NA	NA	NA	NA
CUW	2009	Curacao	NA	NA	NA	NA	NA	NA	NA	NA	NA	NA	NA	NA	NA	NA	NA	NA	NA	NA	0	NA	NA	NA	NA	NA	NA	NA	NA	NA	NA	NA	NA	NA	-0.62043264	NA	NA	61.76	64.02	-0.617712328	-0.592621524	NA	NA	NA	NA	NA	NA	NA	NA
CUW	2010	Curacao	NA	NA	NA	NA	NA	NA	NA	NA	NA	NA	NA	NA	NA	NA	NA	NA	NA	NA	0	NA	NA	NA	NA	NA	NA	NA	NA	NA	NA	NA	NA	NA	-0.372504331	NA	NA	79.04	79.04	0.185940443	0.301574173	NA	NA	NA	NA	NA	NA	NA	NA
CUW	2011	Curacao	NA	NA	NA	NA	NA	NA	NA	NA	NA	NA	NA	NA	NA	NA	NA	NA	NA	NA	0	NA	NA	NA	NA	NA	NA	NA	NA	NA	NA	NA	NA	NA	-0.124576021	NA	NA	104.01	93.67	1.3472373	1.172551738	NA	NA	NA	NA	NA	NA	NA	NA
CUW	2012	Curacao	NA	NA	NA	NA	NA	NA	NA	NA	NA	NA	NA	NA	NA	NA	NA	NA	NA	NA	0	NA	NA	NA	NA	NA	NA	NA	NA	NA	NA	NA	NA	NA	0.123352288	NA	NA	105.01	95.27	1.393744984	1.267805608	NA	NA	NA	NA	NA	NA	NA	NA
CUW	2013	Curacao	NA	NA	NA	NA	NA	NA	NA	NA	NA	NA	NA	NA	NA	NA	NA	NA	NA	NA	0	NA	NA	NA	NA	NA	NA	NA	NA	NA	NA	NA	NA	NA	0.371280598	NA	NA	104.08	94.83	1.350492838	1.241610794	NA	NA	NA	NA	NA	NA	NA	NA
CUW	2014	Curacao	NA	NA	NA	NA	NA	NA	NA	NA	NA	NA	NA	NA	NA	NA	NA	NA	NA	NA	0	NA	NA	NA	NA	NA	NA	NA	NA	NA	NA	NA	NA	NA	0.619208907	NA	NA	96.24	88.9	0.985872599	0.888576141	NA	NA	NA	NA	NA	NA	NA	NA
CUW	2015	Curacao	NA	NA	NA	NA	NA	NA	NA	NA	NA	NA	NA	NA	NA	NA	NA	NA	NA	NA	0	NA	NA	NA	NA	NA	NA	NA	NA	NA	NA	NA	NA	NA	0.867137216	NA	NA	50.75	51.86	-1.129761924	-1.316550929	NA	NA	NA	NA	NA	NA	NA	NA
CUW	2016	Curacao	NA	NA	NA	NA	NA	NA	NA	NA	NA	NA	NA	NA	NA	NA	NA	NA	NA	NA	0	NA	NA	NA	NA	NA	NA	NA	NA	NA	NA	NA	NA	NA	1.115065526	NA	NA	42.81	45.53	-1.499032931	-1.693399049	NA	NA	NA	NA	NA	NA	NA	NA
CUW	2017	Curacao	NA	NA	NA	NA	NA	NA	NA	NA	NA	NA	NA	NA	NA	NA	NA	NA	NA	NA	0	NA	NA	NA	NA	NA	NA	NA	NA	NA	NA	NA	NA	NA	1.362993835	NA	NA	52.81	54.28	-1.033956096	-1.172479452	NA	NA	NA	NA	NA	NA	NA	NA
CUW	2018	Curacao	NA	NA	NA	NA	NA	NA	NA	NA	NA	NA	NA	NA	NA	NA	NA	NA	NA	NA	0	NA	NA	NA	NA	NA	NA	NA	NA	NA	NA	NA	NA	NA	1.610922145	NA	NA	68.35	67.1	-0.311226694	-0.409257826	NA	NA	NA	NA	NA	NA	NA	NA
CYM	2005	Cayman Islands	NA	NA	NA	NA	NA	NA	NA	NA	NA	NA	NA	NA	NA	NA	NA	NA	NA	NA	0	NA	NA	NA	NA	0.9	1.19	1.29	0.86	1.28	NA	NA	NA	NA	-1.612145878	NA	NA	53.39	60.88	-1.00698164	-0.779557242	NA	NA	NA	NA	NA	NA	NA	NA
CYM	2006	Cayman Islands	NA	NA	NA	NA	NA	NA	NA	NA	NA	NA	NA	NA	NA	NA	NA	NA	NA	NA	0	NA	NA	NA	NA	0.78	1.11	1.29	1.08	1.26	NA	NA	NA	NA	-1.364217568	NA	NA	64.29	71.49	-0.500047889	-0.147905022	NA	NA	NA	NA	NA	NA	NA	NA
CYM	2007	Cayman Islands	NA	NA	NA	NA	NA	NA	NA	NA	NA	NA	NA	NA	NA	NA	NA	NA	NA	NA	0	NA	NA	NA	NA	0.74	1.09	1.25	1.11	1.27	NA	NA	NA	NA	-1.116289259	NA	NA	71.12	74.52	-0.182400411	0.032481993	NA	NA	NA	NA	NA	NA	NA	NA
CYM	2008	Cayman Islands	NA	NA	NA	NA	NA	NA	NA	NA	NA	NA	NA	NA	NA	NA	NA	NA	NA	NA	0	NA	NA	NA	NA	0.75	1.12	1.28	1.13	0.81	NA	NA	NA	NA	-0.868360949	NA	NA	96.99	94.32	1.020753362	1.211248623	NA	NA	NA	NA	NA	NA	NA	NA
CYM	2009	Cayman Islands	NA	NA	NA	NA	NA	NA	NA	NA	NA	NA	NA	NA	NA	NA	NA	NA	NA	NA	0	NA	NA	NA	NA	0.56	1.09	1.27	0.9	1.12	NA	NA	NA	NA	-0.62043264	NA	NA	61.76	64.02	-0.617712328	-0.592621524	NA	NA	NA	NA	NA	NA	NA	NA
CYM	2010	Cayman Islands	NA	NA	NA	NA	NA	NA	NA	NA	NA	NA	NA	NA	NA	NA	NA	NA	NA	NA	0	NA	NA	NA	NA	0.58	1.15	1.25	0.9	1.13	NA	NA	NA	NA	-0.372504331	NA	NA	79.04	79.04	0.185940443	0.301574173	NA	NA	NA	NA	NA	NA	NA	NA
CYM	2011	Cayman Islands	NA	NA	NA	NA	NA	NA	NA	NA	NA	NA	NA	NA	NA	NA	NA	NA	NA	NA	0	NA	NA	NA	NA	0.58	1.34	1.24	0.88	1.35	NA	NA	NA	NA	-0.124576021	NA	NA	104.01	93.67	1.3472373	1.172551738	NA	NA	NA	NA	NA	NA	NA	NA
CYM	2012	Cayman Islands	NA	NA	NA	NA	NA	NA	NA	NA	NA	NA	NA	NA	NA	NA	NA	NA	NA	NA	0	NA	NA	NA	NA	0.57	0.96	1.25	0.9	1.35	NA	NA	NA	NA	0.123352288	NA	NA	105.01	95.27	1.393744984	1.267805608	NA	NA	NA	NA	NA	NA	NA	NA
CYM	2013	Cayman Islands	NA	NA	NA	NA	NA	NA	NA	NA	NA	NA	NA	NA	NA	NA	NA	NA	NA	NA	0	NA	NA	NA	NA	0.55	1.02	1.23	0.9	1.36	NA	NA	NA	NA	0.371280598	NA	NA	104.08	94.83	1.350492838	1.241610794	NA	NA	NA	NA	NA	NA	NA	NA
CYM	2014	Cayman Islands	NA	NA	NA	NA	NA	NA	NA	NA	NA	NA	NA	NA	NA	NA	NA	NA	NA	NA	0	NA	NA	NA	NA	0.47	1.05	1.18	0.59	1.02	NA	NA	NA	NA	0.619208907	NA	NA	96.24	88.9	0.985872599	0.888576141	NA	NA	NA	NA	NA	NA	NA	NA
CYM	2015	Cayman Islands	NA	NA	NA	NA	NA	NA	NA	NA	NA	NA	NA	NA	NA	NA	NA	NA	NA	NA	0	NA	NA	NA	NA	0.47	1.15	1.17	0.82	1.02	NA	NA	NA	NA	0.867137216	NA	NA	50.75	51.86	-1.129761924	-1.316550929	NA	NA	NA	NA	NA	NA	NA	NA
CYM	2016	Cayman Islands	NA	NA	NA	NA	NA	NA	NA	NA	NA	NA	NA	NA	NA	NA	NA	NA	NA	NA	0	NA	NA	NA	NA	0.47	1.17	1.18	0.8	0.53	NA	NA	NA	NA	1.115065526	NA	NA	42.81	45.53	-1.499032931	-1.693399049	NA	NA	NA	NA	NA	NA	NA	NA
CYM	2017	Cayman Islands	NA	NA	NA	NA	NA	NA	NA	NA	NA	NA	NA	NA	NA	NA	NA	NA	NA	NA	0	NA	NA	NA	NA	0.48	1.19	1.23	0.78	0.53	NA	NA	NA	NA	1.362993835	NA	NA	52.81	54.28	-1.033956096	-1.172479452	NA	NA	NA	NA	NA	NA	NA	NA
CYM	2018	Cayman Islands	NA	NA	NA	NA	NA	NA	NA	NA	NA	NA	NA	NA	NA	NA	NA	NA	NA	NA	0	NA	NA	NA	NA	0.49	1.15	1.2	0.77	0.5	NA	NA	NA	NA	1.610922145	NA	NA	68.35	67.1	-0.311226694	-0.409257826	NA	NA	NA	NA	NA	NA	NA	NA
CYP	2005	Cyprus	3	9	0.15	0.167	0.179	0.901	0.929	0.805	0.933	0.91	2.848	0.635	-1.138	1.449	1.336	0.93	0	NA	0	10	0	10	10	0.96	0.52	1.16	0.89	0.91	NA	NA	NA	NA	-1.612145878	NA	NA	53.39	60.88	-1.00698164	-0.779557242	1.331522233	-0.173858517	-0.394595045	0.962172408	-1.230405833	-1.104544307	-1.068489031	0.801747168
CYP	2006	Cyprus	3	9	0.15	0.167	0.179	0.901	0.929	0.805	0.921	0.91	2.848	0.635	-1.138	1.493	1.401	0.93	0	NA	0	10	0	10	10	1.05	0.54	1.27	1.11	1.09	NA	NA	NA	NA	-1.364217568	NA	NA	64.29	71.49	-0.500047889	-0.147905022	1.331522233	-0.173858517	-0.394595045	0.962172408	-1.230405833	-1.104544307	-1.068489031	0.801747168
CYP	2007	Cyprus	3	9	0.149	0.167	0.179	0.901	0.942	0.836	0.928	0.916	2.848	0.635	-1.138	1.487	1.408	0.93	0	NA	0	10	0	10	10	1.07	0.54	1.43	1.12	1.08	NA	NA	NA	NA	-1.116289259	NA	NA	71.12	74.52	-0.182400411	0.032481993	1.331522233	-0.173858517	-0.394595045	0.962172408	-1.233704646	-1.104544307	-1.068489031	0.801747168
CYP	2008	Cyprus	3	9	0.151	0.167	0.179	0.916	0.942	0.836	0.926	0.916	2.848	0.635	-1.138	1.473	1.398	0.93	0	NA	0	10	0	10	10	1.08	0.64	1.53	1.22	1.2	NA	NA	NA	NA	-0.868360949	NA	NA	96.99	94.32	1.020753362	1.211248623	1.331522233	-0.173858517	-0.394595045	0.962172408	-1.227107019	-1.104544307	-1.068489031	0.857812617
CYP	2009	Cyprus	3	9	0.152	0.167	0.179	0.935	0.928	0.836	0.934	0.915	2.848	0.635	-1.138	1.478	1.4	0.93	0	NA	0	10	0	10	10	1.07	0.39	1.42	1.21	0.91	NA	NA	NA	NA	-0.62043264	NA	NA	61.76	64.02	-0.617712328	-0.592621524	1.331522233	-0.173858517	-0.394595045	0.962172408	-1.223808206	-1.104544307	-1.068489031	0.928828852
CYP	2010	Cyprus	3	9	0.154	0.167	0.178	0.935	0.95	0.898	0.939	0.943	2.848	0.635	-1.138	1.49	1.397	0.936	0	NA	0	10	0	10	10	1.02	0.45	1.53	1.22	0.97	0	0	0	-0.292149193	-0.372504331	-0.271236208	-0.074589294	79.04	79.04	0.185940443	0.301574173	1.331522233	-0.173858517	-0.394595045	0.962172408	-1.217210579	-1.104544307	-1.07179948	0.928828852
CYP	2011	Cyprus	3	9	0.155	0.167	0.178	0.934	0.95	0.898	0.938	0.943	2.848	0.635	-1.138	1.504	1.402	0.941	0	NA	0	10	0	10	10	1.05	0.61	1.56	1.07	0.87	0	0	0	-0.292149193	-0.124576021	-0.271236208	-0.074589294	104.01	93.67	1.3472373	1.172551738	1.331522233	-0.173858517	-0.394595045	0.962172408	-1.213911765	-1.104544307	-1.07179948	0.925091156
CYP	2012	Cyprus	3	9	0.154	0.17	0.178	0.943	0.938	0.873	0.944	0.93	2.848	0.635	-1.138	1.509	1.403	0.943	0	NA	0	10	0	10	10	1.02	0.64	1.39	1.1	1.25	0	0	0	-0.292149193	0.123352288	-0.271236208	-0.074589294	105.01	95.27	1.393744984	1.267805608	1.331522233	-0.173858517	-0.394595045	0.962172408	-1.217210579	-1.094375347	-1.07179948	0.958730425
CYP	2013	Cyprus	3	8	0.179	0.174	0.18	0.968	0.936	0.847	0.914	0.931	2.313	0.635	-1.062	1.462	1.385	0.938	0	NA	0	10	0	10	10	0.98	0.56	1.37	1.04	1.25	0	0	0	-0.292149193	0.371280598	-0.271236208	-0.074589294	104.08	94.83	1.350492838	1.241610794	0.948606348	-0.173858517	-0.32676656	0.962172408	-1.134740241	-1.080816734	-1.065178582	1.052172841
CYP	2014	Cyprus	3	9	0.176	0.174	0.18	0.968	0.928	0.847	0.908	0.931	2.328	0.635	-1.062	1.446	1.383	0.925	0	NA	0	10	0	10	10	1.02	0.55	1.14	1.08	1.08	0	0	0	-0.292149193	0.619208907	-0.271236208	-0.074589294	96.24	88.9	0.985872599	0.888576141	0.959342307	-0.173858517	-0.32676656	0.962172408	-1.144636681	-1.080816734	-1.065178582	1.052172841
CYP	2015	Cyprus	3	9	0.176	0.174	0.18	0.969	0.949	0.884	0.918	0.937	2.488	0.635	-1.062	1.465	1.38	0.935	0	NA	0	10	0	10	10	1.03	0.55	1.05	1.04	1.01	0	0	0	-0.292149193	0.867137216	-0.271236208	-0.074589294	50.75	51.86	-1.129761924	-1.316550929	1.073859207	-0.173858517	-0.32676656	0.962172408	-1.144636681	-1.080816734	-1.065178582	1.055910537
CYP	2016	Cyprus	3	9	0.168	0.174	0.18	0.968	0.934	0.857	0.908	0.939	2.49	0.635	-1.062	1.474	1.383	0.932	0	NA	0	10	0	10	10	1.05	0.6	0.96	0.72	0.83	0	0	0	-0.292149193	1.115065526	-0.271236208	-0.074589294	42.81	45.53	-1.499032931	-1.693399049	1.075290668	-0.173858517	-0.32676656	0.962172408	-1.17102719	-1.080816734	-1.065178582	1.052172841
CYP	2017	Cyprus	3	9	0.171	0.17	0.208	0.968	0.934	0.847	0.909	0.924	2.708	0.635	-1.08	1.519	1.386	0.95	0	NA	0	10	0	10	10	1.06	0.54	0.92	0.88	0.78	0	0	0	-0.292149193	1.362993835	-0.271236208	-0.074589294	52.81	54.28	-1.033956096	-1.172479452	1.231319945	-0.173858517	-0.342831201	0.962172408	-1.161130749	-1.094375347	-0.972485999	1.052172841
CYP	2018	Cyprus	3	9	0.206	0.246	0.253	0.969	0.935	0.876	0.899	0.925	2.352	0.635	-1.08	1.461	1.312	0.931	0	NA	0	10	0	10	10	1.04	0.54	0.92	0.75	0.64	NA	NA	NA	NA	1.610922145	NA	NA	68.35	67.1	-0.311226694	-0.409257826	0.976519842	-0.173858517	-0.342831201	0.962172408	-1.045672276	-0.836761693	-0.823515778	1.055910537
CZE	2005	Czech Republic	3	9	0.314	0.334	0.314	0.963	0.973	0.954	0.862	0.977	3.199	1.548	-1.533	1.705	1.492	0.899	0	2.171	0	10	0	10	10	0.91	0.94	0.93	0.87	0.49	NA	NA	NA	NA	-1.612145878	NA	NA	53.39	60.88	-1.00698164	-0.779557242	1.582743683	0.746564708	-0.747124672	0.962172408	-0.689400417	-0.538472199	-0.621578366	1.033484358
CZE	2006	Czech Republic	3	9	0.316	0.333	0.312	0.976	0.975	0.945	0.854	0.974	3.199	1.544	-1.533	1.725	1.546	0.899	0	2.171	0	9	0	9	9	0.96	1.05	1.1	0.87	0.36	NA	NA	NA	NA	-1.364217568	NA	NA	64.29	71.49	-0.500047889	-0.147905022	1.582743683	0.742532185	-0.747124672	0.802168213	-0.68280279	-0.541861852	-0.628199265	1.082074413
CZE	2007	Czech Republic	3	9	0.311	0.334	0.309	0.977	0.969	0.948	0.862	0.972	3.199	1.552	-1.533	1.721	1.542	0.899	0	2.171	0	9	0	9	9	1	1.02	0.9	0.91	0.3	NA	NA	NA	NA	-1.116289259	NA	NA	71.12	74.52	-0.182400411	0.032481993	1.582743683	0.75059723	-0.747124672	0.802168213	-0.699296858	-0.538472199	-0.638130613	1.08581211
CZE	2008	Czech Republic	3	9	0.318	0.334	0.313	0.977	0.972	0.948	0.874	0.972	3.199	1.552	-1.533	1.723	1.548	0.899	0	2.171	0	9	0	9	9	1.03	1.05	1.01	0.91	0.36	NA	NA	NA	NA	-0.868360949	NA	NA	96.99	94.32	1.020753362	1.211248623	1.582743683	0.75059723	-0.747124672	0.802168213	-0.676205163	-0.538472199	-0.624888815	1.08581211
CZE	2009	Czech Republic	3	9	0.322	0.328	0.311	0.977	0.97	0.947	0.863	0.976	3.199	1.552	-1.533	1.719	1.536	0.899	0	2.642	0	9	0	9	9	1.03	0.91	0.88	0.96	0.39	NA	NA	NA	NA	-0.62043264	NA	NA	61.76	64.02	-0.617712328	-0.592621524	1.582743683	0.75059723	-0.747124672	0.802168213	-0.663009909	-0.558810119	-0.631509714	1.08581211
CZE	2010	Czech Republic	3	9	0.273	0.334	0.273	0.977	0.969	0.947	0.878	0.975	3.199	1.55	-1.533	1.699	1.488	0.899	0	2.211	0	9	0	9	9	1.01	0.99	0.91	0.95	0.33	0	0	0	-0.292149193	-0.372504331	-0.271236208	-0.074589294	79.04	79.04	0.185940443	0.301574173	1.582743683	0.748580969	-0.747124672	0.802168213	-0.824651771	-0.538472199	-0.75730679	1.08581211
CZE	2011	Czech Republic	3	9	0.287	0.327	0.273	0.976	0.971	0.944	0.864	0.976	3.199	1.576	-1.533	1.683	1.486	0.899	0	2.211	0	9	0	9	9	1.02	1.11	0.93	1.04	0.34	0	0	0	-0.292149193	-0.124576021	-0.271236208	-0.074589294	104.01	93.67	1.3472373	1.172551738	1.582743683	0.774792364	-0.747124672	0.802168213	-0.778468382	-0.562199772	-0.75730679	1.082074413
CZE	2012	Czech Republic	3	9	0.294	0.327	0.263	0.98	0.967	0.944	0.877	0.981	3.199	1.572	-1.533	1.7	1.484	0.899	0	2.211	0	9	0	9	9	0.97	1.05	0.93	1.04	0.27	0	0	0	-0.292149193	0.123352288	-0.271236208	-0.074589294	105.01	95.27	1.393744984	1.267805608	1.582743683	0.770759842	-0.747124672	0.802168213	-0.755376687	-0.562199772	-0.790411284	1.0970252
CZE	2013	Czech Republic	3	8	0.291	0.331	0.251	0.976	0.953	0.94	0.888	0.951	3.199	1.572	-1.297	1.629	1.521	0.904	0	2.293	0	9	0	9	9	0.98	1.08	0.89	1.04	0.23	0	0	0	-0.292149193	0.371280598	-0.271236208	-0.074589294	104.08	94.83	1.350492838	1.241610794	1.582743683	0.770759842	-0.536499376	0.802168213	-0.765273128	-0.548641159	-0.830136676	1.082074413
CZE	2014	Czech Republic	3	9	0.266	0.302	0.235	0.976	0.95	0.937	0.893	0.936	3.199	1.56	-1.297	1.602	1.524	0.904	0	1.892	0	9	0	9	9	1.03	0.99	1.02	1.15	0.37	0	0	0	-0.292149193	0.619208907	-0.271236208	-0.074589294	96.24	88.9	0.985872599	0.888576141	1.582743683	0.758662275	-0.536499376	0.802168213	-0.847743466	-0.646941106	-0.883103866	1.082074413
CZE	2015	Czech Republic	3	9	0.263	0.278	0.238	0.972	0.95	0.925	0.896	0.93	3.199	1.539	-1.147	1.606	1.523	0.904	0	1.892	0	9	0	9	9	1.04	0.98	1.05	1.15	0.43	0	0	0	-0.292149193	0.867137216	-0.271236208	-0.074589294	50.75	51.86	-1.129761924	-1.316550929	1.582743683	0.737491532	-0.402627366	0.802168213	-0.857639906	-0.728292786	-0.873172518	1.067123627
CZE	2016	Czech Republic	3	8	0.263	0.278	0.238	0.957	0.95	0.918	0.895	0.93	3.199	1.57	-0.909	1.596	1.52	0.904	0	1.892	0	9	0	9	9	1.02	0.98	1.04	1.04	0.54	0	0	0	-0.292149193	1.115065526	-0.271236208	-0.074589294	42.81	45.53	-1.499032931	-1.693399049	1.582743683	0.76874358	-0.190217109	0.802168213	-0.857639906	-0.728292786	-0.873172518	1.011058178
CZE	2017	Czech Republic	3	9	0.276	0.38	0.262	0.955	0.941	0.909	0.854	0.935	2.868	1.552	-0.873	1.464	1.365	0.917	0	1.287	0	9	0	9	9	0.97	1	1.01	1.12	0.57	0	0	0	-0.292149193	1.362993835	-0.271236208	-0.074589294	52.81	54.28	-1.033956096	-1.172479452	1.345836845	0.75059723	-0.158087826	0.802168213	-0.814755331	-0.382548145	-0.793721733	1.003582785
CZE	2018	Czech Republic	3	8	0.253	0.438	0.261	0.952	0.93	0.907	0.85	0.931	2.308	1.248	-0.863	1.417	1.302	0.884	0	1.958	0	9	0	9	9	0.93	1.04	0.92	1.05	0.5	NA	NA	NA	NA	1.610922145	NA	NA	68.35	67.1	-0.311226694	-0.409257826	0.945027694	0.444125532	-0.149163026	0.802168213	-0.890628041	-0.185948252	-0.797032183	0.992369695
DEU	2005	Germany	3	9	0.014	0.012	0.009	0.986	0.965	0.952	0.996	0.978	2.893	2.057	-1.806	2.11	1.819	0.899	0	2.659	0	10	0	10	10	1.49	0.89	1.51	1.66	1.89	NA	NA	NA	NA	-1.612145878	NA	NA	53.39	60.88	-1.00698164	-0.779557242	1.363730111	1.259703176	-0.990771731	0.962172408	-1.67904447	-1.629940575	-1.631265424	1.11945138
DEU	2006	Germany	3	9	0.014	0.012	0.009	0.986	0.965	0.952	0.996	0.978	2.893	2.057	-1.806	2.108	1.827	0.899	0	2.659	0	10	0	10	10	1.37	1.03	1.65	1.78	1.8	NA	NA	NA	NA	-1.364217568	NA	NA	64.29	71.49	-0.500047889	-0.147905022	1.363730111	1.259703176	-0.990771731	0.962172408	-1.67904447	-1.629940575	-1.631265424	1.11945138
DEU	2007	Germany	3	9	0.014	0.012	0.009	0.986	0.965	0.952	0.996	0.978	2.893	2.057	-1.806	2.109	1.817	0.899	0	2.659	0	10	0	10	10	1.34	1	1.64	1.77	1.74	NA	NA	NA	NA	-1.116289259	NA	NA	71.12	74.52	-0.182400411	0.032481993	1.363730111	1.259703176	-0.990771731	0.962172408	-1.67904447	-1.629940575	-1.631265424	1.11945138
DEU	2008	Germany	3	9	0.014	0.012	0.009	0.986	0.965	0.952	0.996	0.98	2.893	2.057	-1.806	2.114	1.824	0.899	0	2.659	0	10	0	10	10	1.34	0.95	1.52	1.75	1.76	NA	NA	NA	NA	-0.868360949	NA	NA	96.99	94.32	1.020753362	1.211248623	1.363730111	1.259703176	-0.990771731	0.962172408	-1.67904447	-1.629940575	-1.631265424	1.11945138
DEU	2009	Germany	3	9	0.014	0.012	0.009	0.986	0.967	0.954	0.996	0.984	2.893	2.057	-1.806	2.145	1.893	0.899	0	2.659	0	10	0	10	10	1.33	0.86	1.58	1.66	1.76	NA	NA	NA	NA	-0.62043264	NA	NA	61.76	64.02	-0.617712328	-0.592621524	1.363730111	1.259703176	-0.990771731	0.962172408	-1.67904447	-1.629940575	-1.631265424	1.11945138
DEU	2010	Germany	3	9	0.012	0.012	0.009	0.987	0.966	0.952	0.996	0.982	2.893	2.057	-1.529	2.143	1.886	0.895	0	2.21	0	10	0	10	10	1.3	0.8	1.57	1.63	1.78	1.061672715	0.000387048	0.000715895	-0.149796002	-0.372504331	-0.226287569	-0.072501375	79.04	79.04	0.185940443	0.301574173	1.363730111	1.259703176	-0.743554752	0.962172408	-1.685642097	-1.629940575	-1.631265424	1.123189076
DEU	2011	Germany	3	9	0.012	0.012	0.009	0.987	0.964	0.952	0.996	0.982	2.893	2.057	-1.474	2.143	1.887	0.895	0	2.21	0	10	0	10	10	1.35	0.84	1.55	1.62	1.74	1.199695998	0.000441389	0.000787719	-0.131289305	-0.124576021	-0.219976815	-0.0722919	104.01	93.67	1.3472373	1.172551738	1.363730111	1.259703176	-0.694468348	0.962172408	-1.685642097	-1.629940575	-1.631265424	1.123189076
DEU	2012	Germany	3	9	0.012	0.012	0.008	0.987	0.956	0.952	0.996	0.98	2.893	2.057	-1.474	2.131	1.886	0.895	0	2.21	0	10	0	10	10	1.39	0.78	1.59	1.66	1.83	1.011353725	0.000371821	0.000675136	-0.156542967	0.123352288	-0.228055886	-0.07262025	105.01	95.27	1.393744984	1.267805608	1.363730111	1.259703176	-0.694468348	0.962172408	-1.685642097	-1.629940575	-1.634575873	1.123189076
DEU	2013	Germany	3	9	0.02	0.022	0.014	0.955	0.961	0.952	0.993	0.98	2.893	2.057	-1.185	1.848	1.47	0.895	0	2.389	0	10	0	10	10	1.41	0.93	1.54	1.65	1.81	0.944780899	0.000346836	0.00062075	-0.16546931	0.371280598	-0.230957484	-0.072778868	104.08	94.83	1.350492838	1.241610794	1.363730111	1.259703176	-0.436541608	0.962172408	-1.659251589	-1.596044042	-1.614713177	1.003582785
DEU	2014	Germany	3	9	0.02	0.022	0.014	0.955	0.964	0.952	0.993	0.98	2.893	2.057	-1.18	1.86	1.471	0.884	0	2.389	0	10	0	10	10	1.44	0.93	1.73	1.86	1.84	0.980915595	0.00035931	0.000637786	-0.16062423	0.619208907	-0.229508869	-0.07272918	96.24	88.9	0.985872599	0.888576141	1.363730111	1.259703176	-0.432079208	0.962172408	-1.659251589	-1.596044042	-1.614713177	1.003582785
DEU	2015	Germany	3	9	0.026	0.024	0.032	0.955	0.963	0.945	0.99	0.975	2.893	2.057	-0.944	1.781	1.473	0.871	0	2.605	0	10	0	10	10	1.42	0.7	1.74	1.79	1.84	0.766410906	0.000279508	0.000518195	-0.189385849	0.867137216	-0.238776402	-0.073077969	50.75	51.86	-1.129761924	-1.316550929	1.363730111	1.259703176	-0.221453911	0.962172408	-1.639458708	-1.589264735	-1.555125089	1.003582785
DEU	2016	Germany	3	9	0.023	0.024	0.022	0.955	0.963	0.945	0.988	0.975	2.893	2.057	-0.737	1.781	1.476	0.871	0	2.605	0	10	0	10	10	1.36	0.68	1.73	1.62	1.84	0.798364189	0.000289787	0.000534738	-0.185101429	1.115065526	-0.237582638	-0.073029722	42.81	45.53	-1.499032931	-1.693399049	1.363730111	1.259703176	-0.036710537	0.962172408	-1.649355148	-1.589264735	-1.588229582	1.003582785
DEU	2017	Germany	3	9	0.023	0.025	0.022	0.951	0.95	0.926	0.988	0.973	2.429	2.057	-0.973	1.768	1.49	0.86	0	2.582	0	10	0	10	10	1.39	0.59	1.72	1.61	1.84	0.814837349	0.000295124	0.000538557	-0.182892644	1.362993835	-0.236962885	-0.073018583	52.81	54.28	-1.033956096	-1.172479452	1.0316311	1.259703176	-0.247335833	0.962172408	-1.649355148	-1.585875082	-1.588229582	0.988631998
DEU	2018	Germany	3	9	0.029	0.037	0.036	0.952	0.937	0.935	0.986	0.961	2.256	2.057	-1.03	1.695	1.491	0.855	0	2.395	0	10	0	10	10	1.42	0.6	1.62	1.63	1.95	NA	NA	NA	NA	1.610922145	NA	NA	68.35	67.1	-0.311226694	-0.409257826	0.907809702	1.259703176	-0.298207197	0.962172408	-1.629562267	-1.545199242	-1.541883291	0.992369695
DJI	2005	Djibouti	1	3	0.73	0.671	0.73	0.613	0.44	0.423	0.295	0.304	0.305	1.025	-0.437	-0.284	0.044	0.557	0	-0.28	0	3	1	2	2	-1.11	-0.81	-0.8	-0.96	-0.71	NA	NA	NA	NA	-1.612145878	NA	NA	53.39	60.88	-1.00698164	-0.779557242	-0.488580751	0.219312411	0.231033484	-0.317861146	0.682906002	0.603840977	0.755568572	-0.274709456
DJI	2006	Djibouti	1	3	0.73	0.671	0.73	0.613	0.44	0.423	0.295	0.304	0.305	1.025	-0.453	-0.278	0.045	0.557	0	-0.28	0	3	1	2	2	-1.12	-0.26	-0.88	-0.88	-0.66	NA	NA	NA	NA	-1.364217568	NA	NA	64.29	71.49	-0.500047889	-0.147905022	-0.488580751	0.219312411	0.216753803	-0.317861146	0.682906002	0.603840977	0.755568572	-0.274709456
DJI	2007	Djibouti	1	3	0.73	0.671	0.73	0.613	0.426	0.423	0.295	0.304	0.295	1.025	-0.453	-0.283	0.044	0.541	0	-0.28	0	3	1	2	2	-1.2	-0.12	-0.86	-0.76	-0.54	NA	NA	NA	NA	-1.116289259	NA	NA	71.12	74.52	-0.182400411	0.032481993	-0.495738057	0.219312411	0.216753803	-0.317861146	0.682906002	0.603840977	0.755568572	-0.274709456
DJI	2008	Djibouti	1	3	0.73	0.671	0.73	0.613	0.397	0.423	0.295	0.309	0.295	1.105	-0.453	-0.289	0.036	0.541	0	-0.28	0	3	1	2	2	-1.2	0.27	-0.87	-0.64	-0.33	NA	NA	NA	NA	-0.868360949	NA	NA	96.99	94.32	1.020753362	1.211248623	-0.495738057	0.299962858	0.216753803	-0.317861146	0.682906002	0.603840977	0.755568572	-0.274709456
DJI	2009	Djibouti	1	3	0.73	0.671	0.73	0.613	0.418	0.423	0.295	0.314	0.295	1.105	-0.453	-0.288	0.04	0.541	0	-0.28	0	3	1	2	2	-1.21	0.49	-0.89	-0.68	-0.37	NA	NA	NA	NA	-0.62043264	NA	NA	61.76	64.02	-0.617712328	-0.592621524	-0.495738057	0.299962858	0.216753803	-0.317861146	0.682906002	0.603840977	0.755568572	-0.274709456
DJI	2010	Djibouti	1	3	0.73	0.671	0.73	0.613	0.421	0.423	0.295	0.285	0.295	0.855	-0.453	-0.279	0.045	0.579	0	-0.28	0	3	1	2	2	-1.27	0.25	-0.97	-0.73	-0.4	0.005367177	1.92E-06	0.002683589	-0.291429542	-0.372504331	-0.271013202	-0.066762569	79.04	79.04	0.185940443	0.301574173	-0.495738057	0.047930212	0.216753803	-0.317861146	0.682906002	0.603840977	0.755568572	-0.274709456
DJI	2011	Djibouti	1	3	0.73	0.671	0.73	0.613	0.421	0.423	0.295	0.285	0.295	0.855	-0.453	-0.257	0.088	0.579	0	-0.28	0	3	1	2	2	-1.41	0.18	-0.95	-0.81	-0.41	0.005652533	2.00E-06	0.002826267	-0.29139128	-0.124576021	-0.271003593	-0.066346447	104.01	93.67	1.3472373	1.172551738	-0.495738057	0.047930212	0.216753803	-0.317861146	0.682906002	0.603840977	0.755568572	-0.274709456
DJI	2012	Djibouti	1	3	0.73	0.671	0.73	0.613	0.406	0.467	0.295	0.314	0.295	0.855	-0.453	-0.263	0.091	0.579	0	-0.28	0	3	1	2	2	-1.43	0.16	-1.06	-0.79	-0.46	0.005713146	2.01E-06	0.002856573	-0.291383153	0.123352288	-0.271002999	-0.066258057	105.01	95.27	1.393744984	1.267805608	-0.495738057	0.047930212	0.216753803	-0.317861146	0.682906002	0.603840977	0.755568572	-0.274709456
DJI	2013	Djibouti	1	3	0.73	0.693	0.729	0.487	0.45	0.395	0.301	0.311	0.201	0.855	-0.472	-0.198	0.111	0.649	0	-0.007	0	3	0	3	3	-1.47	-0.1	-0.96	-0.77	-0.54	0.005843981	2.04E-06	5.15E-06	-0.29136561	0.371280598	-0.270999324	-0.074574264	104.08	94.83	1.350492838	1.241610794	-0.563016736	0.047930212	0.199796681	-0.157856952	0.682906002	0.678413351	0.752258123	-0.745659229
DJI	2014	Djibouti	1	3	0.73	0.693	0.729	0.487	0.469	0.395	0.301	0.311	0.207	0.855	-0.472	-0.195	0.115	0.614	0	-0.007	0	3	0	3	3	-1.43	-0.77	-0.97	-0.87	-0.6	0.005843981	2.03E-06	4.93E-06	-0.29136561	0.619208907	-0.271000884	-0.074574923	96.24	88.9	0.985872599	0.888576141	-0.558722352	0.047930212	0.199796681	-0.157856952	0.682906002	0.678413351	0.752258123	-0.745659229
DJI	2015	Djibouti	1	3	0.73	0.693	0.729	0.487	0.469	0.395	0.301	0.311	0.207	0.855	-0.472	-0.199	0.103	0.614	0	-0.007	0	3	0	3	3	-1.41	-0.44	-0.95	-0.92	-0.66	0.005475461	1.89E-06	4.35E-06	-0.291415022	0.867137216	-0.271017016	-0.074576609	50.75	51.86	-1.129761924	-1.316550929	-0.558722352	0.047930212	0.199796681	-0.157856952	0.682906002	0.678413351	0.752258123	-0.745659229
DJI	2016	Djibouti	1	3	0.73	0.693	0.729	0.487	0.469	0.395	0.296	0.311	0.207	0.855	-0.472	-0.203	0.106	0.614	0	-0.007	0	3	0	3	3	-1.37	-0.63	-0.97	-0.98	-0.65	0.006001035	2.05E-06	4.52E-06	-0.291344551	1.115065526	-0.270998029	-0.074576124	42.81	45.53	-1.499032931	-1.693399049	-0.558722352	0.047930212	0.199796681	-0.157856952	0.682906002	0.678413351	0.752258123	-0.745659229
DJI	2017	Djibouti	1	3	0.746	0.733	0.721	0.518	0.444	0.36	0.295	0.34	0.247	0.855	-0.288	-0.168	0.11	0.653	0	-0.011	0	3	0	3	3	-1.41	-0.74	-1.03	-0.91	-0.64	0.006170987	2.10E-06	4.47E-06	-0.291321764	1.362993835	-0.270992698	-0.074576252	52.81	54.28	-1.033956096	-1.172479452	-0.530093127	0.047930212	0.364013014	-0.157856952	0.735687018	0.813999484	0.725774528	-0.629790634
DJI	2018	Djibouti	1	3	0.762	0.775	0.749	0.554	0.495	0.363	0.275	0.414	0.219	0.855	0.761	-0.157	0.071	0.627	0	-0.499	0	3	0	3	3	-1.35	-0.13	-0.9	-0.92	-0.72	NA	NA	NA	NA	1.610922145	NA	NA	68.35	67.1	-0.311226694	-0.409257826	-0.550133585	0.047930212	1.300224607	-0.157856952	0.788468034	0.956364925	0.81846711	-0.495233556
DMA	2005	Dominica	NA	NA	NA	NA	NA	NA	NA	NA	NA	NA	NA	NA	NA	NA	NA	NA	NA	NA	0	NA	NA	NA	NA	0.93	0.83	0.49	0.62	0.66	NA	NA	NA	NA	-1.612145878	NA	NA	53.39	60.88	-1.00698164	-0.779557242	NA	NA	NA	NA	NA	NA	NA	NA
DMA	2006	Dominica	NA	NA	NA	NA	NA	NA	NA	NA	NA	NA	NA	NA	NA	NA	NA	NA	NA	NA	0	NA	NA	NA	NA	1.01	0.91	0.45	0.7	0.62	NA	NA	NA	NA	-1.364217568	NA	NA	64.29	71.49	-0.500047889	-0.147905022	NA	NA	NA	NA	NA	NA	NA	NA
DMA	2007	Dominica	NA	NA	NA	NA	NA	NA	NA	NA	NA	NA	NA	NA	NA	NA	NA	NA	NA	NA	0	NA	NA	NA	NA	1	0.79	0.48	0.65	0.62	NA	NA	NA	NA	-1.116289259	NA	NA	71.12	74.52	-0.182400411	0.032481993	NA	NA	NA	NA	NA	NA	NA	NA
DMA	2008	Dominica	NA	NA	NA	NA	NA	NA	NA	NA	NA	NA	NA	NA	NA	NA	NA	NA	NA	NA	0	NA	NA	NA	NA	1.03	0.92	0.54	0.64	0.68	NA	NA	NA	NA	-0.868360949	NA	NA	96.99	94.32	1.020753362	1.211248623	NA	NA	NA	NA	NA	NA	NA	NA
DMA	2009	Dominica	NA	NA	NA	NA	NA	NA	NA	NA	NA	NA	NA	NA	NA	NA	NA	NA	NA	NA	0	NA	NA	NA	NA	1.01	0.67	0.63	0.71	0.73	NA	NA	NA	NA	-0.62043264	NA	NA	61.76	64.02	-0.617712328	-0.592621524	NA	NA	NA	NA	NA	NA	NA	NA
DMA	2010	Dominica	NA	NA	NA	NA	NA	NA	NA	NA	NA	NA	NA	NA	NA	NA	NA	NA	NA	NA	0	NA	NA	NA	NA	0.98	0.9	0.65	0.71	0.71	0	0	0	-0.292149193	-0.372504331	-0.271236208	-0.074589294	79.04	79.04	0.185940443	0.301574173	NA	NA	NA	NA	NA	NA	NA	NA
DMA	2011	Dominica	NA	NA	NA	NA	NA	NA	NA	NA	NA	NA	NA	NA	NA	NA	NA	NA	NA	NA	0	NA	NA	NA	NA	0.99	1.14	0.6	0.65	0.71	0.000500988	1.95E-07	2.34E-07	-0.292082019	-0.124576021	-0.271213569	-0.074588611	104.01	93.67	1.3472373	1.172551738	NA	NA	NA	NA	NA	NA	NA	NA
DMA	2012	Dominica	NA	NA	NA	NA	NA	NA	NA	NA	NA	NA	NA	NA	NA	NA	NA	NA	NA	NA	0	NA	NA	NA	NA	0.95	0.98	0.66	0.64	0.66	0.000485906	1.89E-07	2.36E-07	-0.292084041	0.123352288	-0.271214268	-0.074588605	105.01	95.27	1.393744984	1.267805608	NA	NA	NA	NA	NA	NA	NA	NA
DMA	2013	Dominica	NA	NA	NA	NA	NA	NA	NA	NA	NA	NA	NA	NA	NA	NA	NA	NA	NA	NA	0	NA	NA	NA	NA	0.97	1.12	0.71	0.65	0.67	0.000508447	1.98E-07	2.44E-07	-0.292081019	0.371280598	-0.271213259	-0.074588582	104.08	94.83	1.350492838	1.241610794	NA	NA	NA	NA	NA	NA	NA	NA
DMA	2014	Dominica	NA	NA	NA	NA	NA	NA	NA	NA	NA	NA	NA	NA	NA	NA	NA	NA	NA	NA	0	NA	NA	NA	NA	1.07	1.06	0.08	0.49	0.62	0.000517182	2.01E-07	2.37E-07	-0.292079848	0.619208907	-0.271212883	-0.074588601	96.24	88.9	0.985872599	0.888576141	NA	NA	NA	NA	NA	NA	NA	NA
DMA	2015	Dominica	NA	NA	NA	NA	NA	NA	NA	NA	NA	NA	NA	NA	NA	NA	NA	NA	NA	NA	0	NA	NA	NA	NA	0.88	1.08	0.12	0.67	0.62	0.000441395	1.71E-07	2.00E-07	-0.29209001	0.867137216	-0.271216309	-0.074588712	50.75	51.86	-1.129761924	-1.316550929	NA	NA	NA	NA	NA	NA	NA	NA
DMA	2016	Dominica	NA	NA	NA	NA	NA	NA	NA	NA	NA	NA	NA	NA	NA	NA	NA	NA	NA	NA	0	NA	NA	NA	NA	0.9	1	0.05	0.61	0.62	0.000527383	2.04E-07	2.31E-07	-0.29207848	1.115065526	-0.27121246	-0.074588619	42.81	45.53	-1.499032931	-1.693399049	NA	NA	NA	NA	NA	NA	NA	NA
DMA	2017	Dominica	NA	NA	NA	NA	NA	NA	NA	NA	NA	NA	NA	NA	NA	NA	NA	NA	NA	NA	0	NA	NA	NA	NA	0.88	1.2	-0.25	0.65	0.65	0.000510794	1.98E-07	2.35E-07	-0.292080704	1.362993835	-0.27121326	-0.074588609	52.81	54.28	-1.033956096	-1.172479452	NA	NA	NA	NA	NA	NA	NA	NA
DMA	2018	Dominica	NA	NA	NA	NA	NA	NA	NA	NA	NA	NA	NA	NA	NA	NA	NA	NA	NA	NA	0	NA	NA	NA	NA	0.81	1.11	-0.29	0.62	0.55	NA	NA	NA	NA	1.610922145	NA	NA	68.35	67.1	-0.311226694	-0.409257826	NA	NA	NA	NA	NA	NA	NA	NA
DNK	2005	Denmark	3	9	0.006	0.012	0.007	0.975	0.983	0.954	0.998	0.991	3.029	1.978	-2.234	2.016	1.537	0.968	0	2.571	0	10	0	10	10	1.74	1.07	2.12	1.95	2.29	NA	NA	NA	NA	-1.612145878	NA	NA	53.39	60.88	-1.00698164	-0.779557242	1.461069476	1.180060859	-1.372753201	0.962172408	-1.705434978	-1.629940575	-1.637886323	1.078336717
DNK	2006	Denmark	3	9	0.006	0.012	0.007	0.975	0.983	0.954	0.998	0.991	3.029	1.978	-2.234	2.016	1.539	0.97	0	2.571	0	10	0	10	10	1.57	1.05	2.23	2	2.47	NA	NA	NA	NA	-1.364217568	NA	NA	64.29	71.49	-0.500047889	-0.147905022	1.461069476	1.180060859	-1.372753201	0.962172408	-1.705434978	-1.629940575	-1.637886323	1.078336717
DNK	2007	Denmark	3	9	0.006	0.012	0.007	0.975	0.987	0.954	0.998	0.991	3.029	1.978	-2.234	2.011	1.54	0.97	0	2.571	0	10	0	10	10	1.48	1.12	2.35	2.01	2.45	NA	NA	NA	NA	-1.116289259	NA	NA	71.12	74.52	-0.182400411	0.032481993	1.461069476	1.180060859	-1.372753201	0.962172408	-1.705434978	-1.629940575	-1.637886323	1.078336717
DNK	2008	Denmark	3	9	0.006	0.012	0.007	0.975	0.983	0.954	0.998	0.991	3.029	1.978	-2.234	2.017	1.54	0.964	0	2.571	0	10	0	10	10	1.54	1.07	2.25	1.97	2.39	NA	NA	NA	NA	-0.868360949	NA	NA	96.99	94.32	1.020753362	1.211248623	1.461069476	1.180060859	-1.372753201	0.962172408	-1.705434978	-1.629940575	-1.637886323	1.078336717
DNK	2009	Denmark	3	9	0.006	0.012	0.007	0.975	0.983	0.954	0.998	0.991	3.029	1.978	-2.234	2.012	1.541	0.964	0	2.571	0	10	0	10	10	1.54	1	2.23	1.92	2.45	NA	NA	NA	NA	-0.62043264	NA	NA	61.76	64.02	-0.617712328	-0.592621524	1.461069476	1.180060859	-1.372753201	0.962172408	-1.705434978	-1.629940575	-1.637886323	1.078336717
DNK	2010	Denmark	3	9	0.006	0.012	0.007	0.979	0.984	0.958	0.997	0.988	3.029	1.978	-2.234	2.004	1.539	0.967	0	2.571	0	10	0	10	10	1.54	1.04	2.1	1.9	2.36	0	0	0	-0.292149193	-0.372504331	-0.271236208	-0.074589294	79.04	79.04	0.185940443	0.301574173	1.461069476	1.180060859	-1.372753201	0.962172408	-1.705434978	-1.629940575	-1.637886323	1.093287503
DNK	2011	Denmark	3	9	0.006	0.012	0.007	0.981	0.98	0.958	0.998	0.987	3.029	1.978	-2.234	2.055	1.607	0.967	0	2.571	0	10	0	10	10	1.55	1.1	2.1	1.92	2.4	0	0	0	-0.292149193	-0.124576021	-0.271236208	-0.074589294	104.01	93.67	1.3472373	1.172551738	1.461069476	1.180060859	-1.372753201	0.962172408	-1.705434978	-1.629940575	-1.637886323	1.100762897
DNK	2012	Denmark	3	9	0.006	0.012	0.007	0.981	0.986	0.961	0.998	0.99	3.029	1.978	-2.234	2.057	1.628	0.965	0	2.571	0	10	0	10	10	1.67	0.91	1.98	1.87	2.38	0	0	0	-0.292149193	0.123352288	-0.271236208	-0.074589294	105.01	95.27	1.393744984	1.267805608	1.461069476	1.180060859	-1.372753201	0.962172408	-1.705434978	-1.629940575	-1.637886323	1.100762897
DNK	2013	Denmark	3	9	0.007	0.012	0.007	0.931	0.985	0.947	0.997	0.989	3.029	1.978	-1.984	1.98	1.574	0.973	0	2.571	0	10	0	10	10	1.67	0.96	1.99	1.9	2.4	0	0	0	-0.292149193	0.371280598	-0.271236208	-0.074589294	104.08	94.83	1.350492838	1.241610794	1.461069476	1.180060859	-1.149633184	0.962172408	-1.702136164	-1.629940575	-1.637886323	0.913878066
DNK	2014	Denmark	3	9	0.007	0.012	0.007	0.931	0.981	0.947	0.996	0.981	3.029	1.978	-1.984	1.977	1.576	0.965	0	2.571	0	10	0	10	10	1.52	0.95	1.82	2.1	2.25	0	0	0	-0.292149193	0.619208907	-0.271236208	-0.074589294	96.24	88.9	0.985872599	0.888576141	1.461069476	1.180060859	-1.149633184	0.962172408	-1.702136164	-1.629940575	-1.637886323	0.913878066
DNK	2015	Denmark	3	9	0.014	0.026	0.015	0.965	0.975	0.944	0.993	0.985	2.669	1.978	-1.836	1.886	1.484	0.955	0	2.571	0	10	0	10	10	1.55	0.9	1.85	2.04	2.21	0	0	0	-0.292149193	0.867137216	-0.271236208	-0.074589294	50.75	51.86	-1.129761924	-1.316550929	1.203406451	1.180060859	-1.017546133	0.962172408	-1.67904447	-1.582485428	-1.611402728	1.040959751
DNK	2016	Denmark	3	9	0.014	0.026	0.015	0.965	0.973	0.944	0.993	0.981	2.669	1.978	-1.836	1.89	1.464	0.949	0	2.571	0	10	0	10	10	1.54	0.87	1.88	1.91	2.23	0	0	0	-0.292149193	1.115065526	-0.271236208	-0.074589294	42.81	45.53	-1.499032931	-1.693399049	1.203406451	1.180060859	-1.017546133	0.962172408	-1.67904447	-1.582485428	-1.611402728	1.040959751
DNK	2017	Denmark	3	9	0.014	0.025	0.016	0.966	0.97	0.94	0.992	0.979	2.598	1.978	-1.894	1.87	1.466	0.952	0	2.571	0	10	0	10	10	1.52	0.87	1.8	1.86	2.19	0	0	0	-0.292149193	1.362993835	-0.271236208	-0.074589294	52.81	54.28	-1.033956096	-1.172479452	1.152589576	1.180060859	-1.069309977	0.962172408	-1.67904447	-1.585875082	-1.608092278	1.044697447
DNK	2018	Denmark	3	9	0.017	0.029	0.017	0.966	0.975	0.913	0.992	0.974	2.598	1.978	-1.894	1.886	1.467	0.957	0	2.571	0	10	0	10	10	1.61	0.96	1.87	1.83	2.15	NA	NA	NA	NA	1.610922145	NA	NA	68.35	67.1	-0.311226694	-0.409257826	1.152589576	1.180060859	-1.069309977	0.962172408	-1.669148029	-1.572316468	-1.604781829	1.044697447
DOM	2005	Dominican Republic	2	6	0.843	0.762	0.775	0.878	0.891	0.889	0.316	0.892	1.788	0.233	-1.079	0.905	1.05	0.876	0	NA	0	8	0	8	8	-0.07	-0.26	-0.55	-0.67	-0.69	NA	NA	NA	NA	-1.612145878	NA	NA	53.39	60.88	-1.00698164	-0.779557242	0.572847769	-0.579127013	-0.341938721	0.642164019	1.055671929	0.912299431	0.904538794	0.715780146
DOM	2006	Dominican Republic	2	6	0.843	0.762	0.775	0.878	0.902	0.911	0.316	0.883	1.879	0.233	-1.079	0.874	0.966	0.88	0	NA	0	8	0	8	8	0.21	-0.11	-0.59	-0.58	-0.7	NA	NA	NA	NA	-1.364217568	NA	NA	64.29	71.49	-0.500047889	-0.147905022	0.637979256	-0.579127013	-0.341938721	0.642164019	1.055671929	0.912299431	0.904538794	0.715780146
DOM	2007	Dominican Republic	2	6	0.843	0.762	0.775	0.878	0.904	0.916	0.316	0.883	1.77	0.233	-1.079	0.909	0.964	0.897	0	NA	0	8	0	8	8	0.2	-0.08	-0.67	-0.61	-0.75	NA	NA	NA	NA	-1.116289259	NA	NA	71.12	74.52	-0.182400411	0.032481993	0.559964617	-0.579127013	-0.341938721	0.642164019	1.055671929	0.912299431	0.904538794	0.715780146
DOM	2008	Dominican Republic	2	6	0.843	0.762	0.775	0.878	0.904	0.921	0.316	0.883	1.77	0.233	-1.079	0.904	0.943	0.897	0	NA	0	8	0	8	8	0.16	-0.04	-0.62	-0.66	-0.73	NA	NA	NA	NA	-0.868360949	NA	NA	96.99	94.32	1.020753362	1.211248623	0.559964617	-0.579127013	-0.341938721	0.642164019	1.055671929	0.912299431	0.904538794	0.715780146
DOM	2009	Dominican Republic	2	6	0.843	0.762	0.775	0.878	0.904	0.921	0.306	0.883	1.77	0.233	-1.079	0.908	0.945	0.897	0	NA	0	8	0	8	8	0.09	0	-0.61	-0.77	-0.78	NA	NA	NA	NA	-0.62043264	NA	NA	61.76	64.02	-0.617712328	-0.592621524	0.559964617	-0.579127013	-0.341938721	0.642164019	1.055671929	0.912299431	0.904538794	0.715780146
DOM	2010	Dominican Republic	2	6	0.843	0.762	0.77	0.902	0.916	0.904	0.346	0.882	2.246	0.233	-1.079	0.903	0.912	0.911	0	NA	0	8	0	8	8	0.07	-0.04	-0.64	-0.81	-0.84	0	0	0	-0.292149193	-0.372504331	-0.271236208	-0.074589294	79.04	79.04	0.185940443	0.301574173	0.900652396	-0.579127013	-0.341938721	0.642164019	1.055671929	0.912299431	0.887986547	0.805484864
DOM	2011	Dominican Republic	2	6	0.841	0.752	0.77	0.902	0.915	0.904	0.365	0.882	2.236	0.233	-1.079	0.927	0.912	0.897	0	NA	0	8	0	8	8	0.09	0	-0.59	-0.77	-0.81	1.103666911	0.000367155	0.000482372	-0.144165257	-0.124576021	-0.228597823	-0.073182449	104.01	93.67	1.3472373	1.172551738	0.893495089	-0.579127013	-0.341938721	0.642164019	1.049074302	0.878402898	0.887986547	0.805484864
DOM	2012	Dominican Republic	2	6	0.841	0.752	0.77	0.902	0.915	0.904	0.365	0.882	2.236	0.233	-1.079	0.929	0.936	0.897	0	NA	0	8	0	8	8	0.12	0.25	-0.51	-0.69	-0.86	1.154188038	0.00038155	0.000491772	-0.137391189	0.123352288	-0.226926092	-0.073155035	105.01	95.27	1.393744984	1.267805608	0.893495089	-0.579127013	-0.341938721	0.642164019	1.049074302	0.878402898	0.887986547	0.805484864
DOM	2013	Dominican Republic	2	6	0.857	0.75	0.807	0.902	0.884	0.913	0.307	0.888	1.998	0.233	-1.129	0.764	0.913	0.907	0	NA	0	8	0	8	8	0.12	0.21	-0.47	-0.53	-0.87	1.19240749	0.108400681	0.000501222	-0.132266577	0.371280598	12.31754562	-0.073127472	104.08	94.83	1.350492838	1.241610794	0.7231512	-0.579127013	-0.386562724	0.642164019	1.101855318	0.871623591	1.010473173	0.805484864
DOM	2014	Dominican Republic	2	6	0.857	0.75	0.807	0.902	0.89	0.913	0.281	0.888	1.998	0.233	-1.129	0.758	0.916	0.907	0	NA	0	8	0	8	8	0.19	0.15	-0.44	-0.41	-0.82	1.132299548	0.031452765	0.000462352	-0.140326083	0.619208907	3.381434569	-0.073240838	96.24	88.9	0.985872599	0.888576141	0.7231512	-0.579127013	-0.386562724	0.642164019	1.101855318	0.871623591	1.010473173	0.805484864
DOM	2015	Dominican Republic	2	6	0.831	0.745	0.705	0.878	0.863	0.906	0.303	0.842	1.61	0.233	-1.562	0.707	0.891	0.868	0	NA	0	8	0	8	8	0.15	0.24	-0.36	-0.51	-0.82	1.184103605	0.020773747	0.000469324	-0.133379994	0.867137216	2.141259473	-0.073220504	50.75	51.86	-1.129761924	-1.316550929	0.445447717	-0.579127013	-0.773006594	0.642164019	1.016086167	0.854675324	0.672807338	0.715780146
DOM	2016	Dominican Republic	2	5	0.827	0.745	0.705	0.878	0.858	0.906	0.318	0.842	1.49	0.233	-1.451	0.648	0.762	0.868	0	NA	0	8	1	7	7	0.18	0.25	-0.26	-0.4	-0.76	1.179881022	0.013407739	0.000459455	-0.133946174	1.115065526	1.285830577	-0.073249286	42.81	45.53	-1.499032931	-1.693399049	0.359560042	-0.579127013	-0.673941307	0.482159825	1.002890913	0.854675324	0.672807338	0.715780146
DOM	2017	Dominican Republic	2	6	0.856	0.782	0.792	0.853	0.832	0.901	0.235	0.819	1.628	0.233	-1.451	0.667	0.782	0.863	0	NA	0	8	1	7	7	0.16	0.16	-0.37	-0.42	-0.74	1.211339172	0.010533384	0.000462167	-0.129728143	1.362993835	0.952026168	-0.073241377	52.81	54.28	-1.033956096	-1.172479452	0.458330868	-0.579127013	-0.673941307	0.482159825	1.098556504	0.980092498	0.960816433	0.62233773
DOM	2018	Dominican Republic	2	6	0.88	0.783	0.887	0.873	0.851	0.901	0.222	0.847	2.157	0.233	-1.451	0.685	0.771	0.902	0	NA	0	8	1	7	7	0.14	0.03	-0.4	-0.4	-0.75	NA	NA	NA	NA	1.610922145	NA	NA	68.35	67.1	-0.311226694	-0.409257826	0.83695237	-0.579127013	-0.673941307	0.482159825	1.177728028	0.983482151	1.275309123	0.697091663
DZA	2005	Algeria	1	3	0.73	0.695	0.698	0.735	0.568	0.518	0.214	0.667	-0.395	-0.935	-0.117	0.021	0.312	0.391	0	-0.454	0	3	1	2	2	-0.72	-0.92	-0.47	-0.75	-0.48	NA	NA	NA	NA	-1.612145878	NA	NA	53.39	60.88	-1.00698164	-0.779557242	-0.98959219	-1.756623537	0.516627106	-0.317861146	0.682906002	0.685192657	0.649634192	0.18128953
DZA	2006	Algeria	1	3	0.729	0.695	0.698	0.735	0.58	0.518	0.214	0.64	-0.395	-0.935	-0.117	0.023	0.312	0.391	0	-0.454	0	3	1	2	2	-0.92	-1.13	-0.47	-0.71	-0.52	NA	NA	NA	NA	-1.364217568	NA	NA	64.29	71.49	-0.500047889	-0.147905022	-0.98959219	-1.756623537	0.516627106	-0.317861146	0.679607189	0.685192657	0.649634192	0.18128953
DZA	2007	Algeria	1	3	0.731	0.695	0.698	0.735	0.559	0.518	0.214	0.711	-0.395	-0.935	-0.117	-0.021	0.252	0.391	0	-0.454	0	3	1	2	2	-0.98	-1.15	-0.57	-0.77	-0.56	NA	NA	NA	NA	-1.116289259	NA	NA	71.12	74.52	-0.182400411	0.032481993	-0.98959219	-1.756623537	0.516627106	-0.317861146	0.686204816	0.685192657	0.649634192	0.18128953
DZA	2008	Algeria	1	3	0.73	0.695	0.698	0.735	0.547	0.518	0.235	0.655	-0.395	-0.935	-0.117	-0.018	0.254	0.391	0	-0.454	0	3	1	2	2	-0.98	-1.09	-0.63	-0.74	-0.59	NA	NA	NA	NA	-0.868360949	NA	NA	96.99	94.32	1.020753362	1.211248623	-0.98959219	-1.756623537	0.516627106	-0.317861146	0.682906002	0.685192657	0.649634192	0.18128953
DZA	2009	Algeria	1	3	0.73	0.695	0.698	0.735	0.548	0.518	0.226	0.669	-0.395	-1.163	-0.117	-0.028	0.238	0.391	0	-0.454	0	3	1	2	2	-1.04	-1.2	-0.58	-0.79	-0.58	NA	NA	NA	NA	-0.62043264	NA	NA	61.76	64.02	-0.617712328	-0.592621524	-0.98959219	-1.98647731	0.516627106	-0.317861146	0.682906002	0.685192657	0.649634192	0.18128953
DZA	2010	Algeria	1	3	0.743	0.695	0.698	0.727	0.534	0.466	0.253	0.637	-0.546	-1.16	0.086	-0.067	0.241	0.305	0	-0.454	0	3	1	2	2	-1.02	-1.26	-0.48	-0.78	-0.52	6.796158018	0.004161762	0.03432403	0.619106008	-0.372504331	0.212077352	0.025517234	79.04	79.04	0.185940443	0.301574173	-1.097667514	-1.983452918	0.69780056	-0.317861146	0.725790578	0.685192657	0.649634192	0.151387957
DZA	2011	Algeria	1	3	0.745	0.695	0.698	0.735	0.537	0.497	0.242	0.633	-0.546	-1.16	0.086	-0.072	0.226	0.305	0	-0.454	0	3	1	2	2	-1	-1.36	-0.56	-0.81	-0.54	20.93099787	0.01257117	0.023256664	2.514360106	-0.124576021	1.188678193	-0.006760898	104.01	93.67	1.3472373	1.172551738	-1.097667514	-1.983452918	0.69780056	-0.317861146	0.732388205	0.685192657	0.649634192	0.18128953
DZA	2012	Algeria	1	3	0.738	0.695	0.698	0.506	0.533	0.441	0.256	0.535	-0.546	-1.16	0.086	-0.037	0.307	0.326	0	-0.454	0	3	1	2	2	-0.91	-1.33	-0.53	-0.77	-0.5	22.95990517	0.013521734	0.024767967	2.786403859	0.123352288	1.299069108	-0.002353163	105.01	95.27	1.393744984	1.267805608	-1.097667514	-1.983452918	0.69780056	-0.317861146	0.70929651	0.685192657	0.649634192	-0.674642994
DZA	2013	Algeria	1	3	0.691	0.654	0.683	0.587	0.546	0.427	0.243	0.622	-0.701	-1.16	-0.215	-0.032	0.281	0.28	0	-1.166	0	3	1	2	2	-0.89	-1.2	-0.53	-0.69	-0.47	15.56722716	0.008926162	0.016756972	1.795164946	0.371280598	0.765376382	-0.025717344	104.08	94.83	1.350492838	1.241610794	-1.208605761	-1.983452918	0.429164059	-0.317861146	0.554252275	0.54621687	0.599977452	-0.371889568
DZA	2014	Algeria	1	3	0.689	0.654	0.683	0.587	0.535	0.495	0.236	0.636	-0.701	-1.219	-0.215	-0.048	0.21	0.28	0	-1.166	0	3	1	2	2	-0.82	-1.19	-0.48	-0.77	-0.6	13.93423471	0.007859128	0.014871115	1.57620699	0.619208907	0.641459657	-0.031217473	96.24	88.9	0.985872599	0.888576141	-1.208605761	-2.042932623	0.429164059	-0.317861146	0.547654648	0.54621687	0.599977452	-0.371889568
DZA	2015	Algeria	1	3	0.691	0.654	0.683	0.59	0.524	0.506	0.243	0.592	-0.701	-1.219	-0.215	-0.056	0.211	0.28	0	-1.166	0	3	1	2	2	-0.85	-1.09	-0.5	-0.86	-0.65	9.683218036	0.005424772	0.046110562	1.006214202	0.867137216	0.358753113	0.059892823	50.75	51.86	-1.129761924	-1.316550929	-1.208605761	-2.042932623	0.429164059	-0.317861146	0.554252275	0.54621687	0.599977452	-0.360676478
DZA	2016	Algeria	1	3	0.69	0.655	0.672	0.615	0.475	0.515	0.281	0.543	-0.784	-1.219	-0.52	-0.087	0.215	0.265	0	-1.166	0	3	1	2	2	-0.86	-1.1	-0.53	-0.86	-0.68	6.208953864	0.00344559	0.031678336	0.5403714	1.115065526	0.128906902	0.017801028	42.81	45.53	-1.499032931	-1.693399049	-1.268011403	-2.042932623	0.156957638	-0.317861146	0.550953462	0.549606524	0.563562508	-0.267234063
DZA	2017	Algeria	1	3	0.73	0.701	0.704	0.606	0.464	0.572	0.255	0.52	-0.962	-1.219	-0.225	-0.077	0.194	0.259	0	-1.283	0	3	1	2	2	-0.9	-0.92	-0.59	-0.86	-0.6	6.73557135	0.003692747	0.031183201	0.610982313	1.362993835	0.157609733	0.016356959	52.81	54.28	-1.033956096	-1.172479452	-1.395411455	-2.042932623	0.420239259	-0.317861146	0.682906002	0.705530577	0.669496888	-0.300873333
DZA	2018	Algeria	1	3	0.77	0.746	0.754	0.586	0.507	0.57	0.234	0.639	-0.785	-1.219	-0.207	-0.109	0.177	0.313	0	-1.313	0	3	1	2	2	-0.98	-0.79	-0.44	-0.78	-0.64	NA	NA	NA	NA	1.610922145	NA	NA	68.35	67.1	-0.311226694	-0.409257826	-1.268727134	-2.042932623	0.4363039	-0.317861146	0.814858543	0.858064978	0.835019357	-0.375627265
ECU	2005	Ecuador	2	6	0.631	0.619	0.323	0.804	0.872	0.903	0.459	0.818	1.347	-0.46	-0.891	1.068	1.176	0.857	0.1	NA	0	6	0	6	6	-0.36	-0.79	-0.95	-0.79	-0.71	NA	NA	NA	NA	-1.612145878	NA	NA	53.39	60.88	-1.00698164	-0.779557242	0.257210562	-1.277761508	-0.174152468	0.322155631	0.356323465	0.427579003	-0.591784322	0.439190596
ECU	2006	Ecuador	2	6	0.598	0.589	0.323	0.857	0.887	0.903	0.49	0.857	1.578	-0.327	-1.058	1.118	1.214	0.79	0.1	NA	0	7	0	7	7	-0.25	-0.85	-1	-1.03	-0.75	NA	NA	NA	NA	-1.364217568	NA	NA	64.29	71.49	-0.500047889	-0.147905022	0.422544337	-1.14368014	-0.323196639	0.482159825	0.247462619	0.325889403	-0.591784322	0.637288517
ECU	2007	Ecuador	2	6	0.59	0.565	0.279	0.942	0.862	0.921	0.459	0.896	0.936	-0.094	-1.132	0.985	1.148	0.814	0.1	NA	0	5	0	5	5	-0.16	-0.81	-0.87	-1.04	-0.77	NA	NA	NA	NA	-1.116289259	NA	NA	71.12	74.52	-0.182400411	0.032481993	-0.036954725	-0.908785714	-0.389240164	0.162151437	0.221072111	0.244537723	-0.737444094	0.954992729
ECU	2008	Ecuador	2	6	0.562	0.537	0.245	0.94	0.835	0.91	0.439	0.825	0.936	-0.034	-1.228	0.824	1.105	0.814	0.1	NA	0	5	0	5	5	-0.22	-0.73	-0.86	-1.17	-0.69	NA	NA	NA	NA	-0.868360949	NA	NA	96.99	94.32	1.020753362	1.211248623	-0.036954725	-0.848297879	-0.474918251	0.162151437	0.128705333	0.149627429	-0.849999373	0.947517335
ECU	2009	Ecuador	2	6	0.548	0.537	0.245	0.94	0.791	0.91	0.484	0.791	-0.018	-0.034	-1.228	0.663	0.999	0.609	0.1	NA	0	5	0	5	5	-0.25	-0.67	-0.79	-1.25	-0.8	NA	NA	NA	NA	-0.62043264	NA	NA	61.76	64.02	-0.617712328	-0.592621524	-0.719761743	-0.848297879	-0.474918251	0.162151437	0.082521944	0.149627429	-0.849999373	0.947517335
ECU	2010	Ecuador	2	6	0.546	0.491	0.273	0.912	0.742	0.914	0.448	0.695	-0.033	-0.034	-1.228	0.645	0.999	0.627	0.1	NA	0	5	0	5	5	-0.23	-0.59	-0.72	-1.2	-0.77	2.399080913	0.004165071	0.000965425	0.029528872	-0.372504331	0.212461589	-0.071773618	79.04	79.04	0.185940443	0.301574173	-0.730497703	-0.848297879	-0.474918251	0.162151437	0.075924317	-0.006296624	-0.75730679	0.84286183
ECU	2011	Ecuador	2	6	0.546	0.491	0.269	0.912	0.732	0.914	0.434	0.693	-0.033	-0.034	-1.228	0.635	1.004	0.614	0.1	NA	0	5	0	5	5	-0.29	-0.69	-0.58	-1.21	-0.71	4.276685041	0.007260925	0.001639833	0.281285309	-0.124576021	0.571989172	-0.069806696	104.01	93.67	1.3472373	1.172551738	-0.730497703	-0.848297879	-0.474918251	0.162151437	0.075924317	-0.006296624	-0.770548588	0.84286183
ECU	2012	Ecuador	2	6	0.551	0.491	0.288	0.912	0.704	0.884	0.443	0.68	-0.033	-0.034	-1.228	0.609	0.997	0.614	0.1	NA	0	5	0	5	5	-0.3	-0.57	-0.5	-1.13	-0.58	4.870163095	0.008063184	0.001782637	0.360861146	0.123352288	0.665157019	-0.069390208	105.01	95.27	1.393744984	1.267805608	-0.730497703	-0.848297879	-0.474918251	0.162151437	0.092418384	-0.006296624	-0.70765005	0.84286183
ECU	2013	Ecuador	2	6	0.578	0.584	0.292	0.878	0.719	0.888	0.425	0.765	-0.607	-0.034	-1.653	0.583	1.004	0.419	0.1	NA	0	6	1	5	5	-0.25	-0.18	-0.5	-0.97	-0.57	5.226691659	0.00845743	0.00185871	0.408665877	0.371280598	0.710941566	-0.06916834	104.08	94.83	1.350492838	1.241610794	-1.141327083	-0.848297879	-0.854222281	0.162151437	0.181486349	0.308941136	-0.694408252	0.715780146
ECU	2014	Ecuador	2	6	0.578	0.584	0.292	0.878	0.728	0.908	0.426	0.728	-0.607	-0.034	-1.653	0.584	1.003	0.419	0.1	NA	0	6	1	5	5	-0.2	-0.02	-0.47	-1.06	-0.75	4.928781507	0.007737491	0.308048844	0.36872093	0.619208907	0.627333618	0.823839584	96.24	88.9	0.985872599	0.888576141	-1.141327083	-0.848297879	-0.854222281	0.162151437	0.181486349	0.308941136	-0.694408252	0.715780146
ECU	2015	Ecuador	2	6	0.578	0.584	0.292	0.904	0.693	0.908	0.408	0.745	-0.607	-0.034	-1.653	0.573	1.001	0.419	0.1	NA	0	6	1	5	5	-0.21	-0.14	-0.44	-1.03	-0.67	1.535224499	0.002329627	0.000538486	-0.086300344	0.867137216	-0.000692041	-0.07301879	50.75	51.86	-1.129761924	-1.316550929	-1.141327083	-0.848297879	-0.854222281	0.162151437	0.181486349	0.308941136	-0.694408252	0.812960257
ECU	2016	Ecuador	2	6	0.578	0.584	0.292	0.902	0.703	0.89	0.432	0.771	-0.607	-0.034	-1.653	0.571	1.003	0.419	0.1	NA	0	6	1	5	5	-0.25	-0.09	-0.43	-0.76	-0.68	0.610132236	0.000894622	0.000213333	-0.210340299	1.115065526	-0.16734201	-0.073967105	42.81	45.53	-1.499032931	-1.693399049	-1.141327083	-0.848297879	-0.854222281	0.162151437	0.181486349	0.308941136	-0.694408252	0.805484864
ECU	2017	Ecuador	2	6	0.502	0.383	0.213	0.937	0.717	0.901	0.56	0.78	0.148	-0.034	-1.798	0.691	0.918	0.467	0.1	NA	0	6	1	5	5	-0.17	-0.07	-0.32	-0.7	-0.6	1.31177543	0.001868626	0.048584275	-0.116261261	1.362993835	-0.054229041	0.067107443	52.81	54.28	-1.033956096	-1.172479452	-0.600950459	-0.848297879	-0.983631891	0.162151437	-0.069223478	-0.372379185	-0.955933752	0.936304246
ECU	2018	Ecuador	2	6	0.522	0.392	0.212	0.952	0.898	0.901	0.645	0.92	1.302	-0.156	-1.546	0.993	0.951	0.873	0.1	NA	0	6	1	5	5	0.03	-0.07	-0.26	-0.63	-0.56	NA	NA	NA	NA	1.610922145	NA	NA	68.35	67.1	-0.311226694	-0.409257826	0.225002684	-0.97128981	-0.758726913	0.162151437	-0.003247208	-0.341872305	-0.959244202	0.992369695
EGY	2005	Egypt Arab Rep.	1	3	0.878	0.904	0.943	0.17	0.363	0.391	0.231	0.399	-0.52	-0.986	0.778	-0.298	-0.292	0.323	0	-0.401	0	1	4	-3	-3	-0.96	-0.63	-0.42	-0.02	-0.62	NA	NA	NA	NA	-1.612145878	NA	NA	53.39	60.88	-1.00698164	-0.779557242	-1.079058518	-1.808038196	1.315396768	-1.117882117	1.171130401	1.393630206	1.460694288	-1.930509055
EGY	2006	Egypt Arab Rep.	1	3	0.878	0.904	0.943	0.17	0.353	0.401	0.231	0.398	-0.52	-0.986	0.778	-0.305	-0.293	0.323	0	-0.401	0	1	4	-3	-3	-1.2	-0.84	-0.51	-0.26	-0.75	NA	NA	NA	NA	-1.364217568	NA	NA	64.29	71.49	-0.500047889	-0.147905022	-1.079058518	-1.808038196	1.315396768	-1.117882117	1.171130401	1.393630206	1.460694288	-1.930509055
EGY	2007	Egypt Arab Rep.	1	3	0.878	0.904	0.943	0.17	0.372	0.34	0.231	0.366	-0.52	-0.986	0.968	-0.293	-0.287	0.362	0	-0.401	0	1	4	-3	-3	-1.17	-0.55	-0.39	-0.23	-0.76	NA	NA	NA	NA	-1.116289259	NA	NA	71.12	74.52	-0.182400411	0.032481993	-1.079058518	-1.808038196	1.484967982	-1.117882117	1.171130401	1.393630206	1.460694288	-1.930509055
EGY	2008	Egypt Arab Rep.	1	3	0.878	0.904	0.943	0.17	0.341	0.352	0.206	0.376	-0.52	-0.986	1.352	-0.294	-0.289	0.362	0	-0.401	0	1	4	-3	-3	-1.21	-0.51	-0.37	-0.13	-0.78	NA	NA	NA	NA	-0.868360949	NA	NA	96.99	94.32	1.020753362	1.211248623	-1.079058518	-1.808038196	1.827680328	-1.117882117	1.171130401	1.393630206	1.460694288	-1.930509055
EGY	2009	Egypt Arab Rep.	1	3	0.878	0.904	0.943	0.17	0.345	0.381	0.223	0.385	-0.52	-0.986	1.544	-0.288	-0.29	0.362	0	-0.401	0	1	4	-3	-3	-1.16	-0.61	-0.28	-0.11	-0.52	NA	NA	NA	NA	-0.62043264	NA	NA	61.76	64.02	-0.617712328	-0.592621524	-1.079058518	-1.808038196	1.999036502	-1.117882117	1.171130401	1.393630206	1.460694288	-1.930509055
EGY	2010	Egypt Arab Rep.	1	3	0.878	0.904	0.943	0.17	0.353	0.328	0.232	0.361	-0.52	-0.986	1.644	-0.283	-0.33	0.362	0	-0.401	0	1	4	-3	-3	-1.19	-0.9	-0.37	-0.18	-0.63	14.83931581	0.005364901	0.015636792	1.697563771	-0.372504331	0.351800161	-0.028984365	79.04	79.04	0.185940443	0.301574173	-1.079058518	-1.808038196	2.088284509	-1.117882117	1.171130401	1.393630206	1.460694288	-1.930509055
EGY	2011	Egypt Arab Rep.	1	3	0.734	0.553	0.869	0.284	0.406	0.37	0.31	0.511	-0.713	-0.808	2.225	-0.043	-0.128	0.373	0	-0.363	0	0	2	-2	-2	-1.14	-1.44	-0.57	-0.45	-0.7	21.49601949	0.007663465	0.021713151	2.590120395	-0.124576021	0.618736889	-0.011262577	104.01	93.67	1.3472373	1.172551738	-1.217194529	-1.628590952	2.606815429	-0.957877923	0.696101256	0.203861883	1.215721034	-1.504411641
EGY	2012	Egypt Arab Rep.	1	3	0.732	0.62	0.791	0.385	0.552	0.4	0.321	0.62	-0.627	-0.808	1.9	0.263	0.523	0.394	0	0.291	0	-88	-88	-88	-3	-0.77	-1.44	-0.81	-0.47	-0.6	21.17580255	0.007466785	0.019607225	2.547184466	0.123352288	0.595896063	-0.017404542	105.01	95.27	1.393744984	1.267805608	-1.155641695	-1.628590952	2.316759406	-1.117882117	0.689503629	0.430968657	0.957505984	-1.126904284
EGY	2013	Egypt Arab Rep.	0	0	0.797	0.761	0.771	0.135	0.509	0.375	0.224	0.563	-1.008	-0.955	1.642	-0.092	0.448	0.306	0	-0.947	1	0	4	-4	-4	-1.05	-1.64	-0.88	-0.63	-0.63	27.73305722	0.009669825	0.025303884	3.426406581	0.371280598	0.851739334	-0.000790152	104.08	94.83	1.350492838	1.241610794	-1.428335064	-1.776786148	2.086499548	-1.277886311	0.903926507	0.908909778	0.891296996	-2.061328436
EGY	2014	Egypt Arab Rep.	1	3	0.793	0.737	0.771	0.183	0.229	0.18	0.236	0.151	-1.012	-1.04	1.032	-0.402	0.048	0.248	0	-0.947	0	0	4	-4	-4	-1.18	-1.63	-0.82	-0.66	-0.62	23.16342947	0.008015027	0.016108087	2.813693186	0.619208907	0.659564519	-0.027609826	96.24	88.9	0.985872599	0.888576141	-1.431197986	-1.862477248	1.542086706	-1.277886311	0.890731253	0.827558098	0.891296996	-1.881918999
EGY	2015	Egypt Arab Rep.	1	3	0.848	0.735	0.904	0.096	0.212	0.178	0.242	0.138	-1.072	-1.04	1.25	-0.477	-0.032	0.242	0	-1.11	0	0	4	-4	-4	-1.19	-1.5	-0.77	-0.6	-0.64	15.35389928	0.005263592	0.010423557	1.766561117	0.867137216	0.340035021	-0.04418884	50.75	51.86	-1.129761924	-1.316550929	-1.474141824	-1.862477248	1.736647361	-1.277886311	1.072165996	0.820778791	1.331586762	-2.207098604
EGY	2016	Egypt Arab Rep.	1	3	0.821	0.735	0.904	0.096	0.184	0.213	0.251	0.152	-1.072	-1.04	1.25	-0.383	-0.031	0.242	0	-1.11	0	0	4	-4	-4	-1.21	-1.44	-0.66	-0.52	-0.64	13.55763455	0.004605175	0.009197852	1.525710981	1.115065526	0.263571693	-0.047763625	42.81	45.53	-1.499032931	-1.693399049	-1.474141824	-1.862477248	1.736647361	-1.277886311	0.983098031	0.820778791	1.331586762	-2.207098604
EGY	2017	Egypt Arab Rep.	1	3	0.824	0.74	0.897	0.118	0.234	0.228	0.234	0.199	-0.941	-1.04	0.556	-0.378	-0.057	0.255	0	-0.563	0	0	4	-4	-4	-1.25	-1.42	-0.62	-0.54	-0.55	14.83531109	0.004968289	0.015015497	1.697026803	1.362993835	0.305740859	-0.030796381	52.81	54.28	-1.033956096	-1.172479452	-1.380381112	-1.862477248	1.117266193	-1.277886311	0.992994472	0.837727058	1.308413617	-2.124869279
EGY	2018	Egypt Arab Rep.	1	3	0.81	0.745	0.896	0.13	0.218	0.201	0.233	0.215	-0.957	-0.547	0.236	-0.442	-0.199	0.239	0	0.007	0	0	4	-4	-4	-1.28	-1.16	-0.58	-0.41	-0.59	NA	NA	NA	NA	1.610922145	NA	NA	68.35	67.1	-0.311226694	-0.409257826	-1.391832802	-1.365468869	0.831672571	-1.277886311	0.946811083	0.854675324	1.305103167	-2.08001692
ERI	2005	Eritrea	0	0	0.568	0.601	0.621	0.06	0.028	0.013	0.057	0.031	-2.373	-0.219	-2.326	-1.675	-1.428	0.044	0	NA	0	0	7	-7	-7	-2.18	-0.8	-0.94	-1.04	-0.36	NA	NA	NA	NA	-1.612145878	NA	NA	53.39	60.88	-1.00698164	-0.779557242	-2.405307369	-1.034802037	-1.454861367	-1.757898894	0.148498214	0.366565243	0.394729591	-2.341655682
ERI	2006	Eritrea	0	0	0.568	0.601	0.621	0.06	0.028	0.013	0.057	0.031	-2.373	-0.344	-2.326	-1.676	-1.422	0.044	0	NA	0	0	7	-7	-7	-2.08	-0.9	-1.3	-1.19	-0.35	NA	NA	NA	NA	-1.364217568	NA	NA	64.29	71.49	-0.500047889	-0.147905022	-2.405307369	-1.16081836	-1.454861367	-1.757898894	0.148498214	0.366565243	0.394729591	-2.341655682
ERI	2007	Eritrea	0	0	0.568	0.601	0.621	0.06	0.028	0.013	0.057	0.031	-2.373	-0.344	-2.326	-1.677	-1.436	0.044	0	NA	0	0	7	-7	-7	-2.12	-1.05	-1.29	-1.28	-0.44	NA	NA	NA	NA	-1.116289259	NA	NA	71.12	74.52	-0.182400411	0.032481993	-2.405307369	-1.16081836	-1.454861367	-1.757898894	0.148498214	0.366565243	0.394729591	-2.341655682
ERI	2008	Eritrea	0	0	0.568	0.601	0.621	0.06	0.028	0.013	0.057	0.031	-2.373	-0.344	-2.326	-1.667	-1.41	0.044	0	NA	0	0	7	-7	-7	-2.16	-0.71	-1.3	-1.3	-0.39	NA	NA	NA	NA	-0.868360949	NA	NA	96.99	94.32	1.020753362	1.211248623	-2.405307369	-1.16081836	-1.454861367	-1.757898894	0.148498214	0.366565243	0.394729591	-2.341655682
ERI	2009	Eritrea	0	0	0.568	0.601	0.621	0.06	0.027	0.013	0.057	0.027	-2.373	-0.344	-2.326	-1.691	-1.421	0.044	0	NA	0	0	7	-7	-7	-2.2	-0.68	-1.37	-1.31	-0.49	NA	NA	NA	NA	-0.62043264	NA	NA	61.76	64.02	-0.617712328	-0.592621524	-2.405307369	-1.16081836	-1.454861367	-1.757898894	0.148498214	0.366565243	0.394729591	-2.341655682
ERI	2010	Eritrea	0	0	0.577	0.604	0.651	0.058	0.028	0.013	0.058	0.028	-2.373	-0.211	-2.326	-1.67	-1.428	0.044	0	NA	0	0	7	-7	-7	-2.2	-0.88	-1.36	-1.35	-0.56	0	0	0	-0.292149193	-0.372504331	-0.271236208	-0.074589294	79.04	79.04	0.185940443	0.301574173	-2.405307369	-1.026736993	-1.454861367	-1.757898894	0.178187535	0.376734203	0.494043072	-2.349131076
ERI	2011	Eritrea	0	0	0.571	0.574	0.651	0.058	0.028	0.013	0.052	0.028	-2.373	-0.211	-2.326	-1.663	-1.427	0.044	0	NA	0	0	7	-7	-7	-2.23	-0.77	-1.41	-1.35	-0.63	0	0	0	-0.292149193	-0.124576021	-0.271236208	-0.074589294	104.01	93.67	1.3472373	1.172551738	-2.405307369	-1.026736993	-1.454861367	-1.757898894	0.158394654	0.275044603	0.494043072	-2.349131076
ERI	2012	Eritrea	0	0	0.582	0.62	0.651	0.068	0.026	0.015	0.052	0.03	-2.373	-0.34	-2.326	-1.683	-1.417	0.044	0	NA	0	0	7	-7	-7	-2.21	-0.7	-1.45	-1.39	-0.78	0	0	0	-0.292149193	0.123352288	-0.271236208	-0.074589294	105.01	95.27	1.393744984	1.267805608	-2.405307369	-1.156785838	-1.454861367	-1.757898894	0.194681603	0.430968657	0.494043072	-2.311754109
ERI	2013	Eritrea	0	0	0.569	0.582	0.652	0.103	0.042	0.012	0.061	0.03	-1.801	-0.34	-2.231	-1.608	-1.439	0.109	0	NA	0	0	7	-7	-7	-2.2	-0.77	-1.52	-1.41	-0.9	0	0	0	-0.292149193	0.371280598	-0.271236208	-0.074589294	104.08	94.83	1.350492838	1.241610794	-1.995909451	-1.156785838	-1.370075761	-1.757898894	0.151797027	0.30216183	0.497353521	-2.180934728
ERI	2014	Eritrea	0	0	0.57	0.582	0.657	0.103	0.042	0.017	0.062	0.03	-1.801	-0.34	-2.231	-1.605	-1.447	0.109	0	NA	0	0	7	-7	-7	-2.11	-0.81	-1.61	-1.53	-0.89	0	0	0	-0.292149193	0.619208907	-0.271236208	-0.074589294	96.24	88.9	0.985872599	0.888576141	-1.995909451	-1.156785838	-1.370075761	-1.757898894	0.155095841	0.30216183	0.513905768	-2.180934728
ERI	2015	Eritrea	0	0	0.57	0.582	0.657	0.103	0.042	0.011	0.062	0.03	-1.801	-0.34	-2.231	-1.614	-1.436	0.114	0	NA	0	0	7	-7	-7	-2.11	-0.88	-1.59	-1.49	-1.3	0	0	0	-0.292149193	0.867137216	-0.271236208	-0.074589294	50.75	51.86	-1.129761924	-1.316550929	-1.995909451	-1.156785838	-1.370075761	-1.757898894	0.155095841	0.30216183	0.513905768	-2.180934728
ERI	2016	Eritrea	0	0	0.559	0.581	0.718	0.135	0.04	0.012	0.054	0.046	-2.179	-0.339	-2.231	-1.635	-1.419	0.068	0	NA	0	0	7	-7	-7	-2.17	-0.66	-1.7	-1.63	-1.31	0	0	0	-0.292149193	1.115065526	-0.271236208	-0.074589294	42.81	45.53	-1.499032931	-1.693399049	-2.266455628	-1.155777707	-1.370075761	-1.757898894	0.118808892	0.298772176	0.71584318	-2.061328436
ERI	2017	Eritrea	0	0	0.507	0.577	0.697	0.178	0.033	0.01	0.069	0.028	-2.179	-0.339	-2.102	-1.605	-1.421	0.068	0	NA	0	0	7	-7	-7	-2.17	-0.73	-1.72	-1.56	-1.2	0	0	0	-0.292149193	1.362993835	-0.271236208	-0.074589294	52.81	54.28	-1.033956096	-1.172479452	-2.266455628	-1.155777707	-1.254945832	-1.757898894	-0.05272941	0.285213563	0.646323743	-1.900607482
ERI	2018	Eritrea	0	0	0.546	0.649	0.688	0.21	0.035	0.019	0.072	0.036	-1.938	-0.488	-2.146	-1.573	-1.46	0.069	0	NA	0	0	7	-7	-7	-2.18	-0.61	-1.73	-1.59	-1.32	NA	NA	NA	NA	1.610922145	NA	NA	68.35	67.1	-0.311226694	-0.409257826	-2.093964547	-1.305989165	-1.294214955	-1.757898894	0.075924317	0.529268604	0.616529698	-1.781001191
ESP	2005	Spain	3	8	0.04	0.018	0.038	0.948	0.962	0.962	0.988	0.965	2.791	2.6	-0.099	1.752	1.559	0.949	0	2.201	0	10	0	10	10	1.13	0.2	1.51	1.13	1.34	NA	NA	NA	NA	-1.612145878	NA	NA	53.39	60.88	-1.00698164	-0.779557242	1.290725587	1.807118084	0.532691747	0.962172408	-1.593275319	-1.609602655	-1.535262392	0.977418908
ESP	2006	Spain	3	8	0.04	0.018	0.038	0.948	0.962	0.962	0.989	0.965	2.791	2.6	-0.099	1.742	1.554	0.95	0	2.201	0	10	0	10	10	1.08	-0.15	0.84	1.13	1.19	NA	NA	NA	NA	-1.364217568	NA	NA	64.29	71.49	-0.500047889	-0.147905022	1.290725587	1.807118084	0.532691747	0.962172408	-1.593275319	-1.609602655	-1.535262392	0.977418908
ESP	2007	Spain	3	8	0.04	0.018	0.038	0.948	0.962	0.962	0.988	0.965	2.791	2.6	-0.099	1.74	1.556	0.95	0	2.201	0	10	0	10	10	1.12	-0.28	0.99	1.17	1.09	NA	NA	NA	NA	-1.116289259	NA	NA	71.12	74.52	-0.182400411	0.032481993	1.290725587	1.807118084	0.532691747	0.962172408	-1.593275319	-1.609602655	-1.535262392	0.977418908
ESP	2008	Spain	3	8	0.04	0.018	0.038	0.948	0.962	0.962	0.989	0.965	2.791	2.6	-0.099	1.796	1.652	0.95	0	2.201	1	10	0	10	10	1.19	-0.38	0.92	1.19	1.19	NA	NA	NA	NA	-0.868360949	NA	NA	96.99	94.32	1.020753362	1.211248623	1.290725587	1.807118084	0.532691747	0.962172408	-1.593275319	-1.609602655	-1.535262392	0.977418908
ESP	2009	Spain	3	8	0.04	0.018	0.038	0.948	0.962	0.962	0.988	0.965	2.791	2.6	-0.099	1.8	1.659	0.95	0	2.201	0	10	0	10	10	1.18	-0.47	0.95	1.16	1.06	NA	NA	NA	NA	-0.62043264	NA	NA	61.76	64.02	-0.617712328	-0.592621524	1.290725587	1.807118084	0.532691747	0.962172408	-1.593275319	-1.609602655	-1.535262392	0.977418908
ESP	2010	Spain	3	8	0.045	0.018	0.06	0.948	0.973	0.962	0.985	0.978	2.793	2.6	-0.156	1.872	1.683	0.952	0	2.081	0	10	0	10	10	1.12	-0.32	0.99	1.19	1.08	0.462224137	0.000235588	0.003001455	-0.23017239	-0.372504331	-0.243876887	-0.065835506	79.04	79.04	0.185940443	0.301574173	1.292157048	1.807118084	0.481820383	0.962172408	-1.576781251	-1.609602655	-1.462432506	0.977418908
ESP	2011	Spain	3	8	0.05	0.035	0.06	0.948	0.976	0.962	0.983	0.978	2.793	2.6	-0.096	1.881	1.688	0.952	0	1.718	0	10	0	10	10	1.09	0.02	1.03	1.2	1.1	0.429911368	0.000218118	0.002514102	-0.234505011	-0.124576021	-0.245905694	-0.06725688	104.01	93.67	1.3472373	1.172551738	1.292157048	1.807118084	0.535369188	0.962172408	-1.560287183	-1.551978548	-1.462432506	0.977418908
ESP	2012	Spain	3	8	0.055	0.057	0.06	0.948	0.974	0.962	0.975	0.978	2.414	2.6	-1.179	1.842	1.694	0.944	0	1.718	0	10	0	10	10	1.06	-0.03	1.12	1.06	1.13	0.241042404	0.000122232	0.002042732	-0.259829294	0.123352288	-0.257041115	-0.068631636	105.01	95.27	1.393744984	1.267805608	1.020895141	1.807118084	-0.431186728	0.962172408	-1.543793116	-1.477406175	-1.462432506	0.977418908
ESP	2013	Spain	3	9	0.065	0.077	0.052	0.963	0.956	0.954	0.978	0.962	1.945	2.6	-0.707	1.706	1.698	0.909	0	1.718	0	10	0	10	10	0.99	0.01	1.15	1.02	0.9	0.204547502	0.000104042	0.001598027	-0.264722672	0.371280598	-0.259153553	-0.069928624	104.08	94.83	1.350492838	1.241610794	0.685217477	1.807118084	-0.009936135	0.962172408	-1.510804981	-1.409613108	-1.488916101	1.033484358
ESP	2014	Spain	3	9	0.065	0.077	0.052	0.963	0.955	0.957	0.978	0.961	1.819	2.6	-0.707	1.696	1.706	0.892	0	1.718	0	10	0	10	10	0.99	0.24	1.16	0.95	0.63	0.080480864	4.11E-05	0.000596155	-0.281358007	0.619208907	-0.266460327	-0.0728506	96.24	88.9	0.985872599	0.888576141	0.595035418	1.807118084	-0.009936135	0.962172408	-1.510804981	-1.409613108	-1.488916101	1.033484358
ESP	2015	Spain	3	9	0.066	0.067	0.029	0.936	0.943	0.954	0.979	0.945	2.009	2.6	-0.914	1.569	1.552	0.923	0	2.066	0	10	0	10	10	1.04	0.25	1.17	0.9	0.58	0.072089341	3.69E-05	0.000936225	-0.282483175	0.867137216	-0.266956108	-0.071858779	50.75	51.86	-1.129761924	-1.316550929	0.731024237	1.807118084	-0.194679509	0.962172408	-1.507506167	-1.443509641	-1.565056437	0.932566549
ESP	2016	Spain	3	9	0.079	0.067	0.029	0.936	0.943	0.954	0.979	0.945	2.009	2.6	-1.021	1.612	1.551	0.923	0	2.092	0	10	0	10	10	1.04	0.41	1.12	0.98	0.52	0.082279657	4.20E-05	0.00085708	-0.281116818	1.115065526	-0.266356077	-0.072089608	42.81	45.53	-1.499032931	-1.693399049	0.731024237	1.807118084	-0.290174877	0.962172408	-1.464621592	-1.443509641	-1.565056437	0.932566549
ESP	2017	Spain	3	9	0.06	0.079	0.029	0.935	0.93	0.939	0.982	0.946	1.892	2.6	-1.001	1.584	1.506	0.863	0	2.081	0	10	0	10	10	1.03	0.28	1.03	1.01	0.49	0.084911363	4.32E-05	0.000751428	-0.280763949	1.362993835	-0.266215372	-0.072397743	52.81	54.28	-1.033956096	-1.172479452	0.647283754	1.807118084	-0.272325275	0.962172408	-1.527299048	-1.402833801	-1.565056437	0.928828852
ESP	2018	Spain	3	9	0.05	0.025	0.029	0.935	0.933	0.932	0.984	0.949	2.035	2.6	-1.002	1.643	1.558	0.894	0	2.224	0	10	0	10	10	1.06	0.25	1	0.97	0.61	NA	NA	NA	NA	1.610922145	NA	NA	68.35	67.1	-0.311226694	-0.409257826	0.749633233	1.807118084	-0.273217755	0.962172408	-1.560287183	-1.585875082	-1.565056437	0.928828852
EST	2005	Estonia	3	9	0.046	0.052	0.069	0.971	0.962	0.953	0.978	0.966	2.896	1.728	-1.863	1.793	1.574	0.952	0	2.103	0	9	0	9	9	0.99	0.6	0.96	0.97	1.03	NA	NA	NA	NA	-1.612145878	NA	NA	53.39	60.88	-1.00698164	-0.779557242	1.365877303	0.928028213	-1.041643095	0.802168213	-1.573482438	-1.494354441	-1.432638462	1.06338593
EST	2006	Estonia	3	9	0.056	0.073	0.069	0.971	0.962	0.953	0.971	0.964	2.896	1.728	-1.863	1.8	1.573	0.952	0	2.093	0	9	0	9	9	1.07	0.74	1.16	1.14	1.02	NA	NA	NA	NA	-1.364217568	NA	NA	64.29	71.49	-0.500047889	-0.147905022	1.365877303	0.928028213	-1.041643095	0.802168213	-1.540494302	-1.423171721	-1.432638462	1.06338593
EST	2007	Estonia	3	9	0.055	0.072	0.067	0.971	0.956	0.955	0.975	0.966	2.896	1.728	-1.751	1.786	1.543	0.952	0	2.093	0	9	0	9	9	1.07	0.63	1.04	1.17	1	NA	NA	NA	NA	-1.116289259	NA	NA	71.12	74.52	-0.182400411	0.032481993	1.365877303	0.928028213	-0.941685327	0.802168213	-1.543793116	-1.426561375	-1.439259361	1.06338593
EST	2008	Estonia	3	9	0.05	0.051	0.068	0.971	0.963	0.952	0.98	0.974	2.896	1.728	-2.144	1.8	1.546	0.945	0	2.093	0	9	0	9	9	1.09	0.57	1.16	1.2	0.99	NA	NA	NA	NA	-0.868360949	NA	NA	96.99	94.32	1.020753362	1.211248623	1.365877303	0.928028213	-1.292429995	0.802168213	-1.560287183	-1.497744095	-1.435948911	1.06338593
EST	2009	Estonia	3	9	0.05	0.051	0.071	0.971	0.97	0.952	0.981	0.971	2.896	1.728	-2.057	1.807	1.548	0.945	0	2.093	0	9	0	9	9	1.09	0.57	1.01	1.13	1.01	NA	NA	NA	NA	-0.62043264	NA	NA	61.76	64.02	-0.617712328	-0.592621524	1.365877303	0.928028213	-1.214784229	0.802168213	-1.560287183	-1.497744095	-1.426017563	1.06338593
EST	2010	Estonia	3	9	0.041	0.026	0.06	0.971	0.969	0.961	0.98	0.977	2.896	1.716	-2.057	1.84	1.544	0.945	0	2.085	0	9	0	9	9	1.11	0.66	1.09	1.16	1	8.47E-07	1.87E-09	9.60E-10	-0.29214908	-0.372504331	-0.27123599	-0.074589291	79.04	79.04	0.185940443	0.301574173	1.365877303	0.915930646	-1.214784229	0.802168213	-1.589976505	-1.582485428	-1.462432506	1.06338593
EST	2011	Estonia	3	9	0.041	0.026	0.06	0.971	0.972	0.961	0.981	0.976	2.896	1.716	-2.057	1.894	1.668	0.945	0	1.874	0	9	0	9	9	1.13	0.61	1.08	1.18	1.05	1.39E-05	3.10E-08	1.13E-08	-0.29214733	-0.124576021	-0.271232612	-0.074589261	104.01	93.67	1.3472373	1.172551738	1.365877303	0.915930646	-1.214784229	0.802168213	-1.589976505	-1.582485428	-1.462432506	1.06338593
EST	2012	Estonia	3	9	0.044	0.028	0.07	0.971	0.972	0.961	0.983	0.976	2.896	1.716	-2.057	1.924	1.668	0.945	0	1.874	0	9	0	9	9	1.11	0.64	0.95	1.16	1.1	1.28E-05	2.89E-08	1.05E-08	-0.292147471	0.123352288	-0.271232855	-0.074589263	105.01	95.27	1.393744984	1.267805608	1.365877303	0.915930646	-1.214784229	0.802168213	-1.580080065	-1.575706122	-1.429328012	1.06338593
EST	2013	Estonia	3	9	0.034	0.031	0.05	0.965	0.966	0.948	0.984	0.973	2.896	1.716	-2.057	1.871	1.591	0.962	0	2.06	0	9	0	9	9	1.12	0.75	0.97	1.2	1.19	2.66E-05	6.05E-08	2.06E-08	-0.292145633	0.371280598	-0.271229183	-0.074589234	104.08	94.83	1.350492838	1.241610794	1.365877303	0.915930646	-1.214784229	0.802168213	-1.6130682	-1.565537162	-1.495537	1.040959751
EST	2014	Estonia	3	9	0.035	0.031	0.049	0.965	0.972	0.945	0.986	0.978	2.896	1.716	-2.057	1.876	1.601	0.957	0	2.06	0	9	0	9	9	1.17	0.78	1.02	1.37	1.3	6.63E-05	1.53E-07	4.94E-08	-0.292140299	0.619208907	-0.271218416	-0.07458915	96.24	88.9	0.985872599	0.888576141	1.365877303	0.915930646	-1.214784229	0.802168213	-1.609769386	-1.565537162	-1.498847449	1.040959751
EST	2015	Estonia	3	9	0.035	0.03	0.05	0.965	0.972	0.95	0.981	0.978	2.896	1.716	-2.057	1.853	1.575	0.957	0	2.06	0	9	0	9	9	1.19	0.62	1.07	1.33	1.29	9.98E-05	2.29E-07	8.21E-08	-0.29213581	0.867137216	-0.27120956	-0.074589054	50.75	51.86	-1.129761924	-1.316550929	1.365877303	0.915930646	-1.214784229	0.802168213	-1.609769386	-1.568926815	-1.495537	1.040959751
EST	2016	Estonia	3	9	0.035	0.031	0.05	0.964	0.97	0.935	0.984	0.981	2.634	1.716	-1.833	1.896	1.644	0.952	0	2.093	0	9	0	9	9	1.21	0.67	1.09	1.23	1.27	0.000121677	2.79E-07	9.76E-08	-0.292132879	1.115065526	-0.271203798	-0.074589009	42.81	45.53	-1.499032931	-1.693399049	1.178355879	0.915930646	-1.014868693	0.802168213	-1.609769386	-1.565537162	-1.495537	1.037222054
EST	2017	Estonia	3	9	0.036	0.032	0.051	0.954	0.969	0.929	0.985	0.975	2.6	1.716	-2.218	1.895	1.653	0.947	0	2.101	0	9	0	9	9	1.21	0.65	1.11	1.28	1.24	0.00012784	2.93E-07	9.49E-08	-0.292132052	1.362993835	-0.271202235	-0.074589017	52.81	54.28	-1.033956096	-1.172479452	1.154021037	0.915930646	-1.35847352	0.802168213	-1.606470573	-1.562147508	-1.49222655	0.999845088
EST	2018	Estonia	3	9	0.046	0.02	0.099	0.955	0.971	0.926	0.983	0.976	2.6	1.746	-2.218	1.912	1.648	0.947	0	2.056	0	9	0	9	9	1.21	0.6	1.19	1.24	1.51	NA	NA	NA	NA	1.610922145	NA	NA	68.35	67.1	-0.311226694	-0.409257826	1.154021037	0.946174564	-1.35847352	0.802168213	-1.573482438	-1.602823348	-1.333324981	1.003582785
ETH	2005	Ethiopia	1	3	0.631	0.427	0.669	0.363	0.4	0.509	0.326	0.377	-0.936	0.552	-0.435	-0.194	0.239	0.322	0	-1.665	0	1	4	-3	-3	-1.24	-1.69	-0.92	-0.94	-0.77	NA	NA	NA	NA	-1.612145878	NA	NA	53.39	60.88	-1.00698164	-0.779557242	-1.376802459	-0.257533356	0.232818444	-1.117882117	0.356323465	-0.223234438	0.55363116	-1.209133609
ETH	2006	Ethiopia	1	3	0.631	0.427	0.666	0.356	0.323	0.497	0.331	0.278	-0.936	0.552	-0.661	-0.236	0.237	0.295	0	-1.665	0	1	4	-3	-3	-1.19	-1.74	-0.66	-0.66	-0.65	NA	NA	NA	NA	-1.364217568	NA	NA	64.29	71.49	-0.500047889	-0.147905022	-1.376802459	-0.257533356	0.031117948	-1.117882117	0.356323465	-0.223234438	0.543699812	-1.235297485
ETH	2007	Ethiopia	1	3	0.614	0.401	0.629	0.361	0.339	0.509	0.348	0.278	-0.936	0.552	-0.661	-0.241	0.235	0.295	0	-1.333	0	1	4	-3	-3	-1.2	-1.8	-0.44	-0.65	-0.63	NA	NA	NA	NA	-1.116289259	NA	NA	71.12	74.52	-0.182400411	0.032481993	-1.376802459	-0.257533356	0.031117948	-1.117882117	0.300243635	-0.311365425	0.421213186	-1.216609002
ETH	2008	Ethiopia	1	3	0.619	0.414	0.63	0.358	0.332	0.46	0.352	0.279	-0.936	0.544	-0.661	-0.238	0.239	0.295	0	-1.333	0	1	4	-3	-3	-1.31	-1.73	-0.4	-0.7	-0.66	NA	NA	NA	NA	-0.868360949	NA	NA	96.99	94.32	1.020753362	1.211248623	-1.376802459	-0.2655984	0.031117948	-1.117882117	0.316737703	-0.267299932	0.424523635	-1.227822092
ETH	2009	Ethiopia	1	3	0.636	0.414	0.663	0.361	0.329	0.504	0.347	0.281	-1.014	0.544	-0.661	-0.241	0.238	0.314	0	-1.333	0	1	4	-3	-3	-1.3	-1.64	-0.5	-0.83	-0.7	NA	NA	NA	NA	-0.62043264	NA	NA	61.76	64.02	-0.617712328	-0.592621524	-1.432629448	-0.2655984	0.031117948	-1.117882117	0.372817532	-0.267299932	0.533768464	-1.216609002
ETH	2010	Ethiopia	1	3	0.636	0.414	0.663	0.367	0.319	0.446	0.347	0.265	-1.014	0.553	-0.718	-0.404	-0.041	0.307	0	-1.333	0	1	4	-3	-3	-1.34	-1.64	-0.43	-0.8	-0.69	0.370930516	0.000129832	0.000259211	-0.242413393	-0.372504331	-0.256158545	-0.073833302	79.04	79.04	0.185940443	0.301574173	-1.432629448	-0.256525225	-0.019753416	-1.117882117	0.372817532	-0.267299932	0.533768464	-1.194182823
ETH	2011	Ethiopia	1	3	0.636	0.414	0.663	0.361	0.317	0.476	0.337	0.301	-1.04	0.553	-0.718	-0.374	0	0.299	0	-1.333	0	1	4	-3	-3	-1.36	-1.51	-0.48	-0.74	-0.66	0.456694158	0.000158245	0.000283485	-0.230913871	-0.124576021	-0.252858945	-0.073762506	104.01	93.67	1.3472373	1.172551738	-1.451238444	-0.256525225	-0.019753416	-1.117882117	0.372817532	-0.267299932	0.533768464	-1.216609002
ETH	2012	Ethiopia	1	3	0.637	0.414	0.674	0.346	0.31	0.485	0.317	0.249	-0.963	0.538	-0.718	-0.366	0.016	0.316	0	-1.181	0	1	4	-3	-3	-1.31	-1.56	-0.43	-0.68	-0.6	0.60384054	0.000206512	0.000312709	-0.211183914	0.123352288	-0.24725359	-0.073677274	105.01	95.27	1.393744984	1.267805608	-1.396127186	-0.271647184	-0.019753416	-1.117882117	0.376116346	-0.267299932	0.570183407	-1.272674452
ETH	2013	Ethiopia	1	3	0.614	0.415	0.67	0.322	0.315	0.464	0.341	0.251	-0.341	0.538	-0.691	-0.379	0.02	0.274	0	-0.48	0	1	4	-3	-3	-1.31	-1.41	-0.61	-0.65	-0.49	0.748792508	0.000252204	0.000369045	-0.191748193	0.371280598	-0.241947313	-0.073512968	104.08	94.83	1.350492838	1.241610794	-0.950942736	-0.271647184	0.004343546	-1.117882117	0.300243635	-0.263910278	0.55694161	-1.36237917
ETH	2014	Ethiopia	1	3	0.618	0.422	0.67	0.322	0.311	0.466	0.357	0.285	-0.341	0.538	-0.691	-0.365	0.02	0.274	0	-0.48	0	1	4	-3	-3	-1.28	-1.34	-0.42	-0.47	-0.44	0.644254666	0.000214394	0.000286845	-0.205765031	0.619208907	-0.246338189	-0.073752705	96.24	88.9	0.985872599	0.888576141	-0.950942736	-0.271647184	0.004343546	-1.117882117	0.313438889	-0.240182705	0.55694161	-1.36237917
ETH	2015	Ethiopia	1	3	0.621	0.432	0.67	0.291	0.318	0.407	0.343	0.277	-0.341	0.538	-0.691	-0.355	0.059	0.274	0	-0.48	0	1	4	-3	-3	-1.3	-1.5	-0.65	-0.51	-0.45	0.742052091	0.037102605	0.000308289	-0.192651974	0.867137216	4.037561395	-0.073690164	50.75	51.86	-1.129761924	-1.316550929	-0.950942736	-0.271647184	0.004343546	-1.117882117	0.32333533	-0.206286172	0.55694161	-1.478247765
ETH	2016	Ethiopia	1	3	0.6	0.381	0.63	0.273	0.294	0.379	0.352	0.283	-0.509	0.538	-0.682	-0.412	0.063	0.234	0	-0.891	0	1	4	-3	-3	-1.4	-1.62	-0.64	-0.49	-0.42	0.622294751	0.007778684	0.00024356	-0.208709502	1.115065526	0.632117534	-0.073878949	42.81	45.53	-1.499032931	-1.693399049	-1.071185481	-0.271647184	0.012375867	-1.117882117	0.254060246	-0.379158492	0.424523635	-1.545526304
ETH	2017	Ethiopia	1	3	0.589	0.38	0.531	0.226	0.276	0.349	0.351	0.273	-0.442	0.538	-0.262	-0.413	0.061	0.268	0	-1.036	0	1	4	-3	-3	-1.44	-1.68	-0.7	-0.45	-0.56	0.664368878	0.004258775	0.000249388	-0.20306804	1.362993835	0.223343597	-0.073861951	52.81	54.28	-1.033956096	-1.172479452	-1.023231529	-0.271647184	0.387217496	-1.117882117	0.217773298	-0.382548145	0.096789147	-1.721198045
ETH	2018	Ethiopia	1	3	0.52	0.266	0.564	0.598	0.474	0.382	0.451	0.566	-0.25	0.733	-0.559	-0.055	0.166	0.23	0	-0.983	0	3	2	1	1	-1.16	-1.34	-0.61	-0.43	-0.49	NA	NA	NA	NA	1.610922145	NA	NA	68.35	67.1	-0.311226694	-0.409257826	-0.885811249	-0.07506172	0.122150915	-0.47786534	-0.009844835	-0.768968626	0.206033976	-0.330774906
FIN	2005	Finland	3	9	0.027	0.029	0.045	0.983	0.968	0.958	0.99	0.983	2.363	1.761	-0.983	1.917	1.511	0.934	0	2.521	0	10	0	10	10	1.69	1.6	2.13	1.96	2.33	NA	NA	NA	NA	-1.612145878	NA	NA	53.39	60.88	-1.00698164	-0.779557242	0.984392879	0.961296522	-0.256260634	0.962172408	-1.636159894	-1.572316468	-1.512089247	1.10823829
FIN	2006	Finland	3	9	0.027	0.029	0.045	0.983	0.968	0.958	0.99	0.983	2.363	1.761	-0.983	1.933	1.553	0.934	0	2.521	0	10	0	10	10	1.49	1.5	2.17	1.97	2.46	NA	NA	NA	NA	-1.364217568	NA	NA	64.29	71.49	-0.500047889	-0.147905022	0.984392879	0.961296522	-0.256260634	0.962172408	-1.636159894	-1.572316468	-1.512089247	1.10823829
FIN	2007	Finland	3	9	0.027	0.029	0.045	0.983	0.968	0.954	0.99	0.983	2.363	1.761	-0.983	1.931	1.557	0.934	0	2.521	0	10	0	10	10	1.46	1.49	1.97	1.91	2.4	NA	NA	NA	NA	-1.116289259	NA	NA	71.12	74.52	-0.182400411	0.032481993	0.984392879	0.961296522	-0.256260634	0.962172408	-1.636159894	-1.572316468	-1.512089247	1.10823829
FIN	2008	Finland	3	9	0.027	0.029	0.045	0.983	0.968	0.954	0.99	0.983	2.363	1.761	-0.983	1.932	1.551	0.934	0	2.521	0	10	0	10	10	1.46	1.45	2.05	1.92	2.34	NA	NA	NA	NA	-0.868360949	NA	NA	96.99	94.32	1.020753362	1.211248623	0.984392879	0.961296522	-0.256260634	0.962172408	-1.636159894	-1.572316468	-1.512089247	1.10823829
FIN	2009	Finland	3	9	0.027	0.029	0.045	0.983	0.968	0.954	0.99	0.984	2.363	1.761	-0.983	1.942	1.551	0.934	0	2.521	0	10	0	10	10	1.47	1.46	2.23	1.97	2.25	NA	NA	NA	NA	-0.62043264	NA	NA	61.76	64.02	-0.617712328	-0.592621524	0.984392879	0.961296522	-0.256260634	0.962172408	-1.636159894	-1.572316468	-1.512089247	1.10823829
FIN	2010	Finland	3	9	0.027	0.029	0.045	0.983	0.971	0.956	0.99	0.984	2.363	1.761	-0.983	1.937	1.549	0.934	0	2.521	0	10	0	10	10	1.49	1.42	2.23	1.97	2.16	0	0	0	-0.292149193	-0.372504331	-0.271236208	-0.074589294	79.04	79.04	0.185940443	0.301574173	0.984392879	0.961296522	-0.256260634	0.962172408	-1.636159894	-1.572316468	-1.512089247	1.10823829
FIN	2011	Finland	3	9	0.027	0.029	0.045	0.983	0.97	0.961	0.99	0.984	2.363	1.761	-0.95	1.924	1.569	0.934	0	2.521	0	10	0	10	10	1.51	1.39	2.24	1.95	2.2	0	0	0	-0.292149193	-0.124576021	-0.271236208	-0.074589294	104.01	93.67	1.3472373	1.172551738	0.984392879	0.961296522	-0.226808792	0.962172408	-1.636159894	-1.572316468	-1.512089247	1.10823829
FIN	2012	Finland	3	9	0.027	0.029	0.045	0.983	0.974	0.956	0.991	0.984	2.628	1.761	-0.95	1.942	1.584	0.943	0	2.521	0	10	0	10	10	1.6	1.4	2.22	1.95	2.24	0	0	0	-0.292149193	0.123352288	-0.271236208	-0.074589294	105.01	95.27	1.393744984	1.267805608	1.174061495	0.961296522	-0.226808792	0.962172408	-1.636159894	-1.572316468	-1.512089247	1.10823829
FIN	2013	Finland	3	9	0.028	0.029	0.039	0.97	0.968	0.956	0.985	0.977	2.628	1.761	-0.95	1.951	1.61	0.943	0	2.358	0	10	0	10	10	1.57	1.39	2.17	1.94	2.2	0	0	0	-0.292149193	0.371280598	-0.271236208	-0.074589294	104.08	94.83	1.350492838	1.241610794	1.174061495	0.961296522	-0.226808792	0.962172408	-1.632861081	-1.572316468	-1.531951943	1.059648234
FIN	2014	Finland	3	9	0.028	0.029	0.041	0.97	0.968	0.92	0.986	0.977	2.628	1.761	-0.95	1.951	1.616	0.943	0	2.366	0	10	0	10	10	1.54	1.28	2	2.1	2.17	0	0	0	-0.292149193	0.619208907	-0.271236208	-0.074589294	96.24	88.9	0.985872599	0.888576141	1.174061495	0.961296522	-0.226808792	0.962172408	-1.632861081	-1.572316468	-1.525331044	1.059648234
FIN	2015	Finland	3	9	0.031	0.035	0.041	0.961	0.938	0.937	0.985	0.948	2.139	1.761	-0.744	1.743	1.556	0.879	0	2.29	0	10	0	10	10	1.54	1.04	1.81	2.06	2.28	0.000259522	1.18E-07	2.63E-07	-0.292114396	0.867137216	-0.271222558	-0.074588525	50.75	51.86	-1.129761924	-1.316550929	0.824069219	0.961296522	-0.042957897	0.962172408	-1.62296464	-1.551978548	-1.525331044	1.026008964
FIN	2016	Finland	3	9	0.031	0.035	0.04	0.961	0.938	0.937	0.983	0.948	2.139	1.761	-0.744	1.734	1.552	0.879	0	2.29	0	10	0	10	10	1.53	1	1.83	2.02	2.24	0.001075179	4.87E-07	1.07E-06	-0.292005029	1.115065526	-0.271179709	-0.074586167	42.81	45.53	-1.499032931	-1.693399049	0.824069219	0.961296522	-0.042957897	0.962172408	-1.62296464	-1.551978548	-1.528641494	1.026008964
FIN	2017	Finland	3	9	0.035	0.035	0.04	0.956	0.941	0.929	0.984	0.955	2.142	1.761	-0.597	1.774	1.549	0.886	0	2.322	0	10	0	10	10	1.55	1.08	1.94	2.03	2.22	0.001104106	4.99E-07	1.07E-06	-0.292001151	1.362993835	-0.271178215	-0.07458617	52.81	54.28	-1.033956096	-1.172479452	0.82621641	0.961296522	0.088236673	0.962172408	-1.609769386	-1.551978548	-1.528641494	1.007320481
FIN	2018	Finland	3	9	0.054	0.042	0.04	0.95	0.949	0.926	0.98	0.971	2.134	1.761	-0.923	1.784	1.564	0.861	0	2.322	0	10	0	10	10	1.61	0.92	1.98	2.05	2.21	NA	NA	NA	NA	1.610922145	NA	NA	68.35	67.1	-0.311226694	-0.409257826	0.820490565	0.961296522	-0.20271183	0.962172408	-1.547091929	-1.528250975	-1.528641494	0.984894302
FJI	2005	Fiji	2	6	0.324	0.418	0.312	0.88	0.761	0.776	0.742	0.636	1.722	0.692	-1.029	0.939	1.092	0.79	0	1.157	0	7	1	6	6	0.05	0.38	-0.08	-0.05	-0.3	NA	NA	NA	NA	-1.612145878	NA	NA	53.39	60.88	-1.00698164	-0.779557242	0.525609547	-0.116395074	-0.297314717	0.322155631	-0.656412282	-0.253741318	-0.628199265	0.723255539
FJI	2006	Fiji	2	6	0.274	0.412	0.312	0.773	0.752	0.772	0.742	0.631	1.671	1.392	-0.98	0.651	0.867	0.778	0	0.802	0	0	3	-3	-3	-0.33	-0.04	-0.09	-0.06	0.01	NA	NA	NA	NA	-1.364217568	NA	NA	64.29	71.49	-0.500047889	-0.147905022	0.489107285	0.589296336	-0.253583194	-1.117882117	-0.821352958	-0.274079238	-0.628199265	0.323322001
FJI	2007	Fiji	0	0	0.221	0.347	0.216	0.664	0.423	0.714	0.628	0.232	0.5	0.928	-0.837	-0.243	-0.718	0.527	0	-0.885	0	0	4	-4	-4	-0.65	0.06	-0.43	-0.6	-0.05	NA	NA	NA	NA	-1.116289259	NA	NA	71.12	74.52	-0.182400411	0.032481993	-0.349013279	0.121523745	-0.125958544	-1.277886311	-0.996190074	-0.494406706	-0.946002404	-0.084086929
FJI	2008	Fiji	0	0	0.212	0.353	0.185	0.664	0.374	0.704	0.648	0.226	-0.309	0.965	-0.837	-0.269	-0.723	0.472	0	-0.885	0	0	4	-4	-4	-0.7	-0.07	-0.73	-0.56	-0.05	NA	NA	NA	NA	-0.868360949	NA	NA	96.99	94.32	1.020753362	1.211248623	-0.928039356	0.158824576	-0.125958544	-1.277886311	-1.025879395	-0.474068786	-1.048626335	-0.084086929
FJI	2009	Fiji	0	0	0.194	0.329	0.154	0.694	0.341	0.697	0.535	0.231	-0.107	0.965	-0.842	-0.5	-0.805	0.507	0	-0.851	0	0	4	-4	-4	-0.91	-0.27	-0.91	-0.77	-0.34	NA	NA	NA	NA	-0.62043264	NA	NA	61.76	64.02	-0.617712328	-0.592621524	-0.783461769	0.158824576	-0.130420944	-1.277886311	-1.085258038	-0.555420466	-1.151250265	0.028043969
FJI	2010	Fiji	0	0	0.204	0.352	0.158	0.756	0.349	0.724	0.577	0.23	0.089	0.924	-0.882	-0.42	-0.792	0.581	0	-0.727	0	0	4	-4	-4	-1.11	-0.19	-0.72	-0.85	-0.46	0	0	0	-0.292149193	-0.372504331	-0.271236208	-0.074589294	79.04	79.04	0.185940443	0.301574173	-0.643178566	0.117491222	-0.166120147	-1.277886311	-1.052269903	-0.477458439	-1.138008468	0.259781159
FJI	2011	Fiji	0	0	0.204	0.352	0.161	0.756	0.357	0.724	0.533	0.228	0.089	0.972	-0.732	-0.432	-0.801	0.581	0	-0.727	0	0	4	-4	-4	-1.09	-0.07	-0.71	-0.82	-0.13	0	0	0	-0.292149193	-0.124576021	-0.271236208	-0.074589294	104.01	93.67	1.3472373	1.172551738	-0.643178566	0.16588149	-0.032248137	-1.277886311	-1.052269903	-0.477458439	-1.12807712	0.259781159
FJI	2012	Fiji	0	0	0.222	0.357	0.184	0.751	0.378	0.688	0.53	0.293	0.093	0.942	-0.732	-0.336	-0.758	0.584	0	-0.727	0	0	4	-4	-4	-0.98	-0.07	-0.84	-0.79	-0.11	0	0	0	-0.292149193	0.123352288	-0.271236208	-0.074589294	105.01	95.27	1.393744984	1.267805608	-0.640315644	0.135637573	-0.032248137	-1.277886311	-0.99289126	-0.460510172	-1.051936784	0.241092676
FJI	2013	Fiji	0	0	0.201	0.322	0.158	0.768	0.438	0.71	0.552	0.302	0.97	0.935	-0.766	-0.237	-0.794	0.607	0	-0.727	0	0	4	-4	-4	-0.91	-0.05	-0.84	-0.82	-0.12	0	0	0	-0.292149193	0.371280598	-0.271236208	-0.074589294	104.08	94.83	1.350492838	1.241610794	-0.012619884	0.128580659	-0.062592459	-1.277886311	-1.062166344	-0.579148039	-1.138008468	0.304633518
FJI	2014	Fiji	1	3	0.203	0.325	0.157	0.804	0.456	0.762	0.67	0.317	1.176	1.913	-1.021	0.531	0.855	0.768	0	-0.597	0	3	1	2	2	-0.18	0.55	-0.37	-0.51	0.18	0	0	0	-0.292149193	0.619208907	-0.271236208	-0.074589294	96.24	88.9	0.985872599	0.888576141	0.134820625	1.114532371	-0.290174877	-0.317861146	-1.055568717	-0.568979079	-1.141318917	0.439190596
FJI	2015	Fiji	2	5	0.215	0.34	0.157	0.853	0.622	0.768	0.673	0.429	1.352	1.917	-1.448	0.675	0.837	0.853	0	0.249	0	3	1	2	2	0.03	0.58	-0.29	-0.4	0.17	0	0	0	-0.292149193	0.867137216	-0.271236208	-0.074589294	50.75	51.86	-1.129761924	-1.316550929	0.260789215	1.118564894	-0.671263866	-0.317861146	-1.015982955	-0.518134279	-1.141318917	0.62233773
FJI	2016	Fiji	1	4	0.216	0.331	0.155	0.865	0.632	0.734	0.717	0.434	0.791	1.917	-1.308	0.649	0.84	0.782	0	0.249	0	3	1	2	2	0.03	0.92	-0.25	-0.27	0.13	0	0	0	-0.292149193	1.115065526	-0.271236208	-0.074589294	42.81	45.53	-1.499032931	-1.693399049	-0.140735666	1.118564894	-0.546316657	-0.317861146	-1.012684141	-0.548641159	-1.147939816	0.66719009
FJI	2017	Fiji	2	5	0.23	0.312	0.159	0.863	0.684	0.742	0.712	0.52	1.349	1.885	-1.289	0.71	0.849	0.854	0	0.236	0	3	1	2	2	0.18	0.64	0.09	-0.25	0.36	0	0	0	-0.292149193	1.362993835	-0.271236208	-0.074589294	52.81	54.28	-1.033956096	-1.172479452	0.258642023	1.086304715	-0.529359535	-0.317861146	-0.966500752	-0.613044573	-1.134698018	0.659714696
FJI	2018	Fiji	2	5	0.261	0.333	0.16	0.855	0.683	0.727	0.702	0.522	0.815	1.942	-1.654	0.636	0.709	0.754	0	0.388	0	4	0	4	2	0.22	0.74	0.26	-0.13	0.38	NA	NA	NA	NA	1.610922145	NA	NA	68.35	67.1	-0.311226694	-0.409257826	-0.123558131	1.143768158	-0.855114761	-0.317861146	-0.864237533	-0.541861852	-1.131387569	0.629813124
FRA	2005	France	3	9	0.085	0.106	0.05	0.967	0.984	0.956	0.97	0.986	3.372	1.232	-1.367	1.768	1.463	0.955	0	0.662	0	9	0	9	9	1.48	0.4	1.67	1.42	1.37	NA	NA	NA	NA	-1.612145878	NA	NA	53.39	60.88	-1.00698164	-0.779557242	1.706565081	0.427995443	-0.598972981	0.802168213	-1.444828711	-1.311313161	-1.495537	1.048435144
FRA	2006	France	3	9	0.085	0.106	0.05	0.967	0.984	0.956	0.965	0.986	3.372	1.232	-1.367	1.753	1.461	0.955	0	0.662	0	9	0	9	9	1.3	0.6	1.63	1.47	1.46	NA	NA	NA	NA	-1.364217568	NA	NA	64.29	71.49	-0.500047889	-0.147905022	1.706565081	0.427995443	-0.598972981	0.802168213	-1.444828711	-1.311313161	-1.495537	1.048435144
FRA	2007	France	3	9	0.085	0.106	0.05	0.967	0.984	0.956	0.965	0.986	3.372	1.887	-1.367	1.818	1.528	0.955	0	0.662	0	9	0	9	9	1.26	0.56	1.47	1.47	1.46	NA	NA	NA	NA	-1.116289259	NA	NA	71.12	74.52	-0.182400411	0.032481993	1.706565081	1.088320976	-0.598972981	0.802168213	-1.444828711	-1.311313161	-1.495537	1.048435144
FRA	2008	France	3	9	0.085	0.106	0.05	0.967	0.984	0.941	0.965	0.986	3.372	1.215	-1.367	1.837	1.528	0.955	0	0.662	1	9	0	9	9	1.3	0.55	1.58	1.51	1.41	NA	NA	NA	NA	-0.868360949	NA	NA	96.99	94.32	1.020753362	1.211248623	1.706565081	0.410857223	-0.598972981	0.802168213	-1.444828711	-1.311313161	-1.495537	1.048435144
FRA	2009	France	3	9	0.085	0.106	0.05	0.967	0.984	0.941	0.975	0.986	3.372	1.215	-1.367	1.835	1.528	0.955	0	0.662	0	9	0	9	9	1.24	0.51	1.48	1.45	1.44	NA	NA	NA	NA	-0.62043264	NA	NA	61.76	64.02	-0.617712328	-0.592621524	1.706565081	0.410857223	-0.598972981	0.802168213	-1.444828711	-1.311313161	-1.495537	1.048435144
FRA	2010	France	3	9	0.086	0.099	0.053	0.967	0.981	0.942	0.972	0.986	3.372	1.218	-1.237	1.882	1.529	0.956	0	0.662	0	9	0	9	9	1.2	0.68	1.43	1.52	1.47	0.032525777	1.32E-05	3.11E-05	-0.287788011	-0.372504331	-0.26970322	-0.074498603	79.04	79.04	0.185940443	0.301574173	1.706565081	0.413881614	-0.482950572	0.802168213	-1.441529897	-1.335040734	-1.485605652	1.048435144
FRA	2011	France	3	9	0.087	0.102	0.053	0.967	0.984	0.942	0.977	0.986	3.372	1.218	-1.237	1.927	1.524	0.973	0	0.662	0	9	0	9	9	1.17	0.6	1.36	1.45	1.53	0.018014276	7.28E-06	1.65E-05	-0.28973377	-0.124576021	-0.270390258	-0.074541181	104.01	93.67	1.3472373	1.172551738	1.706565081	0.413881614	-0.482950572	0.802168213	-1.438231084	-1.324871774	-1.485605652	1.048435144
FRA	2012	France	3	9	0.087	0.102	0.053	0.967	0.986	0.933	0.977	0.989	3.372	1.904	-1.58	2.09	1.763	0.973	0	0.662	0	9	0	9	9	1.24	0.55	1.34	1.45	1.46	0.018246524	7.36E-06	1.73E-05	-0.289702629	0.123352288	-0.270381771	-0.074538804	105.01	95.27	1.393744984	1.267805608	1.706565081	1.105459196	-0.789071236	0.802168213	-1.438231084	-1.324871774	-1.485605652	1.048435144
FRA	2013	France	3	9	0.07	0.117	0.056	0.925	0.98	0.925	0.957	0.984	3.372	1.248	-0.708	1.85	1.574	0.966	0	0.866	0	9	0	9	9	1.22	0.45	1.48	1.43	1.33	0.025949323	1.04E-05	2.40E-05	-0.288669808	0.371280598	-0.270024489	-0.074519283	104.08	94.83	1.350492838	1.241610794	1.706565081	0.444125532	-0.010828615	0.802168213	-1.494310913	-1.274026974	-1.475674304	0.891451886
FRA	2014	France	3	9	0.07	0.117	0.056	0.925	0.975	0.939	0.962	0.984	3.372	1.248	-0.697	1.81	1.578	0.915	0	0.866	0	9	0	9	9	1.22	0.3	1.4	1.47	1.31	0.031019788	1.25E-05	2.85E-05	-0.28798994	0.619208907	-0.269789466	-0.074506141	96.24	88.9	0.985872599	0.888576141	1.706565081	0.444125532	-0.001011334	0.802168213	-1.494310913	-1.274026974	-1.475674304	0.891451886
FRA	2015	France	3	9	0.07	0.117	0.056	0.925	0.975	0.939	0.962	0.984	3.372	0.911	-0.697	1.812	1.571	0.915	0	0.866	0	9	0	9	9	1.21	0.11	1.44	1.41	1.31	0.055565595	2.23E-05	5.51E-05	-0.284698743	0.867137216	-0.268650895	-0.074428522	50.75	51.86	-1.129761924	-1.316550929	1.706565081	0.104385525	-0.001011334	0.802168213	-1.494310913	-1.274026974	-1.475674304	0.891451886
FRA	2016	France	3	9	0.07	0.117	0.056	0.925	0.975	0.939	0.962	0.984	3.372	0.911	-0.697	1.815	1.577	0.915	0	0.866	0	9	0	9	9	1.14	-0.1	1.41	1.41	1.4	0.097907866	3.92E-05	9.63E-05	-0.279021327	1.115065526	-0.266686296	-0.074308517	42.81	45.53	-1.499032931	-1.693399049	1.706565081	0.104385525	-0.001011334	0.802168213	-1.494310913	-1.274026974	-1.475674304	0.891451886
FRA	2017	France	3	8	0.067	0.109	0.059	0.921	0.959	0.9	0.953	0.962	2.72	0.855	-0.691	1.647	1.488	0.93	0	0.866	0	9	0	9	9	1.15	0.28	1.35	1.44	1.26	0.099341759	3.97E-05	9.56E-05	-0.278829065	1.362993835	-0.266621507	-0.074310437	52.81	54.28	-1.033956096	-1.172479452	1.239908713	0.047930212	0.004343546	0.802168213	-1.504207354	-1.301144201	-1.465742956	0.8765011
FRA	2018	France	3	8	0.114	0.115	0.053	0.921	0.944	0.902	0.94	0.967	1.24	0.608	0.443	1.582	1.497	0.855	0	0.866	1	9	0	9	9	1.18	0.11	1.48	1.44	1.32	NA	NA	NA	NA	1.610922145	NA	NA	68.35	67.1	-0.311226694	-0.409257826	0.180627385	-0.201078043	1.016415945	0.802168213	-1.349163119	-1.280806281	-1.485605652	0.8765011
FRO	2005	Faeroe Islands	NA	NA	NA	NA	NA	NA	NA	NA	NA	NA	NA	NA	NA	NA	NA	NA	NA	NA	0	NA	NA	NA	NA	NA	NA	NA	NA	NA	NA	NA	NA	NA	-1.612145878	NA	NA	53.39	60.88	-1.00698164	-0.779557242	NA	NA	NA	NA	NA	NA	NA	NA
FRO	2006	Faeroe Islands	NA	NA	NA	NA	NA	NA	NA	NA	NA	NA	NA	NA	NA	NA	NA	NA	NA	NA	0	NA	NA	NA	NA	NA	NA	NA	NA	NA	NA	NA	NA	NA	-1.364217568	NA	NA	64.29	71.49	-0.500047889	-0.147905022	NA	NA	NA	NA	NA	NA	NA	NA
FRO	2007	Faeroe Islands	NA	NA	NA	NA	NA	NA	NA	NA	NA	NA	NA	NA	NA	NA	NA	NA	NA	NA	0	NA	NA	NA	NA	NA	NA	NA	NA	NA	NA	NA	NA	NA	-1.116289259	NA	NA	71.12	74.52	-0.182400411	0.032481993	NA	NA	NA	NA	NA	NA	NA	NA
FRO	2008	Faeroe Islands	NA	NA	NA	NA	NA	NA	NA	NA	NA	NA	NA	NA	NA	NA	NA	NA	NA	NA	0	NA	NA	NA	NA	NA	NA	NA	NA	NA	NA	NA	NA	NA	-0.868360949	NA	NA	96.99	94.32	1.020753362	1.211248623	NA	NA	NA	NA	NA	NA	NA	NA
FRO	2009	Faeroe Islands	NA	NA	NA	NA	NA	NA	NA	NA	NA	NA	NA	NA	NA	NA	NA	NA	NA	NA	0	NA	NA	NA	NA	NA	NA	NA	NA	NA	NA	NA	NA	NA	-0.62043264	NA	NA	61.76	64.02	-0.617712328	-0.592621524	NA	NA	NA	NA	NA	NA	NA	NA
FRO	2010	Faeroe Islands	NA	NA	NA	NA	NA	NA	NA	NA	NA	NA	NA	NA	NA	NA	NA	NA	NA	NA	0	NA	NA	NA	NA	NA	NA	NA	NA	NA	NA	NA	NA	NA	-0.372504331	NA	NA	79.04	79.04	0.185940443	0.301574173	NA	NA	NA	NA	NA	NA	NA	NA
FRO	2011	Faeroe Islands	NA	NA	NA	NA	NA	NA	NA	NA	NA	NA	NA	NA	NA	NA	NA	NA	NA	NA	0	NA	NA	NA	NA	NA	NA	NA	NA	NA	NA	NA	NA	NA	-0.124576021	NA	NA	104.01	93.67	1.3472373	1.172551738	NA	NA	NA	NA	NA	NA	NA	NA
FRO	2012	Faeroe Islands	NA	NA	NA	NA	NA	NA	NA	NA	NA	NA	NA	NA	NA	NA	NA	NA	NA	NA	0	NA	NA	NA	NA	NA	NA	NA	NA	NA	NA	NA	NA	NA	0.123352288	NA	NA	105.01	95.27	1.393744984	1.267805608	NA	NA	NA	NA	NA	NA	NA	NA
FRO	2013	Faeroe Islands	NA	NA	NA	NA	NA	NA	NA	NA	NA	NA	NA	NA	NA	NA	NA	NA	NA	NA	0	NA	NA	NA	NA	NA	NA	NA	NA	NA	NA	NA	NA	NA	0.371280598	NA	NA	104.08	94.83	1.350492838	1.241610794	NA	NA	NA	NA	NA	NA	NA	NA
FRO	2014	Faeroe Islands	NA	NA	NA	NA	NA	NA	NA	NA	NA	NA	NA	NA	NA	NA	NA	NA	NA	NA	0	NA	NA	NA	NA	NA	NA	NA	NA	NA	NA	NA	NA	NA	0.619208907	NA	NA	96.24	88.9	0.985872599	0.888576141	NA	NA	NA	NA	NA	NA	NA	NA
FRO	2015	Faeroe Islands	NA	NA	NA	NA	NA	NA	NA	NA	NA	NA	NA	NA	NA	NA	NA	NA	NA	NA	0	NA	NA	NA	NA	NA	NA	NA	NA	NA	NA	NA	NA	NA	0.867137216	NA	NA	50.75	51.86	-1.129761924	-1.316550929	NA	NA	NA	NA	NA	NA	NA	NA
FRO	2016	Faeroe Islands	NA	NA	NA	NA	NA	NA	NA	NA	NA	NA	NA	NA	NA	NA	NA	NA	NA	NA	0	NA	NA	NA	NA	NA	NA	NA	NA	NA	NA	NA	NA	NA	1.115065526	NA	NA	42.81	45.53	-1.499032931	-1.693399049	NA	NA	NA	NA	NA	NA	NA	NA
FRO	2017	Faeroe Islands	NA	NA	NA	NA	NA	NA	NA	NA	NA	NA	NA	NA	NA	NA	NA	NA	NA	NA	0	NA	NA	NA	NA	NA	NA	NA	NA	NA	NA	NA	NA	NA	1.362993835	NA	NA	52.81	54.28	-1.033956096	-1.172479452	NA	NA	NA	NA	NA	NA	NA	NA
FRO	2018	Faeroe Islands	NA	NA	NA	NA	NA	NA	NA	NA	NA	NA	NA	NA	NA	NA	NA	NA	NA	NA	0	NA	NA	NA	NA	NA	NA	NA	NA	NA	NA	NA	NA	NA	1.610922145	NA	NA	68.35	67.1	-0.311226694	-0.409257826	NA	NA	NA	NA	NA	NA	NA	NA
FSM	2005	Micronesia Fed. Sts.	NA	NA	NA	NA	NA	NA	NA	NA	NA	NA	NA	NA	NA	NA	NA	NA	NA	NA	0	NA	NA	NA	NA	0.95	1.13	-0.1	0.66	-0.24	NA	NA	NA	NA	-1.612145878	NA	NA	53.39	60.88	-1.00698164	-0.779557242	NA	NA	NA	NA	NA	NA	NA	NA
FSM	2006	Micronesia Fed. Sts.	NA	NA	NA	NA	NA	NA	NA	NA	NA	NA	NA	NA	NA	NA	NA	NA	NA	NA	0	NA	NA	NA	NA	1.07	1.13	-0.3	0.68	-0.25	NA	NA	NA	NA	-1.364217568	NA	NA	64.29	71.49	-0.500047889	-0.147905022	NA	NA	NA	NA	NA	NA	NA	NA
FSM	2007	Micronesia Fed. Sts.	NA	NA	NA	NA	NA	NA	NA	NA	NA	NA	NA	NA	NA	NA	NA	NA	NA	NA	0	NA	NA	NA	NA	1.06	1.15	-0.73	0.62	-0.34	NA	NA	NA	NA	-1.116289259	NA	NA	71.12	74.52	-0.182400411	0.032481993	NA	NA	NA	NA	NA	NA	NA	NA
FSM	2008	Micronesia Fed. Sts.	NA	NA	NA	NA	NA	NA	NA	NA	NA	NA	NA	NA	NA	NA	NA	NA	NA	NA	0	NA	NA	NA	NA	1.09	1.17	-0.73	0.34	-0.31	NA	NA	NA	NA	-0.868360949	NA	NA	96.99	94.32	1.020753362	1.211248623	NA	NA	NA	NA	NA	NA	NA	NA
FSM	2009	Micronesia Fed. Sts.	NA	NA	NA	NA	NA	NA	NA	NA	NA	NA	NA	NA	NA	NA	NA	NA	NA	NA	0	NA	NA	NA	NA	1.07	1.29	-0.71	0.04	-0.13	NA	NA	NA	NA	-0.62043264	NA	NA	61.76	64.02	-0.617712328	-0.592621524	NA	NA	NA	NA	NA	NA	NA	NA
FSM	2010	Micronesia Fed. Sts.	NA	NA	NA	NA	NA	NA	NA	NA	NA	NA	NA	NA	NA	NA	NA	NA	NA	NA	0	NA	NA	NA	NA	1.05	1.21	-0.8	-0.1	-0.15	0	0	0	-0.292149193	-0.372504331	-0.271236208	-0.074589294	79.04	79.04	0.185940443	0.301574173	NA	NA	NA	NA	NA	NA	NA	NA
FSM	2011	Micronesia Fed. Sts.	NA	NA	NA	NA	NA	NA	NA	NA	NA	NA	NA	NA	NA	NA	NA	NA	NA	NA	0	NA	NA	NA	NA	1	1.1	-0.75	-0.06	-0.34	0	0	0	-0.292149193	-0.124576021	-0.271236208	-0.074589294	104.01	93.67	1.3472373	1.172551738	NA	NA	NA	NA	NA	NA	NA	NA
FSM	2012	Micronesia Fed. Sts.	NA	NA	NA	NA	NA	NA	NA	NA	NA	NA	NA	NA	NA	NA	NA	NA	NA	NA	0	NA	NA	NA	NA	0.98	1.15	-0.64	-0.02	-0.15	0	0	0	-0.292149193	0.123352288	-0.271236208	-0.074589294	105.01	95.27	1.393744984	1.267805608	NA	NA	NA	NA	NA	NA	NA	NA
FSM	2013	Micronesia Fed. Sts.	NA	NA	NA	NA	NA	NA	NA	NA	NA	NA	NA	NA	NA	NA	NA	NA	NA	NA	0	NA	NA	NA	NA	1	1.1	-0.57	0.07	-0.2	0	0	0	-0.292149193	0.371280598	-0.271236208	-0.074589294	104.08	94.83	1.350492838	1.241610794	NA	NA	NA	NA	NA	NA	NA	NA
FSM	2014	Micronesia Fed. Sts.	NA	NA	NA	NA	NA	NA	NA	NA	NA	NA	NA	NA	NA	NA	NA	NA	NA	NA	0	NA	NA	NA	NA	1.11	0.98	-0.5	-0.28	0.77	0	0	0	-0.292149193	0.619208907	-0.271236208	-0.074589294	96.24	88.9	0.985872599	0.888576141	NA	NA	NA	NA	NA	NA	NA	NA
FSM	2015	Micronesia Fed. Sts.	NA	NA	NA	NA	NA	NA	NA	NA	NA	NA	NA	NA	NA	NA	NA	NA	NA	NA	0	NA	NA	NA	NA	1.13	1.04	-0.4	-0.3	0.68	0	0	0	-0.292149193	0.867137216	-0.271236208	-0.074589294	50.75	51.86	-1.129761924	-1.316550929	NA	NA	NA	NA	NA	NA	NA	NA
FSM	2016	Micronesia Fed. Sts.	NA	NA	NA	NA	NA	NA	NA	NA	NA	NA	NA	NA	NA	NA	NA	NA	NA	NA	0	NA	NA	NA	NA	1.15	1.06	-0.33	-0.05	0.65	0	0	0	-0.292149193	1.115065526	-0.271236208	-0.074589294	42.81	45.53	-1.499032931	-1.693399049	NA	NA	NA	NA	NA	NA	NA	NA
FSM	2017	Micronesia Fed. Sts.	NA	NA	NA	NA	NA	NA	NA	NA	NA	NA	NA	NA	NA	NA	NA	NA	NA	NA	0	NA	NA	NA	NA	1.15	1.18	0.09	0.01	0.75	0	0	0	-0.292149193	1.362993835	-0.271236208	-0.074589294	52.81	54.28	-1.033956096	-1.172479452	NA	NA	NA	NA	NA	NA	NA	NA
FSM	2018	Micronesia Fed. Sts.	NA	NA	NA	NA	NA	NA	NA	NA	NA	NA	NA	NA	NA	NA	NA	NA	NA	NA	0	NA	NA	NA	NA	1.15	1.34	-0.15	-0.02	0.69	NA	NA	NA	NA	1.610922145	NA	NA	68.35	67.1	-0.311226694	-0.409257826	NA	NA	NA	NA	NA	NA	NA	NA
GAB	2005	Gabon	1	3	0.888	0.815	0.854	0.778	0.748	0.801	0.331	0.715	1.198	0.019	1.222	0.226	0.178	0.782	0	0.035	0	0	4	-4	-4	-0.83	0.33	-0.81	-0.45	-0.67	NA	NA	NA	NA	-1.612145878	NA	NA	53.39	60.88	-1.00698164	-0.779557242	0.150566699	-0.794866958	1.711657919	-1.277886311	1.204118537	1.091951058	1.166064294	0.342010484
GAB	2006	Gabon	1	3	0.888	0.815	0.854	0.778	0.748	0.801	0.331	0.715	1.198	0.019	1.222	0.257	0.233	0.782	0	0.035	0	0	4	-4	-4	-0.95	0.22	-0.78	-0.74	-0.97	NA	NA	NA	NA	-1.364217568	NA	NA	64.29	71.49	-0.500047889	-0.147905022	0.150566699	-0.794866958	1.711657919	-1.277886311	1.204118537	1.091951058	1.166064294	0.342010484
GAB	2007	Gabon	1	3	0.888	0.815	0.854	0.778	0.748	0.801	0.331	0.715	1.198	0.019	1.74	0.256	0.229	0.787	0	0.035	0	0	4	-4	-4	-0.87	0.3	-0.79	-0.7	-1.06	NA	NA	NA	NA	-1.116289259	NA	NA	71.12	74.52	-0.182400411	0.032481993	0.150566699	-0.794866958	2.173962595	-1.277886311	1.204118537	1.091951058	1.166064294	0.342010484
GAB	2008	Gabon	1	3	0.888	0.815	0.854	0.778	0.748	0.801	0.331	0.715	1.198	0.019	1.74	0.263	0.233	0.787	0	0.035	0	0	4	-4	-4	-0.85	0.26	-0.82	-0.63	-1.08	NA	NA	NA	NA	-0.868360949	NA	NA	96.99	94.32	1.020753362	1.211248623	0.150566699	-0.794866958	2.173962595	-1.277886311	1.204118537	1.091951058	1.166064294	0.342010484
GAB	2009	Gabon	1	3	0.888	0.815	0.854	0.778	0.742	0.801	0.331	0.703	1.198	0.019	1.74	0.293	0.234	0.787	0	0.035	0	4	1	3	3	-0.97	0.14	-0.74	-0.55	-1	NA	NA	NA	NA	-0.62043264	NA	NA	61.76	64.02	-0.617712328	-0.592621524	0.150566699	-0.794866958	2.173962595	-0.157856952	1.204118537	1.091951058	1.166064294	0.342010484
GAB	2010	Gabon	1	3	0.88	0.815	0.821	0.858	0.801	0.78	0.326	0.791	1.452	0.019	1.74	0.428	0.303	0.844	0	0.035	0	4	1	3	3	-0.87	0.3	-0.77	-0.52	-0.87	0.000869747	1.32E-06	1.39E-06	-0.292032574	-0.372504331	-0.271083169	-0.074585241	79.04	79.04	0.185940443	0.301574173	0.332362278	-0.794866958	2.173962595	-0.157856952	1.177728028	1.091951058	1.056819465	0.641026213
GAB	2011	Gabon	1	3	0.88	0.815	0.821	0.858	0.801	0.78	0.326	0.791	1.452	0.019	1.74	0.436	0.318	0.844	0	0.035	0	4	1	3	3	-0.91	0.38	-0.8	-0.46	-0.89	0.011478625	1.63E-05	1.41E-05	-0.290610095	-0.124576021	-0.269345378	-0.074548217	104.01	93.67	1.3472373	1.172551738	0.332362278	-0.794866958	2.173962595	-0.157856952	1.177728028	1.091951058	1.056819465	0.641026213
GAB	2012	Gabon	1	3	0.885	0.78	0.857	0.822	0.753	0.783	0.29	0.766	0.987	0.019	0.891	0.415	0.345	0.763	0	-0.796	0	4	1	3	3	-0.86	0.29	-0.9	-0.47	-0.7	0.01238846	1.66E-05	1.64E-05	-0.290488101	0.123352288	-0.269307661	-0.074541374	105.01	95.27	1.393744984	1.267805608	-0.000452463	-0.794866958	1.416247016	-0.157856952	1.194222096	0.973313191	1.175995642	0.506469135
GAB	2013	Gabon	1	4	0.782	0.659	0.629	0.9	0.836	0.872	0.489	0.87	1.498	0.019	1.545	0.491	0.273	0.866	0	0.078	0	4	1	3	3	-0.86	0.33	-0.83	-0.54	-0.66	0.014253032	1.80E-05	1.85E-05	-0.290238092	0.371280598	-0.269151532	-0.074535447	104.08	94.83	1.350492838	1.241610794	0.365285887	-0.794866958	1.999928982	-0.157856952	0.854444305	0.563165137	0.421213186	0.798009471
GAB	2014	Gabon	1	4	0.782	0.659	0.629	0.9	0.836	0.872	0.489	0.87	1.498	0.019	1.545	0.491	0.271	0.866	0	0.078	0	4	1	3	3	-0.87	0.15	-0.64	-0.51	-0.69	0.008007842	9.61E-06	9.84E-06	-0.291075471	0.619208907	-0.270119802	-0.074560602	96.24	88.9	0.985872599	0.888576141	0.365285887	-0.794866958	1.999928982	-0.157856952	0.854444305	0.563165137	0.421213186	0.798009471
GAB	2015	Gabon	1	4	0.782	0.659	0.629	0.9	0.836	0.872	0.489	0.87	1.498	0.019	1.545	0.487	0.272	0.866	0	0.078	0	4	1	3	3	-0.89	0.02	-0.73	-0.55	-0.71	0.001331177	1.54E-06	2.12E-06	-0.291970704	0.867137216	-0.271056867	-0.074583111	50.75	51.86	-1.129761924	-1.316550929	0.365285887	-0.794866958	1.999928982	-0.157856952	0.854444305	0.563165137	0.421213186	0.798009471
GAB	2016	Gabon	1	4	0.782	0.659	0.629	0.9	0.836	0.872	0.489	0.87	1.498	0.019	1.842	0.498	0.297	0.866	0	0.078	0	4	1	3	3	-0.97	-0.1	-0.79	-0.6	-0.75	0.001155107	1.27E-06	1.92E-06	-0.291994312	1.115065526	-0.271088796	-0.074583707	42.81	45.53	-1.499032931	-1.693399049	0.365285887	-0.794866958	2.264995562	-0.157856952	0.854444305	0.563165137	0.421213186	0.798009471
GAB	2017	Gabon	1	3	0.824	0.756	0.699	0.849	0.854	0.897	0.419	0.861	1.499	0.019	1.613	0.552	0.316	0.889	0	-0.61	0	4	1	3	3	-1.06	-0.1	-0.93	-0.68	-0.82	0.001150802	1.20E-06	1.74E-06	-0.291994889	1.362993835	-0.271096704	-0.074584216	52.81	54.28	-1.033956096	-1.172479452	0.366001617	-0.794866958	2.060617626	-0.157856952	0.992994472	0.891961511	0.652944641	0.607386944
GAB	2018	Gabon	1	3	0.811	0.755	0.661	0.849	0.834	0.81	0.395	0.814	1.499	0.019	1.613	0.38	0.199	0.898	0	-0.61	0	4	1	3	3	-0.95	-0.25	-0.81	-0.71	-0.85	NA	NA	NA	NA	1.610922145	NA	NA	68.35	67.1	-0.311226694	-0.409257826	0.366001617	-0.794866958	2.060617626	-0.157856952	0.950109896	0.888571858	0.527147565	0.607386944
GBR	2005	United Kingdom	3	9	0.049	0.028	0.031	0.968	0.972	0.894	0.979	0.974	2.178	0.98	-1.183	1.886	1.639	0.932	0	1.453	0	10	0	10	10	1.44	0.13	1.77	1.57	1.9	NA	NA	NA	NA	-1.612145878	NA	NA	53.39	60.88	-1.00698164	-0.779557242	0.851982713	0.173946535	-0.434756648	0.962172408	-1.563585997	-1.575706122	-1.558435538	1.052172841
GBR	2006	United Kingdom	3	9	0.049	0.028	0.031	0.968	0.972	0.894	0.979	0.976	2.178	0.98	-1.183	1.895	1.641	0.932	0	1.453	0	10	0	10	10	1.38	0.67	1.67	1.79	1.79	NA	NA	NA	NA	-1.364217568	NA	NA	64.29	71.49	-0.500047889	-0.147905022	0.851982713	0.173946535	-0.434756648	0.962172408	-1.563585997	-1.575706122	-1.558435538	1.052172841
GBR	2007	United Kingdom	3	9	0.049	0.028	0.031	0.968	0.972	0.894	0.979	0.976	2.178	0.98	-1.183	1.892	1.636	0.932	0	1.453	0	10	0	10	10	1.34	0.58	1.65	1.74	1.74	NA	NA	NA	NA	-1.116289259	NA	NA	71.12	74.52	-0.182400411	0.032481993	0.851982713	0.173946535	-0.434756648	0.962172408	-1.563585997	-1.575706122	-1.558435538	1.052172841
GBR	2008	United Kingdom	3	9	0.049	0.028	0.031	0.968	0.972	0.894	0.98	0.976	2.178	0.98	-1.183	1.903	1.636	0.932	0	1.453	0	10	0	10	10	1.32	0.49	1.64	1.71	1.68	NA	NA	NA	NA	-0.868360949	NA	NA	96.99	94.32	1.020753362	1.211248623	0.851982713	0.173946535	-0.434756648	0.962172408	-1.563585997	-1.575706122	-1.558435538	1.052172841
GBR	2009	United Kingdom	3	9	0.049	0.028	0.031	0.968	0.972	0.894	0.98	0.976	2.178	0.98	-1.183	1.896	1.638	0.932	0	1.453	0	10	0	10	10	1.3	0.12	1.51	1.74	1.63	NA	NA	NA	NA	-0.62043264	NA	NA	61.76	64.02	-0.617712328	-0.592621524	0.851982713	0.173946535	-0.434756648	0.962172408	-1.563585997	-1.575706122	-1.558435538	1.052172841
GBR	2010	United Kingdom	3	9	0.049	0.028	0.031	0.97	0.969	0.892	0.979	0.974	2.178	0.98	-1.183	2.032	1.888	0.932	0	1.453	0	10	0	10	10	1.29	0.41	1.57	1.76	1.6	0.030903335	1.28E-05	3.03E-05	-0.288005555	-0.372504331	-0.269751365	-0.074500844	79.04	79.04	0.185940443	0.301574173	0.851982713	0.173946535	-0.434756648	0.962172408	-1.563585997	-1.575706122	-1.558435538	1.059648234
GBR	2011	United Kingdom	3	9	0.049	0.028	0.031	0.969	0.969	0.892	0.979	0.974	2.178	0.98	-1.183	2.03	1.891	0.932	0	1.453	0	10	0	10	10	1.3	0.35	1.56	1.65	1.62	0	0	0	-0.292149193	-0.124576021	-0.271236208	-0.074589294	104.01	93.67	1.3472373	1.172551738	0.851982713	0.173946535	-0.434756648	0.962172408	-1.563585997	-1.575706122	-1.558435538	1.055910537
GBR	2012	United Kingdom	3	9	0.049	0.028	0.031	0.976	0.986	0.946	0.991	0.989	2.552	0.98	-1.487	2.175	1.888	0.96	0	1.453	0	10	0	10	10	1.34	0.4	1.55	1.72	1.67	0.01701496	6.99E-06	1.61E-05	-0.289867762	0.123352288	-0.270424384	-0.07454239	105.01	95.27	1.393744984	1.267805608	1.119665967	0.173946535	-0.706070589	0.962172408	-1.563585997	-1.575706122	-1.558435538	1.082074413
GBR	2013	United Kingdom	3	9	0.064	0.053	0.033	0.94	0.956	0.834	0.974	0.958	2.396	0.98	-1.055	1.841	1.739	0.927	0	2.22	0	10	0	10	10	1.33	0.49	1.5	1.71	1.7	0.03079587	1.26E-05	2.86E-05	-0.288019964	0.371280598	-0.269770477	-0.074505898	104.08	94.83	1.350492838	1.241610794	1.00801199	0.173946535	-0.320519199	0.962172408	-1.514103794	-1.490964788	-1.551814639	0.947517335
GBR	2014	United Kingdom	3	9	0.064	0.053	0.033	0.94	0.955	0.85	0.97	0.957	2.396	0.98	-1.055	1.855	1.773	0.924	0	2.22	0	10	0	10	10	1.28	0.42	1.63	1.89	1.74	0.043689323	1.78E-05	3.03E-05	-0.28629116	0.619208907	-0.269169517	-0.074500807	96.24	88.9	0.985872599	0.888576141	1.00801199	0.173946535	-0.320519199	0.962172408	-1.514103794	-1.490964788	-1.551814639	0.947517335
GBR	2015	United Kingdom	3	9	0.064	0.053	0.033	0.94	0.953	0.845	0.97	0.948	2.399	0.98	-1.055	1.674	1.436	0.934	0	2.22	0	10	0	10	10	1.3	0.52	1.74	1.81	1.88	0.003294657	1.34E-06	2.98E-06	-0.291707433	0.867137216	-0.271081115	-0.074580606	50.75	51.86	-1.129761924	-1.316550929	1.010159181	0.173946535	-0.320519199	0.962172408	-1.514103794	-1.490964788	-1.551814639	0.947517335
GBR	2016	United Kingdom	3	9	0.064	0.053	0.033	0.94	0.951	0.85	0.97	0.944	2.403	0.98	-1.055	1.68	1.438	0.946	0	2.22	0	8	0	8	8	1.29	0.36	1.6	1.69	1.9	0.011646786	4.70E-06	1.10E-05	-0.290587547	1.115065526	-0.270690159	-0.074557127	42.81	45.53	-1.499032931	-1.693399049	1.013022104	0.173946535	-0.320519199	0.642164019	-1.514103794	-1.490964788	-1.551814639	0.947517335
GBR	2017	United Kingdom	3	9	0.046	0.047	0.024	0.938	0.948	0.856	0.978	0.958	2.174	0.98	-0.911	1.701	1.513	0.923	0	2.12	0	8	0	8	8	1.33	0.33	1.41	1.68	1.84	0.011782512	4.74E-06	1.12E-05	-0.290569349	1.362993835	-0.270686238	-0.074556628	52.81	54.28	-1.033956096	-1.172479452	0.84911979	0.173946535	-0.192002069	0.642164019	-1.573482438	-1.511302708	-1.581608683	0.940041942
GBR	2018	United Kingdom	3	9	0.045	0.036	0.024	0.936	0.955	0.854	0.976	0.961	2.205	0.98	-0.923	1.72	1.534	0.93	0	2.265	0	8	0	8	8	1.38	0.05	1.34	1.64	1.83	NA	NA	NA	NA	1.610922145	NA	NA	68.35	67.1	-0.311226694	-0.409257826	0.87130744	0.173946535	-0.20271183	0.642164019	-1.576781251	-1.548588895	-1.581608683	0.932566549
GEO	2005	Georgia	2	6	0.217	0.246	0.125	0.662	0.871	0.882	0.759	0.789	2.197	1.638	0.613	0.899	0.783	0.904	1	0.531	0	7	0	7	7	-0.09	-0.75	-0.43	-0.71	-0.22	NA	NA	NA	NA	-1.612145878	NA	NA	53.39	60.88	-1.00698164	-0.779557242	0.865581595	0.83729646	1.168137557	0.482159825	-1.009385328	-0.836761693	-1.247253297	-0.091562322
GEO	2006	Georgia	2	5	0.188	0.252	0.083	0.663	0.867	0.884	0.794	0.783	2.197	1.638	0.613	0.896	0.787	0.887	1	0.531	0	7	0	7	7	-0.09	-0.96	-0.24	-0.46	0.04	NA	NA	NA	NA	-1.364217568	NA	NA	64.29	71.49	-0.500047889	-0.147905022	0.865581595	0.83729646	1.168137557	0.482159825	-1.105050919	-0.816423773	-1.386292171	-0.087824626
GEO	2007	Georgia	2	5	0.169	0.245	0.064	0.664	0.868	0.864	0.789	0.776	1.984	1.638	0.671	0.866	0.789	0.865	1	0.545	0	7	1	6	6	-0.23	-0.64	0.11	-0.35	-0.13	NA	NA	NA	NA	-1.116289259	NA	NA	71.12	74.52	-0.182400411	0.032481993	0.713130971	0.83729646	1.219901401	0.322155631	-1.167728376	-0.840151346	-1.449190709	-0.084086929
GEO	2008	Georgia	2	5	0.14	0.26	0.054	0.633	0.848	0.876	0.799	0.776	2.062	1.123	0.68	0.799	0.678	0.878	0.94	0.535	0	7	1	6	6	-0.26	-0.92	0.3	-0.27	-0.11	NA	NA	NA	NA	-0.868360949	NA	NA	96.99	94.32	1.020753362	1.211248623	0.76895796	0.318109209	1.227933722	0.322155631	-1.263393968	-0.789306546	-1.482295202	-0.199955524
GEO	2009	Georgia	2	6	0.136	0.252	0.049	0.609	0.843	0.817	0.807	0.771	2.371	0.907	0.627	0.802	0.676	0.888	0.88	0.535	0	7	1	6	6	-0.19	-0.97	0.29	-0.2	-0.12	NA	NA	NA	NA	-0.62043264	NA	NA	61.76	64.02	-0.617712328	-0.592621524	0.990118724	0.100353002	1.180632278	0.322155631	-1.276589222	-0.816423773	-1.498847449	-0.289660243
GEO	2010	Georgia	2	5	0.144	0.254	0.049	0.604	0.852	0.872	0.792	0.762	2.371	0.783	0.592	0.828	0.699	0.888	0.82	0.543	0	7	1	6	6	-0.16	-0.72	0.31	-0.21	0.01	0	0	0	-0.292149193	-0.372504331	-0.271236208	-0.074589294	79.04	79.04	0.185940443	0.301574173	0.990118724	-0.02465519	1.149395475	0.322155631	-1.250198714	-0.809644466	-1.498847449	-0.308348726
GEO	2011	Georgia	2	5	0.144	0.252	0.049	0.604	0.859	0.872	0.802	0.755	2.371	0.783	0.592	0.832	0.7	0.888	0.76	0.543	0	7	1	6	6	-0.17	-0.66	0.55	-0.12	0.12	0	0	0	-0.292149193	-0.124576021	-0.271236208	-0.074589294	104.01	93.67	1.3472373	1.172551738	0.990118724	-0.02465519	1.149395475	0.322155631	-1.250198714	-0.816423773	-1.498847449	-0.308348726
GEO	2012	Georgia	2	6	0.183	0.286	0.079	0.715	0.837	0.849	0.791	0.771	2.382	0.783	0.236	0.913	0.878	0.887	0.7	0.526	0	7	1	6	6	0.02	-0.68	0.61	-0.01	0.4	0	0	0	-0.292149193	0.123352288	-0.271236208	-0.074589294	105.01	95.27	1.393744984	1.267805608	0.997991761	-0.02465519	0.831672571	0.322155631	-1.121544987	-0.701175559	-1.399533968	0.106535598
GEO	2013	Georgia	2	6	0.138	0.257	0.081	0.78	0.92	0.869	0.827	0.925	2.265	1.658	0.07	1.129	0.891	0.893	0.64	0.881	0	8	1	7	7	0.14	-0.44	0.59	-0.01	0.47	0	0	0	-0.292149193	0.371280598	-0.271236208	-0.074589294	104.08	94.83	1.350492838	1.241610794	0.914251277	0.857459072	0.683520879	0.482159825	-1.269991595	-0.799475506	-1.392913069	0.349485878
GEO	2014	Georgia	2	6	0.148	0.272	0.116	0.779	0.91	0.879	0.808	0.933	1.69	1.647	0.07	1.141	0.89	0.845	0.58	0.927	0	8	1	7	7	0.28	-0.32	0.49	0.19	0.79	0	0	0	-0.292149193	0.619208907	-0.271236208	-0.074589294	96.24	88.9	0.985872599	0.888576141	0.502706167	0.846369636	0.683520879	0.482159825	-1.23700346	-0.748630706	-1.277047341	0.345748181
GEO	2015	Georgia	2	6	0.153	0.266	0.129	0.881	0.919	0.905	0.817	0.928	2.162	1.647	0.311	1.167	0.887	0.903	0.52	1.033	0	8	1	7	7	0.27	-0.47	0.4	0.27	0.68	0	0	0	-0.292149193	0.867137216	-0.271236208	-0.074589294	50.75	51.86	-1.129761924	-1.316550929	0.840531023	0.846369636	0.898608576	0.482159825	-1.220509392	-0.768968626	-1.2340115	0.726993235
GEO	2016	Georgia	2	6	0.177	0.244	0.131	0.866	0.922	0.881	0.798	0.937	2.346	1.473	0.072	1.21	1.021	0.85	0.46	1.026	0	8	1	7	7	0.29	-0.31	0.52	0.38	0.69	0	0	0	-0.292149193	1.115065526	-0.271236208	-0.074589294	42.81	45.53	-1.499032931	-1.693399049	0.972225458	0.670954914	0.685305839	0.482159825	-1.141337868	-0.843541	-1.227390601	0.670927786
GEO	2017	Georgia	2	6	0.18	0.248	0.141	0.836	0.934	0.878	0.796	0.925	2.476	1.144	0.056	1.24	1.024	0.928	0.4	1.127	0	8	1	7	7	0.26	-0.37	0.58	0.33	0.74	0	0	0	-0.292149193	1.362993835	-0.271236208	-0.074589294	52.81	54.28	-1.033956096	-1.172479452	1.06527044	0.339279951	0.671026158	0.482159825	-1.131441427	-0.829982386	-1.194286107	0.558796888
GEO	2018	Georgia	2	7	0.154	0.247	0.179	0.845	0.915	0.875	0.806	0.908	1.677	1.144	-0.035	1.187	0.901	0.896	0.34	1.116	0	8	1	7	7	0.25	-0.43	0.61	0.33	0.71	NA	NA	NA	NA	1.610922145	NA	NA	68.35	67.1	-0.311226694	-0.409257826	0.493401669	0.339279951	0.589810472	0.482159825	-1.217210579	-0.83337204	-1.068489031	0.592436157
GHA	2005	Ghana	3	8	0.643	0.563	0.632	0.953	0.915	0.923	0.675	0.911	2.628	1.752	-1.254	1.4	1.157	0.912	0	NA	0	8	0	8	8	0.2	0.17	-0.19	-0.12	-0.37	NA	NA	NA	NA	-1.612145878	NA	NA	53.39	60.88	-1.00698164	-0.779557242	1.174061495	0.952223347	-0.498122733	0.642164019	0.395909227	0.237758416	0.431144534	0.996107391
GHA	2006	Ghana	3	8	0.643	0.563	0.632	0.953	0.915	0.923	0.68	0.911	2.628	1.752	-1.254	1.407	1.158	0.912	0	NA	0	8	0	8	8	0.41	0.01	0.16	0.05	-0.02	NA	NA	NA	NA	-1.364217568	NA	NA	64.29	71.49	-0.500047889	-0.147905022	1.174061495	0.952223347	-0.498122733	0.642164019	0.395909227	0.237758416	0.431144534	0.996107391
GHA	2007	Ghana	3	8	0.643	0.563	0.632	0.953	0.918	0.923	0.673	0.909	2.628	1.752	-1.254	1.398	1.153	0.912	0	NA	0	8	0	8	8	0.5	-0.07	0.13	0.04	0.04	NA	NA	NA	NA	-1.116289259	NA	NA	71.12	74.52	-0.182400411	0.032481993	1.174061495	0.952223347	-0.498122733	0.642164019	0.395909227	0.237758416	0.431144534	0.996107391
GHA	2008	Ghana	3	8	0.643	0.563	0.632	0.953	0.918	0.923	0.634	0.909	2.628	1.752	-1.254	1.404	1.179	0.912	0	NA	0	8	0	8	8	0.43	-0.03	0.03	-0.07	-0.07	NA	NA	NA	NA	-0.868360949	NA	NA	96.99	94.32	1.020753362	1.211248623	1.174061495	0.952223347	-0.498122733	0.642164019	0.395909227	0.237758416	0.431144534	0.996107391
GHA	2009	Ghana	3	9	0.643	0.563	0.632	0.957	0.914	0.911	0.664	0.914	2.628	1.752	-1.254	1.415	1.182	0.912	0	NA	0	8	0	8	8	0.5	0.03	-0.05	-0.04	-0.01	NA	NA	NA	NA	-0.62043264	NA	NA	61.76	64.02	-0.617712328	-0.592621524	1.174061495	0.952223347	-0.498122733	0.642164019	0.395909227	0.237758416	0.431144534	1.011058178
GHA	2010	Ghana	3	9	0.643	0.563	0.632	0.957	0.933	0.925	0.68	0.931	2.628	1.752	-0.726	1.455	1.184	0.912	0	NA	0	8	0	8	8	0.51	0.03	-0.04	-0.03	0.01	1.548043386	0.001389626	0.000957948	-0.084581538	-0.372504331	-0.109856236	-0.071795426	79.04	79.04	0.185940443	0.301574173	1.174061495	0.952223347	-0.026893256	0.642164019	0.395909227	0.237758416	0.431144534	1.011058178
GHA	2011	Ghana	3	8	0.643	0.563	0.632	0.957	0.933	0.928	0.677	0.931	2.628	1.752	-0.726	1.451	1.183	0.912	0	NA	0	8	0	8	8	0.48	0.17	-0.05	0	-0.03	2.394446196	0.002107787	0.001352031	0.028907431	-0.124576021	-0.026454789	-0.070646077	104.01	93.67	1.3472373	1.172551738	1.174061495	0.952223347	-0.026893256	0.642164019	0.395909227	0.237758416	0.431144534	1.011058178
GHA	2012	Ghana	3	8	0.634	0.563	0.632	0.921	0.936	0.92	0.637	0.919	2.808	1.752	-0.726	1.385	1.159	0.939	0	NA	0	8	0	8	8	0.43	0.13	-0.05	0.01	-0.13	1.88660203	0.001632009	0.000998202	-0.039186283	0.123352288	-0.081707867	-0.071678023	105.01	95.27	1.393744984	1.267805608	1.302893008	0.952223347	-0.026893256	0.642164019	0.366219905	0.237758416	0.431144534	0.8765011
GHA	2013	Ghana	3	8	0.603	0.627	0.654	0.942	0.93	0.898	0.617	0.913	2.546	1.752	-1.306	1.298	1.058	0.946	0	NA	0	8	0	8	8	0.44	0.06	-0.1	0.15	-0.1	0.874809342	0.000740736	0.000366336	-0.174851367	0.371280598	-0.185213084	-0.073520871	104.08	94.83	1.350492838	1.241610794	1.115371584	0.952223347	-0.544531697	0.642164019	0.263956687	0.45469623	0.50397442	0.954992729
GHA	2014	Ghana	3	8	0.603	0.627	0.654	0.942	0.92	0.898	0.617	0.889	2.546	1.752	-1.306	1.29	1.063	0.946	0	NA	0	8	0	8	8	0.46	-0.11	-0.28	0.05	-0.19	0.601344572	0.000496979	0.000272966	-0.211518583	0.619208907	-0.213521072	-0.073793184	96.24	88.9	0.985872599	0.888576141	1.115371584	0.952223347	-0.544531697	0.642164019	0.263956687	0.45469623	0.50397442	0.954992729
GHA	2015	Ghana	2	6	0.616	0.613	0.676	0.933	0.914	0.884	0.591	0.877	2.546	1.752	-1.306	1.26	1.006	0.951	0	NA	0	8	0	8	8	0.49	-0.03	-0.22	0.14	-0.19	0	0	0	-0.292149193	0.867137216	-0.271236208	-0.074589294	50.75	51.86	-1.129761924	-1.316550929	1.115371584	0.952223347	-0.544531697	0.642164019	0.306841262	0.407241083	0.576804306	0.921353459
GHA	2016	Ghana	2	7	0.646	0.642	0.691	0.932	0.918	0.901	0.587	0.909	2.338	1.752	-2.07	1.253	1.052	0.946	0	NA	0	8	0	8	8	0.58	-0.13	-0.17	0.05	-0.15	0.022750223	1.78E-05	1.02E-05	-0.289098755	1.115065526	-0.269167275	-0.074559526	42.81	45.53	-1.499032931	-1.693399049	0.966499613	0.952223347	-1.22638647	0.642164019	0.405805668	0.50554103	0.626461047	0.917615763
GHA	2017	Ghana	3	8	0.635	0.633	0.69	0.93	0.913	0.914	0.647	0.891	2.247	1.752	-2.059	1.23	1.059	0.924	0	NA	0	8	0	8	8	0.6	0.09	-0.11	0.13	-0.23	0	0	0	-0.292149193	1.362993835	-0.271236208	-0.074589294	52.81	54.28	-1.033956096	-1.172479452	0.901368126	0.952223347	-1.216569189	0.642164019	0.369518719	0.47503415	0.623150597	0.910140369
GHA	2018	Ghana	3	8	0.63	0.627	0.691	0.929	0.91	0.902	0.617	0.876	2.239	1.752	-2.055	1.25	1.075	0.909	0	NA	0	8	0	8	8	0.58	0.03	-0.21	0.07	-0.11	NA	NA	NA	NA	1.610922145	NA	NA	68.35	67.1	-0.311226694	-0.409257826	0.895642281	0.952223347	-1.212999269	0.642164019	0.353024651	0.45469623	0.626461047	0.906402673
GIN	2005	Guinea	1	3	0.9	0.942	0.928	0.293	0.579	0.651	0.092	0.6	0.265	-0.822	1.507	-0.193	-0.068	0.58	0	-1.206	0	1	2	-1	-1	-1.17	-1.16	-1.05	-1.37	-1.05	NA	NA	NA	NA	-1.612145878	NA	NA	53.39	60.88	-1.00698164	-0.779557242	-0.517209976	-1.64270478	1.966014739	-0.797873729	1.243704299	1.522437033	1.411037547	-1.470772372
GIN	2006	Guinea	1	3	0.9	0.942	0.928	0.294	0.569	0.651	0.092	0.6	0.265	-0.822	1.507	-0.156	-0.068	0.58	0	-1.206	0	1	2	-1	-1	-1.23	-1.91	-1.3	-1.4	-1.12	NA	NA	NA	NA	-1.364217568	NA	NA	64.29	71.49	-0.500047889	-0.147905022	-0.517209976	-1.64270478	1.966014739	-0.797873729	1.243704299	1.522437033	1.411037547	-1.467034675
GIN	2007	Guinea	1	3	0.897	0.942	0.928	0.294	0.569	0.651	0.092	0.6	0.265	-0.822	1.596	-0.139	-0.072	0.58	0	-0.216	0	1	2	-1	-1	-1.37	-2.4	-1.25	-1.44	-1.28	NA	NA	NA	NA	-1.116289259	NA	NA	71.12	74.52	-0.182400411	0.032481993	-0.517209976	-1.64270478	2.045445465	-0.797873729	1.233807858	1.522437033	1.411037547	-1.467034675
GIN	2008	Guinea	1	3	0.95	0.943	0.928	0.235	0.568	0.602	0.074	0.599	0.399	-0.822	2.143	-0.219	-0.076	0.617	0	-1.193	1	1	2	-1	-1	-1.43	-2.1	-1.17	-1.53	-1.2	NA	NA	NA	NA	-0.868360949	NA	NA	96.99	94.32	1.020753362	1.211248623	-0.421302072	-1.64270478	2.533632063	-0.797873729	1.408644974	1.525826686	1.411037547	-1.687558775
GIN	2009	Guinea	0	0	0.929	0.918	0.898	0.201	0.525	0.581	0.079	0.529	0.395	-0.822	2.383	-0.194	-0.789	0.526	0	-0.985	0	1	2	-1	-1	-1.3	-2.12	-1.02	-1.54	-1.08	NA	NA	NA	NA	-0.62043264	NA	NA	61.76	64.02	-0.617712328	-0.592621524	-0.424164995	-1.64270478	2.74782728	-0.797873729	1.33936989	1.441085353	1.311724066	-1.81464046
GIN	2010	Guinea	1	3	0.911	0.867	0.897	0.556	0.544	0.744	0.14	0.524	0.88	0.318	0.905	0.267	0.468	0.647	0	-0.249	0	3	2	1	1	-0.92	-1.69	-1.11	-1.48	-1.2	0	0	0	-0.292149193	-0.372504331	-0.271236208	-0.074589294	79.04	79.04	0.185940443	0.301574173	-0.077035641	-0.493435913	1.428741737	-0.47786534	1.279991247	1.268213032	1.308413617	-0.487758163
GIN	2011	Guinea	1	3	0.81	0.675	0.781	0.501	0.703	0.71	0.199	0.706	0.88	0.318	0.416	0.304	0.468	0.605	0	-0.249	0	3	2	1	1	-0.89	-1.39	-1.12	-1.45	-1.1	0	0	0	-0.292149193	-0.124576021	-0.271236208	-0.074589294	104.01	93.67	1.3472373	1.172551738	-0.077035641	-0.493435913	0.992318983	-0.47786534	0.946811083	0.61739959	0.92440149	-0.693331477
GIN	2012	Guinea	1	3	0.793	0.621	0.781	0.501	0.736	0.71	0.227	0.696	0.88	0.318	0.337	0.301	0.467	0.605	0	-0.249	0	3	2	1	1	-1.01	-1.29	-1.27	-1.41	-1.04	0	0	0	-0.292149193	0.123352288	-0.271236208	-0.074589294	105.01	95.27	1.393744984	1.267805608	-0.077035641	-0.493435913	0.921813058	-0.47786534	0.890731253	0.43435831	0.92440149	-0.693331477
GIN	2013	Guinea	1	3	0.814	0.78	0.731	0.584	0.728	0.674	0.197	0.71	0.968	0.318	-0.766	0.337	0.52	0.732	0	-1.214	0	4	0	4	4	-1.02	-1.23	-1.17	-1.38	-1.04	0	0	0	-0.292149193	0.371280598	-0.271236208	-0.074589294	104.08	94.83	1.350492838	1.241610794	-0.014051345	-0.493435913	-0.062592459	0.002147242	0.960006337	0.973313191	0.758879021	-0.383102658
GIN	2014	Guinea	1	4	0.83	0.777	0.729	0.584	0.758	0.674	0.223	0.732	0.968	0.318	-0.766	0.264	0.518	0.691	0	-1.218	0	4	0	4	4	-0.86	-0.96	-1.23	-1.36	-1.06	0	0	0	-0.292149193	0.619208907	-0.271236208	-0.074589294	96.24	88.9	0.985872599	0.888576141	-0.014051345	-0.493435913	-0.062592459	0.002147242	1.012787353	0.963144231	0.752258123	-0.383102658
GIN	2015	Guinea	1	4	0.826	0.78	0.729	0.587	0.774	0.686	0.229	0.711	0.808	0.318	-0.766	0.241	0.471	0.664	0	-1.218	0	4	0	4	4	-0.86	-0.39	-1.15	-1.16	-0.99	0	0	0	-0.292149193	0.867137216	-0.271236208	-0.074589294	50.75	51.86	-1.129761924	-1.316550929	-0.128568246	-0.493435913	-0.062592459	0.002147242	0.999592099	0.973313191	0.752258123	-0.371889568
GIN	2016	Guinea	1	4	0.825	0.779	0.729	0.591	0.75	0.713	0.195	0.753	0.948	0.318	-0.766	0.255	0.47	0.718	0	-1.218	0	4	0	4	4	-0.76	-0.39	-1.01	-1.22	-0.92	0	0	0	-0.292149193	1.115065526	-0.271236208	-0.074589294	42.81	45.53	-1.499032931	-1.693399049	-0.028365958	-0.493435913	-0.062592459	0.002147242	0.996293286	0.969923538	0.752258123	-0.356938782
GIN	2017	Guinea	1	3	0.828	0.785	0.701	0.517	0.706	0.699	0.183	0.682	0.66	0.318	-0.93	0.202	0.449	0.716	0	-1.003	0	4	0	4	4	-0.74	-0.7	-1.04	-1.23	-1.01	0	0	0	-0.292149193	1.362993835	-0.271236208	-0.074589294	52.81	54.28	-1.033956096	-1.172479452	-0.234496378	-0.493435913	-0.20895919	0.002147242	1.006189726	0.990261458	0.65956554	-0.633528331
GIN	2018	Guinea	1	3	0.816	0.801	0.759	0.426	0.676	0.684	0.153	0.532	0.917	0.318	-0.551	0.141	0.39	0.764	0	-0.536	0	4	0	4	4	-0.75	-0.88	-0.97	-1.21	-1.04	NA	NA	NA	NA	1.610922145	NA	NA	68.35	67.1	-0.311226694	-0.409257826	-0.050553607	-0.493435913	0.129290756	0.002147242	0.966603964	1.044495912	0.851571604	-0.973658723
GMB	2005	Gambia	1	3	0.647	0.724	0.645	0.223	0.388	0.692	0.293	0.262	-0.527	0.904	-0.971	-0.148	0.385	0.392	0	NA	0	0	5	-5	-5	-1.02	0.2	-0.72	-0.38	-0.71	NA	NA	NA	NA	-1.612145878	NA	NA	53.39	60.88	-1.00698164	-0.779557242	-1.084068632	0.09732861	-0.245550873	-1.437890505	0.409104481	0.783492604	0.474180375	-1.732411135
GMB	2006	Gambia	1	3	0.647	0.724	0.645	0.196	0.373	0.692	0.293	0.234	-0.527	0.904	-0.971	-0.219	0.253	0.392	0	NA	0	0	5	-5	-5	-0.9	-0.03	-0.68	-0.36	-0.72	NA	NA	NA	NA	-1.364217568	NA	NA	64.29	71.49	-0.500047889	-0.147905022	-1.084068632	0.09732861	-0.245550873	-1.437890505	0.409104481	0.783492604	0.474180375	-1.833328943
GMB	2007	Gambia	1	3	0.647	0.724	0.645	0.222	0.394	0.692	0.293	0.234	-0.527	0.904	-0.971	-0.216	0.265	0.392	0	NA	0	0	5	-5	-5	-0.89	0.05	-0.57	-0.31	-0.73	NA	NA	NA	NA	-1.116289259	NA	NA	71.12	74.52	-0.182400411	0.032481993	-1.084068632	0.09732861	-0.245550873	-1.437890505	0.409104481	0.783492604	0.474180375	-1.736148831
GMB	2008	Gambia	1	3	0.647	0.724	0.645	0.222	0.394	0.672	0.282	0.234	-0.527	0.904	-0.971	-0.217	0.261	0.392	0	NA	0	0	5	-5	-5	-0.87	0.07	-0.72	-0.41	-0.74	NA	NA	NA	NA	-0.868360949	NA	NA	96.99	94.32	1.020753362	1.211248623	-1.084068632	0.09732861	-0.245550873	-1.437890505	0.409104481	0.783492604	0.474180375	-1.736148831
GMB	2009	Gambia	1	3	0.647	0.724	0.645	0.222	0.394	0.672	0.282	0.234	-0.527	0.904	-0.971	-0.22	0.257	0.392	0	NA	0	0	5	-5	-5	-1.01	0.12	-0.67	-0.51	-0.57	NA	NA	NA	NA	-0.62043264	NA	NA	61.76	64.02	-0.617712328	-0.592621524	-1.084068632	0.09732861	-0.245550873	-1.437890505	0.409104481	0.783492604	0.474180375	-1.736148831
GMB	2010	Gambia	1	3	0.68	0.724	0.645	0.222	0.394	0.672	0.282	0.234	-0.527	0.904	-0.971	-0.208	0.261	0.392	0	NA	0	0	5	-5	-5	-1.08	0.07	-0.68	-0.56	-0.59	0	0	0	-0.292149193	-0.372504331	-0.271236208	-0.074589294	79.04	79.04	0.185940443	0.301574173	-1.084068632	0.09732861	-0.245550873	-1.437890505	0.517965327	0.783492604	0.474180375	-1.736148831
GMB	2011	Gambia	1	3	0.68	0.724	0.645	0.222	0.394	0.672	0.282	0.234	-0.527	0.904	-0.971	-0.217	0.265	0.392	0	NA	0	0	5	-5	-5	-1.22	0	-0.61	-0.54	-0.51	0	0	0	-0.292149193	-0.124576021	-0.271236208	-0.074589294	104.01	93.67	1.3472373	1.172551738	-1.084068632	0.09732861	-0.245550873	-1.437890505	0.517965327	0.783492604	0.474180375	-1.736148831
GMB	2012	Gambia	1	3	0.68	0.724	0.645	0.222	0.363	0.647	0.282	0.226	-0.527	0.904	-0.971	-0.234	0.256	0.392	0	NA	0	0	5	-5	-5	-1.29	0	-0.51	-0.58	-0.64	0	0	0	-0.292149193	0.123352288	-0.271236208	-0.074589294	105.01	95.27	1.393744984	1.267805608	-1.084068632	0.09732861	-0.245550873	-1.437890505	0.517965327	0.783492604	0.474180375	-1.736148831
GMB	2013	Gambia	1	3	0.665	0.768	0.739	0.143	0.304	0.631	0.236	0.153	-0.338	0.904	-0.807	-0.26	0.289	0.342	0	NA	0	0	5	-5	-5	-1.26	-0.05	-0.71	-0.64	-0.7	0	0	0	-0.292149193	0.371280598	-0.271236208	-0.074589294	104.08	94.83	1.350492838	1.241610794	-0.948795544	0.09732861	-0.099184142	-1.437890505	0.468483124	0.932637351	0.785362616	-2.031426864
GMB	2014	Gambia	1	3	0.665	0.768	0.739	0.163	0.3	0.631	0.219	0.153	-0.162	0.729	-0.807	-0.246	0.292	0.381	0	NA	0	0	5	-5	-5	-1.27	-0.15	-0.67	-0.69	-0.69	0	0	0	-0.292149193	0.619208907	-0.271236208	-0.074589294	96.24	88.9	0.985872599	0.888576141	-0.822826954	-0.079094242	-0.099184142	-1.437890505	0.468483124	0.932637351	0.785362616	-1.956672931
GMB	2015	Gambia	1	3	0.665	0.768	0.739	0.169	0.336	0.627	0.248	0.154	-0.162	0.729	-0.807	-0.251	0.291	0.381	0	NA	0	0	5	-5	-5	-1.46	0.02	-0.9	-0.72	-0.77	0	0	0	-0.292149193	0.867137216	-0.271236208	-0.074589294	50.75	51.86	-1.129761924	-1.316550929	-0.822826954	-0.079094242	-0.099184142	-1.437890505	0.468483124	0.932637351	0.785362616	-1.934246752
GMB	2016	Gambia	1	3	0.645	0.737	0.689	0.165	0.315	0.608	0.275	0.139	-0.076	0.68	-0.663	-0.152	0.411	0.382	0	NA	0	0	5	-5	-5	-1.26	-0.43	-0.84	-0.77	-0.81	0	0	0	-0.292149193	1.115065526	-0.271236208	-0.074589294	42.81	45.53	-1.499032931	-1.693399049	-0.76127412	-0.128492641	0.029332988	-1.437890505	0.402506854	0.827558098	0.619840148	-1.949197538
GMB	2017	Gambia	1	3	0.267	0.286	0.284	0.816	0.456	0.745	0.358	0.335	1.288	1.597	-1.101	0.733	0.691	0.806	0	NA	0	4	0	4	4	-0.62	-0.08	-0.65	-0.43	-0.63	0	0	0	-0.292149193	1.362993835	-0.271236208	-0.074589294	52.81	54.28	-1.033956096	-1.172479452	0.214982455	0.795963106	-0.361573282	0.002147242	-0.844444652	-0.701175559	-0.720891847	0.484042956
GMB	2018	Gambia	2	5	0.293	0.286	0.292	0.888	0.865	0.902	0.835	0.848	1.444	1.653	-1.236	0.818	0.762	0.86	0	NA	0	4	0	4	4	-0.2	-0.03	-0.62	-0.43	-0.46	NA	NA	NA	NA	1.610922145	NA	NA	68.35	67.1	-0.311226694	-0.409257826	0.326636433	0.852418419	-0.482058092	0.002147242	-0.758675501	-0.701175559	-0.694408252	0.753157112
GNB	2005	Guinea-Bissau	1	4	0.91	0.884	0.919	0.419	0.675	0.656	0.263	0.622	0.996	0.288	-1.01	0.446	0.723	0.685	0	1.005	0	6	0	6	6	-0.48	-0.56	-1.36	-1.25	-1.15	NA	NA	NA	NA	-1.612145878	NA	NA	53.39	60.88	-1.00698164	-0.779557242	0.005989112	-0.52367983	-0.280357596	0.322155631	1.276692434	1.325837139	1.381243503	-0.999822599
GNB	2006	Guinea-Bissau	2	5	0.915	0.899	0.919	0.423	0.696	0.631	0.226	0.636	0.996	0.288	-1.01	0.436	0.719	0.706	0	1.005	0	6	0	6	6	-0.63	-0.5	-1.1	-1.25	-1.09	NA	NA	NA	NA	-1.364217568	NA	NA	64.29	71.49	-0.500047889	-0.147905022	0.005989112	-0.52367983	-0.280357596	0.322155631	1.293186501	1.376681939	1.381243503	-0.984871812
GNB	2007	Guinea-Bissau	2	5	0.913	0.899	0.914	0.423	0.696	0.682	0.21	0.636	0.996	0.288	-1.01	0.437	0.722	0.706	0	1.005	0	6	0	6	6	-0.71	-0.46	-1.08	-1.31	-1.19	NA	NA	NA	NA	-1.116289259	NA	NA	71.12	74.52	-0.182400411	0.032481993	0.005989112	-0.52367983	-0.280357596	0.322155631	1.286588874	1.376681939	1.364691256	-0.984871812
GNB	2008	Guinea-Bissau	1	3	0.901	0.88	0.914	0.418	0.654	0.645	0.23	0.604	0.996	0.288	-1.01	0.425	0.75	0.706	0	1.005	0	6	0	6	6	-0.72	-0.71	-1.04	-1.39	-1.18	NA	NA	NA	NA	-0.868360949	NA	NA	96.99	94.32	1.020753362	1.211248623	0.005989112	-0.52367983	-0.280357596	0.322155631	1.247003112	1.312278526	1.364691256	-1.003560296
GNB	2009	Guinea-Bissau	2	5	0.908	0.88	0.914	0.388	0.663	0.683	0.253	0.613	1.006	0.288	-1.01	0.449	0.768	0.657	0	1.005	0	7	1	6	6	-0.76	-0.67	-1.03	-1.34	-1.2	NA	NA	NA	NA	-0.62043264	NA	NA	61.76	64.02	-0.617712328	-0.592621524	0.013146418	-0.52367983	-0.280357596	0.322155631	1.270094807	1.312278526	1.364691256	-1.115691194
GNB	2010	Guinea-Bissau	1	4	0.907	0.88	0.914	0.425	0.663	0.665	0.251	0.599	1.006	0.288	-0.893	0.424	0.73	0.657	0	1.013	0	7	1	6	6	-0.82	-0.69	-1.03	-1.33	-1.16	0	0	0	-0.292149193	-0.372504331	-0.271236208	-0.074589294	79.04	79.04	0.185940443	0.301574173	0.013146418	-0.52367983	-0.175937428	0.322155631	1.266795993	1.312278526	1.364691256	-0.977396419
GNB	2011	Guinea-Bissau	1	4	0.91	0.88	0.919	0.424	0.68	0.671	0.227	0.59	1.006	0.288	-0.893	0.409	0.729	0.657	0	1.013	0	7	1	6	6	-0.85	-0.75	-1.03	-1.31	-1.16	0	0	0	-0.292149193	-0.124576021	-0.271236208	-0.074589294	104.01	93.67	1.3472373	1.172551738	0.013146418	-0.52367983	-0.175937428	0.322155631	1.276692434	1.312278526	1.381243503	-0.981134116
GNB	2012	Guinea-Bissau	1	3	0.921	0.95	0.924	0.359	0.654	0.684	0.231	0.582	0.901	0.288	-0.893	0.212	0.491	0.713	0	0.658	0	2	1	1	1	-1.33	-0.97	-1.23	-1.52	-1.28	0	0	0	-0.292149193	0.123352288	-0.271236208	-0.074589294	105.01	95.27	1.393744984	1.267805608	-0.062005297	-0.52367983	-0.175937428	-0.47786534	1.312979382	1.549554259	1.39779575	-1.224084396
GNB	2013	Guinea-Bissau	0	0	0.886	0.875	0.903	0.414	0.735	0.768	0.281	0.683	1.131	0.288	-0.863	0.253	-0.692	0.741	0	0.591	0	2	1	1	1	-1.34	-0.9	-1.43	-1.59	-1.33	0	0	0	-0.292149193	0.371280598	-0.271236208	-0.074589294	104.08	94.83	1.350492838	1.241610794	0.102612747	-0.52367983	-0.149163026	-0.47786534	1.19752091	1.295330259	1.328276313	-1.018511082
GNB	2014	Guinea-Bissau	1	4	0.868	0.811	0.903	0.414	0.732	0.78	0.276	0.676	1.131	0.288	-0.863	0.539	0.797	0.741	0	0.713	0	7	1	6	6	-0.85	-0.71	-1.58	-1.33	-1.54	0	0	0	-0.292149193	0.619208907	-0.271236208	-0.074589294	96.24	88.9	0.985872599	0.888576141	0.102612747	-0.52367983	-0.149163026	0.322155631	1.138142266	1.078392445	1.328276313	-1.018511082
GNB	2015	Guinea-Bissau	2	6	0.868	0.811	0.903	0.437	0.752	0.759	0.282	0.697	1.131	0.288	-0.863	0.531	0.794	0.741	0	0.713	0	7	1	6	6	-0.75	-0.52	-1.61	-1.28	-1.48	0	0	0	-0.292149193	0.867137216	-0.271236208	-0.074589294	50.75	51.86	-1.129761924	-1.316550929	0.102612747	-0.52367983	-0.149163026	0.322155631	1.138142266	1.078392445	1.328276313	-0.93254406
GNB	2016	Guinea-Bissau	2	5	0.885	0.872	0.903	0.466	0.735	0.745	0.267	0.684	1.131	0.288	-0.863	0.526	0.796	0.741	0	0.713	0	7	1	6	6	-0.73	-0.44	-1.64	-1.49	-1.55	0	0	0	-0.292149193	1.115065526	-0.271236208	-0.074589294	42.81	45.53	-1.499032931	-1.693399049	0.102612747	-0.52367983	-0.149163026	0.322155631	1.194222096	1.285161299	1.328276313	-0.824150858
GNB	2017	Guinea-Bissau	2	5	0.879	0.9	0.874	0.472	0.691	0.721	0.232	0.636	1.131	0.288	-0.863	0.487	0.833	0.711	0	0.754	0	7	1	6	6	-0.8	-0.5	-1.77	-1.44	-1.56	0	0	0	-0.292149193	1.362993835	-0.271236208	-0.074589294	52.81	54.28	-1.033956096	-1.172479452	0.102612747	-0.52367983	-0.149163026	0.322155631	1.174429215	1.380071592	1.232273281	-0.801724679
GNB	2018	Guinea-Bissau	1	4	0.877	0.867	0.893	0.482	0.695	0.731	0.261	0.607	0.859	0.288	-1.464	0.561	0.856	0.689	0	0.993	0	7	1	6	6	-0.67	-0.67	-1.49	-1.23	-1.53	NA	NA	NA	NA	1.610922145	NA	NA	68.35	67.1	-0.311226694	-0.409257826	-0.092065984	-0.52367983	-0.685543548	0.322155631	1.167831588	1.268213032	1.295171819	-0.764347712
GNQ	2005	Equatorial Guinea	1	3	0.897	0.957	0.847	0.141	0.178	0.311	0.048	0.154	-1.41	-0.583	-1.108	-0.756	-0.274	0.231	0	NA	0	0	6	-6	-6	-1.68	-0.39	-1.43	-1.46	-1.61	NA	NA	NA	NA	-1.612145878	NA	NA	53.39	60.88	-1.00698164	-0.779557242	-1.716058776	-1.40176157	-0.367820643	-1.597894699	1.233807858	1.573281833	1.142891148	-2.038902257
GNQ	2006	Equatorial Guinea	1	3	0.897	0.957	0.847	0.139	0.184	0.304	0.057	0.165	-1.403	-0.583	-1.122	-0.761	-0.271	0.226	0	NA	0	0	6	-6	-6	-1.83	0.17	-1.58	-1.37	-1.59	NA	NA	NA	NA	-1.364217568	NA	NA	64.29	71.49	-0.500047889	-0.147905022	-1.711048661	-1.40176157	-0.380315364	-1.597894699	1.233807858	1.573281833	1.142891148	-2.04637765
GNQ	2007	Equatorial Guinea	1	3	0.897	0.957	0.847	0.139	0.193	0.299	0.055	0.164	-1.403	-0.583	-1.122	-0.762	-0.27	0.226	0	NA	0	0	6	-6	-6	-1.89	0.26	-1.67	-1.3	-1.5	NA	NA	NA	NA	-1.116289259	NA	NA	71.12	74.52	-0.182400411	0.032481993	-1.711048661	-1.40176157	-0.380315364	-1.597894699	1.233807858	1.573281833	1.142891148	-2.04637765
GNQ	2008	Equatorial Guinea	1	3	0.897	0.957	0.847	0.14	0.173	0.314	0.057	0.162	-1.403	-0.583	-1.122	-0.814	-0.369	0.218	0	NA	0	0	6	-6	-6	-1.89	0.2	-1.67	-1.27	-1.47	NA	NA	NA	NA	-0.868360949	NA	NA	96.99	94.32	1.020753362	1.211248623	-1.711048661	-1.40176157	-0.380315364	-1.597894699	1.233807858	1.573281833	1.142891148	-2.042639953
GNQ	2009	Equatorial Guinea	1	3	0.897	0.957	0.847	0.114	0.201	0.294	0.052	0.187	-1.403	-0.583	-1.122	-0.808	-0.367	0.218	0	NA	0	0	6	-6	-6	-1.81	0.37	-1.7	-1.27	-1.47	NA	NA	NA	NA	-0.62043264	NA	NA	61.76	64.02	-0.617712328	-0.592621524	-1.711048661	-1.40176157	-0.380315364	-1.597894699	1.233807858	1.573281833	1.142891148	-2.139820065
GNQ	2010	Equatorial Guinea	1	3	0.897	0.957	0.847	0.099	0.192	0.304	0.051	0.158	-1.536	-0.583	-0.927	-0.839	-0.368	0.174	0	NA	0	0	6	-6	-6	-1.86	0.24	-1.68	-1.3	-1.47	0.003221646	1.10E-06	4.49E-06	-0.291717223	-0.372504331	-0.271109037	-0.074576207	79.04	79.04	0.185940443	0.301574173	-1.806240835	-1.40176157	-0.20628175	-1.597894699	1.233807858	1.573281833	1.142891148	-2.195885514
GNQ	2011	Equatorial Guinea	1	3	0.897	0.957	0.847	0.079	0.172	0.268	0.05	0.161	-1.521	-0.583	-0.927	-0.852	-0.364	0.213	0	NA	0	0	6	-6	-6	-1.9	0.15	-1.63	-1.27	-1.46	0.007087448	2.35E-06	6.10E-06	-0.291198881	-0.124576021	-0.270963394	-0.074571489	104.01	93.67	1.3472373	1.172551738	-1.795504875	-1.40176157	-0.20628175	-1.597894699	1.233807858	1.573281833	1.142891148	-2.270639447
GNQ	2012	Equatorial Guinea	1	3	0.897	0.957	0.847	0.083	0.189	0.292	0.05	0.152	-1.521	-0.583	-0.687	-0.838	-0.363	0.201	0	NA	0	0	6	-6	-6	-1.91	0.23	-1.61	-1.3	-1.52	0.009778945	0.000143808	8.17E-06	-0.290837995	0.123352288	-0.254535504	-0.074565467	105.01	95.27	1.393744984	1.267805608	-1.795504875	-1.40176157	0.007913466	-1.597894699	1.233807858	1.573281833	1.142891148	-2.25568866
GNQ	2013	Equatorial Guinea	1	3	0.897	0.957	0.847	0.092	0.181	0.275	0.042	0.142	-1.53	-0.583	-0.687	-0.795	-0.344	0.197	0	NA	0	0	6	-6	-6	-1.97	0.12	-1.54	-1.35	-1.59	0.006476412	3.66E-05	5.48E-06	-0.291280811	0.371280598	-0.266986952	-0.0745733	104.08	94.83	1.350492838	1.241610794	-1.801946451	-1.40176157	0.007913466	-1.597894699	1.233807858	1.573281833	1.142891148	-2.222049391
GNQ	2014	Equatorial Guinea	1	3	0.897	0.957	0.847	0.092	0.187	0.257	0.047	0.161	-1.197	-0.583	-0.691	-0.781	-0.346	0.199	0	NA	0	0	6	-6	-6	-1.98	-0.37	-1.5	-1.45	-1.77	0.006294346	2.28E-05	5.35E-06	-0.291305223	0.619208907	-0.268587749	-0.074573697	96.24	88.9	0.985872599	0.888576141	-1.563608152	-1.40176157	0.004343546	-1.597894699	1.233807858	1.573281833	1.142891148	-2.222049391
GNQ	2015	Equatorial Guinea	1	3	0.897	0.957	0.847	0.092	0.182	0.28	0.03	0.145	-1.197	-0.583	-0.702	-0.806	-0.345	0.211	0	NA	0	0	6	-6	-6	-2	-0.21	-1.42	-1.46	-1.77	0	0	0	-0.292149193	0.867137216	-0.271236208	-0.074589294	50.75	51.86	-1.129761924	-1.316550929	-1.563608152	-1.40176157	-0.005473735	-1.597894699	1.233807858	1.573281833	1.142891148	-2.222049391
GNQ	2016	Equatorial Guinea	1	3	0.897	0.957	0.847	0.115	0.172	0.297	0.038	0.141	-1.184	-0.583	-0.694	-0.808	-0.365	0.231	0	NA	0	0	6	-6	-6	-1.95	-0.14	-1.41	-1.52	-1.81	0	0	0	-0.292149193	1.115065526	-0.271236208	-0.074589294	42.81	45.53	-1.499032931	-1.693399049	-1.554303654	-1.40176157	0.001666106	-1.597894699	1.233807858	1.573281833	1.142891148	-2.136082369
GNQ	2017	Equatorial Guinea	1	3	0.894	0.954	0.85	0.117	0.162	0.308	0.038	0.11	-1.258	-0.583	-0.785	-0.851	-0.37	0.211	0	NA	0	0	6	-6	-6	-1.97	-0.17	-1.44	-1.49	-1.83	0	0	0	-0.292149193	1.362993835	-0.271236208	-0.074589294	52.81	54.28	-1.033956096	-1.172479452	-1.607267721	-1.40176157	-0.07954958	-1.597894699	1.223911418	1.563112873	1.152822496	-2.128606975
GNQ	2018	Equatorial Guinea	1	3	0.893	0.945	0.833	0.131	0.176	0.301	0.042	0.148	-1.44	-0.583	-0.785	-0.853	-0.372	0.197	0	NA	0	0	6	-6	-6	-1.86	-0.05	-1.29	-1.42	-1.56	NA	NA	NA	NA	1.610922145	NA	NA	68.35	67.1	-0.311226694	-0.409257826	-1.737530695	-1.40176157	-0.07954958	-1.597894699	1.220612604	1.532605993	1.096544857	-2.076279223
GRC	2005	Greece	3	9	0.489	0.449	0.423	0.961	0.973	0.937	0.82	0.978	2.882	1.604	-1.332	1.711	1.487	0.918	0	1.301	0	10	0	10	10	1.1	0.51	0.72	0.79	0.36	NA	NA	NA	NA	-1.612145878	NA	NA	53.39	60.88	-1.00698164	-0.779557242	1.355857074	0.80302002	-0.567736178	0.962172408	-0.112108053	-0.148662065	-0.260739385	1.026008964
GRC	2006	Greece	3	9	0.491	0.449	0.423	0.961	0.968	0.937	0.811	0.972	2.882	1.604	-1.332	1.714	1.488	0.918	0	1.301	0	10	0	10	10	0.97	0.63	0.64	0.87	0.36	NA	NA	NA	NA	-1.364217568	NA	NA	64.29	71.49	-0.500047889	-0.147905022	1.355857074	0.80302002	-0.567736178	0.962172408	-0.105510426	-0.148662065	-0.260739385	1.026008964
GRC	2007	Greece	3	9	0.491	0.449	0.423	0.961	0.968	0.92	0.81	0.972	2.882	1.604	-1.332	1.734	1.509	0.918	0	1.301	0	10	0	10	10	0.98	0.52	0.56	0.87	0.27	NA	NA	NA	NA	-1.116289259	NA	NA	71.12	74.52	-0.182400411	0.032481993	1.355857074	0.80302002	-0.567736178	0.962172408	-0.105510426	-0.148662065	-0.260739385	1.026008964
GRC	2008	Greece	3	9	0.491	0.449	0.423	0.961	0.971	0.938	0.81	0.971	2.882	1.604	-1.332	1.735	1.503	0.918	0	1.301	0	10	0	10	10	0.93	0.27	0.59	0.86	0.13	NA	NA	NA	NA	-0.868360949	NA	NA	96.99	94.32	1.020753362	1.211248623	1.355857074	0.80302002	-0.567736178	0.962172408	-0.105510426	-0.148662065	-0.260739385	1.026008964
GRC	2009	Greece	3	9	0.486	0.433	0.423	0.961	0.968	0.938	0.816	0.973	2.882	1.604	-1.332	1.738	1.505	0.918	0	1.301	0	10	0	10	10	0.89	-0.21	0.62	0.65	0.07	NA	NA	NA	NA	-0.62043264	NA	NA	61.76	64.02	-0.617712328	-0.592621524	1.355857074	0.80302002	-0.567736178	0.962172408	-0.122004494	-0.202896518	-0.260739385	1.026008964
GRC	2010	Greece	3	9	0.483	0.422	0.423	0.937	0.969	0.929	0.822	0.981	2.24	1.604	-0.28	1.744	1.505	0.92	0	1.301	0	10	0	10	10	0.9	-0.13	0.56	0.63	-0.06	0.000207902	8.00E-07	1.87E-07	-0.292121317	-0.372504331	-0.271143346	-0.074588749	79.04	79.04	0.185940443	0.301574173	0.896358012	0.80302002	0.371152855	0.962172408	-0.131900934	-0.240182705	-0.260739385	0.936304246
GRC	2011	Greece	3	9	0.458	0.374	0.389	0.937	0.968	0.929	0.827	0.973	2.24	1.604	0.015	1.743	1.501	0.92	0	1.301	0	10	0	10	10	0.82	-0.1	0.51	0.57	-0.1	0.001071829	4.17E-06	9.79E-07	-0.292005478	-0.124576021	-0.270751875	-0.074586439	104.01	93.67	1.3472373	1.172551738	0.896358012	0.80302002	0.634434475	0.962172408	-0.214371272	-0.402886065	-0.373294663	0.936304246
GRC	2012	Greece	3	9	0.442	0.374	0.389	0.937	0.961	0.929	0.818	0.953	2.24	1.604	0.015	1.643	1.342	0.92	0	1.301	0	10	0	10	10	0.7	-0.22	0.32	0.43	-0.19	0.000780695	3.17E-06	7.69E-07	-0.292044515	0.123352288	-0.270867657	-0.07458705	105.01	95.27	1.393744984	1.267805608	0.896358012	0.80302002	0.634434475	0.962172408	-0.267152288	-0.402886065	-0.373294663	0.936304246
GRC	2013	Greece	3	9	0.283	0.284	0.284	0.961	0.952	0.925	0.849	0.961	2.611	1.604	-0.423	1.604	1.397	0.931	0	0.577	1	10	0	10	10	0.69	-0.17	0.46	0.47	-0.05	0.001584696	6.83E-06	1.58E-06	-0.291936711	0.371280598	-0.270442959	-0.074584672	104.08	94.83	1.350492838	1.241610794	1.161894074	0.80302002	0.243528205	0.962172408	-0.791663636	-0.707954866	-0.720891847	1.026008964
GRC	2014	Greece	3	9	0.283	0.284	0.284	0.961	0.957	0.912	0.848	0.962	2.611	1.604	-0.423	1.617	1.395	0.931	0	0.577	0	10	0	10	10	0.62	-0.14	0.4	0.36	-0.12	0.000480185	2.19E-06	4.83E-07	-0.292084808	0.619208907	-0.270981574	-0.074587885	96.24	88.9	0.985872599	0.888576141	1.161894074	0.80302002	0.243528205	0.962172408	-0.791663636	-0.707954866	-0.720891847	1.026008964
GRC	2015	Greece	3	8	0.285	0.285	0.284	0.961	0.941	0.928	0.849	0.937	2.611	1.604	-0.422	1.605	1.512	0.931	0	0.577	0	10	0	10	10	0.65	-0.23	0.26	0.27	-0.08	0.000481823	2.54E-06	1.60E-06	-0.292084589	0.867137216	-0.270941708	-0.07458464	50.75	51.86	-1.129761924	-1.316550929	1.161894074	0.80302002	0.244420685	0.962172408	-0.785066009	-0.704565213	-0.720891847	1.026008964
GRC	2016	Greece	3	8	0.285	0.285	0.284	0.961	0.939	0.932	0.832	0.939	2.611	1.604	-0.422	1.602	1.515	0.931	0	0.577	0	10	0	10	10	0.67	-0.12	0.23	0.11	-0.09	0.000483956	2.70E-06	1.62E-06	-0.292084303	1.115065526	-0.270922226	-0.074584573	42.81	45.53	-1.499032931	-1.693399049	1.161894074	0.80302002	0.244420685	0.962172408	-0.785066009	-0.704565213	-0.720891847	1.026008964
GRC	2017	Greece	3	8	0.291	0.285	0.284	0.962	0.925	0.898	0.823	0.893	2.611	1.604	-0.673	1.572	1.524	0.931	0	0.577	0	10	0	10	10	0.71	-0.07	0.31	0.08	-0.14	0.000491204	2.82E-06	5.42E-07	-0.292083331	1.362993835	-0.270908366	-0.074587712	52.81	54.28	-1.033956096	-1.172479452	1.161894074	0.80302002	0.020408187	0.962172408	-0.765273128	-0.704565213	-0.720891847	1.029746661
GRC	2018	Greece	2	6	0.375	0.285	0.288	0.944	0.922	0.853	0.803	0.865	2.447	1.604	-0.673	1.553	1.52	0.917	0	0.937	0	10	0	10	10	0.86	0.09	0.34	0.15	-0.07	NA	NA	NA	NA	1.610922145	NA	NA	68.35	67.1	-0.311226694	-0.409257826	1.044514252	0.80302002	0.020408187	0.962172408	-0.488172793	-0.704565213	-0.70765005	0.962468122
GRD	2005	Grenada	NA	NA	NA	NA	NA	NA	NA	NA	NA	NA	NA	NA	NA	NA	NA	NA	NA	NA	0	NA	NA	NA	NA	0.53	0.41	0.33	0.32	0.66	NA	NA	NA	NA	-1.612145878	NA	NA	53.39	60.88	-1.00698164	-0.779557242	NA	NA	NA	NA	NA	NA	NA	NA
GRD	2006	Grenada	NA	NA	NA	NA	NA	NA	NA	NA	NA	NA	NA	NA	NA	NA	NA	NA	NA	NA	0	NA	NA	NA	NA	0.72	0.39	0.31	0.23	0.63	NA	NA	NA	NA	-1.364217568	NA	NA	64.29	71.49	-0.500047889	-0.147905022	NA	NA	NA	NA	NA	NA	NA	NA
GRD	2007	Grenada	NA	NA	NA	NA	NA	NA	NA	NA	NA	NA	NA	NA	NA	NA	NA	NA	NA	NA	0	NA	NA	NA	NA	0.79	0.38	0.23	0.15	0.38	NA	NA	NA	NA	-1.116289259	NA	NA	71.12	74.52	-0.182400411	0.032481993	NA	NA	NA	NA	NA	NA	NA	NA
GRD	2008	Grenada	NA	NA	NA	NA	NA	NA	NA	NA	NA	NA	NA	NA	NA	NA	NA	NA	NA	NA	0	NA	NA	NA	NA	0.82	0.39	0.19	0.08	0.32	NA	NA	NA	NA	-0.868360949	NA	NA	96.99	94.32	1.020753362	1.211248623	NA	NA	NA	NA	NA	NA	NA	NA
GRD	2009	Grenada	NA	NA	NA	NA	NA	NA	NA	NA	NA	NA	NA	NA	NA	NA	NA	NA	NA	NA	0	NA	NA	NA	NA	0.82	0.39	0.21	0.13	0.36	NA	NA	NA	NA	-0.62043264	NA	NA	61.76	64.02	-0.617712328	-0.592621524	NA	NA	NA	NA	NA	NA	NA	NA
GRD	2010	Grenada	NA	NA	NA	NA	NA	NA	NA	NA	NA	NA	NA	NA	NA	NA	NA	NA	NA	NA	0	NA	NA	NA	NA	0.79	0.52	0.18	0.11	0.43	0	0	0	-0.292149193	-0.372504331	-0.271236208	-0.074589294	79.04	79.04	0.185940443	0.301574173	NA	NA	NA	NA	NA	NA	NA	NA
GRD	2011	Grenada	NA	NA	NA	NA	NA	NA	NA	NA	NA	NA	NA	NA	NA	NA	NA	NA	NA	NA	0	NA	NA	NA	NA	0.79	0.36	0.23	0.14	0.42	0.003899437	2.44E-05	1.50E-06	-0.291626342	-0.124576021	-0.2684059	-0.074584906	104.01	93.67	1.3472373	1.172551738	NA	NA	NA	NA	NA	NA	NA	NA
GRD	2012	Grenada	NA	NA	NA	NA	NA	NA	NA	NA	NA	NA	NA	NA	NA	NA	NA	NA	NA	NA	0	NA	NA	NA	NA	0.75	0.49	0.27	0.13	0.42	0.003999412	2.33E-05	1.53E-06	-0.291612937	0.123352288	-0.268535862	-0.074584842	105.01	95.27	1.393744984	1.267805608	NA	NA	NA	NA	NA	NA	NA	NA
GRD	2013	Grenada	NA	NA	NA	NA	NA	NA	NA	NA	NA	NA	NA	NA	NA	NA	NA	NA	NA	NA	0	NA	NA	NA	NA	0.77	0.43	0.23	0.13	0.42	0.004213101	2.25E-05	1.56E-06	-0.291584285	0.371280598	-0.268619761	-0.074584734	104.08	94.83	1.350492838	1.241610794	NA	NA	NA	NA	NA	NA	NA	NA
GRD	2014	Grenada	NA	NA	NA	NA	NA	NA	NA	NA	NA	NA	NA	NA	NA	NA	NA	NA	NA	NA	0	NA	NA	NA	NA	0.91	0.77	-0.11	-0.17	0.25	0.004281427	1.96E-05	1.54E-06	-0.291575123	0.619208907	-0.268955426	-0.074584795	96.24	88.9	0.985872599	0.888576141	NA	NA	NA	NA	NA	NA	NA	NA
GRD	2015	Grenada	NA	NA	NA	NA	NA	NA	NA	NA	NA	NA	NA	NA	NA	NA	NA	NA	NA	NA	0	NA	NA	NA	NA	0.81	0.79	-0.2	0.14	0.56	0.0039625	1.72E-05	1.39E-06	-0.291617886	0.867137216	-0.269244118	-0.074585246	50.75	51.86	-1.129761924	-1.316550929	NA	NA	NA	NA	NA	NA	NA	NA
GRD	2016	Grenada	NA	NA	NA	NA	NA	NA	NA	NA	NA	NA	NA	NA	NA	NA	NA	NA	NA	NA	0	NA	NA	NA	NA	0.82	1.02	-0.18	0.57	0.56	0.004386134	1.81E-05	1.22E-05	-0.291561084	1.115065526	-0.269131372	-0.07455376	42.81	45.53	-1.499032931	-1.693399049	NA	NA	NA	NA	NA	NA	NA	NA
GRD	2017	Grenada	NA	NA	NA	NA	NA	NA	NA	NA	NA	NA	NA	NA	NA	NA	NA	NA	NA	NA	0	NA	NA	NA	NA	0.74	1.01	-0.18	0.44	0.48	0.004487272	1.77E-05	1.10E-05	-0.291547523	1.362993835	-0.269176462	-0.074557138	52.81	54.28	-1.033956096	-1.172479452	NA	NA	NA	NA	NA	NA	NA	NA
GRD	2018	Grenada	NA	NA	NA	NA	NA	NA	NA	NA	NA	NA	NA	NA	NA	NA	NA	NA	NA	NA	0	NA	NA	NA	NA	0.53	1	-0.25	0.31	0.38	NA	NA	NA	NA	1.610922145	NA	NA	68.35	67.1	-0.311226694	-0.409257826	NA	NA	NA	NA	NA	NA	NA	NA
GRL	2005	Greenland	NA	NA	NA	NA	NA	NA	NA	NA	NA	NA	NA	NA	NA	NA	NA	NA	NA	NA	0	NA	NA	NA	NA	NA	NA	NA	NA	NA	NA	NA	NA	NA	-1.612145878	NA	NA	53.39	60.88	-1.00698164	-0.779557242	NA	NA	NA	NA	NA	NA	NA	NA
GRL	2006	Greenland	NA	NA	NA	NA	NA	NA	NA	NA	NA	NA	NA	NA	NA	NA	NA	NA	NA	NA	0	NA	NA	NA	NA	NA	NA	NA	NA	NA	NA	NA	NA	NA	-1.364217568	NA	NA	64.29	71.49	-0.500047889	-0.147905022	NA	NA	NA	NA	NA	NA	NA	NA
GRL	2007	Greenland	NA	NA	NA	NA	NA	NA	NA	NA	NA	NA	NA	NA	NA	NA	NA	NA	NA	NA	0	NA	NA	NA	NA	NA	NA	NA	NA	NA	NA	NA	NA	NA	-1.116289259	NA	NA	71.12	74.52	-0.182400411	0.032481993	NA	NA	NA	NA	NA	NA	NA	NA
GRL	2008	Greenland	NA	NA	NA	NA	NA	NA	NA	NA	NA	NA	NA	NA	NA	NA	NA	NA	NA	NA	0	NA	NA	NA	NA	NA	NA	NA	NA	NA	NA	NA	NA	NA	-0.868360949	NA	NA	96.99	94.32	1.020753362	1.211248623	NA	NA	NA	NA	NA	NA	NA	NA
GRL	2009	Greenland	NA	NA	NA	NA	NA	NA	NA	NA	NA	NA	NA	NA	NA	NA	NA	NA	NA	NA	0	NA	NA	NA	NA	1.25	1.52	1.03	1.72	1.19	NA	NA	NA	NA	-0.62043264	NA	NA	61.76	64.02	-0.617712328	-0.592621524	NA	NA	NA	NA	NA	NA	NA	NA
GRL	2010	Greenland	NA	NA	NA	NA	NA	NA	NA	NA	NA	NA	NA	NA	NA	NA	NA	NA	NA	NA	0	NA	NA	NA	NA	1.28	1.65	1.02	1.74	1.22	NA	NA	NA	NA	-0.372504331	NA	NA	79.04	79.04	0.185940443	0.301574173	NA	NA	NA	NA	NA	NA	NA	NA
GRL	2011	Greenland	NA	NA	NA	NA	NA	NA	NA	NA	NA	NA	NA	NA	NA	NA	NA	NA	NA	NA	0	NA	NA	NA	NA	1.28	1.94	1.01	1.74	1.23	NA	NA	NA	NA	-0.124576021	NA	NA	104.01	93.67	1.3472373	1.172551738	NA	NA	NA	NA	NA	NA	NA	NA
GRL	2012	Greenland	NA	NA	NA	NA	NA	NA	NA	NA	NA	NA	NA	NA	NA	NA	NA	NA	NA	NA	0	NA	NA	NA	NA	1.29	1.93	1	1.72	1.22	NA	NA	NA	NA	0.123352288	NA	NA	105.01	95.27	1.393744984	1.267805608	NA	NA	NA	NA	NA	NA	NA	NA
GRL	2013	Greenland	NA	NA	NA	NA	NA	NA	NA	NA	NA	NA	NA	NA	NA	NA	NA	NA	NA	NA	0	NA	NA	NA	NA	1.28	1.93	0.94	1.7	1.24	NA	NA	NA	NA	0.371280598	NA	NA	104.08	94.83	1.350492838	1.241610794	NA	NA	NA	NA	NA	NA	NA	NA
GRL	2014	Greenland	NA	NA	NA	NA	NA	NA	NA	NA	NA	NA	NA	NA	NA	NA	NA	NA	NA	NA	0	NA	NA	NA	NA	1.28	1.92	0.92	1.74	1.21	NA	NA	NA	NA	0.619208907	NA	NA	96.24	88.9	0.985872599	0.888576141	NA	NA	NA	NA	NA	NA	NA	NA
GRL	2015	Greenland	NA	NA	NA	NA	NA	NA	NA	NA	NA	NA	NA	NA	NA	NA	NA	NA	NA	NA	0	NA	NA	NA	NA	1.27	1.94	0.87	1.7	1.19	NA	NA	NA	NA	0.867137216	NA	NA	50.75	51.86	-1.129761924	-1.316550929	NA	NA	NA	NA	NA	NA	NA	NA
GRL	2016	Greenland	NA	NA	NA	NA	NA	NA	NA	NA	NA	NA	NA	NA	NA	NA	NA	NA	NA	NA	0	NA	NA	NA	NA	1.28	1.97	0.84	1.72	1.17	NA	NA	NA	NA	1.115065526	NA	NA	42.81	45.53	-1.499032931	-1.693399049	NA	NA	NA	NA	NA	NA	NA	NA
GRL	2017	Greenland	NA	NA	NA	NA	NA	NA	NA	NA	NA	NA	NA	NA	NA	NA	NA	NA	NA	NA	0	NA	NA	NA	NA	1.29	1.92	0.84	1.72	1.18	NA	NA	NA	NA	1.362993835	NA	NA	52.81	54.28	-1.033956096	-1.172479452	NA	NA	NA	NA	NA	NA	NA	NA
GRL	2018	Greenland	NA	NA	NA	NA	NA	NA	NA	NA	NA	NA	NA	NA	NA	NA	NA	NA	NA	NA	0	NA	NA	NA	NA	1.31	1.94	0.84	1.74	1.18	NA	NA	NA	NA	1.610922145	NA	NA	68.35	67.1	-0.311226694	-0.409257826	NA	NA	NA	NA	NA	NA	NA	NA
GTM	2005	Guatemala	2	6	0.812	0.702	0.795	0.602	0.838	0.72	0.349	0.721	1.485	-1.063	-1.048	0.856	0.792	0.835	0	NA	0	8	0	8	8	-0.36	-0.84	-0.72	-1.05	-0.67	NA	NA	NA	NA	-1.612145878	NA	NA	53.39	60.88	-1.00698164	-0.779557242	0.355981389	-1.885664251	-0.314271839	0.642164019	0.95340871	0.708920231	0.970747781	-0.315824119
GTM	2006	Guatemala	2	6	0.812	0.702	0.795	0.602	0.838	0.724	0.344	0.721	1.485	-1.063	-1.048	0.855	0.791	0.835	0	NA	0	8	0	8	8	-0.17	-0.74	-0.61	-1.09	-0.81	NA	NA	NA	NA	-1.364217568	NA	NA	64.29	71.49	-0.500047889	-0.147905022	0.355981389	-1.885664251	-0.314271839	0.642164019	0.95340871	0.708920231	0.970747781	-0.315824119
GTM	2007	Guatemala	2	6	0.812	0.702	0.795	0.602	0.812	0.724	0.325	0.736	1.485	-1.063	-1.048	0.908	0.873	0.874	0	NA	0	8	0	8	8	-0.17	-0.75	-0.55	-1.12	-0.74	NA	NA	NA	NA	-1.116289259	NA	NA	71.12	74.52	-0.182400411	0.032481993	0.355981389	-1.885664251	-0.314271839	0.642164019	0.95340871	0.708920231	0.970747781	-0.315824119
GTM	2008	Guatemala	2	6	0.803	0.692	0.773	0.607	0.826	0.724	0.34	0.746	1.485	-1.063	-1.048	0.907	0.873	0.874	0	NA	0	8	0	8	8	-0.2	-0.71	-0.56	-1.11	-0.65	NA	NA	NA	NA	-0.868360949	NA	NA	96.99	94.32	1.020753362	1.211248623	0.355981389	-1.885664251	-0.314271839	0.642164019	0.923719388	0.675023697	0.897917895	-0.297135636
GTM	2009	Guatemala	2	6	0.803	0.692	0.773	0.609	0.819	0.74	0.369	0.766	1.485	-1.063	-1.048	0.91	0.871	0.874	0	NA	0	8	0	8	8	-0.25	-0.93	-0.71	-1.02	-0.53	NA	NA	NA	NA	-0.62043264	NA	NA	61.76	64.02	-0.617712328	-0.592621524	0.355981389	-1.885664251	-0.314271839	0.642164019	0.923719388	0.675023697	0.897917895	-0.289660243
GTM	2010	Guatemala	2	6	0.803	0.692	0.773	0.609	0.829	0.738	0.38	0.736	1.503	-1.063	-1.048	0.909	0.864	0.865	0	NA	0	8	0	8	8	-0.3	-0.85	-0.7	-0.96	-0.53	0	0	0	-0.292149193	-0.372504331	-0.271236208	-0.074589294	79.04	79.04	0.185940443	0.301574173	0.36886454	-1.885664251	-0.314271839	0.642164019	0.923719388	0.675023697	0.897917895	-0.289660243
GTM	2011	Guatemala	2	6	0.803	0.692	0.773	0.609	0.829	0.738	0.388	0.736	1.503	-1.063	-1.048	0.898	0.842	0.865	0	NA	0	8	0	8	8	-0.31	-0.74	-0.7	-1.04	-0.53	0.190618781	0.00033325	9.39E-05	-0.266590289	-0.124576021	-0.232535282	-0.07431543	104.01	93.67	1.3472373	1.172551738	0.36886454	-1.885664251	-0.314271839	0.642164019	0.923719388	0.675023697	0.897917895	-0.289660243
GTM	2012	Guatemala	2	6	0.803	0.687	0.773	0.609	0.811	0.738	0.379	0.752	1.503	-1.063	-1.048	0.88	0.833	0.863	0	NA	0	8	0	8	8	-0.36	-0.63	-0.76	-1.08	-0.66	0.201553699	0.000341038	9.39E-05	-0.265124093	0.123352288	-0.231630754	-0.074315373	105.01	95.27	1.393744984	1.267805608	0.36886454	-1.885664251	-0.314271839	0.642164019	0.923719388	0.658075431	0.897917895	-0.289660243
GTM	2013	Guatemala	2	6	0.823	0.784	0.717	0.615	0.841	0.731	0.398	0.771	1.562	-1.063	-1.169	0.937	0.84	0.827	0	NA	0	8	0	8	8	-0.37	-0.67	-0.7	-1.08	-0.62	0.834483611	0.001368006	0.000378108	-0.180258397	0.371280598	-0.112367021	-0.073486537	104.08	94.83	1.350492838	1.241610794	0.411092647	-1.885664251	-0.422261927	0.642164019	0.989695659	0.986871805	0.71253273	-0.267234063
GTM	2014	Guatemala	2	6	0.823	0.784	0.717	0.611	0.844	0.783	0.39	0.722	1.562	-1.063	-1.169	0.955	0.873	0.827	0	NA	0	8	0	8	8	-0.34	-0.66	-0.73	-0.96	-0.74	0.860993416	0.001355895	0.000373695	-0.17670386	0.619208907	-0.113773469	-0.073499407	96.24	88.9	0.985872599	0.888576141	0.411092647	-1.885664251	-0.422261927	0.642164019	0.989695659	0.986871805	0.71253273	-0.28218485
GTM	2015	Guatemala	2	6	0.801	0.79	0.717	0.614	0.837	0.748	0.429	0.755	1.562	-1.063	-0.781	1.08	1.079	0.845	0	NA	0	9	1	8	8	-0.35	-0.66	-0.71	-0.95	-0.73	0.978062027	0.001477435	0.000408889	-0.161006847	0.867137216	-0.099658799	-0.073396763	50.75	51.86	-1.129761924	-1.316550929	0.411092647	-1.885664251	-0.07597966	0.642164019	0.917121761	1.007209725	0.71253273	-0.27097176
GTM	2016	Guatemala	2	6	0.76	0.738	0.602	0.629	0.843	0.75	0.475	0.786	1.562	-1.063	-1.577	1.079	1.077	0.845	0	NA	0	9	1	8	8	-0.29	-0.54	-0.61	-1.02	-0.74	0.805404693	0.001165564	0.000325811	-0.184157411	1.115065526	-0.135877	-0.073639061	42.81	45.53	-1.499032931	-1.693399049	0.411092647	-1.885664251	-0.786393795	0.642164019	0.781870407	0.830947751	0.331831053	-0.214906311
GTM	2017	Guatemala	2	6	0.788	0.783	0.659	0.654	0.851	0.8	0.49	0.77	1.695	-1.063	-1.57	1.049	1.076	0.837	0	NA	0	9	1	8	8	-0.28	-0.65	-0.64	-1.06	-0.74	0.90992231	0.001277981	0.000354607	-0.170143284	1.362993835	-0.122821816	-0.073555076	52.81	54.28	-1.033956096	-1.172479452	0.50628482	-1.885664251	-0.780146435	0.642164019	0.874237186	0.983482151	0.520526667	-0.121463895
GTM	2018	Guatemala	2	5	0.836	0.823	0.784	0.695	0.782	0.726	0.499	0.7	1.196	-1.063	-1.042	0.892	1.025	0.805	0	NA	0	9	1	8	8	-0.34	-0.54	-0.68	-1.05	-0.82	NA	NA	NA	NA	1.610922145	NA	NA	68.35	67.1	-0.311226694	-0.409257826	0.149135238	-1.885664251	-0.308916958	0.642164019	1.032580234	1.119068285	0.934332838	0.031781666
GUM	2005	Guam	NA	NA	NA	NA	NA	NA	NA	NA	NA	NA	NA	NA	NA	NA	NA	NA	NA	NA	0	NA	NA	NA	NA	0.65	0.75	0.23	1.12	0.8	NA	NA	NA	NA	-1.612145878	NA	NA	53.39	60.88	-1.00698164	-0.779557242	NA	NA	NA	NA	NA	NA	NA	NA
GUM	2006	Guam	NA	NA	NA	NA	NA	NA	NA	NA	NA	NA	NA	NA	NA	NA	NA	NA	NA	NA	0	NA	NA	NA	NA	0.55	0.7	0.25	1.08	0.78	NA	NA	NA	NA	-1.364217568	NA	NA	64.29	71.49	-0.500047889	-0.147905022	NA	NA	NA	NA	NA	NA	NA	NA
GUM	2007	Guam	NA	NA	NA	NA	NA	NA	NA	NA	NA	NA	NA	NA	NA	NA	NA	NA	NA	NA	0	NA	NA	NA	NA	0.97	0.43	0.23	1.11	0.79	NA	NA	NA	NA	-1.116289259	NA	NA	71.12	74.52	-0.182400411	0.032481993	NA	NA	NA	NA	NA	NA	NA	NA
GUM	2008	Guam	NA	NA	NA	NA	NA	NA	NA	NA	NA	NA	NA	NA	NA	NA	NA	NA	NA	NA	0	NA	NA	NA	NA	0.97	0.44	0.25	1.13	0.81	NA	NA	NA	NA	-0.868360949	NA	NA	96.99	94.32	1.020753362	1.211248623	NA	NA	NA	NA	NA	NA	NA	NA
GUM	2009	Guam	NA	NA	NA	NA	NA	NA	NA	NA	NA	NA	NA	NA	NA	NA	NA	NA	NA	NA	0	NA	NA	NA	NA	0.96	0.4	-0.02	1.13	0.84	NA	NA	NA	NA	-0.62043264	NA	NA	61.76	64.02	-0.617712328	-0.592621524	NA	NA	NA	NA	NA	NA	NA	NA
GUM	2010	Guam	NA	NA	NA	NA	NA	NA	NA	NA	NA	NA	NA	NA	NA	NA	NA	NA	NA	NA	0	NA	NA	NA	NA	0.77	0.4	-0.02	1.12	0.82	NA	NA	NA	NA	-0.372504331	NA	NA	79.04	79.04	0.185940443	0.301574173	NA	NA	NA	NA	NA	NA	NA	NA
GUM	2011	Guam	NA	NA	NA	NA	NA	NA	NA	NA	NA	NA	NA	NA	NA	NA	NA	NA	NA	NA	0	NA	NA	NA	NA	0.78	0.79	-0.02	1.1	0.8	NA	NA	NA	NA	-0.124576021	NA	NA	104.01	93.67	1.3472373	1.172551738	NA	NA	NA	NA	NA	NA	NA	NA
GUM	2012	Guam	NA	NA	NA	NA	NA	NA	NA	NA	NA	NA	NA	NA	NA	NA	NA	NA	NA	NA	0	NA	NA	NA	NA	0.8	0.78	-0.04	1.1	0.79	NA	NA	NA	NA	0.123352288	NA	NA	105.01	95.27	1.393744984	1.267805608	NA	NA	NA	NA	NA	NA	NA	NA
GUM	2013	Guam	NA	NA	NA	NA	NA	NA	NA	NA	NA	NA	NA	NA	NA	NA	NA	NA	NA	NA	0	NA	NA	NA	NA	0.78	0.8	-0.03	1.11	0.79	NA	NA	NA	NA	0.371280598	NA	NA	104.08	94.83	1.350492838	1.241610794	NA	NA	NA	NA	NA	NA	NA	NA
GUM	2014	Guam	NA	NA	NA	NA	NA	NA	NA	NA	NA	NA	NA	NA	NA	NA	NA	NA	NA	NA	0	NA	NA	NA	NA	NA	0.75	0.44	1.41	1.23	NA	NA	NA	NA	0.619208907	NA	NA	96.24	88.9	0.985872599	0.888576141	NA	NA	NA	NA	NA	NA	NA	NA
GUM	2015	Guam	NA	NA	NA	NA	NA	NA	NA	NA	NA	NA	NA	NA	NA	NA	NA	NA	NA	NA	0	NA	NA	NA	NA	NA	0.81	0.49	1.35	1.22	NA	NA	NA	NA	0.867137216	NA	NA	50.75	51.86	-1.129761924	-1.316550929	NA	NA	NA	NA	NA	NA	NA	NA
GUM	2016	Guam	NA	NA	NA	NA	NA	NA	NA	NA	NA	NA	NA	NA	NA	NA	NA	NA	NA	NA	0	NA	NA	NA	NA	NA	0.68	0.27	1.1	1.23	NA	NA	NA	NA	1.115065526	NA	NA	42.81	45.53	-1.499032931	-1.693399049	NA	NA	NA	NA	NA	NA	NA	NA
GUM	2017	Guam	NA	NA	NA	NA	NA	NA	NA	NA	NA	NA	NA	NA	NA	NA	NA	NA	NA	NA	0	NA	NA	NA	NA	NA	0.7	0.29	1.36	1.24	NA	NA	NA	NA	1.362993835	NA	NA	52.81	54.28	-1.033956096	-1.172479452	NA	NA	NA	NA	NA	NA	NA	NA
GUM	2018	Guam	NA	NA	NA	NA	NA	NA	NA	NA	NA	NA	NA	NA	NA	NA	NA	NA	NA	NA	0	NA	NA	NA	NA	NA	0.63	0.27	1.36	1.24	NA	NA	NA	NA	1.610922145	NA	NA	68.35	67.1	-0.311226694	-0.409257826	NA	NA	NA	NA	NA	NA	NA	NA
GUY	2005	Guyana	2	5	0.636	0.72	0.634	0.56	0.812	0.875	0.516	0.678	1.34	1.512	-1.563	0.765	0.93	0.887	0	NA	0	6	0	6	6	-0.23	-0.46	-0.51	-0.67	-0.56	NA	NA	NA	NA	-1.612145878	NA	NA	53.39	60.88	-1.00698164	-0.779557242	0.252200448	0.710272007	-0.773899074	0.322155631	0.372817532	0.769933991	0.437765432	-0.472807377
GUY	2006	Guyana	2	5	0.636	0.72	0.634	0.573	0.806	0.875	0.516	0.664	1.34	1.512	-1.563	0.764	0.921	0.878	0	NA	0	6	0	6	6	0.09	-0.73	-0.3	-0.56	-0.58	NA	NA	NA	NA	-1.364217568	NA	NA	64.29	71.49	-0.500047889	-0.147905022	0.252200448	0.710272007	-0.773899074	0.322155631	0.372817532	0.769933991	0.437765432	-0.424217321
GUY	2007	Guyana	2	5	0.636	0.72	0.634	0.573	0.803	0.875	0.516	0.678	1.34	1.512	-1.52	0.767	0.925	0.872	0	NA	0	6	0	6	6	0.1	-0.56	-0.04	-0.46	-0.59	NA	NA	NA	NA	-1.116289259	NA	NA	71.12	74.52	-0.182400411	0.032481993	0.252200448	0.710272007	-0.735522431	0.322155631	0.372817532	0.769933991	0.437765432	-0.424217321
GUY	2008	Guyana	2	5	0.636	0.72	0.634	0.573	0.808	0.873	0.516	0.678	1.404	1.512	-1.52	0.771	0.921	0.881	0	NA	0	6	0	6	6	0.11	-0.63	-0.19	-0.58	-0.56	NA	NA	NA	NA	-0.868360949	NA	NA	96.99	94.32	1.020753362	1.211248623	0.298007208	0.710272007	-0.735522431	0.322155631	0.372817532	0.769933991	0.437765432	-0.424217321
GUY	2009	Guyana	2	5	0.636	0.72	0.634	0.566	0.797	0.877	0.516	0.662	1.405	1.512	-1.521	0.775	0.92	0.866	0	NA	0	6	0	6	6	0.09	-0.63	-0.18	-0.56	-0.54	NA	NA	NA	NA	-0.62043264	NA	NA	61.76	64.02	-0.617712328	-0.592621524	0.298722938	0.710272007	-0.736414912	0.322155631	0.372817532	0.769933991	0.437765432	-0.450381197
GUY	2010	Guyana	2	6	0.637	0.724	0.634	0.598	0.805	0.892	0.476	0.667	1.414	1.467	-1.487	0.765	0.921	0.864	0	NA	0	6	0	6	6	0.07	-0.46	-0.11	-0.47	-0.56	0	0	0	-0.292149193	-0.372504331	-0.271236208	-0.074589294	79.04	79.04	0.185940443	0.301574173	0.305164514	0.66490613	-0.706070589	0.322155631	0.376116346	0.783492604	0.437765432	-0.330774906
GUY	2011	Guyana	2	6	0.637	0.724	0.634	0.637	0.806	0.892	0.484	0.668	1.414	1.467	-1.487	0.758	0.889	0.886	0	NA	0	6	0	6	6	0.03	-0.43	-0.08	-0.51	-0.61	0.041775111	1.58E-05	3.20E-05	-0.286547825	-0.124576021	-0.26940479	-0.074496074	104.01	93.67	1.3472373	1.172551738	0.305164514	0.66490613	-0.706070589	0.322155631	0.376116346	0.783492604	0.437765432	-0.185004738
GUY	2012	Guyana	2	5	0.637	0.724	0.634	0.637	0.823	0.887	0.495	0.666	1.414	1.467	-1.487	0.767	0.895	0.868	0	NA	0	6	0	6	6	0	-0.5	-0.11	-0.52	-0.75	0.055466523	2.09E-05	3.95E-05	-0.284712027	0.123352288	-0.268811881	-0.074473991	105.01	95.27	1.393744984	1.267805608	0.305164514	0.66490613	-0.706070589	0.322155631	0.376116346	0.783492604	0.437765432	-0.185004738
GUY	2013	Guyana	2	6	0.617	0.699	0.584	0.635	0.848	0.861	0.505	0.755	2.057	1.467	-1.763	0.877	0.956	0.912	0	NA	0	6	0	6	6	0.02	-0.46	-0.12	-0.53	-0.65	0.038843505	1.46E-05	2.72E-05	-0.286940906	0.371280598	-0.269539078	-0.074510016	104.08	94.83	1.350492838	1.241610794	0.765379307	0.66490613	-0.952395088	0.322155631	0.310140076	0.698751271	0.272242964	-0.192480131
GUY	2014	Guyana	2	5	0.617	0.699	0.584	0.635	0.836	0.861	0.505	0.718	2.081	1.467	-1.763	0.882	0.958	0.913	0	NA	0	6	0	6	6	0.16	-0.14	-0.23	-0.62	-0.74	0.039536664	1.48E-05	2.51E-05	-0.286847964	0.619208907	-0.269513976	-0.074515988	96.24	88.9	0.985872599	0.888576141	0.782556842	0.66490613	-0.952395088	0.322155631	0.310140076	0.698751271	0.272242964	-0.192480131
GUY	2015	Guyana	2	6	0.568	0.506	0.581	0.811	0.853	0.901	0.634	0.781	2.563	1.467	-1.763	0.998	0.985	0.947	0	NA	0	8	1	7	7	0.18	-0.14	-0.34	-0.53	-0.64	0.032296249	1.21E-05	2.00E-05	-0.287818787	0.867137216	-0.26983358	-0.074530898	50.75	51.86	-1.129761924	-1.316550929	1.127539004	0.66490613	-0.952395088	0.482159825	0.148498214	0.044548176	0.262311616	0.465354473
GUY	2016	Guyana	2	6	0.463	0.313	0.556	0.94	0.893	0.874	0.716	0.842	2.438	1.699	-1.59	1.026	0.998	0.894	0	NA	0	8	1	7	7	0.25	-0.03	-0.3	-0.31	-0.32	0.040485429	1.51E-05	2.42E-05	-0.28672075	1.115065526	-0.26948186	-0.0745188	42.81	45.53	-1.499032931	-1.693399049	1.038072676	0.898792426	-0.797996036	0.482159825	-0.197877205	-0.609654919	0.179550382	0.947517335
GUY	2017	Guyana	2	6	0.482	0.328	0.582	0.933	0.901	0.856	0.68	0.853	2.444	1.699	-1.581	1.008	0.97	0.913	0	NA	0	8	1	7	7	0.28	-0.04	-0.29	-0.29	-0.51	0.041033753	1.53E-05	2.43E-05	-0.286647229	1.362993835	-0.269461411	-0.074518312	52.81	54.28	-1.033956096	-1.172479452	1.04236706	0.898792426	-0.789963716	0.482159825	-0.135199748	-0.558810119	0.265622065	0.921353459
GUY	2018	Guyana	2	6	0.364	0.314	0.589	0.938	0.896	0.815	0.659	0.844	2.234	1.699	-0.971	0.979	1.053	0.876	0	NA	0	8	1	7	7	0.26	-0.18	-0.27	-0.32	-0.23	NA	NA	NA	NA	1.610922145	NA	NA	68.35	67.1	-0.311226694	-0.409257826	0.892063628	0.898792426	-0.245550873	0.482159825	-0.524459742	-0.606265266	0.288795211	0.940041942
HKG	2005	Hong Kong SAR	0	0	0.11	0.257	0.128	0.967	0.893	0.891	0.933	0.883	1.683	-1.492	-0.744	1.026	1.005	0.863	0	NA	0	NA	NA	NA	NA	0.62	1.34	1.61	1.61	1.78	NA	NA	NA	NA	-1.612145878	NA	NA	53.39	60.88	-1.00698164	-0.779557242	0.497696053	-2.318152273	-0.042957897	NA	-1.362358373	-0.799475506	-1.237321949	1.048435144
HKG	2006	Hong Kong SAR	0	0	0.11	0.257	0.128	0.967	0.888	0.901	0.933	0.882	1.683	-1.492	-0.744	1.027	1.009	0.869	0	NA	0	NA	NA	NA	NA	0.51	1.19	1.91	1.55	1.87	NA	NA	NA	NA	-1.364217568	NA	NA	64.29	71.49	-0.500047889	-0.147905022	0.497696053	-2.318152273	-0.042957897	NA	-1.362358373	-0.799475506	-1.237321949	1.048435144
HKG	2007	Hong Kong SAR	0	0	0.11	0.257	0.128	0.965	0.868	0.896	0.933	0.858	1.683	-1.492	-0.744	1.013	0.996	0.865	0	NA	0	NA	NA	NA	NA	0.48	1.1	1.87	1.53	1.92	NA	NA	NA	NA	-1.116289259	NA	NA	71.12	74.52	-0.182400411	0.032481993	0.497696053	-2.318152273	-0.042957897	NA	-1.362358373	-0.799475506	-1.237321949	1.040959751
HKG	2008	Hong Kong SAR	0	0	0.11	0.257	0.128	0.965	0.875	0.892	0.933	0.848	1.683	-1.492	-0.743	1.028	1.034	0.867	0	NA	0	NA	NA	NA	NA	0.45	1.13	1.86	1.49	1.9	NA	NA	NA	NA	-0.868360949	NA	NA	96.99	94.32	1.020753362	1.211248623	0.497696053	-2.318152273	-0.042065417	NA	-1.362358373	-0.799475506	-1.237321949	1.040959751
HKG	2009	Hong Kong SAR	0	0	0.11	0.257	0.128	0.965	0.852	0.892	0.933	0.827	1.603	-1.492	-0.721	1.026	1.037	0.857	0	NA	0	NA	NA	NA	NA	0.48	0.97	1.74	1.5	1.89	NA	NA	NA	NA	-0.62043264	NA	NA	61.76	64.02	-0.617712328	-0.592621524	0.440437603	-2.318152273	-0.022430856	NA	-1.362358373	-0.799475506	-1.237321949	1.040959751
HKG	2010	Hong Kong SAR	0	0	0.11	0.257	0.128	0.961	0.854	0.885	0.937	0.832	1.603	-1.492	-0.566	1.021	1.023	0.858	0	NA	0	NA	NA	NA	NA	0.51	0.94	1.68	1.54	1.96	0	0	0	-0.292149193	-0.372504331	-0.271236208	-0.074589294	79.04	79.04	0.185940443	0.301574173	0.440437603	-2.318152273	0.115903555	NA	-1.362358373	-0.799475506	-1.237321949	1.026008964
HKG	2011	Hong Kong SAR	0	0	0.11	0.257	0.128	0.961	0.853	0.885	0.937	0.843	1.603	-1.492	-0.566	1.024	1.028	0.876	0	NA	0	NA	NA	NA	NA	0.57	0.95	1.65	1.55	1.85	0	0	0	-0.292149193	-0.124576021	-0.271236208	-0.074589294	104.01	93.67	1.3472373	1.172551738	0.440437603	-2.318152273	0.115903555	NA	-1.362358373	-0.799475506	-1.237321949	1.026008964
HKG	2012	Hong Kong SAR	0	0	0.11	0.257	0.128	0.961	0.82	0.885	0.931	0.827	1.089	-1.492	-0.549	0.956	1.016	0.821	0	NA	0	NA	NA	NA	NA	0.64	1.01	1.83	1.58	1.74	0	0	0	-0.292149193	0.123352288	-0.271236208	-0.074589294	105.01	95.27	1.393744984	1.267805608	0.07255206	-2.318152273	0.131075716	NA	-1.362358373	-0.799475506	-1.237321949	1.026008964
HKG	2013	Hong Kong SAR	0	0	0.11	0.257	0.128	0.961	0.8	0.885	0.931	0.801	1.089	-1.492	-0.549	0.934	1.019	0.754	0	NA	0	NA	NA	NA	NA	0.73	0.92	1.75	1.57	1.64	0	0	0	-0.292149193	0.371280598	-0.271236208	-0.074589294	104.08	94.83	1.350492838	1.241610794	0.07255206	-2.318152273	0.131075716	NA	-1.362358373	-0.799475506	-1.237321949	1.026008964
HKG	2014	Hong Kong SAR	0	0	0.11	0.257	0.128	0.961	0.802	0.877	0.92	0.801	1.089	-1.492	-0.376	0.932	1.019	0.798	0	NA	0	NA	NA	NA	NA	0.54	1.15	1.83	1.86	1.62	0	0	0	-0.292149193	0.619208907	-0.271236208	-0.074589294	96.24	88.9	0.985872599	0.888576141	0.07255206	-2.318152273	0.285474768	NA	-1.362358373	-0.799475506	-1.237321949	1.026008964
HKG	2015	Hong Kong SAR	0	0	0.11	0.257	0.128	0.961	0.802	0.898	0.92	0.817	0.7	-1.492	-0.068	0.903	1.02	0.702	0	NA	0	NA	NA	NA	NA	0.51	1.05	1.91	1.83	1.65	0	0	0	-0.292149193	0.867137216	-0.271236208	-0.074589294	50.75	51.86	-1.129761924	-1.316550929	-0.205867153	-2.318152273	0.56035863	NA	-1.362358373	-0.799475506	-1.237321949	1.026008964
HKG	2016	Hong Kong SAR	0	0	0.11	0.257	0.128	0.961	0.772	0.898	0.92	0.817	0.7	-1.492	-0.156	0.829	0.923	0.686	0	NA	0	NA	NA	NA	NA	0.38	0.75	1.84	1.72	1.56	0	0	0	-0.292149193	1.115065526	-0.271236208	-0.074589294	42.81	45.53	-1.499032931	-1.693399049	-0.205867153	-2.318152273	0.481820383	NA	-1.362358373	-0.799475506	-1.237321949	1.026008964
HKG	2017	Hong Kong SAR	0	0	0.11	0.257	0.128	0.961	0.764	0.901	0.92	0.817	0.7	-1.492	-0.156	0.816	0.901	0.732	0	NA	0	NA	NA	NA	NA	0.43	0.83	1.9	1.72	1.61	0	0	0	-0.292149193	1.362993835	-0.271236208	-0.074589294	52.81	54.28	-1.033956096	-1.172479452	-0.205867153	-2.318152273	0.481820383	NA	-1.362358373	-0.799475506	-1.237321949	1.026008964
HKG	2018	Hong Kong SAR	0	0	0.103	0.228	0.127	0.961	0.735	0.837	0.896	0.756	0.441	-1.492	-0.186	0.725	0.891	0.647	0	NA	0	NA	NA	NA	NA	0.47	0.79	1.9	1.77	1.68	NA	NA	NA	NA	1.610922145	NA	NA	68.35	67.1	-0.311226694	-0.409257826	-0.391241386	-2.318152273	0.455045981	NA	-1.385450068	-0.897775453	-1.240632398	1.026008964
HND	2005	Honduras	2	6	0.876	0.855	0.874	0.616	0.838	0.85	0.291	0.788	1.33	-0.548	0.34	0.537	0.714	0.875	0	NA	0	7	0	7	7	-0.35	-0.63	-0.67	-0.78	-0.81	NA	NA	NA	NA	-1.612145878	NA	NA	53.39	60.88	-1.00698164	-0.779557242	0.245043141	-1.366477	0.924490498	0.482159825	1.164532774	1.227537192	1.232273281	-0.263496367
HND	2006	Honduras	2	5	0.874	0.853	0.868	0.664	0.845	0.85	0.316	0.785	1.33	-0.548	0.34	0.599	0.718	0.842	0	NA	0	7	0	7	7	-0.14	-0.67	-0.65	-0.99	-0.83	NA	NA	NA	NA	-1.364217568	NA	NA	64.29	71.49	-0.500047889	-0.147905022	0.245043141	-1.366477	0.924490498	0.482159825	1.157935147	1.220757885	1.212410585	-0.084086929
HND	2007	Honduras	2	6	0.878	0.862	0.872	0.664	0.854	0.85	0.308	0.786	1.33	-0.548	0.34	0.601	0.71	0.842	0	NA	0	7	0	7	7	-0.19	-0.44	-0.55	-0.93	-0.79	NA	NA	NA	NA	-1.116289259	NA	NA	71.12	74.52	-0.182400411	0.032481993	0.245043141	-1.366477	0.924490498	0.482159825	1.171130401	1.251264765	1.225652383	-0.084086929
HND	2008	Honduras	2	6	0.878	0.865	0.869	0.659	0.854	0.85	0.314	0.786	1.33	-0.548	0.462	0.632	0.711	0.842	0	NA	0	7	0	7	7	-0.29	-0.53	-0.62	-0.96	-0.9	NA	NA	NA	NA	-0.868360949	NA	NA	96.99	94.32	1.020753362	1.211248623	0.245043141	-1.366477	1.033373066	0.482159825	1.171130401	1.261433725	1.215721034	-0.102775412
HND	2009	Honduras	1	4	0.878	0.861	0.873	0.475	0.851	0.813	0.245	0.566	1.004	-0.548	1.803	0.438	0.561	0.81	0.001	NA	0	7	0	7	7	-0.53	-0.31	-0.68	-0.9	-0.9	NA	NA	NA	NA	-0.62043264	NA	NA	61.76	64.02	-0.617712328	-0.592621524	0.011714957	-1.366477	2.23018884	0.482159825	1.171130401	1.247875112	1.228962832	-0.790511589
HND	2010	Honduras	1	3	0.865	0.855	0.873	0.508	0.749	0.844	0.235	0.616	0.7	-0.548	1.714	0.394	0.575	0.725	0.1	NA	0	7	0	7	7	-0.5	-0.5	-0.64	-0.88	-0.89	0	0	0	-0.292149193	-0.372504331	-0.271236208	-0.074589294	79.04	79.04	0.185940443	0.301574173	-0.205867153	-1.366477	2.150758113	0.482159825	1.128245826	1.227537192	1.228962832	-0.667167601
HND	2011	Honduras	1	3	0.847	0.803	0.857	0.509	0.761	0.891	0.254	0.656	0.911	-0.548	1.439	0.468	0.577	0.764	0.1	NA	0	7	0	7	7	-0.47	-0.39	-0.54	-0.9	-0.83	0.162413087	5.77E-05	0.000208489	-0.270372217	-0.124576021	-0.264531143	-0.073981232	104.01	93.67	1.3472373	1.172551738	-0.054847991	-1.366477	1.905326094	0.482159825	1.068867183	1.051275218	1.175995642	-0.663429904
HND	2012	Honduras	1	4	0.825	0.743	0.827	0.576	0.766	0.891	0.32	0.689	0.806	-0.548	0.451	0.518	0.571	0.772	0.1	NA	0	7	0	7	7	-0.47	-0.35	-0.7	-1.14	-0.95	0.169880996	5.99E-05	0.000202722	-0.269370891	0.123352288	-0.264277262	-0.073998052	105.01	95.27	1.393744984	1.267805608	-0.129999707	-1.366477	1.023555786	0.482159825	0.996293286	0.847896018	1.076682161	-0.413004231
HND	2013	Honduras	1	4	0.829	0.828	0.829	0.809	0.796	0.872	0.33	0.729	0.936	-0.548	0.686	0.54	0.592	0.855	0.1	NA	0	7	0	7	7	-0.47	-0.44	-0.73	-1.16	-0.95	0.169083614	5.91E-05	0.000202982	-0.269477807	0.371280598	-0.264375268	-0.073997295	104.08	94.83	1.350492838	1.241610794	-0.036954725	-1.366477	1.233288602	0.482159825	1.00948854	1.136016552	1.08330306	0.457879079
HND	2014	Honduras	1	3	0.827	0.828	0.826	0.809	0.796	0.872	0.329	0.729	0.936	-0.548	0.353	0.545	0.571	0.855	0.1	NA	0	7	0	7	7	-0.41	-0.53	-0.81	-0.94	-0.79	0.169708613	5.89E-05	0.000191329	-0.269394005	0.619208907	-0.264392947	-0.07403128	96.24	88.9	0.985872599	0.888576141	-0.036954725	-1.366477	0.936092739	0.482159825	1.002890913	1.136016552	1.073371712	0.457879079
HND	2015	Honduras	1	3	0.831	0.827	0.849	0.726	0.788	0.866	0.296	0.699	0.936	-0.548	0.462	0.533	0.566	0.855	0.1	NA	0	7	0	7	7	-0.42	-0.47	-0.82	-0.93	-0.57	0	0	0	-0.292149193	0.867137216	-0.271236208	-0.074589294	50.75	51.86	-1.129761924	-1.316550929	-0.036954725	-1.366477	1.033373066	0.482159825	1.016086167	1.132626898	1.149512047	0.147650261
HND	2016	Honduras	1	3	0.83	0.833	0.845	0.746	0.788	0.882	0.283	0.699	0.936	-0.548	0.214	0.538	0.568	0.855	0.1	NA	0	7	0	7	7	-0.44	-0.43	-0.73	-1.12	-0.66	0.173261243	5.93E-05	0.000147582	-0.268917655	1.115065526	-0.26435247	-0.074158869	42.81	45.53	-1.499032931	-1.693399049	-0.036954725	-1.366477	0.812038009	0.482159825	1.012787353	1.152964819	1.13627025	0.222404193
HND	2017	Honduras	1	3	0.825	0.833	0.83	0.669	0.787	0.89	0.283	0.715	1.694	-0.548	0.314	0.432	0.365	0.873	0.1	NA	0	6	1	5	5	-0.44	-0.56	-0.51	-1.05	-0.72	0.177650568	6.04E-05	0.000145974	-0.268329117	1.362993835	-0.264218893	-0.074163558	52.81	54.28	-1.033956096	-1.172479452	0.50556909	-1.366477	0.901286016	0.162151437	0.996293286	1.152964819	1.086613509	-0.065398446
HND	2018	Honduras	1	3	0.834	0.833	0.884	0.768	0.788	0.883	0.302	0.671	1.888	-0.548	0.498	0.432	0.378	0.901	0.1	NA	0	7	0	7	7	-0.51	-0.55	-0.62	-1.02	-0.62	NA	NA	NA	NA	1.610922145	NA	NA	68.35	67.1	-0.311226694	-0.409257826	0.644420831	-1.366477	1.065502349	0.482159825	1.025982607	1.152964819	1.265377775	0.304633518
HRV	2005	Croatia	2	6	0.552	0.622	0.532	0.932	0.923	0.939	0.67	0.888	2.04	1.834	-1.938	1.293	1.248	0.884	0.1	0.128	0	9	0	9	9	0.45	0.43	0.46	0.13	0.17	NA	NA	NA	NA	-1.612145878	NA	NA	53.39	60.88	-1.00698164	-0.779557242	0.753211886	1.034890055	-1.1085791	0.802168213	0.095717198	0.437747963	0.100099597	0.917615763
HRV	2006	Croatia	2	6	0.552	0.622	0.532	0.932	0.918	0.934	0.67	0.891	2.04	1.834	-1.938	1.274	1.251	0.884	0.1	0.128	0	9	0	9	9	0.48	0.56	0.57	0.01	0.08	NA	NA	NA	NA	-1.364217568	NA	NA	64.29	71.49	-0.500047889	-0.147905022	0.753211886	1.034890055	-1.1085791	0.802168213	0.095717198	0.437747963	0.100099597	0.917615763
HRV	2007	Croatia	2	6	0.547	0.593	0.532	0.932	0.914	0.937	0.662	0.886	2.04	1.851	-1.938	1.307	1.268	0.884	0.1	0.128	0	9	0	9	9	0.52	0.6	0.47	0.09	0.09	NA	NA	NA	NA	-1.116289259	NA	NA	71.12	74.52	-0.182400411	0.032481993	0.753211886	1.052028275	-1.1085791	0.802168213	0.07922313	0.339448016	0.100099597	0.917615763
HRV	2008	Croatia	2	6	0.53	0.593	0.532	0.932	0.923	0.937	0.662	0.891	2.04	1.142	-1.938	1.308	1.267	0.886	0.1	0.128	0	9	0	9	9	0.47	0.57	0.57	0.09	-0.01	NA	NA	NA	NA	-0.868360949	NA	NA	96.99	94.32	1.020753362	1.211248623	0.753211886	0.33726369	-1.1085791	0.802168213	0.023143301	0.339448016	0.100099597	0.917615763
HRV	2009	Croatia	2	7	0.519	0.549	0.347	0.932	0.918	0.937	0.702	0.901	2.486	1.133	-1.938	1.436	1.435	0.903	0.1	0.128	0	9	0	9	9	0.49	0.61	0.6	0.16	-0.05	NA	NA	NA	NA	-0.62043264	NA	NA	61.76	64.02	-0.617712328	-0.592621524	1.072427746	0.328190515	-1.1085791	0.802168213	-0.013143648	0.190303269	-0.512333537	0.917615763
HRV	2010	Croatia	2	6	0.354	0.232	0.368	0.954	0.932	0.937	0.792	0.891	2.811	1.116	-1.885	1.484	1.427	0.916	0.1	0.128	0	9	0	9	9	0.48	0.61	0.62	0.2	0.06	0	0	0	-0.292149193	-0.372504331	-0.271236208	-0.074589294	79.04	79.04	0.185940443	0.301574173	1.3050402	0.311052295	-1.061277657	0.802168213	-0.557447877	-0.88421684	-0.4428141	0.999845088
HRV	2011	Croatia	2	6	0.354	0.246	0.368	0.953	0.935	0.949	0.808	0.89	2.811	1.116	-1.751	1.509	1.433	0.903	0.1	0.128	0	9	0	9	9	0.52	0.62	0.56	0.22	0.06	0	0	0	-0.292149193	-0.124576021	-0.271236208	-0.074589294	104.01	93.67	1.3472373	1.172551738	1.3050402	0.311052295	-0.941685327	0.802168213	-0.557447877	-0.836761693	-0.4428141	0.996107391
HRV	2012	Croatia	2	6	0.354	0.246	0.368	0.953	0.926	0.941	0.812	0.892	2.811	1.888	-1.791	1.486	1.434	0.895	0.1	0.128	0	9	0	9	9	0.54	0.61	0.71	0.25	0.01	0	0	0	-0.292149193	0.123352288	-0.271236208	-0.074589294	105.01	95.27	1.393744984	1.267805608	1.3050402	1.089329107	-0.97738453	0.802168213	-0.557447877	-0.836761693	-0.4428141	0.996107391
HRV	2013	Croatia	2	7	0.399	0.266	0.271	0.966	0.901	0.942	0.788	0.854	2.48	1.816	-1.59	1.416	1.422	0.862	1	-0.778	0	9	0	9	9	0.51	0.64	0.7	0.29	0.12	0	0	0	-0.292149193	0.371280598	-0.271236208	-0.074589294	104.08	94.83	1.350492838	1.241610794	1.068133362	1.016743705	-0.797996036	0.802168213	-0.409001269	-0.768968626	-0.763927689	1.044697447
HRV	2014	Croatia	2	6	0.4	0.268	0.268	0.966	0.91	0.942	0.781	0.87	2.48	1.816	-1.106	1.427	1.466	0.862	1	-0.737	0	9	0	9	9	0.51	0.62	0.69	0.32	0.22	0	0	0	-0.292149193	0.619208907	-0.271236208	-0.074589294	96.24	88.9	0.985872599	0.888576141	1.068133362	1.016743705	-0.366035683	0.802168213	-0.405702456	-0.76218932	-0.773859037	1.044697447
HRV	2015	Croatia	2	6	0.398	0.268	0.269	0.966	0.891	0.931	0.743	0.862	1.792	1.136	-1.106	1.422	1.473	0.849	1	-0.78	0	9	0	9	9	0.56	0.59	0.51	0.2	0.25	0	0	0	-0.292149193	0.867137216	-0.271236208	-0.074589294	50.75	51.86	-1.129761924	-1.316550929	0.575710691	0.331214906	-0.366035683	0.802168213	-0.412300083	-0.76218932	-0.770548588	1.044697447
HRV	2016	Croatia	2	6	0.412	0.235	0.365	0.934	0.805	0.925	0.727	0.751	0.785	1.145	-0.999	1.268	1.44	0.749	1	-0.506	0	9	0	9	9	0.52	0.66	0.49	0.41	0.2	0	0	0	-0.292149193	1.115065526	-0.271236208	-0.074589294	42.81	45.53	-1.499032931	-1.693399049	-0.14503005	0.340288082	-0.270540315	0.802168213	-0.366116693	-0.87404788	-0.452745448	0.925091156
HRV	2017	Croatia	2	6	0.445	0.302	0.43	0.952	0.78	0.893	0.743	0.742	1.312	1.846	-1.003	1.261	1.434	0.795	1	1.52	0	9	0	9	9	0.51	0.69	0.57	0.33	0.19	0	0	0	-0.292149193	1.362993835	-0.271236208	-0.074589294	52.81	54.28	-1.033956096	-1.172479452	0.23215999	1.046987622	-0.274110235	0.802168213	-0.257255848	-0.646941106	-0.237566239	0.992369695
HRV	2018	Croatia	2	6	0.458	0.277	0.423	0.912	0.78	0.924	0.752	0.696	1.396	1.86	-0.6	1.189	1.404	0.822	0.94	1.501	0	9	0	9	9	0.5	0.77	0.46	0.32	0.13	NA	NA	NA	NA	1.610922145	NA	NA	68.35	67.1	-0.311226694	-0.409257826	0.292281363	1.06110145	0.085559233	0.802168213	-0.214371272	-0.73168244	-0.260739385	0.84286183
HTI	2005	Haiti	0	0	0.855	0.757	0.88	0.63	0.763	0.611	0.17	0.725	0.741	-0.248	0.004	0.248	-0.712	0.714	0	1.254	0	-88	-88	-88	3	-1.23	-1.81	-1.33	-1.64	-1.37	NA	NA	NA	NA	-1.612145878	NA	NA	53.39	60.88	-1.00698164	-0.779557242	-0.176522198	-1.064037824	0.624617195	-0.157856952	1.095257691	0.895351165	1.252135978	-0.211168614
HTI	2006	Haiti	1	3	0.872	0.757	0.88	0.664	0.771	0.643	0.244	0.738	0.741	-0.248	0.004	0.514	0.495	0.714	0	1.254	0	6	1	5	5	-0.71	-1.39	-1.28	-1.41	-1.31	NA	NA	NA	NA	-1.364217568	NA	NA	64.29	71.49	-0.500047889	-0.147905022	-0.176522198	-1.064037824	0.624617195	0.162151437	1.15133752	0.895351165	1.252135978	-0.084086929
HTI	2007	Haiti	1	3	0.872	0.757	0.88	0.82	0.817	0.748	0.257	0.818	0.741	-0.248	0.004	0.6	0.512	0.714	0	1.254	0	6	1	5	5	-0.61	-1.32	-1.3	-1.34	-1.28	NA	NA	NA	NA	-1.116289259	NA	NA	71.12	74.52	-0.182400411	0.032481993	-0.176522198	-1.064037824	0.624617195	0.162151437	1.15133752	0.895351165	1.252135978	0.498993742
HTI	2008	Haiti	1	3	0.872	0.757	0.88	0.82	0.807	0.748	0.28	0.815	0.741	-0.248	0.004	0.59	0.509	0.714	0	1.254	0	6	1	5	5	-0.59	-1.39	-1.29	-1.28	-1.21	NA	NA	NA	NA	-0.868360949	NA	NA	96.99	94.32	1.020753362	1.211248623	-0.176522198	-1.064037824	0.624617195	0.162151437	1.15133752	0.895351165	1.252135978	0.498993742
HTI	2009	Haiti	1	3	0.872	0.757	0.88	0.82	0.822	0.748	0.279	0.834	0.741	-0.248	0.004	0.591	0.507	0.714	0	1.254	0	6	1	5	5	-0.66	-0.96	-1.49	-1.32	-1.09	NA	NA	NA	NA	-0.62043264	NA	NA	61.76	64.02	-0.617712328	-0.592621524	-0.176522198	-1.064037824	0.624617195	0.162151437	1.15133752	0.895351165	1.252135978	0.498993742
HTI	2010	Haiti	1	3	0.892	0.796	0.88	0.82	0.818	0.779	0.175	0.805	0.741	-0.248	0.004	0.509	0.377	0.714	0	1.254	0	-77	-77	-77	0	-0.71	-0.94	-1.63	-1.37	-1.19	0.000967811	3.20E-07	3.97E-07	-0.292019426	-0.372504331	-0.27119909	-0.074588135	79.04	79.04	0.185940443	0.301574173	-0.176522198	-1.064037824	0.624617195	-0.637869534	1.217313791	1.027547645	1.252135978	0.498993742
HTI	2011	Haiti	1	4	0.892	0.796	0.88	0.755	0.811	0.779	0.19	0.805	0.741	-0.248	0.004	0.488	0.363	0.714	0	1.254	0	-77	-77	-77	0	-0.75	-0.99	-1.67	-1.41	-1.22	0.202929472	0.008117179	7.93E-05	-0.264939624	-0.124576021	0.671427557	-0.074358103	104.01	93.67	1.3472373	1.172551738	-0.176522198	-1.064037824	0.624617195	-0.637869534	1.217313791	1.027547645	1.252135978	0.256043462
HTI	2012	Haiti	1	4	0.887	0.796	0.88	0.759	0.802	0.775	0.22	0.79	0.741	-0.248	0.004	0.477	0.409	0.714	0	1.254	0	-77	-77	-77	0	-0.76	-0.79	-1.65	-1.33	-1.24	0.213021336	0.004176889	8.18E-05	-0.263586467	0.123352288	0.213834026	-0.074350707	105.01	95.27	1.393744984	1.267805608	-0.176522198	-1.064037824	0.624617195	-0.637869534	1.200819723	1.027547645	1.252135978	0.270994249
HTI	2013	Haiti	1	3	0.856	0.719	0.845	0.768	0.814	0.874	0.161	0.779	0.965	-0.248	0.239	0.546	0.391	0.884	0	1.778	0	-77	-77	-77	0	-0.75	-0.63	-1.58	-1.29	-1.13	0.228174524	0.002535272	8.45E-05	-0.261554669	0.371280598	0.023189915	-0.074342913	104.08	94.83	1.350492838	1.241610794	-0.016198537	-1.064037824	0.834350011	-0.637869534	1.098556504	0.766544338	1.13627025	0.304633518
HTI	2014	Haiti	1	3	0.866	0.719	0.845	0.768	0.814	0.874	0.147	0.779	0.965	-0.248	0.239	0.535	0.381	0.884	0	1.778	0	-77	-77	-77	0	-0.79	-0.64	-2.04	-1.19	-1.23	0.205156918	0.001566083	7.52E-05	-0.264640959	0.619208907	-0.089363904	-0.07437004	96.24	88.9	0.985872599	0.888576141	-0.016198537	-1.064037824	0.834350011	-0.637869534	1.131544639	0.766544338	1.13627025	0.304633518
HTI	2015	Haiti	1	3	0.875	0.719	0.845	0.768	0.814	0.874	0.14	0.779	0.965	-0.248	0.239	0.506	0.326	0.884	0	0.661	1	-77	-77	-77	0	-0.8	-0.67	-2.02	-1.18	-1.24	0.205657301	0.001277375	7.55E-05	-0.264573866	0.867137216	-0.122892219	-0.074369021	50.75	51.86	-1.129761924	-1.316550929	-0.016198537	-1.064037824	0.834350011	-0.637869534	1.161233961	0.766544338	1.13627025	0.304633518
HTI	2016	Haiti	1	3	0.857	0.719	0.845	0.775	0.841	0.88	0.192	0.819	0.965	-0.248	0.239	0.547	0.339	0.884	0	1.8	0	-88	-88	-88	5	-0.76	-0.74	-2.08	-1	-1.33	0.205420676	0.001011925	7.85E-05	-0.264605593	1.115065526	-0.153719447	-0.074360275	42.81	45.53	-1.499032931	-1.693399049	-0.016198537	-1.064037824	0.834350011	0.162151437	1.101855318	0.766544338	1.13627025	0.330797395
HTI	2017	Haiti	1	3	0.866	0.725	0.847	0.697	0.836	0.735	0.158	0.753	0.971	-0.248	0.276	0.536	0.35	0.871	0	1.809	0	6	1	5	5	-0.74	-0.67	-2.07	-1.09	-1.24	0.205312336	0.000869968	7.62E-05	-0.26462012	1.362993835	-0.170205188	-0.074366941	52.81	54.28	-1.033956096	-1.172479452	-0.011904154	-1.064037824	0.867371773	0.162151437	1.131544639	0.786882258	1.142891148	0.039257059
HTI	2018	Haiti	1	3	0.909	0.838	0.875	0.22	0.708	0.596	0.132	0.509	0.861	-0.248	0.19	0.359	0.328	0.801	0	1.809	1	6	1	5	5	-0.75	-0.63	-1.91	-1.03	-1.27	NA	NA	NA	NA	1.610922145	NA	NA	68.35	67.1	-0.311226694	-0.409257826	-0.090634522	-1.064037824	0.790618487	0.162151437	1.27339362	1.169913085	1.235583731	-1.743624225
HUN	2005	Hungary	3	8	0.316	0.366	0.183	0.949	0.938	0.925	0.885	0.969	1.848	0.521	-0.204	1.457	1.362	0.801	0.9	1.22	0	10	0	10	10	1.18	1	0.77	0.86	0.65	NA	NA	NA	NA	-1.612145878	NA	NA	53.39	60.88	-1.00698164	-0.779557242	0.615791606	-0.288785404	0.43898134	0.962172408	-0.68280279	-0.430003292	-1.055247234	0.981156605
HUN	2006	Hungary	2	7	0.314	0.366	0.183	0.918	0.914	0.925	0.874	0.94	1.125	0.436	0.587	1.369	1.415	0.689	0.9	1.259	0	10	0	10	10	1.02	0.99	0.87	1	0.66	NA	NA	NA	NA	-1.364217568	NA	NA	64.29	71.49	-0.500047889	-0.147905022	0.098318363	-0.374476504	1.144933075	0.962172408	-0.689400417	-0.430003292	-1.055247234	0.86528801
HUN	2007	Hungary	3	8	0.328	0.381	0.183	0.939	0.93	0.925	0.885	0.948	1.848	0.436	0.396	1.446	1.423	0.811	0.9	1.259	0	10	0	10	10	1.04	0.75	0.71	0.96	0.62	NA	NA	NA	NA	-1.116289259	NA	NA	71.12	74.52	-0.182400411	0.032481993	0.615791606	-0.374476504	0.974469382	0.962172408	-0.643217028	-0.379158492	-1.055247234	0.943779639
HUN	2008	Hungary	3	8	0.328	0.381	0.183	0.939	0.938	0.925	0.885	0.949	1.848	0.436	0.203	1.461	1.417	0.811	1	1.259	0	10	0	10	10	0.97	0.75	0.71	0.93	0.47	NA	NA	NA	NA	-0.868360949	NA	NA	96.99	94.32	1.020753362	1.211248623	0.615791606	-0.374476504	0.802220728	0.962172408	-0.643217028	-0.379158492	-1.055247234	0.943779639
HUN	2009	Hungary	3	8	0.32	0.353	0.183	0.939	0.937	0.925	0.889	0.957	1.848	0.322	0.203	1.459	1.419	0.811	1	1.248	0	10	0	10	10	0.91	0.54	0.67	0.8	0.43	NA	NA	NA	NA	-0.62043264	NA	NA	61.76	64.02	-0.617712328	-0.592621524	0.615791606	-0.48940339	0.802220728	0.962172408	-0.669607536	-0.474068786	-1.055247234	0.943779639
HUN	2010	Hungary	2	6	0.378	0.48	0.238	0.954	0.869	0.914	0.813	0.901	1.302	1.145	-0.104	1.164	1.225	0.732	1	1.126	0	10	0	10	10	0.89	0.69	0.67	0.78	0.37	0.033470523	0.008367631	0.000293601	-0.287661336	-0.372504331	0.70051302	-0.073733002	79.04	79.04	0.185940443	0.301574173	0.225002684	0.340288082	0.528229347	0.962172408	-0.478276353	-0.043582811	-0.873172518	0.999845088
HUN	2011	Hungary	2	6	0.39	0.535	0.279	0.951	0.875	0.904	0.792	0.869	0.988	1.145	-0.104	1.119	1.167	0.754	1	1.126	0	10	0	10	10	0.84	0.74	0.67	0.76	0.4	0.032145398	1.06E-05	0.000215741	-0.287839014	-0.124576021	-0.270004972	-0.073960082	104.01	93.67	1.3472373	1.172551738	0.000263267	0.340288082	0.528229347	0.962172408	-0.438690591	0.142848123	-0.737444094	0.988631998
HUN	2012	Hungary	2	6	0.377	0.472	0.279	0.951	0.845	0.888	0.801	0.841	0.988	1.806	-0.104	1.094	1.175	0.754	1	1.126	0	10	0	10	10	0.75	0.68	0.63	0.62	0.36	0.02884521	9.54E-06	0.000277358	-0.288281516	0.123352288	-0.270128087	-0.073780376	105.01	95.27	1.393744984	1.267805608	0.000263267	1.006662399	0.528229347	0.962172408	-0.481575166	-0.070700038	-0.737444094	0.988631998
HUN	2013	Hungary	2	6	0.425	0.564	0.213	0.927	0.833	0.923	0.76	0.839	1.202	1.805	0.303	1.023	1.151	0.622	0.94	0.972	0	10	0	10	10	0.74	0.8	0.65	0.58	0.32	0.02166899	7.17E-06	0.000170622	-0.289243731	0.371280598	-0.270403494	-0.074091672	104.08	94.83	1.350492838	1.241610794	0.153429621	1.005654268	0.891468735	0.962172408	-0.323232118	0.24114807	-0.955933752	0.89892728
HUN	2014	Hungary	2	6	0.425	0.564	0.213	0.927	0.845	0.923	0.777	0.814	1.046	1.785	0.059	0.936	0.987	0.66	0.88	0.972	0	10	0	10	10	0.55	0.67	0.53	0.5	0.16	0.020839252	6.91E-06	0.000141764	-0.289354986	0.619208907	-0.270433786	-0.074175838	96.24	88.9	0.985872599	0.888576141	0.041775643	0.985491656	0.673703598	0.962172408	-0.323232118	0.24114807	-0.955933752	0.89892728
HUN	2015	Hungary	2	6	0.431	0.564	0.213	0.927	0.825	0.919	0.777	0.774	0.61	1.798	0.173	0.909	0.991	0.662	0.82	0.972	0	10	0	10	10	0.56	0.75	0.5	0.4	0.15	0	0	0	-0.292149193	0.867137216	-0.271236208	-0.074589294	50.75	51.86	-1.129761924	-1.316550929	-0.27028291	0.998597354	0.775446326	0.962172408	-0.303439237	0.24114807	-0.955933752	0.89892728
HUN	2016	Hungary	2	6	0.434	0.576	0.213	0.926	0.814	0.919	0.756	0.794	0.534	1.767	0.173	0.887	0.989	0.653	0.76	0.972	0	10	0	10	10	0.4	0.65	0.46	0.42	0.1	0	0	0	-0.292149193	1.115065526	-0.271236208	-0.074589294	42.81	45.53	-1.499032931	-1.693399049	-0.324678437	0.967345306	0.775446326	0.962172408	-0.293542796	0.28182391	-0.955933752	0.895189583
HUN	2017	Hungary	2	6	0.445	0.574	0.215	0.952	0.802	0.905	0.766	0.697	0.192	1.804	0.121	0.79	0.96	0.572	0.7	0.96	0	10	0	10	10	0.37	0.81	0.52	0.53	0.09	0	0	0	-0.292149193	1.362993835	-0.271236208	-0.074589294	52.81	54.28	-1.033956096	-1.172479452	-0.569458312	1.004646138	0.729037363	0.962172408	-0.257255848	0.275044603	-0.949312854	0.992369695
HUN	2018	Hungary	2	5	0.466	0.653	0.221	0.952	0.683	0.87	0.731	0.683	0.036	1.782	0.289	0.597	0.694	0.492	0.64	0.971	0	10	0	10	10	0.32	0.76	0.49	0.56	0.05	NA	NA	NA	NA	1.610922145	NA	NA	68.35	67.1	-0.311226694	-0.409257826	-0.68111229	0.982467265	0.878974014	0.962172408	-0.187980764	0.542827217	-0.929450158	0.992369695
IDN	2005	Indonesia	2	6	0.77	0.553	0.665	0.724	0.837	0.751	0.594	0.805	2.235	1.891	-0.014	1.333	1.437	0.873	0	NA	1	8	0	8	8	-0.12	-1.52	-0.48	-0.82	-0.88	NA	NA	NA	NA	-1.612145878	NA	NA	53.39	60.88	-1.00698164	-0.779557242	0.892779359	1.092353498	0.608552553	0.642164019	0.814858543	0.203861883	0.540389363	0.140174867
IDN	2006	Indonesia	2	6	0.771	0.553	0.665	0.724	0.844	0.748	0.598	0.816	2.235	1.891	-0.014	1.328	1.439	0.873	0	NA	0	8	0	8	8	-0.08	-1.42	-0.33	-0.72	-0.84	NA	NA	NA	NA	-1.364217568	NA	NA	64.29	71.49	-0.500047889	-0.147905022	0.892779359	1.092353498	0.608552553	0.642164019	0.818157356	0.203861883	0.540389363	0.140174867
IDN	2007	Indonesia	2	6	0.771	0.553	0.665	0.724	0.844	0.746	0.573	0.816	2.235	1.891	-0.014	1.326	1.433	0.873	0	NA	0	8	0	8	8	-0.02	-1.2	-0.28	-0.68	-0.62	NA	NA	NA	NA	-1.116289259	NA	NA	71.12	74.52	-0.182400411	0.032481993	0.892779359	1.092353498	0.608552553	0.642164019	0.818157356	0.203861883	0.540389363	0.140174867
IDN	2008	Indonesia	2	6	0.775	0.553	0.665	0.728	0.828	0.728	0.624	0.806	2.207	1.891	0.017	1.332	1.444	0.885	0	NA	1	8	0	8	8	-0.01	-1.06	-0.24	-0.65	-0.59	NA	NA	NA	NA	-0.868360949	NA	NA	96.99	94.32	1.020753362	1.211248623	0.872738901	1.092353498	0.636219435	0.642164019	0.83135261	0.203861883	0.540389363	0.155125654
IDN	2009	Indonesia	2	6	0.768	0.553	0.665	0.728	0.828	0.729	0.594	0.806	2.207	1.891	0.017	1.23	1.223	0.885	0	NA	0	8	0	8	8	0	-0.75	-0.3	-0.6	-0.84	NA	NA	NA	NA	-0.62043264	NA	NA	61.76	64.02	-0.617712328	-0.592621524	0.872738901	1.092353498	0.636219435	0.642164019	0.808260916	0.203861883	0.540389363	0.155125654
IDN	2010	Indonesia	2	6	0.769	0.574	0.68	0.726	0.829	0.751	0.612	0.828	1.806	1.891	-0.281	1.214	1.174	0.867	0	NA	0	8	0	8	8	-0.04	-0.85	-0.21	-0.64	-0.75	24.19935258	0.022140304	0.009675871	2.95259377	-0.372504331	2.299960374	-0.046369478	79.04	79.04	0.185940443	0.301574173	0.58573092	1.092353498	0.370260375	0.642164019	0.811559729	0.275044603	0.590046103	0.147650261
IDN	2011	Indonesia	2	6	0.769	0.574	0.68	0.726	0.811	0.737	0.582	0.821	1.806	1.891	-0.281	1.189	1.174	0.867	0	NA	0	8	0	8	8	-0.01	-0.77	-0.26	-0.59	-0.7	37.46803621	0.033846465	0.014187064	4.731710286	-0.124576021	3.659419521	-0.033212518	104.01	93.67	1.3472373	1.172551738	0.58573092	1.092353498	0.370260375	0.642164019	0.811559729	0.275044603	0.590046103	0.147650261
IDN	2012	Indonesia	2	6	0.769	0.574	0.68	0.702	0.83	0.75	0.544	0.79	1.806	1.891	-0.281	1.194	1.17	0.867	0	NA	1	8	0	8	8	0.07	-0.59	-0.27	-0.58	-0.64	41.60767372	0.037282862	0.015086176	5.286768924	0.123352288	4.058495015	-0.030590244	105.01	95.27	1.393744984	1.267805608	0.58573092	1.092353498	0.370260375	0.642164019	0.811559729	0.275044603	0.590046103	0.057945542
IDN	2013	Indonesia	2	6	0.758	0.573	0.703	0.734	0.83	0.754	0.535	0.791	1.913	1.891	0.162	1.22	1.18	0.878	0	NA	1	8	0	8	8	0.04	-0.52	-0.2	-0.53	-0.61	42.53082455	0.037637898	0.015432084	5.410548565	0.371280598	4.099726044	-0.029581398	104.08	94.83	1.350492838	1.241610794	0.662314097	1.092353498	0.765629046	0.642164019	0.77527278	0.27165495	0.666186439	0.177551834
IDN	2014	Indonesia	2	6	0.755	0.573	0.702	0.746	0.822	0.723	0.58	0.802	1.913	1.891	0.162	1.196	1.127	0.878	0	NA	1	9	0	9	9	0.15	-0.42	-0.04	-0.34	-0.56	34.81957886	0.030570306	0.013199234	4.376594862	0.619208907	3.278952897	-0.036093539	96.24	88.9	0.985872599	0.888576141	0.662314097	1.092353498	0.765629046	0.802168213	0.76537634	0.27165495	0.66287599	0.222404193
IDN	2015	Indonesia	2	6	0.68	0.55	0.646	0.8	0.867	0.786	0.7	0.852	1.839	1.891	0.167	1.251	1.183	0.866	0	NA	0	9	0	9	9	0.18	-0.62	-0.24	-0.42	-0.46	10.85195255	0.009428282	0.004123082	1.162922655	0.867137216	0.823688508	-0.062564265	50.75	51.86	-1.129761924	-1.316550929	0.60935003	1.092353498	0.770091446	0.802168213	0.517965327	0.193692923	0.477490825	0.42423981
IDN	2016	Indonesia	2	6	0.675	0.55	0.646	0.783	0.874	0.787	0.675	0.852	1.839	1.891	0.167	1.261	1.189	0.866	0	NA	0	9	0	9	9	0.17	-0.37	0.01	-0.34	-0.4	19.10492286	0.016455575	0.006922074	2.269512893	1.115065526	1.639781739	-0.054400967	42.81	45.53	-1.499032931	-1.693399049	0.60935003	1.092353498	0.770091446	0.802168213	0.501471259	0.193692923	0.477490825	0.360698968
IDN	2017	Indonesia	2	6	0.687	0.552	0.645	0.786	0.847	0.782	0.69	0.833	1.836	1.891	0.234	1.213	1.183	0.81	0	NA	0	9	0	9	9	0.13	-0.5	0.04	-0.35	-0.25	26.21467171	0.022329363	2.016513208	3.222815569	1.362993835	2.321916086	5.806600433	52.81	54.28	-1.033956096	-1.172479452	0.607202839	1.092353498	0.829887611	0.802168213	0.541057021	0.200472229	0.474180375	0.371912057
IDN	2018	Indonesia	2	6	0.699	0.552	0.656	0.763	0.813	0.73	0.67	0.786	1.172	1.891	0.424	1.143	1.183	0.757	0	NA	0	9	0	9	9	0.18	-0.53	0.18	-0.31	-0.25	NA	NA	NA	NA	1.610922145	NA	NA	68.35	67.1	-0.311226694	-0.409257826	0.131957702	1.092353498	0.999458824	0.802168213	0.580642783	0.200472229	0.510595319	0.285945035
IMY	2005	Isle of Man	NA	NA	NA	NA	NA	NA	NA	NA	NA	NA	NA	NA	NA	NA	NA	NA	NA	NA	0	NA	NA	NA	NA	NA	NA	NA	NA	NA	NA	NA	NA	NA	-1.612145878	NA	NA	53.39	60.88	-1.00698164	-0.779557242	NA	NA	NA	NA	NA	NA	NA	NA
IMY	2006	Isle of Man	NA	NA	NA	NA	NA	NA	NA	NA	NA	NA	NA	NA	NA	NA	NA	NA	NA	NA	0	NA	NA	NA	NA	NA	NA	NA	NA	NA	NA	NA	NA	NA	-1.364217568	NA	NA	64.29	71.49	-0.500047889	-0.147905022	NA	NA	NA	NA	NA	NA	NA	NA
IMY	2007	Isle of Man	NA	NA	NA	NA	NA	NA	NA	NA	NA	NA	NA	NA	NA	NA	NA	NA	NA	NA	0	NA	NA	NA	NA	NA	NA	NA	NA	NA	NA	NA	NA	NA	-1.116289259	NA	NA	71.12	74.52	-0.182400411	0.032481993	NA	NA	NA	NA	NA	NA	NA	NA
IMY	2008	Isle of Man	NA	NA	NA	NA	NA	NA	NA	NA	NA	NA	NA	NA	NA	NA	NA	NA	NA	NA	0	NA	NA	NA	NA	NA	NA	NA	NA	NA	NA	NA	NA	NA	-0.868360949	NA	NA	96.99	94.32	1.020753362	1.211248623	NA	NA	NA	NA	NA	NA	NA	NA
IMY	2009	Isle of Man	NA	NA	NA	NA	NA	NA	NA	NA	NA	NA	NA	NA	NA	NA	NA	NA	NA	NA	0	NA	NA	NA	NA	NA	NA	NA	NA	NA	NA	NA	NA	NA	-0.62043264	NA	NA	61.76	64.02	-0.617712328	-0.592621524	NA	NA	NA	NA	NA	NA	NA	NA
IMY	2010	Isle of Man	NA	NA	NA	NA	NA	NA	NA	NA	NA	NA	NA	NA	NA	NA	NA	NA	NA	NA	0	NA	NA	NA	NA	NA	NA	NA	NA	NA	NA	NA	NA	NA	-0.372504331	NA	NA	79.04	79.04	0.185940443	0.301574173	NA	NA	NA	NA	NA	NA	NA	NA
IMY	2011	Isle of Man	NA	NA	NA	NA	NA	NA	NA	NA	NA	NA	NA	NA	NA	NA	NA	NA	NA	NA	0	NA	NA	NA	NA	NA	NA	NA	NA	NA	NA	NA	NA	NA	-0.124576021	NA	NA	104.01	93.67	1.3472373	1.172551738	NA	NA	NA	NA	NA	NA	NA	NA
IMY	2012	Isle of Man	NA	NA	NA	NA	NA	NA	NA	NA	NA	NA	NA	NA	NA	NA	NA	NA	NA	NA	0	NA	NA	NA	NA	NA	NA	NA	NA	NA	NA	NA	NA	NA	0.123352288	NA	NA	105.01	95.27	1.393744984	1.267805608	NA	NA	NA	NA	NA	NA	NA	NA
IMY	2013	Isle of Man	NA	NA	NA	NA	NA	NA	NA	NA	NA	NA	NA	NA	NA	NA	NA	NA	NA	NA	0	NA	NA	NA	NA	NA	NA	NA	NA	NA	NA	NA	NA	NA	0.371280598	NA	NA	104.08	94.83	1.350492838	1.241610794	NA	NA	NA	NA	NA	NA	NA	NA
IMY	2014	Isle of Man	NA	NA	NA	NA	NA	NA	NA	NA	NA	NA	NA	NA	NA	NA	NA	NA	NA	NA	0	NA	NA	NA	NA	NA	NA	NA	NA	NA	NA	NA	NA	NA	0.619208907	NA	NA	96.24	88.9	0.985872599	0.888576141	NA	NA	NA	NA	NA	NA	NA	NA
IMY	2015	Isle of Man	NA	NA	NA	NA	NA	NA	NA	NA	NA	NA	NA	NA	NA	NA	NA	NA	NA	NA	0	NA	NA	NA	NA	NA	NA	NA	NA	NA	NA	NA	NA	NA	0.867137216	NA	NA	50.75	51.86	-1.129761924	-1.316550929	NA	NA	NA	NA	NA	NA	NA	NA
IMY	2016	Isle of Man	NA	NA	NA	NA	NA	NA	NA	NA	NA	NA	NA	NA	NA	NA	NA	NA	NA	NA	0	NA	NA	NA	NA	NA	NA	NA	NA	NA	NA	NA	NA	NA	1.115065526	NA	NA	42.81	45.53	-1.499032931	-1.693399049	NA	NA	NA	NA	NA	NA	NA	NA
IMY	2017	Isle of Man	NA	NA	NA	NA	NA	NA	NA	NA	NA	NA	NA	NA	NA	NA	NA	NA	NA	NA	0	NA	NA	NA	NA	NA	NA	NA	NA	NA	NA	NA	NA	NA	1.362993835	NA	NA	52.81	54.28	-1.033956096	-1.172479452	NA	NA	NA	NA	NA	NA	NA	NA
IMY	2018	Isle of Man	NA	NA	NA	NA	NA	NA	NA	NA	NA	NA	NA	NA	NA	NA	NA	NA	NA	NA	0	NA	NA	NA	NA	NA	NA	NA	NA	NA	NA	NA	NA	NA	1.610922145	NA	NA	68.35	67.1	-0.311226694	-0.409257826	NA	NA	NA	NA	NA	NA	NA	NA
IND	2005	India	2	6	0.5	0.37	0.348	0.709	0.844	0.641	0.681	0.862	1.455	0.967	0.454	1.324	1.328	0.805	0	1.23	0	9	0	9	9	0.41	-1.01	-0.11	0.13	-0.36	NA	NA	NA	NA	-1.612145878	NA	NA	53.39	60.88	-1.00698164	-0.779557242	0.33450947	0.160840837	1.026233226	0.802168213	-0.075821105	-0.416444679	-0.509023087	0.084109418
IND	2006	India	2	6	0.5	0.37	0.348	0.709	0.844	0.641	0.688	0.862	1.455	0.967	0.454	1.321	1.328	0.805	0	1.23	1	9	0	9	9	0.44	-1.06	-0.1	0.18	-0.28	NA	NA	NA	NA	-1.364217568	NA	NA	64.29	71.49	-0.500047889	-0.147905022	0.33450947	0.160840837	1.026233226	0.802168213	-0.075821105	-0.416444679	-0.509023087	0.084109418
IND	2007	India	2	6	0.5	0.37	0.348	0.709	0.844	0.641	0.688	0.862	1.455	0.967	0.454	1.326	1.325	0.805	0	1.23	0	9	0	9	9	0.45	-1.15	0.12	0.09	-0.4	NA	NA	NA	NA	-1.116289259	NA	NA	71.12	74.52	-0.182400411	0.032481993	0.33450947	0.160840837	1.026233226	0.802168213	-0.075821105	-0.416444679	-0.509023087	0.084109418
IND	2008	India	2	6	0.5	0.37	0.348	0.709	0.844	0.641	0.688	0.862	1.455	0.967	0.454	1.325	1.327	0.805	0	1.23	1	9	0	9	9	0.46	-1.11	-0.02	0.09	-0.34	NA	NA	NA	NA	-0.868360949	NA	NA	96.99	94.32	1.020753362	1.211248623	0.33450947	0.160840837	1.026233226	0.802168213	-0.075821105	-0.416444679	-0.509023087	0.084109418
IND	2009	India	2	6	0.5	0.37	0.348	0.709	0.844	0.641	0.689	0.862	1.455	0.967	0.454	1.243	1.158	0.805	0	1.23	0	9	0	9	9	0.46	-1.35	-0.01	0.01	-0.45	NA	NA	NA	NA	-0.62043264	NA	NA	61.76	64.02	-0.617712328	-0.592621524	0.33450947	0.160840837	1.026233226	0.802168213	-0.075821105	-0.416444679	-0.509023087	0.084109418
IND	2010	India	2	6	0.501	0.373	0.348	0.605	0.846	0.685	0.703	0.876	1.515	0.967	0.474	1.239	1.155	0.773	0	1.23	1	9	0	9	9	0.44	-1.28	0.03	-0.04	-0.47	12.85445819	0.035411731	0.059237135	1.43142637	-0.372504331	3.84119691	0.09817666	79.04	79.04	0.185940443	0.301574173	0.377453307	0.160840837	1.044082827	0.802168213	-0.072522291	-0.406275719	-0.509023087	-0.304611029
IND	2011	India	2	6	0.501	0.373	0.348	0.605	0.849	0.685	0.701	0.855	1.515	0.967	0.474	1.235	1.159	0.773	0	1.23	1	9	0	9	9	0.44	-1.33	0.01	-0.09	-0.54	24.79663739	0.066124366	0.095371682	3.032680032	-0.124576021	7.407915021	0.203563587	104.01	93.67	1.3472373	1.172551738	0.377453307	0.160840837	1.044082827	0.802168213	-0.072522291	-0.406275719	-0.509023087	-0.304611029
IND	2012	India	2	6	0.501	0.373	0.348	0.605	0.816	0.621	0.689	0.813	1.144	0.854	0.325	1.206	1.158	0.742	0	1.23	0	9	0	9	9	0.4	-1.29	-0.17	-0.07	-0.51	26.80727836	0.068560814	0.102317856	3.302274564	0.123352288	7.690864446	0.223822204	105.01	95.27	1.393744984	1.267805608	0.111917245	0.046922081	0.911103297	0.802168213	-0.072522291	-0.406275719	-0.509023087	-0.304611029
IND	2013	India	2	6	0.451	0.356	0.313	0.701	0.84	0.729	0.763	0.857	1.319	0.854	0.456	1.215	1.155	0.744	0	1.178	1	9	0	9	9	0.43	-1.23	-0.17	-0.06	-0.52	21.64184417	0.05240156	0.080452952	2.609673133	0.371280598	5.814258805	0.160052897	104.08	94.83	1.350492838	1.241610794	0.237170105	0.046922081	1.028018186	0.802168213	-0.237462967	-0.463899826	-0.624888815	0.054207845
IND	2014	India	2	6	0.436	0.356	0.314	0.694	0.832	0.72	0.746	0.844	1.1	1.557	0.677	1.177	1.245	0.677	0	1.011	0	9	0	9	9	0.41	-1	-0.21	-0.06	-0.43	14.81897549	0.035537111	0.016338451	1.694836462	0.619208907	3.855757642	-0.026937965	96.24	88.9	0.985872599	0.888576141	0.080425097	0.755637883	1.225256281	0.802168213	-0.286945169	-0.463899826	-0.621578366	0.028043969
IND	2015	India	2	6	0.436	0.257	0.35	0.679	0.723	0.679	0.722	0.691	0.322	1.557	0.683	1.014	1.212	0.558	0	1.017	1	9	0	9	9	0.43	-0.95	0.09	-0.05	-0.35	7.844242185	0.018284947	0.008434669	0.759637194	0.867137216	1.852230216	-0.04998946	50.75	51.86	-1.129761924	-1.316550929	-0.47641333	0.755637883	1.230611162	0.802168213	-0.286945169	-0.799475506	-0.502402189	-0.02802148
IND	2016	India	2	6	0.487	0.258	0.345	0.679	0.683	0.712	0.734	0.65	0.322	1.548	0.595	0.991	1.217	0.571	0	1.001	0	9	0	9	9	0.44	-0.95	0.08	-0.03	-0.28	5.855461057	0.013128836	0.006017946	0.492973714	1.115065526	1.253441095	-0.057037869	42.81	45.53	-1.499032931	-1.693399049	-0.47641333	0.746564708	1.152072916	0.802168213	-0.11870568	-0.796085853	-0.518954436	-0.02802148
IND	2017	India	2	5	0.488	0.256	0.346	0.705	0.65	0.685	0.669	0.561	-0.152	1.123	0.576	0.817	1.099	0.47	0	1.023	0	9	0	9	9	0.39	-0.76	0.09	0	-0.24	7.032905522	0.015288925	0.006710788	0.650850031	1.362993835	1.504296383	-0.055017185	52.81	54.28	-1.033956096	-1.172479452	-0.815669647	0.318109209	1.135115794	0.802168213	-0.115406867	-0.80286516	-0.515643986	0.069158632
IND	2018	India	2	6	0.459	0.277	0.347	0.706	0.641	0.686	0.69	0.65	-0.363	1.083	0.098	0.776	1.105	0.377	0	1.013	1	9	0	9	9	0.38	-0.96	0.28	0.03	-0.19	NA	NA	NA	NA	1.610922145	NA	NA	68.35	67.1	-0.311226694	-0.409257826	-0.96668881	0.277783985	0.708510321	0.802168213	-0.211072459	-0.73168244	-0.512333537	0.072896328
IRL	2005	Ireland	3	9	0.067	0.083	0.045	0.931	0.96	0.936	0.967	0.967	2.67	0.739	-1.287	1.647	1.475	0.929	0	1.885	0	10	0	10	10	1.62	1.3	1.74	1.6	1.59	NA	NA	NA	NA	-1.612145878	NA	NA	53.39	60.88	-1.00698164	-0.779557242	1.204122181	-0.069012936	-0.527574575	0.962172408	-1.504207354	-1.389275188	-1.512089247	0.913878066
IRL	2006	Ireland	3	9	0.066	0.083	0.045	0.928	0.964	0.928	0.971	0.97	2.67	0.739	-1.287	1.644	1.473	0.929	0	1.885	0	10	0	10	10	1.4	1.19	1.54	1.72	1.71	NA	NA	NA	NA	-1.364217568	NA	NA	64.29	71.49	-0.500047889	-0.147905022	1.204122181	-0.069012936	-0.527574575	0.962172408	-1.507506167	-1.389275188	-1.512089247	0.902664976
IRL	2007	Ireland	3	9	0.067	0.083	0.045	0.931	0.963	0.929	0.972	0.967	2.67	0.739	-1.287	1.666	1.525	0.929	0	1.885	0	10	0	10	10	1.4	1.21	1.56	1.75	1.75	NA	NA	NA	NA	-1.116289259	NA	NA	71.12	74.52	-0.182400411	0.032481993	1.204122181	-0.069012936	-0.527574575	0.962172408	-1.504207354	-1.389275188	-1.512089247	0.913878066
IRL	2008	Ireland	3	9	0.066	0.083	0.045	0.931	0.958	0.931	0.971	0.964	2.67	0.739	-1.287	1.678	1.523	0.929	0	1.885	0	10	0	10	10	1.42	1.19	1.5	1.72	1.75	NA	NA	NA	NA	-0.868360949	NA	NA	96.99	94.32	1.020753362	1.211248623	1.204122181	-0.069012936	-0.527574575	0.962172408	-1.507506167	-1.389275188	-1.512089247	0.913878066
IRL	2009	Ireland	3	9	0.057	0.062	0.045	0.93	0.959	0.931	0.975	0.97	2.67	0.739	-1.287	1.672	1.517	0.929	0	1.885	0	10	0	10	10	1.35	1.06	1.34	1.75	1.76	NA	NA	NA	NA	-0.62043264	NA	NA	61.76	64.02	-0.617712328	-0.592621524	1.204122181	-0.069012936	-0.527574575	0.962172408	-1.537195489	-1.460457908	-1.512089247	0.910140369
IRL	2010	Ireland	3	9	0.057	0.062	0.045	0.929	0.965	0.932	0.978	0.969	2.67	0.739	-1.287	1.684	1.522	0.929	0	1.885	0	10	0	10	10	1.32	1.02	1.35	1.77	1.69	0	0	0	-0.292149193	-0.372504331	-0.271236208	-0.074589294	79.04	79.04	0.185940443	0.301574173	1.204122181	-0.069012936	-0.527574575	0.962172408	-1.537195489	-1.460457908	-1.512089247	0.906402673
IRL	2011	Ireland	3	9	0.054	0.048	0.045	0.931	0.964	0.937	0.976	0.967	2.67	0.739	-1.287	1.729	1.584	0.929	0	1.885	0	10	0	10	10	1.31	0.95	1.46	1.76	1.56	0	0	0	-0.292149193	-0.124576021	-0.271236208	-0.074589294	104.01	93.67	1.3472373	1.172551738	1.204122181	-0.069012936	-0.527574575	0.962172408	-1.547091929	-1.507913055	-1.512089247	0.913878066
[truncated: 1,777 more rows]
[truncated: 74 more columns]
